# Supplementary material for: A hybrid scheduling approach for mega event transportation: integrating harmony search and black widow optimization
Source: PeerJ Comput Sci. 2024 Dec 10;10:e2526. doi: 10.7717/peerj-cs.2526 (PMC11784756; doi:10.7717/peerj-cs.2526)
Supplement: Supplemental Information 1 [file peerj-cs-10-2526-s001.xlsx]

## Sheet: File Describtion
Sheet No.	Descrption
1	"results" sheet contains the Statistical results of fitness values for 30 experimental tests with population sizes of 5, 20,50, and 100
2	"Anova" sheet contains an ANOVA test results for the compared algorithms with population sizes of 5,20,50, and 100
3	"Convergence 5" sheet contains the comparison of convergence rates (Scenarios 1 -8, population size of 5)
4	"Convergence 20" sheet contains the comparison of convergence rates (Scenarios 1 -8, population size of 20)
5	"Convergence 50" sheet contains the comparison of convergence rates (Scenarios 1 -8, population size of 50)
6	"Convergence 100" sheet contains the comparison of convergence rates (Scenarios 1 -8, population size of 100)

## Sheet: results
	HMS 5											HMS 20
		Sc1	Sc2	Sc3	Sc4	Sc5	Sc6	Sc7	Sc8				Sc1	Sc2	Sc3	Sc4	Sc5	Sc6	Sc7	Sc8
HSBWO	Mean	1108.03	1092.27	1133.8	1248.6	1255.17	1326.3	1689.57	2037.6		HSBWO	Mean	2074.93	2136.23	2146.63	2064.03	2122.8	2133.6	1910.9	2183.3
	Std	335.113	309.704	328.934	447.205	461.133	445.659	504.473	375.84			Std	276.366	240.12	185.951	307.037	280.775	248.631	372.079	177.462
	Best	866	893	925	931	897	973	1068	1173			Best	1217	1223	1783	1268	1494	1274	1405	1720
	Worst	1995	2065	1971	2063	2095	2136	2198	2268			Worst	2336	2337	2353	2358	2337	2379	2387	2428
HS	Mean	2420.5	2437.27	2410.13	2430.7	2382.1	2422.47	2349.33	2376.07		HS	Mean	2431.07	2440	2416.27	2437.13	2399.43	2433.77	2369.43	2417.73
	Std	14.701	16.7351	16.8415	11.3931	14.9836	14.6916	43.2812	111.366			Std	13.2325	18.0478	17.2965	12.2129	12.2071	16.6499	21.2484	23.7834
	Best	2389	2397	2384	2410	2349	2399	2289	1792			Best	2404	2397	2373	2418	2376	2382	2325	2395
	Worst	2445	2465	2441	2449	2407	2454	2553	2430			Worst	2454	2468	2454	2460	2424	2457	2427	2488
BWO	Mean	2517.57	-	2646.93	-	2581.77	-	2706.17	-		BWO	Mean	2678.97	-	2660.07	-	2656.53	-	2658.3	-
	Std	25.8279	-	37.2734	-	41.8871	-	31.6752	-			Std	31.2625	-	30.8466	-	28.7171	-	26.3611	-
	Best	2467	-	2589	-	2488	-	2646	-			Best	2620	-	2565	-	2591	-	2592	-
	Worst	2563	-	2720	-	2655	-	2759	-			Worst	2752	-	2705	-	2726	-	2725	-
	HMS 50											HMS 100
		Sc1	Sc2	Sc3	Sc4	Sc5	Sc6	Sc7	Sc8				Sc1	Sc2	Sc3	Sc4	Sc5	Sc6	Sc7	Sc8
HSBWO	Mean	2277.03	2258.87	2263.8	2269.83	2192.3	2232.7	1969.77	2198.47		HSBWO	Mean	2363.33	2348.2	2346.13	2352	2269.17	2368.13	2032.63	2272.7
	Std	101.816	87.2818	126.326	85.584	226.21	201.771	334.855	245.889			Std	57.9127	61.6723	116.942	67.7266	233.719	64.4616	177.611	202.862
	Best	2066	2099	1732	2131	1697	1725	1490	1649			Best	2210	2193	1829	2175	1722	2242	1803	1772
	Worst	2432	2434	2439	2434	2477	2465	2500	2493			Worst	2474	2455	2471	2462	2517	2490	2502	2510
HS	Mean	2431.5	2441.5	2429.57	2450.03	2417.93	2446.57	2417.1	2449.2		HS	Mean	2438.07	2449.8	2434.13	2453.73	2437.5	2462.4	2447.1	2480.47
	Std	19.5867	15.2242	19.0112	16.2491	15.6556	21.839	15.7225	13.1946			Std	13.8488	16.1382	27.5665	19.2711	21.2729	20.3853	91.151	24.9851
	Best	2389	2398	2365	2406	2390	2375	2390	2422			Best	2402	2415	2345	2375	2395	2405	1978	2405
	Worst	2458	2470	2460	2469	2454	2474	2468	2471			Worst	2461	2474	2466	2482	2464	2487	2499	2513
BWO	Mean	2730.2	-	2715	-	2701.43	-	2700.33	-		BWO	Mean	2767.13	-	2748.03	-	2741.27	-	2728.53	-
	Std	17.8604	-	18.8405	-	24.1314	-	21.4851	-			Std	30.2264	-	21.9835	-	23.654	-	21.5194	-
	Best	2684	-	2681	-	2659	-	2661	-			Best	2689	-	2711	-	2680	-	2683	-
	Worst	2761	-	2762	-	2762	-	2749	-			Worst	2816	-	2781	-	2783	-	2768	-

## Sheet: Anova
		Scenario 1				Scenario 2				Scenario 3				Scenario 4				Scenario 5				Scenario 6				Scenario 7				Scenario 8
		BWO	HS	HSBWO		HS	HSBWO			BWO	HS	HSBWO		HS	HSBWO			BWO	HS	HSBWO		HS	HSBWO			BWO	HS	HSBWO			HS	HSBWO				Table3 ANOVA test results for the compared algorithms with a 5-population size
HMS		0.3-0.3	0.3-0.3	0.3-0.3		0.3-0.5	0.3-0.5			0.5-0.3	0.5-0.3	0.5-0.3		0.5-0.5	0.5-0.5			0.7-0.3	0.7-0.3	0.7-0.3		0.7-0.5	0.7-0.5			0.9-0.3	0.9-0.3	0.9-0.3			0.9-0.5	0.9-0.5			Scenario	F-Value	P-Value	F-Critical
5	Run 1	2493	2389	983		2417	989			2631	2426	1008		2422	985			2605	2356	996		2412	1017			2736	2327	1086			2421	2194		5	Sc1	492.841	3.49611e-48	3.1013
	Run 2	2530	2426	977		2452	924			2609	2429	925		2410	1023			2584	2370	2040		2435	973			2728	2349	1137			2411	2224			Sc2	564.165	1.42892e-31	4.00687
	Run 3	2545	2417	1020		2421	2065			2667	2441	933		2449	1001			2635	2390	974		2433	1076			2701	2348	1120			2387	2234			Sc3	542.638	7.34976e-50	3.1013
	Run 4	2539	2412	909		2452	1004			2675	2401	937		2447	1033			2576	2386	2095		2434	1990			2708	2330	2155			2404	2182			Sc4	256.377	3.36687e-37	3.1013
	Run 5	2523	2417	1493		2409	959			2661	2418	1053		2438	1996			2603	2394	1985		2427	1081			2747	2356	1068			2402	2230			Sc5	214.543	2.32103e-34	3.1013
	Run 6	2507	2416	956		2439	978			2621	2407	970		2437	940			2609	2404	991		2414	2082			2681	2336	1210			2430	2187			Sc6	215.253	2.05949e-34	3.1013
	Run 7	2478	2425	888		2442	986			2667	2419	989		2446	2050			2539	2389	1050		2440	1283			2723	2325	1263			2380	1215			Sc7	93.0238	2.47009e-22	3.1013
	Run 8	2536	2417	941		2397	961			2656	2435	975		2428	1008			2596	2377	1532		2447	1017			2736	2346	2101			2406	2248			Sc8	65.9374	3.72027e-18	3.1013
	Run 9	2467	2430	976		2434	969			2625	2422	1435		2448	1044			2601	2381	935		2424	1002			2662	2350	1137			2395	2176
	Run 10	2556	2399	1975		2451	1437			2615	2415	925		2413	980			2625	2382	954		2429	1056			2727	2349	1195			2397	2197
	Run 11	2559	2429	1342		2453	911			2667	2384	1971		2425	1002			2628	2405	1031		2408	1920			2754	2331	2184			2402	2219
	Run 12	2486	2437	1002		2445	988			2611	2397	1970		2442	964			2562	2387	996		2417	1799			2687	2326	1198			2377	2060
	Run 13	2523	2421	929		2415	996			2703	2387	930		2421	968			2606	2403	2045		2432	2020			2695	2343	2125			2415	2204				Table3 ANOVA test results for the compared algorithms with a 5-population size
	Run 14	2515	2429	908		2465	982			2605	2417	982		2441	940			2641	2377	975		2414	991			2667	2326	2139			2385	2214			Scenario	F-Value	P-Value	F-Critical
	Run 15	2526	2433	948		2435	1602			2691	2389	962		2415	1467			2578	2392	2072		2403	1007			2701	2359	2140			1792	2219		20	Sc1	104.274	1.73563e-23	3.10516
	Run 16	2485	2421	866		2438	926			2640	2400	1346		2428	974			2613	2407	1065		2399	1077			2669	2319	2135			2404	1347			Sc2	43.7138	1.51345e-08	4.01297
	Run 17	2534	2440	1021		2437	931			2682	2384	978		2422	2059			2615	2381	977		2410	1035			2692	2315	1143			2419	2253			Sc3	165.688	2.14275e-30	3.1013
	Run 18	2505	2445	882		2426	2023			2672	2389	952		2433	997			2576	2375	990		2414	2076			2737	2336	1108			2414	1180			Sc4	87.7685	1.36239e-21	3.1013
	Run 19	2498	2426	984		2460	1003			2660	2409	988		2429	1018			2542	2391	976		2432	2110			2671	2369	2198			2375	2260			Sc5	80.3481	1.71236e-20	3.1013
	Run 20	2522	2417	977		2452	996			2606	2400	938		2421	2063			2584	2349	2067		2409	1410			2691	2289	1159			2405	2230			Sc6	100.271	2.60402e-23	3.1013
	Run 21	2551	2418	976		2455	1488			2720	2412	971		2425	1977			2525	2368	957		2406	1025			2759	2366	2168			2396	2201			Sc7	91.5869	3.91382e-22	3.1013
	Run 22	2524	2410	1009		2416	1012			2678	2439	1407		2417	2030			2655	2393	1009		2407	1010			2711	2370	1084			2375	2268			Sc8	154.736	2.22264e-29	3.1013
	Run 23	2472	2399	989		2438	1014			2718	2414	1598		2435	1013			2563	2355	1028		2409	973			2738	2320	2131			2388	2210
	Run 24	2544	2427	1945		2437	963			2596	2424	1026		2427	1029			2500	2376	1008		2454	976			2687	2366	2127			2369	2242
	Run 25	2505	2390	953		2447	893			2659	2405	998		2443	931			2590	2386	993		2427	1012			2728	2371	2195			2382	2220
	Run 26	2520	2433	960		2435	1007			2597	2391	1955		2442	1009			2488	2375	1031		2406	2136			2646	2343	2103			2394	1790
	Run 27	2563	2432	876		2410	895			2643	2412	952		2420	987			2570	2400	950		2448	985			2718	2553	2176			2400	2246				Table3 ANOVA test results for the compared algorithms with a 5-population size
	Run 28	2501	2397	1995		2451	945			2599	2391	1027		2439	946			2597	2362	897		2433	994			2653	2330	2162			2395	2244			Scenario	F-Value	P-Value	F-Critical
	Run 29	2514	2419	999		2441	1010			2645	2435	977		2419	999			2520	2376	954		2418	1560			2748	2366	2167			2379	1173		50	Sc1	456.799	7.30482e-46	3.10516
	Run 30	2506	2444	1562		2448	911			2589	2412	936		2439	2025			2527	2376	2082		2433	1096			2684	2366	1373			2383	1261			Sc2	146.984	2.71335e-17	4.01297
																																			Sc3	165.688	2.14275e-30	3.1013
																																			Sc4	87.7685	1.36239e-21	3.1013
																																			Sc5	80.3481	1.71236e-20	3.1013
20	Run 1	2708	2424	2285			2458	1856		2679	2407	2098		2729	2422	2315		2687	2422	1935		2667	2445	2095		2630	2357	1676		2692	2396	2428			Sc6	100.271	2.60402e-23	3.1013
	Run 2	2657	2431	2152			2447	2334		2675	2373	2289		2679	2446	1995		2642	2393	1508		2692	2438	2347		2669	2377	2346		2600	2419	2400			Sc7	91.5869	3.91382e-22	3.1013
	Run 3	2681	2404	2109			2437	2245		2675	2402	2308		2632	2427	2292		2620	2410	2330		2693	2437	1274		2677	2386	2112		2654	2405	2006			Sc8	154.736	2.22264e-29	3.1013
	Run 4	2705	2416	2287			2436	2280		2654	2411	1783		2634	2428	2047		2681	2401	1634		2663	2419	2359		2592	2383	2374		2655	2414	2379
	Run 5	2635	2438	2185			2451	2016		2686	2436	1868		2692	2446	2115		2687	2395	2170		2662	2433	1973		2695	2333	2347		2608	2410	2035
	Run 6	2620	2446	2286			2461	2255		2643	2415	2353		2709	2418	2290		2671	2380	2318		2665	2429	2260		2633	2369	1659		2654	2406	2191
	Run 7	2692	2434	1987			2430	2308		2650	2454	2097		2654	2447	2321		2657	2397	2309		2686	2411	2025		2635	2376	1505		2676	2412	1938
	Run 8	2711	2429	1217			2439	2268		2680	2433	2035		2658	2432	2339		2675	2376	2226		2592	2425	2363		2648	2351	1667		2657	2397	2136				Table3 ANOVA test results for the compared algorithms with a 5-population size
	Run 9	2679	2421	2282			2405	2276		2682	2431	1937		2667	2447	1294		2672	2413	2336		2647	2457	2347		2663	2411	2365		2643	2420	2018			Scenario	F-Value	P-Value	F-Critical
	Run 10	2685	2442	1858			2447	2083		2688	2393	1961		2657	2444	2358		2669	2381	2321		2632	2419	2007		2647	2361	1482		2617	2401	2225		100	Sc1	868.243	7.79571e-57	3.10516
	Run 11	2702	2431	2305			2422	1974		2698	2418	2040		2661	2423	2049		2654	2407	2295		2642	2452	1978		2645	2361	1640		2674	2419	2383			Sc2	71.9108	1.26234e-11	4.01297
	Run 12	2674	2425	1240			2447	2293		2634	2396	2302		2669	2421	2321		2634	2399	1585		2607	2450	1983		2672	2370	2326		2666	2413	2045			Sc3	177.444	1.0048e-36	2.71065
	Run 13	2654	2413	1993			2449	2057		2658	2417	2350		2708	2436	1275		2726	2393	2325		2672	2451	2379		2653	2376	1840		2657	2404	2195			Sc4	660.62	2.52146e-53	3.1013
	Run 14	2666	2452	2336			2468	2268		2607	2391	2068		2658	2454	2340		2648	2424	2337		2676	2436	2103		2646	2325	1550		2661	2408	2077			Sc5	92.6071	2.82145e-22	3.1013
	Run 15	2675	2434	1997			2451	1980		2565	2423	1865		2676	2429	2322		2646	2417	2308		2728	2428	1970		2633	2362	2330		2682	2488	2340			Sc6	668.959	1.51087e-53	3.1013
	Run 16	2672	2440	2288			2449	2337		2638	2403	1989		2695	2439	2291		2695	2392	2312		2594	2413	2317		2695	2370	1405		2617	2471	2371			Sc7	273.554	2.98539e-38	3.1013
	Run 17	2712	2453	2289			2462	2289		2692	2414	2311		2639	2432	2054		2630	2401	2331		2671	2382	2367		2662	2357	1591		2652	2404	2315			Sc8	109.29	1.84568e-24	3.1013
	Run 18	2623	2454	2048			2437	1905		2645	2423	2288		2591	2456	2285		2688	2387	1768		2656	2413	2340		2674	2391	1828		2629	2433	2058
	Run 19	2752	2416	2039			2397	2003		2685	2419	1954		2686	2433	1990		2649	2399	2325		2647	2448	2050		2666	2382	2373		2683	2455	1720
	Run 20	2660	2427	2020			2448	2255		2657	2412	2304		2627	2437	1268		2661	2403	2332		2663	2448	2156		2725	2361	1607		2629	2413	2376
	Run 21	2714	2413	2320			2457	1826		2705	2417	2342		2672	2452	2168		2667	2406	1494		2679	2432	2316		2690	2375	2376		2674	2397	2397
	Run 22	2653	2416	2312			2404	2275		2680	2395	1897		2669	2428	1997		2660	2405	1872		2627	2439	2327		2660	2387	1585		2700	2411	2217
	Run 23	2646	2447	2142			2436	2326		2596	2424	2301		2670	2432	2005		2611	2384	2242		2696	2445	2103		2667	2427	2373		2678	2463	1927
	Run 24	2702	2438	2261			2443	2318		2664	2436	2293		2678	2460	2315		2679	2394	2303		2660	2454	2359		2647	2367	1927		2649	2410	2104
	Run 25	2678	2443	1957			2449	2327		2649	2428	1930		2662	2442	2129		2591	2411	2115		2681	2437	1970		2657	2381	2387		2654	2395	2387
	Run 26	2698	2422	2260			2446	1223		2665	2445	2329		2675	2419	1882		2640	2397	2294		2678	2446	2362		2624	2375	1540		2697	2402	2112
	Run 27	2711	2430	2030			2438	2284		2644	2404	2312		2670	2456	1987		2620	2402	2139		2674	2446	1794		2676	2361	1707		2637	2401	2345
	Run 28	2626	2425	1804			2401	2281		2667	2431	2323		2698	2444	1940		2657	2413	1764		2652	2415	2353		2684	2341	1517		2676	2449	2175
	Run 29	2674	2422	1935			2443	2084		2655	2414	2313		2660	2443	2037		2617	2398	2175		2670	2442	1808		2658	2375	2346		2690	2401	2135
	Run 30	2704	2446	2024			2442	1861		2686	2423	2159		2657	2421	1900		2662	2383	2281		2679	2423	1923		2626	2335	1546		2678	2415	2064
50	Run 1	2743	2417	2066			2454	2434		2754	2448	2305		2725	2448	2323		2719	2390	2361		2728	2459	1860		2716	2419	2446		2694	2450	2421
	Run 2	2744	2418	2274			2425	2267		2717	2448	2275		2715	2448	2137		2732	2414	2203		2685	2449	2129		2719	2417	2469		2688	2439	2331
	Run 3	2735	2457	2158			2433	2200		2729	2439	2248		2686	2415	2428		2716	2433	2430		2670	2405	2309		2702	2426	1715		2697	2452	2239
	Run 4	2755	2389	2258			2462	2258		2691	2429	2312		2738	2463	2325		2698	2454	2148		2738	2429	2262		2688	2410	2500		2716	2437	1911
	Run 5	2716	2456	2412			2444	2197		2700	2421	2191		2721	2448	2237		2710	2414	2227		2737	2452	1789		2691	2418	2427		2698	2438	2290
	Run 6	2713	2444	2307			2425	2195		2738	2447	2335		2734	2460	2265		2659	2428	2335		2738	2459	2248		2669	2408	2478		2714	2457	2247
	Run 7	2740	2447	2364			2447	2258		2733	2415	2361		2695	2406	2203		2703	2453	1712		2736	2451	2269		2692	2438	1647		2686	2459	2260
	Run 8	2727	2395	2290			2442	2320		2721	2433	2428		2623	2436	2260		2726	2437	2329		2712	2375	2342		2697	2396	1861		2705	2455	2467
	Run 9	2741	2458	2280			2398	2161		2702	2440	1732		2756	2451	2221		2669	2405	2266		2690	2459	2159		2696	2403	1653		2670	2439	1649
	Run 10	2743	2456	2377			2465	2244		2710	2443	2319		2744	2458	2284		2762	2418	2291		2682	2473	2216		2690	2437	2489		2712	2422	2180
	Run 11	2739	2423	2427			2437	2161		2725	2440	2210		2702	2465	2431		2722	2399	2375		2671	2474	2229		2749	2437	1490		2687	2454	1694
	Run 12	2726	2453	2072			2446	2299		2710	2434	2218		2737	2469	2290		2668	2400	2319		2691	2437	2465		2665	2425	1602		2697	2455	2357
	Run 13	2736	2441	2228			2450	2253		2698	2451	2439		2701	2459	2434		2704	2405	1920		2698	2435	2427		2697	2413	2305		2692	2451	2411
	Run 14	2756	2428	2274			2470	2346		2713	2427	2146		2721	2464	2277		2718	2418	2411		2734	2459	1725		2709	2390	2019		2615	2471	2149
	Run 15	2706	2433	2408			2438	2255		2762	2407	2286		2716	2461	2423		2671	2428	1960		2704	2448	2309		2669	2428	1889		2690	2454	2323
	Run 16	2723	2451	2170			2447	2285		2695	2451	2256		2671	2469	2337		2742	2417	2296		2704	2461	2246		2718	2405	1816		2674	2458	1829
	Run 17	2722	2396	2240			2452	2288		2725	2426	2201		2724	2419	2255		2679	2402	1752		2709	2467	2308		2737	2427	1556		2677	2439	1677
	Run 18	2734	2431	2195			2441	2384		2699	2422	2173		2685	2453	2132		2714	2430	2210		2674	2439	2362		2661	2410	2454		2666	2430	2290
	Run 19	2700	2438	2287			2415	2296		2728	2422	2251		2761	2445	2242		2691	2392	1697		2655	2464	2186		2698	2418	1989		2661	2442	2294
	Run 20	2701	2438	2224			2449	2425		2704	2414	2172		2715	2452	2313		2705	2420	2249		2690	2453	2321		2706	2422	1823		2695	2423	2414
	Run 21	2715	2432	2214			2438	2240		2709	2419	2289		2714	2449	2131		2689	2428	2343		2729	2455	2314		2730	2398	1862		2680	2435	2290
	Run 22	2739	2410	2432			2431	2142		2696	2365	2282		2702	2451	2165		2686	2429	2312		2702	2449	2311		2703	2399	1605		2697	2471	2367
	Run 23	2743	2442	2400			2452	2433		2709	2428	2282		2714	2454	2279		2702	2423	1708		2717	2438	2299		2684	2428	1910		2724	2453	2489
	Run 24	2732	2447	2199			2425	2104		2718	2410	2296		2710	2453	2210		2708	2422	2085		2703	2458	2309		2708	2420	1656		2663	2452	2277
	Run 25	2732	2434	2279			2445	2249		2715	2442	2286		2735	2417	2288		2691	2406	2432		2656	2395	2315		2702	2468	1841		2689	2467	2000
	Run 26	2742	2449	2177			2447	2261		2701	2447	2436		2740	2466	2301		2702	2419	2206		2667	2452	2142		2670	2401	1797		2713	2441	2357
	Run 27	2715	2407	2419			2453	2288		2742	2460	2238		2740	2456	2205		2666	2423	2247		2675	2449	1754		2717	2415	1629		2717	2471	2200
	Run 28	2684	2417	2272			2455	2189		2697	2438	2411		2710	2462	2226		2681	2408	2277		2691	2446	2457		2692	2406	2224		2688	2445	1853
	Run 29	2743	2415	2397			2424	2099		2681	2415	2266		2726	2457	2170		2725	2423	2191		2664	2443	2454		2704	2419	1791		2675	2453	2195
	Run 30	2761	2423	2211			2435	2235		2728	2406	2270		2697	2447	2303		2685	2400	2477		2703	2464	2465		2731	2412	2150		2706	2463	2493
100	Run 1	2781	2432	2351			2439	2352		2737	2440	2310		2750	2460	2448		2723	2453	2404		2704	2473	2431		2747	2453	1936		2742	2490	1772
	Run 2	2717	2402	2427			2434	2337		2720	2453	2346		2743	2467	2297		2693	2458	1922		2741	2470	2428		2723	2390	2502		2711	2450	2385
	Run 3	2747	2450	2360			2469	2207		2729	2397	2351		2702	2448	2462		2732	2464	1865		2767	2458	2242		2740	2465	1902		2729	2455	2271
	Run 4	2765	2452	2355			2415	2358		2779	2449	2421		2722	2450	2440		2735	2417	2316		2729	2456	2296		2729	2483	2004		2705	2488	2380
	Run 5	2816	2421	2300			2474	2193		2715	2441	2425		2742	2375	2347		2728	2448	1796		2759	2482	2348		2760	2471	2051		2740	2494	2410
	Run 6	2805	2443	2279			2450	2391		2730	2447	2319		2696	2434	2349		2721	2400	2245		2725	2460	2439		2702	2458	2124		2733	2513	2448
	Run 7	2753	2430	2335			2431	2273		2773	2448	2266		2745	2459	2368		2739	2440	2345		2705	2442	2366		2747	2448	1884		2732	2415	2350
	Run 8	2811	2450	2362			2456	2284		2734	2390	2429		2742	2450	2418		2764	2456	2387		2737	2465	2315		2733	2458	2081		2737	2470	2263
	Run 9	2761	2448	2363			2464	2391		2722	2466	2334		2768	2450	2250		2759	2445	2350		2758	2469	2340		2714	2495	2070		2740	2493	2416
	Run 10	2762	2450	2474			2420	2346		2745	2430	2271		2751	2458	2246		2744	2409	2447		2740	2405	2286		2725	2442	1879		2742	2496	2490
	Run 11	2746	2443	2368			2456	2427		2779	2456	2284		2774	2440	2345		2740	2453	2470		2711	2476	2338		2685	2470	1933		2717	2485	2507
	Run 12	2709	2437	2294			2458	2352		2760	2370	2398		2763	2458	2223		2780	2429	2457		2741	2474	2258		2747	2433	1914		2723	2486	2375
	Run 13	2796	2437	2210			2469	2351		2753	2420	2245		2786	2461	2381		2748	2464	2374		2748	2450	2416		2713	2490	1838		2698	2495	1956
	Run 14	2744	2446	2339			2457	2376		2745	2437	2348		2748	2454	2360		2747	2451	2356		2749	2482	2380		2728	1978	1949		2697	2502	2343
	Run 15	2689	2440	2391			2454	2382		2771	2451	2385		2767	2463	2347		2726	2395	2232		2741	2430	2480		2726	2474	1803		2742	2460	2415
	Run 16	2762	2445	2405			2462	2257		2779	2436	2312		2740	2443	2412		2736	2451	2512		2726	2450	2349		2755	2441	2014		2708	2499	1946
	Run 17	2773	2410	2358			2454	2312		2741	2454	2350		2699	2465	2382		2755	2427	1722		2731	2469	2396		2735	2464	1994		2690	2405	2090
	Run 18	2760	2440	2413			2461	2299		2717	2345	1829		2771	2465	2345		2741	2430	2517		2701	2410	2425		2720	2475	2056		2740	2487	2340
	Run 19	2788	2436	2297			2471	2390		2761	2422	2373		2762	2478	2420		2680	2460	2407		2736	2487	2347		2742	2477	1855		2694	2495	2330
	Run 20	2781	2445	2367			2458	2406		2711	2447	2462		2717	2482	2364		2722	2400	2317		2751	2454	2429		2763	2459	2349		2742	2475	2510
	Run 21	2776	2443	2269			2449	2376		2734	2451	2463		2711	2465	2336		2759	2454	1847		2730	2484	2490		2698	2474	1914		2747	2474	1958
	Run 22	2783	2442	2357			2456	2335		2766	2446	2410		2726	2438	2433		2783	2420	1998		2738	2475	2441		2729	2463	1937		2740	2503	2280
	Run 23	2797	2406	2418			2429	2341		2781	2441	2455		2749	2454	2392		2781	2460	2401		2722	2444	2266		2712	2454	2105		2747	2494	2400
	Run 24	2797	2442	2386			2462	2423		2724	2449	2308		2745	2467	2316		2720	2437	2391		2742	2480	2370		2721	2480	2340		2735	2486	2319
	Run 25	2764	2426	2418			2449	2311		2773	2461	2471		2784	2464	2175		2754	2400	2478		2764	2469	2372		2721	2490	1932		2733	2506	2390
	Run 26	2741	2432	2440			2467	2408		2742	2437	2377		2758	2434	2393		2773	2430	2341		2730	2480	2290		2756	2452	1960		2726	2456	2397
	Run 27	2794	2442	2387			2427	2411		2763	2437	2307		2718	2447	2294		2746	2426	2442		2732	2471	2362		2715	2499	2356		2702	2507	1925
	Run 28	2779	2435	2454			2438	2455		2734	2439	2457		2768	2443	2322		2740	2450	2340		2738	2473	2366		2768	2447	2351		2726	2472	1911
	Run 29	2731	2456	2348			2435	2337		2767	2405	2316		2701	2472	2329		2719	2460	2402		2782	2455	2420		2683	2457	2006		2732	2475	2306
	Run 30	2786	2461	2375			2430	2365		2756	2459	2362		2747	2468	2366		2750	2438	1994		2717	2479	2358		2719	2473	1940		2687	2488	2298

## Sheet: Convergence 5
	Scenario 1					Scenario 2				Scenario 3				Scenario 4				Scenario 5							Scenario 6					Scenario 7				Scenario 8
	BWO	HS	HSBWO			HS	HSBWO			BWO	HS	HSBWO			HS	HSBWO		BWO	HS	HSBWO						HS	HSBWO			BWO	HS	HSBWO			HS	HSBWO
0	5110	2722	3810		0	2823	4645		0	5000	2971	4855	0		2859	4470	0	5530	3363	4750				0		3312	3700		0	4990	3250	4995	0		3269	3700
1	4129	2722	3810		1	2722	4435		1	4153	2971	4490	1		2823	4470	1	3737	3307	3675				1		3063	3700		1	4059	3250	3322	1		3142	3180
2	3719	2676	3810		2	2663	4435		2	4153	2903	3720	2		2823	4470	2	3737	3178	3675				2		2997	3700		2	3762	3250	3322	2		1792	3174
3	3566	2676	3810		3	2663	3580		3	3562	2903	2912	3		2744	3033	3	3445	2997	3308				3		2959	3079		3	3711	3187	3239	3		1792	3174
4	3324	2568	2785		4	2566	2849		4	3562	2903	2912	4		2709	3033	4	3445	2970	3308				4		2847	3079		4	3305	3187	3239	4		1792	3167
5	3324	2568	2785		5	2566	2826		5	3349	2827	2912	5		2660	3033	5	3224	2937	3308				5		2829	3079		5	3211	3121	3019	5		1792	2973
6	3088	2568	2785		6	2557	2826		6	3349	2827	2912	6		2660	3033	6	3224	2937	3308				6		2701	3079		6	3211	3121	3019	6		1792	2710
7	3088	2568	2785		7	2557	2826		7	3349	2827	2912	7		2653	2895	7	3224	2864	3114				7		2701	3056		7	3211	3004	2955	7		1792	2710
8	3088	2568	2785		8	2534	2826		8	3349	2740	2912	8		2653	2895	8	3224	2753	3114				8		2653	3056		8	3211	2949	2955	8		1792	2710
9	3088	2568	2785		9	2534	2670		9	3349	2740	2912	9		2545	2895	9	3224	2753	3114				9		2653	3056		9	3211	2895	2955	9		1792	2710
10	3088	2568	2785		10	2534	2670		10	3349	2740	2907	10		2545	2895	10	3224	2609	3114				10		2648	3050		10	3211	2881	2951	10		1792	2705
11	3088	2568	2785		11	2534	2670		11	3349	2688	2885	11		2545	2743	11	3224	2609	3114				11		2625	2907		11	3211	2881	2928	11		1792	2705
12	3088	2519	2785		12	2534	2670		12	3101	2688	2885	12		2545	2730	12	3137	2609	3114				12		2625	2907		12	3211	2840	2928	12		1792	2705
13	3088	2466	2785		13	2534	2663		13	3101	2624	2885	13		2536	2730	13	3081	2609	3114				13		2584	2907		13	3211	2773	2928	13		1792	2705
14	3088	2466	2708		14	2534	2663		14	3038	2624	2885	14		2536	2730	14	3081	2609	3112				14		2584	2907		14	3211	2749	2923	14		1792	2705
15	3088	2466	2708		15	2534	2663		15	3038	2624	2665	15		2536	2706	15	3081	2571	2883				15		2584	2737		15	3137	2687	2890	15		1792	2705
16	3088	2466	2708		16	2534	2634		16	2924	2624	2665	16		2536	2706	16	3081	2571	2883				16		2584	2737		16	3137	2687	2886	16		1792	2705
17	2969	2466	2708		17	2534	2634		17	2924	2624	2665	17		2536	2706	17	3081	2571	2883				17		2584	2737		17	3084	2687	2851	17		1792	2705
18	2969	2466	2708		18	2534	2634		18	2924	2609	2665	18		2536	2700	18	2932	2571	2883				18		2584	2737		18	3084	2687	2851	18		1792	2705
19	2969	2466	2594		19	2534	2603		19	2924	2609	2665	19		2536	2680	19	2932	2571	2764				19		2584	2737		19	3080	2667	2751	19		1792	2705
20	2969	2466	2594		20	2534	2603		20	2924	2609	2665	20		2536	2680	20	2847	2571	2764				20		2568	2737		20	3076	2667	2751	20		1792	2705
21	2969	2466	2594		21	2534	2603		21	2924	2609	2665	21		2536	2680	21	2847	2571	2764				21		2568	2712		21	3076	2649	2751	21		1792	2705
22	2969	2466	2594		22	2534	2603		22	2924	2609	2660	22		2536	2680	22	2847	2571	2764				22		2568	2712		22	3076	2649	2751	22		1792	2670
23	2924	2466	2594		23	2534	2603		23	2924	2609	2660	23		2536	2618	23	2847	2571	2742				23		2568	2698		23	3076	2621	2751	23		1792	2670
24	2924	2466	2559		24	2534	2603		24	2924	2609	2654	24		2536	2618	24	2847	2571	2742				24		2568	2698		24	3074	2619	2751	24		1792	2670
25	2924	2466	2552		25	2534	2603		25	2924	2609	2654	25		2536	2618	25	2847	2571	2742				25		2568	2698		25	3074	2619	2675	25		1792	2670
26	2920	2466	2552		26	2534	2603		26	2924	2543	2654	26		2536	2618	26	2847	2571	2742				26		2568	2698		26	2986	2619	2675	26		1792	2670
27	2920	2466	2552		27	2534	2603		27	2924	2543	2654	27		2536	2618	27	2847	2571	2624				27		2568	2630		27	2986	2619	2671	27		1792	2670
28	2842	2466	2552		28	2526	2597		28	2924	2543	2654	28		2536	2618	28	2847	2563	2624				28		2563	2630		28	2986	2589	2671	28		1792	2670
29	2842	2466	2544		29	2526	2535		29	2924	2543	2648	29		2536	2618	29	2847	2563	2624				29		2563	2630		29	2875	2534	2671	29		1792	2670
30	2842	2466	2544		30	2526	2535		30	2924	2543	2648	30		2536	2618	30	2847	2563	2624				30		2563	2630		30	2875	2534	2671	30		1792	2670
31	2842	2466	2544		31	2526	2535		31	2924	2543	2648	31		2536	2618	31	2847	2563	2567				31		2563	2630		31	2875	2534	2668	31		1792	2670
32	2842	2466	2544		32	2526	2535		32	2924	2543	2648	32		2536	2618	32	2847	2560	2567				32		2563	2626		32	2875	2534	2668	32		1792	2670
33	2842	2466	2544		33	2526	2535		33	2924	2543	2641	33		2536	2613	33	2847	2560	2567				33		2563	2626		33	2858	2534	2668	33		1792	2670
34	2842	2466	2529		34	2526	2535		34	2924	2543	2641	34		2536	2613	34	2847	2524	2567				34		2563	2626		34	2858	2534	2668	34		1792	2670
35	2842	2466	2529		35	2526	2535		35	2924	2543	2607	35		2533	2590	35	2795	2524	2563				35		2563	2626		35	2858	2534	2640	35		1792	2670
36	2842	2466	2529		36	2526	2535		36	2901	2543	2607	36		2505	2590	36	2795	2524	2561				36		2563	2626		36	2858	2534	2640	36		1792	2670
37	2842	2466	2529		37	2526	2535		37	2901	2543	2607	37		2505	2590	37	2793	2524	2561				37		2563	2626		37	2858	2534	2636	37		1792	2670
38	2842	2466	2529		38	2526	2527		38	2901	2543	2607	38		2505	2590	38	2793	2524	2561				38		2548	2626		38	2858	2534	2636	38		1792	2655
39	2842	2466	2527		39	2526	2527		39	2901	2543	2545	39		2505	2590	39	2793	2524	2481				39		2548	2569		39	2858	2534	2626	39		1792	2655
40	2832	2466	2527		40	2526	2523		40	2901	2492	2545	40		2505	2590	40	2793	2524	2476				40		2548	2569		40	2858	2534	2622	40		1792	2655
41	2832	2466	2527		41	2519	2523		41	2901	2492	2545	41		2505	2590	41	2793	2524	2476				41		2548	2569		41	2815	2534	2589	41		1792	2655
42	2832	2466	2527		42	2519	2523		42	2853	2492	2545	42		2505	2590	42	2793	2524	2476				42		2514	2569		42	2815	2534	2589	42		1792	2640
43	2832	2466	2523		43	2519	2523		43	2853	2492	2545	43		2505	2573	43	2772	2524	2476				43		2514	2569		43	2815	2534	2589	43		1792	2640
44	2832	2466	2523		44	2519	2523		44	2853	2492	2540	44		2505	2573	44	2772	2524	2476				44		2514	2569		44	2815	2534	2589	44		1792	2640
45	2832	2466	2523		45	2519	2523		45	2853	2492	2540	45		2505	2573	45	2772	2524	2476				45		2514	2563		45	2815	2534	2589	45		1792	2640
46	2832	2466	2523		46	2519	2523		46	2853	2492	2540	46		2505	2573	46	2772	2524	2476				46		2514	2563		46	2815	2534	2589	46		1792	2640
47	2832	2466	2523		47	2519	2520		47	2853	2492	2540	47		2505	2562	47	2772	2524	2476				47		2514	2563		47	2815	2512	2589	47		1792	2640
48	2832	2466	2523		48	2475	2520		48	2853	2492	2540	48		2505	2562	48	2772	2524	2471				48		2504	2563		48	2815	2512	2589	48		1792	2640
49	2801	2466	2523		49	2475	2520		49	2853	2492	2534	49		2505	2562	49	2751	2524	2471				49		2504	2563		49	2815	2512	2579	49		1792	2640
50	2801	2465	2523		50	2475	2520		50	2853	2492	2534	50		2505	2562	50	2751	2524	2471				50		2504	2563		50	2790	2512	2579	50		1792	2640
51	2801	2465	2523		51	2475	2520		51	2853	2492	2534	51		2505	2522	51	2751	2524	2471				51		2504	2563		51	2790	2512	2545	51		1792	2640
52	2801	2465	2523		52	2475	2520		52	2853	2482	2534	52		2505	2522	52	2751	2524	2471				52		2504	2563		52	2749	2512	2545	52		1792	2640
53	2801	2465	2511		53	2475	2520		53	2853	2482	2529	53		2486	2522	53	2750	2524	2471				53		2504	2563		53	2749	2512	2545	53		1792	2640
54	2801	2465	2504		54	2475	2520		54	2853	2482	2529	54		2486	2522	54	2750	2524	2471				54		2504	2563		54	2749	2512	2545	54		1792	2640
55	2801	2465	2504		55	2475	2520		55	2853	2482	2529	55		2486	2522	55	2750	2524	2471				55		2504	2563		55	2749	2512	2545	55		1792	2640
56	2801	2465	2504		56	2475	2520		56	2853	2482	2529	56		2486	2522	56	2750	2524	2471				56		2504	2563		56	2749	2512	2545	56		1792	2640
57	2801	2465	2504		57	2475	2520		57	2853	2482	2529	57		2486	2522	57	2750	2524	2471				57		2504	2563		57	2749	2512	2545	57		1792	2640
58	2801	2465	2504		58	2475	2520		58	2853	2482	2528	58		2486	2517	58	2750	2524	2471				58		2504	2563		58	2749	2512	2544	58		1792	2640
59	2801	2465	2504		59	2475	2520		59	2853	2482	2528	59		2486	2517	59	2750	2524	2471				59		2504	2563		59	2749	2512	2544	59		1792	2640
60	2801	2465	2504		60	2475	2518		60	2853	2482	2528	60		2486	2517	60	2750	2524	2471				60		2504	2563		60	2749	2512	2544	60		1792	2640
61	2801	2465	2504		61	2475	2518		61	2853	2482	2528	61		2486	2517	61	2750	2524	2471				61		2504	2558		61	2749	2512	2544	61		1792	2640
62	2787	2465	2501		62	2475	2518		62	2845	2482	2523	62		2486	2517	62	2750	2524	2471				62		2504	2558		62	2707	2512	2544	62		1792	2615
63	2787	2465	2501		63	2475	2518		63	2845	2482	2523	63		2486	2517	63	2750	2524	2471				63		2504	2558		63	2707	2498	2530	63		1792	2615
64	2787	2465	2501		64	2475	2518		64	2845	2482	2523	64		2486	2516	64	2750	2524	2471				64		2504	2558		64	2707	2498	2530	64		1792	2615
65	2787	2465	2501		65	2475	2518		65	2845	2482	2523	65		2486	2516	65	2750	2524	2471				65		2497	2558		65	2707	2498	2530	65		1792	1912
66	2787	2465	2501		66	2475	2514		66	2845	2482	2523	66		2486	2516	66	2750	2497	2466				66		2497	2558		66	2707	2498	2530	66		1792	1912
67	2787	2465	2501		67	2475	2509		67	2845	2482	2523	67		2486	2516	67	2750	2497	2466				67		2497	2558		67	2707	2498	2530	67		1792	1912
68	2787	2465	2492		68	2475	2509		68	2845	2482	2523	68		2486	2516	68	2750	2497	2466				68		2497	2558		68	2707	2498	2530	68		1792	1912
69	2787	2465	2492		69	2475	2509		69	2845	2482	2523	69		2486	2506	69	2750	2497	2466				69		2497	2553		69	2707	2498	2530	69		1792	1912
70	2787	2465	2492		70	2475	2509		70	2845	2482	2523	70		2486	2506	70	2750	2497	2466				70		2497	2549		70	2707	2498	2530	70		1792	1912
71	2787	2465	2492		71	2475	2509		71	2845	2482	2511	71		2486	2506	71	2750	2497	2466				71		2497	2549		71	2707	2498	2530	71		1792	1912
72	2787	2465	2492		72	2475	2509		72	2845	2482	2511	72		2486	2506	72	2750	2497	2466				72		2479	2549		72	2707	2498	2530	72		1792	1912
73	2787	2465	2492		73	2475	2509		73	2845	2482	2506	73		2486	2506	73	2750	2497	2466				73		2479	2549		73	2707	2498	2530	73		1792	1912
74	2787	2465	2492		74	2475	2509		74	2845	2482	2506	74		2486	2506	74	2750	2497	2466				74		2479	2549		74	2707	2498	2530	74		1792	1912
75	2787	2465	2487		75	2475	2509		75	2837	2482	2506	75		2486	2506	75	2750	2497	2466				75		2479	2549		75	2707	2498	2530	75		1792	1912
76	2786	2465	2487		76	2475	2508		76	2825	2482	2506	76		2486	2506	76	2750	2497	2466				76		2479	2549		76	2707	2498	2530	76		1792	1912
77	2786	2465	2487		77	2475	2508		77	2825	2482	2506	77		2486	2506	77	2750	2497	2466				77		2479	2547		77	2707	2498	2530	77		1792	1912
78	2786	2465	2487		78	2475	2508		78	2825	2482	2506	78		2486	2506	78	2750	2497	2466				78		2479	2547		78	2707	2498	2530	78		1792	1912
79	2786	2465	2487		79	2475	2508		79	2825	2482	2506	79		2486	2506	79	2746	2497	2466				79		2479	2547		79	2707	2498	2528	79		1792	1912
80	2786	2465	2481		80	2475	2508		80	2825	2482	2506	80		2486	2506	80	2746	2497	2461				80		2479	2547		80	2707	2498	2525	80		1792	1897
81	2786	2465	2481		81	2475	2508		81	2780	2482	2502	81		2486	2506	81	2746	2497	2461				81		2479	2547		81	2707	2498	2525	81		1792	1897
82	2786	2465	2481		82	2475	2508		82	2780	2482	2502	82		2486	2506	82	2746	2497	2461				82		2479	2547		82	2707	2498	2525	82		1792	1897
83	2786	2465	2481		83	2475	2508		83	2780	2482	2502	83		2486	2506	83	2746	2497	2461				83		2479	2547		83	2707	2498	2511	83		1792	1897
84	2786	2465	2481		84	2475	2508		84	2779	2482	2502	84		2486	2506	84	2746	2497	2461				84		2479	2547		84	2707	2498	2511	84		1792	1897
85	2786	2465	2481		85	2475	2502		85	2747	2482	2502	85		2473	2506	85	2746	2497	2461				85		2479	2547		85	2707	2498	2511	85		1792	1897
86	2786	2465	2481		86	2475	2502		86	2747	2482	2502	86		2473	2506	86	2746	2497	2461				86		2479	2547		86	2707	2493	2511	86		1792	1897
87	2786	2465	2481		87	2475	2502		87	2747	2482	2502	87		2473	2506	87	2746	2497	2461				87		2479	2547		87	2707	2493	2511	87		1792	1897
88	2786	2465	2474		88	2475	2502		88	2747	2482	2502	88		2473	2506	88	2746	2497	2461				88		2479	2547		88	2707	2493	2511	88		1792	1897
89	2786	2465	2474		89	2475	2502		89	2747	2482	2502	89		2473	2500	89	2746	2497	2461				89		2479	2547		89	2707	2493	2511	89		1792	1897
90	2729	2465	2474		90	2475	2502		90	2747	2482	2502	90		2473	2500	90	2746	2497	2461				90		2479	2547		90	2707	2493	2511	90		1792	1892
91	2729	2465	2474		91	2475	2502		91	2747	2482	2483	91		2473	2500	91	2746	2497	2461				91		2479	2547		91	2707	2493	2454	91		1792	1892
92	2729	2465	2469		92	2475	2502		92	2747	2482	2483	92		2473	2500	92	2746	2497	2460				92		2479	2543		92	2707	2493	2454	92		1792	1869
93	2729	2465	2469		93	2475	2502		93	2747	2482	2483	93		2473	2500	93	2746	2497	2460				93		2479	2543		93	2707	2493	2454	93		1792	1869
94	2729	2465	2469		94	2475	2502		94	2747	2482	2483	94		2473	2500	94	2746	2497	2456				94		2479	2543		94	2707	2493	2450	94		1792	1869
95	2729	2465	2463		95	2475	2502		95	2747	2482	2483	95		2473	2500	95	2746	2497	2456				95		2479	2543		95	2707	2493	2450	95		1792	1869
96	2729	2465	2463		96	2475	2502		96	2747	2482	2483	96		2473	2500	96	2746	2497	2456				96		2479	2543		96	2707	2493	2450	96		1792	1865
97	2729	2465	2463		97	2475	2502		97	2747	2482	2483	97		2470	2500	97	2732	2497	2456				97		2479	2541		97	2707	2493	2450	97		1792	1865
98	2729	2465	2463		98	2475	2497		98	2747	2482	2483	98		2470	2500	98	2716	2481	2450				98		2479	2537		98	2707	2493	2450	98		1792	1865
99	2729	2465	2456		99	2475	2497		99	2747	2482	2483	99		2470	2500	99	2716	2481	2450				99		2479	2537		99	2707	2483	2450	99		1792	1865
100	2729	2465	2456		100	2475	2497		100	2747	2482	2471	100		2470	2500	100	2716	2481	2450				100		2479	2537		100	2707	2483	2450	100		1792	1865
101	2729	2465	2456		101	2475	2497		101	2747	2482	2471	101		2470	2500	101	2716	2481	2450				101		2479	2537		101	2707	2483	2450	101		1792	1865
102	2729	2465	2456		102	2475	2497		102	2747	2482	2471	102		2470	2496	102	2716	2481	2439				102		2479	2537		102	2707	2483	2450	102		1792	1865
103	2729	2465	2456		103	2475	2497		103	2739	2482	2471	103		2470	2496	103	2716	2476	2439				103		2479	2537		103	2707	2483	2450	103		1792	1865
104	2729	2465	2456		104	2475	2497		104	2739	2482	2471	104		2470	2496	104	2716	2476	2439				104		2479	2537		104	2707	2483	2450	104		1792	1865
105	2729	2465	2456		105	2475	2497		105	2732	2482	2471	105		2470	2496	105	2716	2476	2439				105		2479	2537		105	2707	2483	2450	105		1792	1865
106	2729	2465	2456		106	2475	2497		106	2732	2482	2471	106		2470	2496	106	2716	2476	2439				106		2479	2537		106	2707	2483	2450	106		1792	1862
107	2729	2465	2456		107	2475	2497		107	2732	2445	2471	107		2470	2496	107	2716	2476	2439				107		2479	2537		107	2707	2483	2450	107		1792	1862
108	2729	2465	2455		108	2475	2497		108	2732	2445	2471	108		2470	2496	108	2716	2476	2439				108		2479	2537		108	2707	2483	2450	108		1792	1837
109	2729	2465	2455		109	2475	2497		109	2732	2445	2467	109		2470	2496	109	2716	2476	2439				109		2479	2526		109	2707	2483	2450	109		1792	1837
110	2729	2465	2455		110	2475	2497		110	2732	2445	2467	110		2470	2496	110	2716	2476	2439				110		2479	2526		110	2707	2483	2450	110		1792	1837
111	2729	2465	2451		111	2475	2496		111	2732	2445	2467	111		2470	2496	111	2716	2474	2439				111		2479	2526		111	2707	2483	2450	111		1792	1837
112	2729	2465	2451		112	2475	2496		112	2703	2445	2467	112		2470	2496	112	2716	2474	2439				112		2479	2526		112	2707	2483	2450	112		1792	1837
113	2729	2465	2451		113	2475	2496		113	2703	2445	2467	113		2470	2496	113	2716	2474	2439				113		2479	2526		113	2707	2483	2450	113		1792	1837
114	2729	2465	2451		114	2475	2496		114	2703	2445	2465	114		2470	2496	114	2716	2474	2437				114		2479	2521		114	2707	2483	2450	114		1792	1812
115	2729	2465	2451		115	2475	2490		115	2703	2445	2465	115		2470	2496	115	2716	2474	2437				115		2479	2521		115	2707	2483	2450	115		1792	1812
116	2729	2465	2451		116	2475	2490		116	2703	2445	2460	116		2470	2496	116	2716	2474	2437				116		2479	2521		116	2707	2479	2450	116		1792	1812
117	2729	2465	2451		117	2475	2490		117	2703	2437	2460	117		2470	2496	117	2716	2474	2437				117		2479	2521		117	2707	2479	2450	117		1792	1812
118	2729	2465	2451		118	2475	2490		118	2703	2437	2460	118		2470	2496	118	2716	2474	2434				118		2479	2521		118	2707	2479	2450	118		1792	1780
119	2729	2465	2451		119	2475	2490		119	2703	2437	2460	119		2470	2496	119	2716	2474	2434				119		2479	2521		119	2707	2479	2450	119		1792	1780
120	2729	2465	2445		120	2475	2490		120	2703	2437	2460	120		2470	2496	120	2716	2474	2431				120		2479	2521		120	2707	2479	2450	120		1792	1780
121	2729	2465	2445		121	2475	2490		121	2703	2437	2460	121		2470	2496	121	2716	2474	2431				121		2479	2521		121	2707	2479	2450	121		1792	1780
122	2729	2465	2445		122	2475	2490		122	2703	2437	2460	122		2470	2496	122	2716	2474	2431				122		2479	2521		122	2707	2479	2445	122		1792	1780
123	2729	2465	2443		123	2475	2490		123	2703	2437	2460	123		2470	2496	123	2716	2474	2431				123		2479	2521		123	2682	2479	2445	123		1792	1780
124	2729	2465	2443		124	2475	2490		124	2703	2437	2460	124		2470	2496	124	2716	2474	2423				124		2479	2521		124	2682	2479	2445	124		1792	1780
125	2729	2465	2443		125	2475	2490		125	2703	2437	2460	125		2470	2496	125	2716	2474	2423				125		2479	2521		125	2682	2479	2445	125		1792	1780
126	2729	2465	2443		126	2475	2489		126	2703	2437	2455	126		2470	2494	126	2716	2474	2423				126		2479	2521		126	2682	2479	2445	126		1792	1780
127	2729	2465	2443		127	2475	2486		127	2703	2437	2455	127		2470	2494	127	2716	2474	2423				127		2479	2521		127	2682	2479	2445	127		1792	1780
128	2729	2465	2434		128	2475	2486		128	2703	2437	2455	128		2470	2494	128	2716	2474	2423				128		2479	2515		128	2682	2479	2440	128		1792	1780
129	2719	2465	2434		129	2475	2486		129	2703	2437	2455	129		2470	2487	129	2716	2474	2423				129		2479	2515		129	2682	2479	2440	129		1792	1780
130	2719	2465	2434		130	2475	2486		130	2703	2437	2455	130		2470	2487	130	2716	2474	2423				130		2479	2515		130	2682	2479	2440	130		1792	1780
131	2719	2465	2427		131	2475	2486		131	2703	2437	2455	131		2470	2487	131	2716	2474	2423				131		2479	2515		131	2682	2479	2440	131		1792	1780
132	2719	2465	2427		132	2475	2478		132	2703	2437	2455	132		2470	2487	132	2716	2474	2423				132		2479	2515		132	2682	2479	2440	132		1792	1780
133	2719	2465	2427		133	2475	2478		133	2703	2437	2449	133		2470	2487	133	2716	2474	2423				133		2479	2515		133	2682	2479	2440	133		1792	1780
134	2719	2465	2427		134	2475	2478		134	2703	2437	2449	134		2470	2487	134	2716	2474	2423				134		2479	2515		134	2682	2479	2440	134		1792	1780
135	2719	2465	2427		135	2475	2478		135	2703	2437	2449	135		2470	2487	135	2716	2474	2423				135		2479	2515		135	2682	2467	2440	135		1792	1780
136	2719	2465	2427		136	2475	2478		136	2703	2437	2449	136		2470	2487	136	2716	2474	2423				136		2479	2509		136	2682	2467	2440	136		1792	1780
137	2719	2465	2420		137	2475	2478		137	2703	2437	2449	137		2470	2482	137	2716	2461	2423				137		2479	2509		137	2682	2467	2440	137		1792	1780
138	2719	2465	2420		138	2475	2465		138	2703	2437	2449	138		2470	2482	138	2716	2461	2423				138		2479	2509		138	2682	2467	2439	138		1792	1780
139	2719	2465	2420		139	2475	2465		139	2703	2437	2449	139		2470	2482	139	2677	2461	2423				139		2479	2509		139	2682	2467	2439	139		1792	1780
140	2713	2465	2420		140	2475	2465		140	2703	2437	2449	140		2470	2482	140	2677	2459	2423				140		2479	2509		140	2682	2467	2439	140		1792	1780
141	2713	2465	2420		141	2475	2464		141	2682	2437	2449	141		2470	2482	141	2677	2459	2416				141		2479	2509		141	2682	2467	2439	141		1792	1780
142	2713	2465	2420		142	2475	2464		142	2682	2437	2449	142		2470	2482	142	2677	2459	2416				142		2479	2509		142	2682	2467	2439	142		1792	1780
143	2713	2465	2420		143	2475	2464		143	2682	2437	2449	143		2470	2482	143	2677	2459	2416				143		2479	2509		143	2682	2467	2439	143		1792	1780
144	2713	2465	2420		144	2475	2464		144	2682	2437	2442	144		2470	2482	144	2677	2459	2416				144		2479	2509		144	2682	2467	2439	144		1792	1780
145	2713	2465	2415		145	2475	2464		145	2682	2437	2442	145		2470	2480	145	2677	2459	2416				145		2479	2508		145	2682	2467	2439	145		1792	1780
146	2713	2465	2415		146	2475	2462		146	2682	2437	2442	146		2470	2480	146	2677	2459	2416				146		2479	2508		146	2682	2467	2434	146		1792	1780
147	2713	2465	2415		147	2475	2462		147	2682	2437	2442	147		2470	2480	147	2677	2459	2416				147		2479	2508		147	2682	2467	2434	147		1792	1780
148	2713	2465	2415		148	2475	2462		148	2682	2437	2442	148		2470	2477	148	2677	2459	2410				148		2479	2508		148	2682	2467	2434	148		1792	1780
149	2713	2465	2415		149	2427	2462		149	2682	2437	2442	149		2470	2477	149	2677	2459	2410				149		2479	2508		149	2682	2467	2434	149		1792	1780
150	2713	2465	2415		150	2427	2462		150	2682	2437	2442	150		2470	2477	150	2677	2459	2410				150		2479	2498		150	2682	2467	2434	150		1792	1780
151	2713	2465	2415		151	2427	2462		151	2682	2437	2442	151		2470	2477	151	2677	2459	2410				151		2479	2498		151	2682	2467	2434	151		1792	1780
152	2713	2465	2415		152	2427	2462		152	2682	2437	2442	152		2436	2477	152	2677	2459	2410				152		2479	2498		152	2682	2467	2434	152		1792	1780
153	2713	2465	2415		153	2427	2462		153	2682	2437	2442	153		2436	2477	153	2677	2440	2410				153		2479	2498		153	2682	2467	2434	153		1792	1780
154	2713	2465	2415		154	2427	2462		154	2682	2437	2442	154		2436	2477	154	2677	2440	2410				154		2479	2498		154	2682	2467	2434	154		1792	1780
155	2713	2465	2410		155	2427	2460		155	2682	2437	2442	155		2436	2477	155	2677	2440	2410				155		2479	2498		155	2682	2467	2434	155		1792	1780
156	2713	2465	2410		156	2427	2460		156	2682	2437	2442	156		2436	2477	156	2677	2440	2410				156		2479	2498		156	2682	2456	2434	156		1792	1780
157	2713	2465	2410		157	2427	2460		157	2682	2437	2442	157		2436	2471	157	2677	2440	2404				157		2479	2498		157	2682	2456	2434	157		1792	1780
158	2713	2465	2410		158	2427	2452		158	2682	2437	2438	158		2436	2471	158	2677	2440	2404				158		2479	2498		158	2682	2456	2434	158		1792	1780
159	2713	2465	2410		159	2427	2452		159	2682	2437	2438	159		2436	2471	159	2677	2440	2404				159		2479	2498		159	2682	2456	2434	159		1792	1780
160	2713	2465	2408		160	2427	2450		160	2682	2437	2438	160		2436	2471	160	2677	2440	2404				160		2479	2498		160	2682	2456	2434	160		1792	1780
161	2713	2465	2408		161	2427	2450		161	2682	2437	2438	161		2436	2471	161	2677	2440	2404				161		2479	2498		161	2682	2456	2434	161		1792	1780
162	2713	2465	2408		162	2427	2450		162	2682	2437	2431	162		2436	2471	162	2677	2440	2404				162		2479	2498		162	2682	2456	2434	162		1792	1775
163	2712	2465	2408		163	2427	2442		163	2682	2437	2431	163		2436	2471	163	2677	2440	2404				163		2479	2498		163	2682	2456	2434	163		1792	1775
164	2712	2465	2408		164	2427	2442		164	2682	2437	2431	164		2436	2471	164	2677	2440	2399				164		2479	2498		164	2682	2456	2432	164		1792	1775
165	2712	2465	2408		165	2427	2442		165	2682	2437	2431	165		2436	2471	165	2677	2440	2399				165		2479	2493		165	2682	2456	2432	165		1792	1775
166	2712	2465	2408		166	2427	2442		166	2682	2437	2431	166		2436	2471	166	2677	2440	2399				166		2479	2493		166	2682	2456	2432	166		1792	1775
167	2712	2465	2408		167	2427	2442		167	2682	2437	2431	167		2436	2471	167	2677	2440	2399				167		2479	2493		167	2682	2456	2432	167		1792	1775
168	2712	2465	2408		168	2427	2442		168	2682	2437	2431	168		2436	2471	168	2677	2440	2399				168		2467	2493		168	2682	2456	2432	168		1792	1775
169	2712	2465	2408		169	2427	2442		169	2682	2437	2431	169		2436	2465	169	2677	2440	2399				169		2467	2492		169	2682	2456	2432	169		1792	1775
170	2712	2465	2408		170	2427	2442		170	2682	2437	2431	170		2436	2465	170	2677	2440	2399				170		2467	2492		170	2682	2456	2432	170		1792	1775
171	2712	2465	2408		171	2427	2442		171	2682	2437	2431	171		2436	2465	171	2677	2440	2399				171		2467	2492		171	2682	2456	2432	171		1792	1775
172	2712	2465	2408		172	2427	2442		172	2682	2437	2431	172		2436	2465	172	2677	2440	2398				172		2467	2492		172	2682	2456	2432	172		1792	1775
173	2712	2465	2405		173	2427	2442		173	2682	2437	2431	173		2436	2465	173	2677	2440	2398				173		2467	2492		173	2682	2456	2432	173		1792	1775
174	2711	2465	2405		174	2427	2442		174	2682	2437	2431	174		2436	2465	174	2677	2440	2398				174		2467	2492		174	2682	2456	2430	174		1792	1775
175	2711	2465	2398		175	2427	2442		175	2682	2437	2431	175		2436	2465	175	2677	2440	2398				175		2467	2492		175	2682	2456	2430	175		1792	1775
176	2711	2465	2398		176	2427	2442		176	2682	2437	2431	176		2436	2465	176	2677	2440	2387				176		2467	2492		176	2682	2456	2430	176		1792	1775
177	2711	2465	2398		177	2427	2442		177	2682	2437	2431	177		2436	2465	177	2677	2440	2387				177		2467	2492		177	2682	2456	2430	177		1792	1775
178	2711	2451	2398		178	2427	2442		178	2682	2437	2420	178		2436	2465	178	2677	2440	2387				178		2467	2491		178	2682	2456	2430	178		1792	1775
179	2711	2451	2398		179	2427	2442		179	2682	2412	2420	179		2436	2465	179	2677	2440	2387				179		2467	2491		179	2682	2456	2430	179		1792	1775
180	2711	2451	2398		180	2427	2442		180	2682	2412	2420	180		2436	2465	180	2677	2440	2387				180		2467	2491		180	2682	2456	2430	180		1792	1775
181	2711	2451	2398		181	2427	2442		181	2682	2412	2420	181		2436	2465	181	2677	2440	2387				181		2467	2491		181	2682	2456	2430	181		1792	1775
182	2711	2451	2398		182	2427	2442		182	2682	2412	2420	182		2436	2465	182	2677	2440	2387				182		2467	2491		182	2682	2456	2429	182		1792	1775
183	2709	2451	2398		183	2427	2442		183	2682	2412	2420	183		2436	2465	183	2677	2438	2387				183		2467	2491		183	2682	2456	2429	183		1792	1775
184	2709	2451	2398		184	2427	2442		184	2682	2412	2420	184		2436	2465	184	2677	2438	2381				184		2467	2487		184	2682	2456	2429	184		1792	1775
185	2709	2451	2398		185	2427	2436		185	2682	2412	2420	185		2436	2464	185	2677	2438	2381				185		2467	2487		185	2682	2456	2429	185		1792	1775
186	2709	2451	2397		186	2427	2436		186	2682	2412	2420	186		2436	2464	186	2677	2438	2381				186		2467	2487		186	2682	2456	2429	186		1792	1763
187	2709	2451	2393		187	2427	2436		187	2682	2412	2420	187		2436	2464	187	2677	2438	2381				187		2467	2487		187	2682	2456	2429	187		1792	1763
188	2709	2451	2393		188	2427	2436		188	2682	2412	2420	188		2436	2464	188	2677	2438	2381				188		2467	2486		188	2682	2456	2429	188		1792	1763
189	2709	2451	2393		189	2427	2436		189	2682	2412	2420	189		2436	2464	189	2677	2438	2381				189		2467	2486		189	2682	2456	2429	189		1792	1763
190	2709	2451	2393		190	2427	2428		190	2682	2412	2420	190		2436	2464	190	2677	2438	2381				190		2467	2486		190	2682	2456	2429	190		1792	1758
191	2709	2451	2389		191	2427	2428		191	2682	2412	2420	191		2436	2464	191	2677	2438	2381				191		2467	2486		191	2682	2456	2429	191		1792	1758
192	2709	2451	2389		192	2427	2428		192	2682	2412	2420	192		2436	2464	192	2677	2438	2381				192		2467	2486		192	2682	2456	2429	192		1792	1733
193	2709	2451	2389		193	2427	2428		193	2682	2412	2408	193		2436	2464	193	2677	2438	2381				193		2467	2482		193	2682	2456	2429	193		1792	1733
194	2709	2451	2389		194	2427	2428		194	2682	2412	2407	194		2436	2464	194	2677	2438	2381				194		2467	2482		194	2682	2456	2429	194		1792	1733
195	2709	2451	2389		195	2427	2427		195	2682	2412	2407	195		2436	2464	195	2677	2438	2381				195		2467	2482		195	2682	2448	2429	195		1792	1733
196	2709	2451	2389		196	2427	2427		196	2682	2412	2407	196		2436	2464	196	2677	2438	2381				196		2467	2482		196	2682	2448	2429	196		1792	1733
197	2709	2451	2389		197	2427	2427		197	2682	2412	2407	197		2436	2464	197	2677	2438	2381				197		2467	2482		197	2682	2448	2429	197		1792	1733
198	2709	2389	2377		198	2427	2427		198	2682	2412	2407	198		2436	2458	198	2677	2438	2381				198		2467	2482		198	2682	2448	2429	198		1792	1733
199	2709	2389	2377		199	2427	2427		199	2682	2412	2407	199		2436	2458	199	2677	2438	2381				199		2467	2482		199	2682	2448	2429	199		1792	1733
200	2709	2389	2377		200	2427	2427		200	2682	2412	2407	200		2436	2458	200	2677	2438	2381				200		2467	2480		200	2682	2448	2429	200		1792	1733
201	2709	2389	2374		201	2427	2427		201	2682	2412	2407	201		2436	2456	201	2677	2438	2381				201		2467	2480		201	2682	2448	2427	201		1792	1733
202	2709	2389	2374		202	2427	2427		202	2682	2412	2407	202		2436	2453	202	2677	2438	2381				202		2467	2480		202	2682	2448	2425	202		1792	1733
203	2709	2389	2374		203	2427	2422		203	2682	2412	2407	203		2436	2453	203	2677	2438	2381				203		2467	2480		203	2682	2448	2425	203		1792	1733
204	2709	2389	2374		204	2427	2422		204	2682	2412	2407	204		2436	2453	204	2677	2438	2376				204		2467	2480		204	2682	2448	2425	204		1792	1733
205	2703	2389	2374		205	2427	2422		205	2682	2412	2407	205		2436	2453	205	2677	2438	2376				205		2467	2480		205	2682	2448	2425	205		1792	1733
206	2703	2389	2374		206	2427	2422		206	2682	2412	2407	206		2436	2452	206	2677	2438	2376				206		2467	2480		206	2682	2448	2425	206		1792	1722
207	2703	2389	2374		207	2427	2422		207	2682	2412	2407	207		2436	2452	207	2677	2438	2376				207		2467	2480		207	2682	2448	2425	207		1792	1722
208	2703	2389	2374		208	2427	2422		208	2682	2412	2406	208		2436	2452	208	2677	2438	2376				208		2467	2475		208	2682	2436	2425	208		1792	1722
209	2703	2389	2374		209	2427	2422		209	2682	2412	2406	209		2436	2452	209	2677	2438	2376				209		2467	2475		209	2682	2436	2425	209		1792	1722
210	2703	2389	2369		210	2427	2422		210	2682	2412	2406	210		2436	2452	210	2677	2438	2376				210		2467	2475		210	2682	2436	2425	210		1792	1719
211	2703	2389	2369		211	2427	2414		211	2682	2412	2406	211		2436	2452	211	2677	2438	2376				211		2467	2475		211	2682	2436	2425	211		1792	1719
212	2703	2389	2369		212	2427	2414		212	2682	2412	2405	212		2436	2448	212	2677	2438	2376				212		2467	2471		212	2682	2436	2424	212		1792	1719
213	2703	2389	2369		213	2427	2414		213	2682	2412	2405	213		2436	2448	213	2677	2438	2376				213		2467	2471		213	2682	2426	2424	213		1792	1719
214	2703	2389	2369		214	2427	2414		214	2682	2412	2405	214		2436	2448	214	2677	2438	2376				214		2467	2471		214	2682	2426	2420	214		1792	1719
215	2703	2389	2369		215	2427	2404		215	2682	2412	2405	215		2436	2448	215	2677	2438	2376				215		2467	2471		215	2682	2426	2420	215		1792	1719
216	2703	2389	2369		216	2427	2404		216	2682	2412	2405	216		2436	2448	216	2677	2438	2376				216		2467	2471		216	2682	2426	2420	216		1792	1719
217	2703	2389	2369		217	2427	2404		217	2682	2412	2405	217		2436	2448	217	2677	2438	2375				217		2467	2471		217	2682	2426	2420	217		1792	1719
218	2700	2389	2369		218	2427	2404		218	2682	2412	2405	218		2436	2436	218	2677	2438	2374				218		2467	2471		218	2682	2426	2420	218		1792	1719
219	2700	2389	2369		219	2427	2404		219	2682	2412	2405	219		2436	2436	219	2677	2438	2374				219		2467	2471		219	2682	2426	2420	219		1792	1719
220	2700	2389	2369		220	2427	2404		220	2682	2412	2405	220		2436	2436	220	2677	2438	2374				220		2467	2464		220	2682	2426	2420	220		1792	1719
221	2700	2389	2369		221	2427	2404		221	2682	2412	2405	221		2436	2436	221	2677	2438	2371				221		2428	2464		221	2682	2426	2420	221		1792	1719
222	2678	2389	2368		222	2427	2399		222	2682	2412	2405	222		2436	2436	222	2677	2438	2371				222		2428	2464		222	2682	2426	2420	222		1792	1719
223	2678	2389	2368		223	2427	2399		223	2682	2412	2405	223		2436	2436	223	2677	2438	2371				223		2428	2464		223	2682	2426	2420	223		1792	1719
224	2678	2389	2368		224	2427	2399		224	2682	2412	2405	224		2436	2436	224	2677	2438	2365				224		2428	2464		224	2682	2426	2420	224		1792	1707
225	2678	2389	2368		225	2427	2399		225	2682	2412	2405	225		2436	2436	225	2677	2438	2365				225		2428	2464		225	2682	2426	2420	225		1792	1707
226	2678	2389	2368		226	2427	2399		226	2682	2412	2402	226		2436	2436	226	2677	2438	2365				226		2428	2464		226	2682	2426	2420	226		1792	1707
227	2678	2389	2365		227	2427	2398		227	2682	2412	2402	227		2436	2436	227	2677	2438	2365				227		2428	2464		227	2682	2426	2420	227		1792	1707
228	2678	2389	2365		228	2427	2398		228	2682	2412	2400	228		2436	2436	228	2677	2438	2365				228		2428	2464		228	2682	2426	2420	228		1792	1707
229	2678	2389	2365		229	2427	2398		229	2682	2412	2400	229		2436	2436	229	2677	2438	2362				229		2428	2464		229	2682	2426	2420	229		1792	1707
230	2678	2389	2365		230	2427	2398		230	2682	2412	2400	230		2436	2435	230	2677	2438	2362				230		2428	2464		230	2682	2426	2420	230		1792	1707
231	2678	2389	2364		231	2427	2398		231	2682	2412	2400	231		2436	2435	231	2677	2438	2362				231		2428	2464		231	2682	2426	2420	231		1792	1707
232	2678	2389	2353		232	2427	2374		232	2682	2412	2400	232		2436	2434	232	2677	2438	2362				232		2428	2464		232	2682	2426	2420	232		1792	1707
233	2678	2389	2353		233	2427	2374		233	2682	2412	2400	233		2436	2434	233	2677	2438	2362				233		2428	2458		233	2682	2426	2420	233		1792	1707
234	2678	2389	2353		234	2427	2374		234	2682	2412	2400	234		2436	2434	234	2677	2438	2355				234		2428	2458		234	2682	2426	2420	234		1792	1685
235	2678	2389	2353		235	2427	2374		235	2682	2412	2400	235		2436	2434	235	2677	2438	2355				235		2428	2458		235	2682	2426	2420	235		1792	1685
236	2678	2389	2353		236	2427	2373		236	2682	2412	2398	236		2436	2434	236	2677	2438	2355				236		2428	2458		236	2682	2425	2420	236		1792	1685
237	2678	2389	2349		237	2427	2373		237	2682	2412	2398	237		2436	2434	237	2677	2438	2355				237		2428	2458		237	2682	2425	2420	237		1792	1685
238	2678	2389	2349		238	2427	2373		238	2682	2412	2398	238		2436	2434	238	2677	2438	2355				238		2428	2458		238	2682	2425	2420	238		1792	1685
239	2678	2389	2349		239	2427	2373		239	2682	2412	2398	239		2436	2434	239	2677	2438	2355				239		2428	2458		239	2682	2425	2420	239		1792	1685
240	2678	2389	2349		240	2427	2368		240	2682	2412	2393	240		2436	2434	240	2677	2438	2354				240		2428	2458		240	2682	2425	2415	240		1792	1685
241	2678	2389	2348		241	2427	2368		241	2682	2412	2393	241		2436	2434	241	2677	2438	2354				241		2428	2458		241	2682	2425	2415	241		1792	1685
242	2678	2389	2348		242	2427	2368		242	2682	2412	2393	242		2436	2430	242	2677	2438	2350				242		2428	2458		242	2682	2425	2410	242		1792	1685
243	2678	2389	2348		243	2427	2368		243	2682	2412	2393	243		2436	2430	243	2677	2438	2350				243		2428	2458		243	2682	2425	2410	243		1792	1685
244	2678	2389	2348		244	2427	2368		244	2682	2412	2392	244		2436	2430	244	2677	2438	2350				244		2428	2458		244	2682	2425	2410	244		1792	1664
245	2678	2389	2348		245	2427	2368		245	2682	2412	2392	245		2436	2430	245	2677	2438	2350				245		2428	2458		245	2682	2425	2410	245		1792	1664
246	2678	2389	2348		246	2427	2361		246	2682	2412	2392	246		2436	2430	246	2677	2438	2350				246		2428	2458		246	2682	2425	2406	246		1792	1664
247	2678	2389	2348		247	2427	2361		247	2682	2412	2392	247		2436	2430	247	2677	2438	2350				247		2428	2458		247	2682	2425	2406	247		1792	1664
248	2678	2389	2348		248	2427	2361		248	2682	2412	2392	248		2436	2430	248	2677	2438	2350				248		2428	2452		248	2682	2425	2406	248		1792	1650
249	2678	2389	2348		249	2427	2361		249	2682	2412	2392	249		2436	2430	249	2677	2438	2350				249		2428	2452		249	2682	2425	2406	249		1792	1650
250	2678	2389	2348		250	2427	2361		250	2682	2412	2392	250		2436	2429	250	2677	2438	2350				250		2428	2452		250	2682	2425	2406	250		1792	1650
251	2678	2389	2348		251	2427	2361		251	2682	2412	2392	251		2436	2429	251	2677	2438	2350				251		2428	2452		251	2682	2419	2406	251		1792	1650
252	2668	2389	2347		252	2427	2361		252	2682	2412	2383	252		2436	2429	252	2677	2438	2350				252		2428	2452		252	2682	2419	2406	252		1792	1650
253	2668	2389	2347		253	2427	2361		253	2682	2412	2383	253		2436	2429	253	2677	2438	2348				253		2428	2445		253	2682	2419	2406	253		1792	1650
254	2668	2389	2347		254	2427	2361		254	2682	2412	2383	254		2436	2429	254	2677	2438	2348				254		2428	2445		254	2682	2419	2406	254		1792	1650
255	2668	2389	2347		255	2427	2349		255	2682	2412	2383	255		2436	2429	255	2677	2438	2348				255		2428	2445		255	2682	2419	2406	255		1792	1650
256	2668	2389	2338		256	2427	2349		256	2682	2412	2383	256		2436	2423	256	2677	2438	2348				256		2428	2440		256	2682	2419	2406	256		1792	1650
257	2668	2389	2338		257	2427	2349		257	2682	2412	2383	257		2436	2423	257	2677	2438	2348				257		2428	2440		257	2682	2419	2406	257		1792	1650
258	2668	2389	2338		258	2427	2349		258	2675	2412	2380	258		2436	2418	258	2677	2438	2347				258		2428	2440		258	2682	2419	2405	258		1792	1650
259	2668	2389	2338		259	2427	2349		259	2675	2412	2380	259		2436	2418	259	2677	2438	2347				259		2428	2440		259	2682	2419	2405	259		1792	1650
260	2668	2389	2338		260	2427	2349		260	2675	2412	2380	260		2436	2416	260	2677	2438	2347				260		2428	2440		260	2682	2419	2401	260		1792	1650
261	2668	2389	2338		261	2427	2349		261	2675	2412	2380	261		2436	2416	261	2677	2438	2347				261		2428	2440		261	2682	2419	2401	261		1792	1650
262	2667	2389	2338		262	2427	2349		262	2675	2412	2380	262		2436	2416	262	2677	2438	2347				262		2428	2433		262	2682	2419	2401	262		1792	1650
263	2667	2389	2338		263	2427	2349		263	2675	2412	2380	263		2436	2416	263	2677	2438	2347				263		2428	2433		263	2682	2419	2401	263		1792	1650
264	2667	2389	2338		264	2427	2349		264	2675	2412	2379	264		2436	2416	264	2677	2438	2347				264		2428	2433		264	2682	2419	2401	264		1792	1650
265	2667	2389	2338		265	2427	2349		265	2675	2412	2379	265		2436	2416	265	2677	2438	2347				265		2428	2433		265	2682	2419	2401	265		1792	1650
266	2667	2389	2338		266	2427	2349		266	2675	2412	2368	266		2436	2416	266	2677	2438	2347				266		2428	2433		266	2682	2419	2401	266		1792	1650
267	2667	2389	2329		267	2427	2349		267	2675	2412	2368	267		2436	2416	267	2677	2438	2347				267		2428	2433		267	2682	2419	2401	267		1792	1650
268	2667	2389	2329		268	2427	2344		268	2675	2412	2368	268		2436	2415	268	2677	2438	2347				268		2428	2433		268	2682	2419	2400	268		1792	1650
269	2667	2389	2329		269	2427	2344		269	2675	2412	2368	269		2436	2415	269	2677	2438	2347				269		2428	2433		269	2682	2419	2400	269		1792	1650
270	2667	2389	2329		270	2427	2344		270	2675	2412	2368	270		2436	2404	270	2677	2438	2347				270		2428	2433		270	2682	2419	2400	270		1792	1650
271	2667	2389	2329		271	2427	2344		271	2675	2412	2368	271		2436	2404	271	2677	2438	2347				271		2428	2433		271	2682	2419	2400	271		1792	1650
272	2667	2389	2329		272	2427	2344		272	2675	2412	2368	272		2436	2404	272	2677	2438	2340				272		2428	2433		272	2682	2419	2400	272		1792	1633
273	2666	2389	2329		273	2427	2344		273	2675	2412	2368	273		2436	2400	273	2677	2438	2340				273		2428	2427		273	2682	2419	2400	273		1792	1633
274	2666	2389	2329		274	2427	2344		274	2675	2412	2368	274		2436	2400	274	2677	2438	2340				274		2428	2427		274	2682	2419	2395	274		1792	1633
275	2666	2389	2324		275	2419	2344		275	2675	2412	2368	275		2436	2400	275	2677	2438	2340				275		2428	2427		275	2682	2419	2395	275		1792	1633
276	2666	2389	2324		276	2419	2344		276	2675	2412	2368	276		2436	2400	276	2677	2438	2340				276		2428	2427		276	2682	2419	2395	276		1792	1633
277	2666	2389	2324		277	2419	2344		277	2675	2412	2368	277		2436	2399	277	2677	2438	2340				277		2428	2427		277	2682	2419	2395	277		1792	1633
278	2666	2389	2324		278	2419	2344		278	2667	2412	2368	278		2436	2399	278	2677	2438	2340				278		2428	2427		278	2682	2419	2395	278		1792	1633
279	2666	2389	2324		279	2419	2344		279	2667	2412	2368	279		2436	2399	279	2677	2438	2340				279		2428	2427		279	2682	2419	2395	279		1792	1633
280	2666	2389	2323		280	2419	2343		280	2667	2412	2368	280		2436	2399	280	2677	2438	2340				280		2428	2427		280	2682	2419	2395	280		1792	1617
281	2666	2389	2323		281	2419	2343		281	2667	2412	2368	281		2436	2392	281	2677	2438	2340				281		2428	2427		281	2682	2419	2395	281		1792	1617
282	2666	2389	2323		282	2419	2343		282	2667	2412	2368	282		2436	2392	282	2677	2420	2340				282		2428	2427		282	2682	2419	2395	282		1792	1617
283	2666	2389	2323		283	2419	2333		283	2667	2412	2368	283		2436	2392	283	2677	2420	2340				283		2428	2427		283	2682	2419	2395	283		1792	1617
284	2666	2389	2323		284	2419	2333		284	2667	2412	2364	284		2436	2392	284	2677	2420	2340				284		2428	2427		284	2682	2419	2395	284		1792	1617
285	2666	2389	2323		285	2419	2333		285	2667	2412	2364	285		2436	2392	285	2677	2420	2334				285		2428	2427		285	2682	2419	2395	285		1792	1617
286	2666	2389	2323		286	2419	2333		286	2667	2412	2364	286		2436	2392	286	2677	2420	2334				286		2428	2425		286	2682	2408	2395	286		1792	1617
287	2666	2389	2323		287	2419	2326		287	2667	2412	2364	287		2436	2392	287	2677	2420	2334				287		2428	2425		287	2682	2408	2395	287		1792	1617
288	2666	2389	2321		288	2419	2326		288	2667	2412	2361	288		2436	2392	288	2677	2420	2334				288		2428	2420		288	2682	2408	2395	288		1792	1617
289	2666	2389	2321		289	2419	2326		289	2667	2412	2361	289		2436	2392	289	2677	2420	2334				289		2428	2420		289	2682	2408	2395	289		1792	1617
290	2666	2389	2321		290	2419	2326		290	2667	2412	2361	290		2431	2391	290	2677	2420	2334				290		2428	2420		290	2682	2408	2395	290		1792	1617
291	2666	2389	2318		291	2419	2326		291	2667	2412	2361	291		2431	2391	291	2677	2420	2334				291		2428	2420		291	2682	2408	2395	291		1792	1617
292	2666	2389	2313		292	2419	2326		292	2648	2412	2361	292		2431	2391	292	2677	2420	2334				292		2428	2420		292	2682	2408	2395	292		1792	1617
293	2666	2389	2313		293	2419	2326		293	2648	2412	2361	293		2431	2388	293	2677	2420	2334				293		2428	2420		293	2682	2408	2395	293		1792	1617
294	2666	2389	2313		294	2419	2326		294	2648	2412	2361	294		2431	2388	294	2677	2420	2334				294		2428	2420		294	2682	2408	2395	294		1792	1617
295	2666	2389	2313		295	2419	2326		295	2648	2412	2361	295		2431	2388	295	2677	2420	2334				295		2428	2420		295	2682	2401	2395	295		1792	1617
296	2662	2389	2313		296	2419	2326		296	2648	2412	2361	296		2431	2388	296	2677	2420	2334				296		2428	2420		296	2682	2401	2395	296		1792	1617
297	2662	2389	2313		297	2419	2325		297	2648	2412	2361	297		2431	2388	297	2677	2420	2334				297		2428	2414		297	2682	2401	2395	297		1792	1617
298	2662	2389	2313		298	2419	2325		298	2648	2412	2361	298		2431	2388	298	2677	2420	2334				298		2428	2414		298	2682	2401	2395	298		1792	1617
299	2662	2389	2313		299	2419	2325		299	2648	2412	2361	299		2431	2388	299	2677	2420	2334				299		2428	2414		299	2682	2401	2395	299		1792	1617
300	2662	2389	2313		300	2419	2325		300	2648	2412	2361	300		2431	2385	300	2677	2420	2324				300		2428	2414		300	2682	2401	2395	300		1792	1617
301	2662	2389	2313		301	2419	2325		301	2648	2412	2361	301		2431	2385	301	2677	2420	2324				301		2428	2414		301	2682	2401	2395	301		1792	1617
302	2662	2389	2313		302	2419	2325		302	2648	2412	2361	302		2431	2385	302	2677	2420	2324				302		2428	2414		302	2682	2401	2390	302		1792	1617
303	2662	2389	2308		303	2419	2325		303	2648	2412	2361	303		2431	2385	303	2677	2420	2324				303		2428	2414		303	2682	2401	2390	303		1792	1617
304	2656	2389	2308		304	2419	2325		304	2648	2412	2358	304		2431	2385	304	2677	2420	2324				304		2428	2414		304	2682	2401	2390	304		1792	1617
305	2656	2389	2308		305	2419	2325		305	2648	2412	2358	305		2431	2385	305	2677	2420	2324				305		2428	2414		305	2682	2401	2390	305		1792	1617
306	2656	2389	2308		306	2419	2324		306	2648	2412	2358	306		2431	2385	306	2677	2420	2324				306		2428	2414		306	2682	2401	2390	306		1792	1617
307	2656	2389	2308		307	2419	2323		307	2644	2412	2358	307		2431	2385	307	2677	2420	2324				307		2428	2414		307	2682	2401	2390	307		1792	1617
308	2656	2389	2306		308	2419	2323		308	2644	2412	2358	308		2431	2379	308	2677	2420	2324				308		2428	2414		308	2682	2401	2390	308		1792	1613
309	2656	2389	2306		309	2419	2323		309	2644	2412	2350	309		2431	2379	309	2677	2420	2324				309		2428	2401		309	2682	2401	2390	309		1792	1613
310	2656	2389	2306		310	2419	2323		310	2644	2412	2350	310		2431	2376	310	2677	2420	2324				310		2428	2401		310	2682	2401	2390	310		1792	1613
311	2656	2389	2296		311	2419	2323		311	2644	2412	2350	311		2431	2376	311	2677	2420	2324				311		2428	2401		311	2682	2401	2390	311		1792	1613
312	2656	2389	2296		312	2419	2323		312	2644	2412	2350	312		2431	2376	312	2677	2420	2324				312		2428	2401		312	2682	2401	2390	312		1792	1613
313	2656	2389	2296		313	2419	2323		313	2644	2412	2350	313		2431	2376	313	2677	2420	2320				313		2428	2396		313	2682	2401	2390	313		1792	1613
314	2656	2389	2296		314	2419	2323		314	2644	2412	2350	314		2431	2376	314	2677	2420	2315				314		2428	2396		314	2682	2401	2390	314		1792	1613
315	2656	2389	2296		315	2419	2321		315	2644	2412	2350	315		2431	2376	315	2677	2420	2315				315		2428	2396		315	2682	2401	2390	315		1792	1613
316	2653	2389	2295		316	2419	2321		316	2644	2412	2350	316		2431	2376	316	2677	2420	2315				316		2428	2389		316	2682	2401	2385	316		1792	1613
317	2653	2389	2295		317	2419	2321		317	2644	2408	2339	317		2431	2370	317	2677	2420	2315				317		2428	2389		317	2682	2401	2385	317		1792	1613
318	2653	2389	2295		318	2419	2321		318	2642	2408	2339	318		2431	2370	318	2677	2420	2315				318		2428	2389		318	2682	2401	2385	318		1792	1613
319	2653	2389	2295		319	2419	2321		319	2642	2408	2339	319		2431	2370	319	2677	2420	2315				319		2428	2389		319	2682	2401	2385	319		1792	1613
320	2653	2389	2295		320	2419	2321		320	2642	2408	2336	320		2431	2370	320	2677	2420	2315				320		2428	2389		320	2682	2401	2384	320		1792	1613
321	2653	2389	2295		321	2419	2320		321	2642	2408	2336	321		2431	2370	321	2677	2420	2313				321		2428	2386		321	2682	2401	2384	321		1792	1613
322	2653	2389	2295		322	2419	2319		322	2642	2408	2334	322		2431	2370	322	2677	2420	2313				322		2428	2386		322	2682	2401	2384	322		1792	1613
323	2653	2389	2294		323	2419	2319		323	2642	2408	2334	323		2431	2370	323	2677	2420	2313				323		2428	2386		323	2682	2401	2384	323		1792	1613
324	2653	2389	2294		324	2419	2319		324	2642	2408	2334	324		2431	2370	324	2677	2420	2313				324		2428	2386		324	2682	2401	2384	324		1792	1602
325	2653	2389	2286		325	2419	2315		325	2642	2408	2333	325		2431	2370	325	2677	2420	2313				325		2428	2386		325	2682	2401	2384	325		1792	1602
326	2653	2389	2286		326	2419	2315		326	2642	2408	2333	326		2431	2364	326	2677	2420	2313				326		2428	2386		326	2682	2401	2384	326		1792	1580
327	2653	2389	2286		327	2419	2315		327	2628	2408	2333	327		2431	2364	327	2677	2420	2313				327		2428	2386		327	2682	2401	2384	327		1792	1580
328	2653	2389	2286		328	2419	2315		328	2628	2408	2333	328		2431	2364	328	2677	2420	2307				328		2428	2386		328	2682	2401	2384	328		1792	1580
329	2650	2389	2286		329	2419	2315		329	2628	2408	2330	329		2431	2364	329	2677	2420	2307				329		2428	2379		329	2682	2401	2384	329		1792	1580
330	2650	2389	2286		330	2419	2312		330	2628	2408	2324	330		2431	2364	330	2677	2420	2307				330		2428	2379		330	2682	2401	2380	330		1792	1569
331	2650	2389	2279		331	2419	2312		331	2628	2408	2324	331		2431	2364	331	2677	2420	2307				331		2428	2379		331	2682	2401	2380	331		1792	1569
332	2650	2389	2279		332	2419	2312		332	2628	2408	2324	332		2431	2364	332	2677	2420	2307				332		2428	2379		332	2682	2401	2380	332		1792	1569
333	2650	2389	2279		333	2419	2312		333	2628	2408	2324	333		2431	2364	333	2677	2420	2307				333		2428	2379		333	2682	2401	2380	333		1792	1569
334	2650	2389	2279		334	2419	2312		334	2628	2408	2324	334		2431	2364	334	2677	2420	2307				334		2428	2379		334	2682	2401	2374	334		1792	1569
335	2650	2389	2279		335	2419	2312		335	2628	2408	2324	335		2431	2364	335	2677	2420	2307				335		2428	2379		335	2682	2401	2374	335		1792	1569
336	2650	2389	2279		336	2419	2308		336	2628	2408	2324	336		2431	2364	336	2677	2420	2307				336		2428	2379		336	2682	2401	2374	336		1792	1569
337	2650	2389	2279		337	2419	2308		337	2628	2408	2320	337		2431	2364	337	2677	2420	2307				337		2428	2379		337	2682	2401	2374	337		1792	1569
338	2636	2389	2277		338	2419	2308		338	2628	2408	2320	338		2431	2360	338	2677	2420	2307				338		2428	2378		338	2682	2401	2374	338		1792	1569
339	2636	2389	2277		339	2419	2308		339	2628	2408	2320	339		2431	2360	339	2677	2420	2307				339		2428	2378		339	2682	2401	2374	339		1792	1569
340	2636	2389	2277		340	2419	2308		340	2628	2408	2320	340		2431	2360	340	2677	2420	2307				340		2428	2378		340	2682	2401	2374	340		1792	1569
341	2636	2389	2277		341	2419	2308		341	2628	2408	2319	341		2431	2358	341	2677	2420	2307				341		2428	2373		341	2682	2401	2374	341		1792	1569
342	2636	2389	2272		342	2419	2308		342	2628	2408	2319	342		2431	2348	342	2677	2420	2301				342		2428	2373		342	2682	2401	2374	342		1792	1569
343	2636	2389	2272		343	2419	2308		343	2628	2408	2319	343		2431	2348	343	2677	2420	2301				343		2428	2373		343	2682	2401	2374	343		1792	1569
344	2636	2389	2272		344	2419	2308		344	2628	2408	2319	344		2431	2348	344	2669	2420	2301				344		2428	2373		344	2682	2401	2374	344		1792	1569
345	2636	2389	2271		345	2419	2300		345	2628	2408	2319	345		2431	2348	345	2669	2420	2301				345		2428	2373		345	2682	2401	2374	345		1792	1569
346	2636	2389	2271		346	2419	2300		346	2628	2408	2319	346		2431	2348	346	2669	2420	2301				346		2428	2373		346	2682	2401	2374	346		1792	1568
347	2636	2389	2271		347	2419	2300		347	2628	2408	2319	347		2431	2348	347	2669	2420	2301				347		2428	2373		347	2682	2401	2374	347		1792	1568
348	2623	2389	2271		348	2419	2300		348	2628	2408	2319	348		2431	2348	348	2669	2420	2301				348		2428	2373		348	2682	2401	2373	348		1792	1564
349	2623	2389	2271		349	2419	2300		349	2628	2408	2304	349		2431	2348	349	2669	2420	2297				349		2428	2365		349	2682	2401	2373	349		1792	1564
350	2623	2389	2271		350	2419	2300		350	2628	2408	2304	350		2431	2348	350	2669	2420	2297				350		2428	2365		350	2682	2401	2369	350		1792	1564
351	2623	2389	2271		351	2419	2300		351	2628	2408	2304	351		2431	2348	351	2669	2420	2297				351		2428	2365		351	2682	2401	2369	351		1792	1564
352	2623	2389	2264		352	2419	2300		352	2628	2408	2304	352		2431	2344	352	2669	2420	2297				352		2428	2365		352	2682	2401	2369	352		1792	1558
353	2623	2389	2264		353	2419	2300		353	2628	2408	2304	353		2431	2344	353	2669	2420	2297				353		2428	2365		353	2682	2401	2369	353		1792	1558
354	2623	2389	2264		354	2419	2300		354	2628	2408	2304	354		2431	2344	354	2669	2420	2297				354		2428	2362		354	2682	2401	2369	354		1792	1531
355	2623	2389	2264		355	2419	2300		355	2628	2408	2304	355		2431	2344	355	2669	2420	2297				355		2428	2362		355	2682	2401	2369	355		1792	1531
356	2623	2389	2264		356	2419	2300		356	2628	2408	2304	356		2431	2344	356	2669	2420	2297				356		2428	2362		356	2682	2401	2369	356		1792	1531
357	2623	2389	2264		357	2419	2300		357	2628	2408	2304	357		2431	2344	357	2669	2420	2297				357		2428	2362		357	2682	2401	2369	357		1792	1531
358	2623	2389	2264		358	2419	2300		358	2628	2408	2304	358		2431	2344	358	2669	2420	2297				358		2428	2362		358	2682	2401	2369	358		1792	1531
359	2623	2389	2264		359	2419	2300		359	2628	2408	2304	359		2431	2344	359	2669	2420	2297				359		2428	2362		359	2682	2401	2369	359		1792	1531
360	2623	2389	2264		360	2419	2300		360	2628	2408	2304	360		2431	2344	360	2669	2420	2297				360		2428	2362		360	2682	2401	2363	360		1792	1531
361	2623	2389	2263		361	2419	2300		361	2628	2408	2302	361		2431	2344	361	2669	2420	2297				361		2428	2362		361	2682	2401	2363	361		1792	1531
362	2616	2389	2263		362	2419	2300		362	2628	2408	2302	362		2431	2343	362	2669	2420	2290				362		2428	2358		362	2682	2401	2363	362		1792	1531
363	2616	2389	2263		363	2419	2300		363	2628	2408	2302	363		2431	2343	363	2669	2420	2290				363		2428	2358		363	2682	2397	2363	363		1792	1531
364	2616	2389	2263		364	2419	2300		364	2628	2408	2302	364		2431	2343	364	2669	2420	2290				364		2428	2358		364	2682	2397	2358	364		1792	1531
365	2616	2389	2263		365	2419	2295		365	2628	2408	2302	365		2431	2343	365	2669	2420	2290				365		2428	2358		365	2682	2397	2358	365		1792	1531
366	2616	2389	2254		366	2419	2295		366	2628	2408	2302	366		2431	2342	366	2669	2420	2290				366		2428	2358		366	2682	2397	2353	366		1792	1531
367	2616	2389	2254		367	2419	2295		367	2628	2408	2302	367		2431	2342	367	2669	2420	2290				367		2428	2358		367	2682	2397	2353	367		1792	1531
368	2616	2389	2254		368	2419	2295		368	2628	2408	2297	368		2431	2342	368	2669	2420	2290				368		2428	2358		368	2682	2397	2353	368		1792	1531
369	2616	2389	2254		369	2419	2295		369	2628	2408	2297	369		2431	2342	369	2669	2420	2290				369		2428	2358		369	2682	2397	2353	369		1792	1531
370	2616	2389	2249		370	2419	2295		370	2628	2408	2297	370		2431	2342	370	2669	2420	2290				370		2428	2358		370	2682	2397	2353	370		1792	1523
371	2616	2389	2249		371	2419	2295		371	2628	2408	2297	371		2431	2342	371	2669	2420	2290				371		2428	2358		371	2682	2397	2353	371		1792	1523
372	2612	2389	2249		372	2419	2285		372	2628	2408	2297	372		2431	2342	372	2669	2420	2289				372		2428	2358		372	2682	2397	2353	372		1792	1523
373	2612	2389	2249		373	2419	2285		373	2628	2408	2297	373		2431	2342	373	2669	2420	2289				373		2428	2351		373	2682	2397	2353	373		1792	1523
374	2612	2389	2249		374	2419	2285		374	2628	2408	2297	374		2431	2342	374	2669	2418	2289				374		2428	2351		374	2682	2397	2353	374		1792	1518
375	2612	2389	2248		375	2419	2285		375	2628	2408	2297	375		2431	2342	375	2669	2418	2289				375		2428	2351		375	2682	2397	2353	375		1792	1518
376	2612	2389	2248		376	2419	2285		376	2628	2408	2297	376		2431	2342	376	2669	2418	2289				376		2428	2349		376	2682	2397	2352	376		1792	1518
377	2612	2389	2248		377	2419	2285		377	2623	2408	2296	377		2431	2337	377	2669	2418	2289				377		2428	2349		377	2682	2397	2352	377		1792	1518
378	2612	2389	2248		378	2419	2285		378	2623	2408	2296	378		2431	2337	378	2669	2418	2286				378		2428	2349		378	2682	2397	2352	378		1792	1515
379	2612	2389	2248		379	2419	2285		379	2623	2408	2296	379		2431	2337	379	2669	2418	2286				379		2428	2349		379	2682	2397	2352	379		1792	1515
380	2612	2389	2248		380	2419	2285		380	2623	2408	2291	380		2431	2337	380	2669	2418	2286				380		2428	2348		380	2682	2397	2352	380		1792	1515
381	2612	2389	2244		381	2419	2285		381	2623	2408	2291	381		2431	2337	381	2669	2418	2286				381		2428	2348		381	2682	2397	2352	381		1792	1515
382	2611	2389	2244		382	2419	2285		382	2623	2408	2291	382		2431	2335	382	2669	2418	2286				382		2428	2348		382	2682	2397	2352	382		1792	1515
383	2611	2389	2237		383	2419	2285		383	2623	2408	2291	383		2431	2335	383	2669	2418	2286				383		2428	2348		383	2682	2397	2352	383		1792	1515
384	2611	2389	2237		384	2419	2285		384	2623	2408	2283	384		2431	2335	384	2669	2418	2283				384		2428	2347		384	2682	2397	2352	384		1792	1515
385	2611	2389	2237		385	2419	2285		385	2623	2408	2283	385		2431	2335	385	2669	2418	2283				385		2428	2347		385	2682	2397	2352	385		1792	1515
386	2594	2389	2237		386	2419	2275		386	2623	2408	2282	386		2431	2335	386	2664	2418	2283				386		2428	2347		386	2682	2390	2348	386		1792	1515
387	2594	2389	2237		387	2419	2275		387	2623	2408	2282	387		2431	2335	387	2664	2418	2283				387		2428	2347		387	2682	2390	2348	387		1792	1515
388	2594	2389	2237		388	2419	2275		388	2623	2408	2282	388		2431	2331	388	2664	2418	2275				388		2428	2347		388	2682	2390	2348	388		1792	1513
389	2594	2389	2237		389	2419	2275		389	2623	2408	2282	389		2431	2331	389	2664	2418	2275				389		2428	2345		389	2682	2390	2348	389		1792	1513
390	2594	2389	2237		390	2419	2275		390	2623	2408	2282	390		2431	2331	390	2664	2418	2275				390		2428	2345		390	2682	2390	2348	390		1792	1485
391	2594	2389	2237		391	2419	2275		391	2623	2408	2282	391		2431	2331	391	2664	2418	2275				391		2428	2345		391	2682	2390	2348	391		1792	1485
392	2594	2389	2237		392	2419	2274		392	2623	2408	2282	392		2431	2331	392	2664	2418	2275				392		2428	2345		392	2682	2390	2346	392		1792	1485
393	2594	2389	2230		393	2419	2274		393	2623	2408	2282	393		2431	2331	393	2664	2418	2275				393		2428	2340		393	2682	2390	2346	393		1792	1485
394	2594	2389	2230		394	2419	2274		394	2623	2408	2282	394		2431	2331	394	2664	2418	2275				394		2428	2340		394	2682	2390	2346	394		1792	1475
395	2594	2389	2230		395	2419	2272		395	2623	2408	2282	395		2431	2331	395	2664	2418	2275				395		2428	2340		395	2682	2390	2346	395		1792	1475
396	2594	2389	2230		396	2419	2272		396	2623	2408	2281	396		2431	2330	396	2664	2418	2273				396		2428	2340		396	2682	2390	2346	396		1792	1475
397	2594	2389	2230		397	2419	2269		397	2623	2408	2281	397		2431	2330	397	2664	2418	2273				397		2428	2340		397	2682	2390	2346	397		1792	1475
398	2594	2389	2219		398	2397	2269		398	2623	2408	2277	398		2431	2330	398	2664	2418	2273				398		2428	2340		398	2682	2390	2342	398		1792	1475
399	2594	2389	2219		399	2397	2269		399	2619	2408	2277	399		2431	2330	399	2664	2418	2273				399		2428	2340		399	2682	2390	2342	399		1792	1475
400	2594	2389	2219		400	2397	2269		400	2619	2408	2277	400		2431	2328	400	2664	2418	2273				400		2428	2337		400	2682	2390	2337	400		1792	1475
401	2594	2389	2219		401	2397	2269		401	2619	2408	2271	401		2431	2328	401	2664	2418	2273				401		2428	2337		401	2682	2390	2337	401		1792	1475
402	2594	2389	2219		402	2397	2269		402	2619	2408	2271	402		2431	2323	402	2664	2418	2272				402		2428	2337		402	2682	2390	2337	402		1792	1475
403	2594	2389	2219		403	2397	2269		403	2619	2408	2271	403		2431	2323	403	2664	2418	2272				403		2428	2337		403	2682	2390	2337	403		1792	1475
404	2594	2389	2219		404	2397	2269		404	2619	2408	2271	404		2431	2323	404	2664	2418	2272				404		2428	2337		404	2682	2390	2337	404		1792	1475
405	2594	2389	2219		405	2397	2262		405	2619	2408	2271	405		2431	2323	405	2664	2418	2272				405		2428	2337		405	2682	2390	2337	405		1792	1475
406	2594	2389	2211		406	2397	2262		406	2619	2408	2271	406		2431	2323	406	2664	2418	2272				406		2428	2337		406	2682	2390	2337	406		1792	1475
407	2594	2389	2211		407	2397	2262		407	2619	2408	2271	407		2431	2323	407	2664	2418	2272				407		2428	2337		407	2682	2390	2337	407		1792	1475
408	2594	2389	2211		408	2397	2262		408	2619	2408	2264	408		2431	2323	408	2664	2418	2272				408		2428	2333		408	2682	2390	2337	408		1792	1475
409	2594	2389	2211		409	2397	2262		409	2619	2408	2264	409		2431	2323	409	2664	2418	2270				409		2428	2333		409	2682	2390	2337	409		1792	1475
410	2594	2389	2211		410	2397	2262		410	2619	2408	2264	410		2431	2323	410	2664	2418	2270				410		2428	2333		410	2682	2390	2336	410		1792	1475
411	2594	2389	2211		411	2397	2262		411	2619	2408	2264	411		2431	2323	411	2664	2418	2270				411		2428	2333		411	2682	2390	2336	411		1792	1475
412	2594	2389	2211		412	2397	2262		412	2619	2405	2264	412		2431	2323	412	2664	2418	2270				412		2428	2333		412	2682	2390	2336	412		1792	1475
413	2594	2389	2211		413	2397	2262		413	2619	2405	2258	413		2431	2323	413	2664	2418	2267				413		2428	2333		413	2682	2390	2336	413		1792	1475
414	2589	2389	2211		414	2397	2262		414	2619	2405	2258	414		2431	2323	414	2664	2418	2267				414		2428	2327		414	2682	2390	2336	414		1792	1465
415	2589	2389	2211		415	2397	2262		415	2619	2405	2258	415		2431	2323	415	2664	2418	2267				415		2428	2327		415	2682	2390	2336	415		1792	1465
416	2589	2389	2211		416	2397	2257		416	2619	2405	2258	416		2431	2323	416	2664	2418	2262				416		2428	2327		416	2682	2390	2330	416		1792	1465
417	2589	2389	2211		417	2397	2257		417	2619	2405	2258	417		2431	2322	417	2664	2418	2262				417		2428	2327		417	2682	2390	2330	417		1792	1465
418	2589	2389	2211		418	2397	2257		418	2619	2405	2249	418		2431	2320	418	2664	2418	2262				418		2428	2327		418	2682	2390	2330	418		1792	1465
419	2589	2389	2211		419	2397	2257		419	2619	2405	2249	419		2431	2320	419	2647	2418	2262				419		2428	2327		419	2682	2390	2330	419		1792	1465
420	2589	2389	2211		420	2397	2257		420	2619	2405	2249	420		2431	2320	420	2647	2418	2262				420		2428	2324		420	2682	2390	2329	420		1792	1465
421	2589	2389	2209		421	2397	2257		421	2619	2405	2249	421		2431	2318	421	2647	2418	2262				421		2428	2324		421	2682	2390	2329	421		1792	1465
422	2589	2389	2205		422	2397	2257		422	2619	2405	2249	422		2431	2318	422	2647	2418	2262				422		2428	2324		422	2682	2387	2325	422		1792	1465
423	2589	2389	2205		423	2397	2257		423	2619	2405	2249	423		2431	2318	423	2647	2418	2262				423		2428	2324		423	2682	2387	2325	423		1792	1465
424	2589	2389	2205		424	2397	2257		424	2619	2405	2249	424		2431	2318	424	2647	2418	2262				424		2428	2324		424	2682	2387	2325	424		1792	1465
425	2589	2389	2205		425	2397	2257		425	2619	2405	2249	425		2431	2316	425	2625	2418	2262				425		2428	2324		425	2682	2387	2325	425		1792	1465
426	2589	2389	2205		426	2397	2257		426	2619	2405	2249	426		2431	2316	426	2625	2418	2260				426		2428	2324		426	2682	2387	2325	426		1792	1465
427	2589	2389	2205		427	2397	2252		427	2619	2405	2249	427		2431	2316	427	2625	2418	2260				427		2428	2324		427	2682	2387	2325	427		1792	1465
428	2589	2389	2205		428	2397	2252		428	2619	2405	2247	428		2431	2311	428	2625	2418	2260				428		2428	2324		428	2682	2387	2325	428		1792	1459
429	2589	2389	2205		429	2397	2252		429	2619	2405	2247	429		2431	2311	429	2625	2401	2256				429		2428	2320		429	2682	2387	2325	429		1792	1459
430	2589	2389	2204		430	2397	2248		430	2619	2405	2247	430		2431	2311	430	2625	2401	2256				430		2428	2320		430	2682	2387	2325	430		1792	1459
431	2589	2389	2204		431	2397	2248		431	2619	2405	2247	431		2431	2311	431	2625	2401	2256				431		2428	2320		431	2682	2387	2325	431		1792	1459
432	2589	2389	2204		432	2397	2248		432	2619	2405	2247	432		2431	2311	432	2625	2401	2256				432		2428	2320		432	2682	2387	2325	432		1792	1459
433	2589	2389	2204		433	2397	2248		433	2619	2405	2247	433		2431	2311	433	2625	2401	2252				433		2428	2320		433	2682	2387	2325	433		1792	1459
434	2589	2389	2204		434	2397	2248		434	2619	2405	2247	434		2431	2311	434	2625	2401	2252				434		2428	2320		434	2682	2387	2324	434		1792	1459
435	2589	2389	2204		435	2397	2248		435	2619	2405	2247	435		2431	2311	435	2625	2401	2252				435		2428	2320		435	2682	2387	2324	435		1792	1459
436	2589	2389	2204		436	2397	2242		436	2619	2405	2247	436		2410	2311	436	2625	2401	2252				436		2428	2320		436	2682	2387	2324	436		1792	1459
437	2589	2389	2204		437	2397	2242		437	2619	2405	2247	437		2410	2311	437	2625	2401	2252				437		2428	2318		437	2682	2387	2324	437		1792	1459
438	2589	2389	2200		438	2397	2242		438	2619	2405	2240	438		2410	2310	438	2625	2401	2252				438		2428	2318		438	2682	2387	2324	438		1792	1459
439	2589	2389	2200		439	2397	2242		439	2619	2405	2240	439		2410	2310	439	2625	2401	2252				439		2428	2318		439	2682	2387	2324	439		1792	1459
440	2589	2389	2200		440	2397	2237		440	2619	2405	2240	440		2410	2310	440	2625	2401	2252				440		2428	2318		440	2682	2387	2324	440		1792	1459
441	2589	2389	2200		441	2397	2237		441	2619	2405	2240	441		2410	2303	441	2625	2401	2250				441		2428	2312		441	2682	2387	2324	441		1792	1459
442	2589	2389	2200		442	2397	2237		442	2619	2405	2240	442		2410	2303	442	2625	2401	2247				442		2428	2312		442	2682	2387	2324	442		1792	1459
443	2589	2389	2191		443	2397	2237		443	2619	2405	2240	443		2410	2303	443	2625	2401	2247				443		2428	2312		443	2682	2387	2324	443		1792	1459
444	2589	2389	2191		444	2397	2237		444	2619	2405	2239	444		2410	2303	444	2625	2401	2247				444		2428	2308		444	2682	2387	2324	444		1792	1459
445	2589	2389	1199		445	2397	2219		445	2619	2405	2239	445		2410	2303	445	2625	2401	2247				445		2428	2308		445	2682	2387	2324	445		1792	1459
446	2589	2389	1199		446	2397	2219		446	2619	2405	2239	446		2410	2303	446	2625	2401	2247				446		2428	2308		446	2682	2387	2324	446		1792	1458
447	2589	2389	1199		447	2397	2219		447	2619	2405	2239	447		2410	2303	447	2625	2401	2247				447		2428	2308		447	2682	2387	2324	447		1792	1458
448	2589	2389	1199		448	2397	2219		448	2619	2405	2239	448		2410	2303	448	2625	2401	2247				448		2428	2300		448	2682	2387	2324	448		1792	1458
449	2589	2389	1199		449	2397	2219		449	2619	2405	2239	449		2410	2303	449	2625	2401	2244				449		2428	2300		449	2682	2387	2324	449		1792	1458
450	2589	2389	1199		450	2397	2219		450	2619	2405	2239	450		2410	2303	450	2625	2401	2244				450		2428	2300		450	2682	2387	2319	450		1792	1451
451	2589	2389	1199		451	2397	2219		451	2619	2405	2239	451		2410	2303	451	2625	2401	2244				451		2428	2300		451	2682	2387	2319	451		1792	1451
452	2589	2389	1199		452	2397	2219		452	2619	2405	2239	452		2410	2303	452	2625	2401	2244				452		2428	2300		452	2682	2387	2319	452		1792	1451
453	2589	2389	1199		453	2397	2219		453	2619	2405	2239	453		2410	2300	453	2625	2401	2241				453		2428	2300		453	2682	2387	2319	453		1792	1451
454	2589	2389	1199		454	2397	2219		454	2619	2405	2235	454		2410	2300	454	2625	2401	2241				454		2428	2292		454	2682	2387	2319	454		1792	1451
455	2589	2389	1181		455	2397	2219		455	2619	2405	2235	455		2410	2300	455	2625	2401	2241				455		2428	2292		455	2682	2387	2319	455		1792	1451
456	2589	2389	1181		456	2397	2219		456	2619	2405	2235	456		2410	2300	456	2625	2401	2236				456		2428	2292		456	2682	2387	2319	456		1792	1451
457	2589	2389	1181		457	2397	2219		457	2619	2405	2219	457		2410	2300	457	2625	2401	2236				457		2428	2292		457	2682	2387	2319	457		1792	1451
458	2589	2389	1181		458	2397	2219		458	2619	2405	2219	458		2410	2300	458	2625	2401	2236				458		2428	2292		458	2682	2387	2319	458		1792	1451
459	2589	2389	1181		459	2397	2219		459	2619	2405	2219	459		2410	2300	459	2625	2401	2236				459		2428	2292		459	2682	2387	2319	459		1792	1451
460	2589	2389	1181		460	2397	2219		460	2619	2405	2214	460		2410	2300	460	2625	2401	2236				460		2428	2292		460	2682	2387	2319	460		1792	1451
461	2589	2389	1181		461	2397	2219		461	2619	2405	2214	461		2410	2299	461	2625	2401	2236				461		2428	2292		461	2682	2387	2319	461		1792	1451
462	2589	2389	1181		462	2397	2219		462	2619	2405	2214	462		2410	2293	462	2625	2401	2236				462		2428	2292		462	2682	2387	2319	462		1792	1451
463	2589	2389	1180		463	2397	2219		463	2619	2405	2214	463		2410	2293	463	2625	2401	2236				463		2428	2292		463	2682	2387	2319	463		1792	1451
464	2589	2389	1180		464	2397	2219		464	2619	2405	2214	464		2410	2293	464	2625	2401	2236				464		2428	2284		464	2682	2387	2319	464		1792	1451
465	2589	2389	1180		465	2397	2219		465	2619	2405	2214	465		2410	2293	465	2625	2401	2227				465		2428	2284		465	2682	2387	2319	465		1792	1451
466	2589	2389	1180		466	2397	2219		466	2619	2405	2214	466		2410	2293	466	2625	2401	2227				466		2428	2284		466	2682	2387	2319	466		1792	1451
467	2589	2389	1180		467	2397	2219		467	2619	2405	2214	467		2410	2293	467	2625	2401	2227				467		2428	2284		467	2682	2387	2319	467		1792	1451
468	2589	2389	1180		468	2397	2219		468	2619	2405	2214	468		2410	2293	468	2625	2401	2227				468		2428	2284		468	2682	2387	2309	468		1792	1451
469	2589	2389	1180		469	2397	2219		469	2619	2405	2214	469		2410	2292	469	2625	2401	2227				469		2428	2282		469	2682	2387	2309	469		1792	1451
470	2589	2389	1180		470	2397	2219		470	2619	2405	2214	470		2410	2292	470	2625	2401	2227				470		2428	2282		470	2682	2387	2309	470		1792	1450
471	2589	2389	1175		471	2397	2216		471	2619	2405	2214	471		2410	2292	471	2625	2401	2227				471		2428	2282		471	2682	2387	2309	471		1792	1450
472	2589	2389	1175		472	2397	2216		472	2619	2405	2205	472		2410	2292	472	2625	2401	2227				472		2428	2282		472	2682	2387	2309	472		1792	1450
473	2589	2389	1175		473	2397	2216		473	2619	2405	2205	473		2410	2292	473	2625	2401	2223				473		2428	2269		473	2682	2387	2309	473		1792	1450
474	2589	2389	1175		474	2397	2216		474	2619	2405	2205	474		2410	2292	474	2625	2401	2223				474		2428	2269		474	2682	2387	2309	474		1792	1450
475	2589	2389	1175		475	2397	2216		475	2619	2405	2205	475		2410	2292	475	2625	2401	2223				475		2428	2269		475	2682	2387	2309	475		1792	1450
476	2589	2389	1173		476	2397	2212		476	2619	2405	2205	476		2410	2292	476	2625	2401	2223				476		2428	2269		476	2682	2387	2309	476		1792	1450
477	2589	2389	1173		477	2397	2212		477	2619	2405	2205	477		2410	2292	477	2625	2401	2223				477		2428	2269		477	2682	2387	2309	477		1792	1450
478	2589	2389	1173		478	2397	2207		478	2619	2405	2205	478		2410	2292	478	2625	2401	2223				478		2428	2269		478	2682	2387	2309	478		1792	1450
479	2589	2389	1173		479	2397	2207		479	2619	2405	2205	479		2410	2292	479	2625	2401	2223				479		2428	2269		479	2682	2387	2309	479		1792	1450
480	2589	2389	1173		480	2397	2203		480	2619	2405	2205	480		2410	2292	480	2625	2401	2223				480		2428	2269		480	2682	2387	2308	480		1792	1450
481	2589	2389	1173		481	2397	2203		481	2619	2405	2205	481		2410	2292	481	2625	2401	2221				481		2428	2269		481	2682	2387	2308	481		1792	1450
482	2589	2389	1170		482	2397	2203		482	2619	2405	2205	482		2410	2292	482	2601	2401	2221				482		2428	2269		482	2682	2387	2308	482		1792	1450
483	2589	2389	1170		483	2397	2203		483	2619	2405	2205	483		2410	2292	483	2601	2401	2221				483		2428	2269		483	2682	2387	2308	483		1792	1450
484	2589	2389	1170		484	2397	2203		484	2619	2405	2196	484		2410	2292	484	2601	2401	2219				484		2428	2269		484	2682	2387	2308	484		1792	1450
485	2589	2389	1160		485	2397	2203		485	2619	2405	2196	485		2410	2287	485	2601	2401	2219				485		2428	2269		485	2682	2387	2308	485		1792	1450
486	2589	2389	1160		486	2397	2203		486	2619	2405	2196	486		2410	2287	486	2601	2401	2219				486		2428	2269		486	2682	2387	2308	486		1792	1450
487	2589	2389	1160		487	2397	2200		487	2619	2405	2196	487		2410	2287	487	2601	2401	2219				487		2428	2269		487	2682	2387	2308	487		1792	1450
488	2589	2389	1160		488	2397	2200		488	2619	2405	2196	488		2410	2287	488	2601	2401	2219				488		2428	2269		488	2682	2387	2303	488		1792	1445
489	2589	2389	1160		489	2397	2200		489	2619	2405	2196	489		2410	2287	489	2601	2401	2212				489		2428	2269		489	2682	2387	2303	489		1792	1445
490	2589	2389	1160		490	2397	2200		490	2619	2405	2196	490		2410	2287	490	2601	2401	2212				490		2428	2269		490	2682	2387	2303	490		1792	1445
491	2589	2389	1160		491	2397	2200		491	2619	2405	2196	491		2410	2287	491	2601	2401	2212				491		2428	2269		491	2682	2387	2303	491		1792	1445
492	2589	2389	1160		492	2397	2200		492	2619	2405	2196	492		2410	2287	492	2601	2401	2212				492		2428	2269		492	2682	2387	2296	492		1792	1445
493	2589	2389	1160		493	2397	2200		493	2619	2405	2196	493		2410	2287	493	2601	2401	2212				493		2428	2269		493	2682	2387	2296	493		1792	1445
494	2589	2389	1160		494	2397	2200		494	2619	2405	2196	494		2410	2279	494	2601	2401	2212				494		2428	2269		494	2682	2387	2296	494		1792	1445
495	2589	2389	1160		495	2397	2200		495	2619	2405	2196	495		2410	2279	495	2601	2401	2212				495		2428	2269		495	2682	2387	2296	495		1792	1445
496	2589	2389	1160		496	2397	2200		496	2619	2405	2196	496		2410	2273	496	2601	2401	2212				496		2428	2269		496	2682	2387	2296	496		1792	1443
497	2589	2389	1160		497	2397	2187		497	2619	2405	2196	497		2410	2273	497	2601	2401	2212				497		2428	2263		497	2682	2387	2296	497		1792	1443
498	2589	2389	1160		498	2397	2187		498	2619	2405	2196	498		2410	2273	498	2601	2401	2212				498		2428	2263		498	2682	2387	2292	498		1792	1443
499	2589	2389	1160		499	2397	2187		499	2619	2405	2196	499		2410	2273	499	2601	2401	2212				499		2428	2263		499	2682	2387	2292	499		1792	1443
500	2589	2389	1160		500	2397	2187		500	2619	2405	2196	500		2410	2273	500	2601	2401	2212				500		2428	2263		500	2682	2387	2292	500		1792	1443
501	2589	2389	1154		501	2397	2187		501	2619	2405	2196	501		2410	2273	501	2601	2401	2208				501		2428	2263		501	2682	2387	2292	501		1792	1443
502	2589	2389	1154		502	2397	2187		502	2619	2405	2196	502		2410	2273	502	2601	2401	2208				502		2428	2263		502	2682	2387	2292	502		1792	1443
503	2589	2389	1154		503	2397	2187		503	2619	2405	2196	503		2410	2273	503	2601	2401	2208				503		2428	2263		503	2682	2387	2292	503		1792	1443
504	2589	2389	1154		504	2397	2187		504	2619	2405	2196	504		2410	2273	504	2601	2401	2208				504		2428	2263		504	2682	2387	2292	504		1792	1443
505	2589	2389	1154		505	2397	2187		505	2619	2405	2195	505		2410	2273	505	2601	2401	2208				505		2428	2262		505	2682	2387	2292	505		1792	1443
506	2589	2389	1154		506	2397	2187		506	2619	2405	2195	506		2410	2273	506	2601	2401	2208				506		2428	2262		506	2682	2387	2290	506		1792	1441
507	2589	2389	1154		507	2397	2187		507	2619	2405	2195	507		2410	2273	507	2601	2401	2208				507		2428	2262		507	2682	2387	2290	507		1792	1441
508	2589	2389	1154		508	2397	2185		508	2619	2405	2191	508		2410	2273	508	2601	2401	2208				508		2428	2262		508	2682	2387	2290	508		1792	1441
509	2589	2389	1154		509	2397	2185		509	2619	2405	2191	509		2410	2273	509	2601	2401	2206				509		2428	2262		509	2682	2387	2290	509		1792	1441
510	2589	2389	1154		510	2397	2185		510	2619	2405	2184	510		2410	2273	510	2587	2401	2206				510		2428	2258		510	2682	2387	2284	510		1792	1441
511	2589	2389	1154		511	2397	2176		511	2619	2405	2184	511		2410	2273	511	2587	2401	2206				511		2428	2258		511	2682	2387	2284	511		1792	1441
512	2589	2389	1140		512	2397	2176		512	2619	2405	2184	512		2410	2273	512	2587	2401	2206				512		2428	2258		512	2682	2387	2284	512		1792	1441
513	2589	2389	1140		513	2397	2176		513	2619	2405	2184	513		2410	2273	513	2587	2401	2206				513		2428	2258		513	2682	2387	2284	513		1792	1441
514	2589	2389	1140		514	2397	2176		514	2619	2405	2184	514		2410	2273	514	2587	2401	2206				514		2428	2258		514	2682	2387	2284	514		1792	1435
515	2589	2389	1140		515	2397	2176		515	2619	2405	2184	515		2410	2273	515	2587	2401	2206				515		2428	2258		515	2682	2387	2284	515		1792	1435
516	2589	2389	1140		516	2397	2176		516	2619	2405	2184	516		2410	2265	516	2587	2401	2202				516		2428	2257		516	2682	2387	2284	516		1792	1435
517	2589	2389	1140		517	2397	2176		517	2619	2405	2179	517		2410	2265	517	2587	2401	2202				517		2428	2257		517	2682	2387	2284	517		1792	1435
518	2589	2389	1140		518	2397	2176		518	2619	2405	2179	518		2410	2265	518	2587	2401	2202				518		2428	2257		518	2682	2387	2284	518		1792	1435
519	2589	2389	1140		519	2397	2176		519	2619	2405	2179	519		2410	2265	519	2587	2401	2202				519		2428	2257		519	2682	2387	2284	519		1792	1435
520	2589	2389	1140		520	2397	2176		520	2619	2405	2179	520		2410	2265	520	2587	2401	2199				520		2428	2257		520	2682	2387	2284	520		1792	1435
521	2574	2389	1140		521	2397	2173		521	2619	2405	2179	521		2410	2265	521	2587	2401	2199				521		2428	2256		521	2682	2387	2284	521		1792	1435
522	2574	2389	1140		522	2397	2173		522	2619	2405	2179	522		2410	2265	522	2587	2401	2199				522		2428	2256		522	2682	2387	2284	522		1792	1430
523	2574	2389	1140		523	2397	2173		523	2619	2405	2179	523		2410	2265	523	2587	2401	2199				523		2428	2256		523	2682	2387	2284	523		1792	1430
524	2574	2389	1140		524	2397	2173		524	2619	2405	2177	524		2410	2265	524	2587	2401	2199				524		2428	2256		524	2682	2387	2284	524		1792	1430
525	2574	2389	1140		525	2397	2173		525	2619	2405	2177	525		2410	2265	525	2587	2401	2199				525		2428	2256		525	2682	2387	2284	525		1792	1430
526	2574	2389	1140		526	2397	2168		526	2619	2388	2177	526		2410	2255	526	2587	2401	2199				526		2428	2256		526	2682	2387	2284	526		1792	1422
527	2574	2389	1135		527	2397	2168		527	2619	2388	2177	527		2410	2255	527	2587	2401	2199				527		2428	2256		527	2682	2387	2284	527		1792	1422
528	2574	2389	1135		528	2397	2168		528	2619	2388	2174	528		2410	2255	528	2587	2401	2199				528		2428	2256		528	2682	2387	2278	528		1792	1422
529	2574	2389	1135		529	2397	2168		529	2619	2388	2174	529		2410	2255	529	2587	2401	2191				529		2428	2252		529	2682	2387	2278	529		1792	1422
530	2574	2389	1135		530	2397	2168		530	2619	2388	2174	530		2410	2255	530	2587	2401	2191				530		2428	2252		530	2682	2387	2278	530		1792	1422
531	2574	2389	1134		531	2397	2168		531	2619	2388	2174	531		2410	2255	531	2587	2401	2191				531		2428	2252		531	2682	2387	2278	531		1792	1422
532	2574	2389	1134		532	2397	2163		532	2619	2388	2174	532		2410	2255	532	2587	2373	2191				532		2428	2252		532	2682	2387	2278	532		1792	1395
533	2574	2389	1134		533	2397	2163		533	2619	2388	2174	533		2410	2255	533	2587	2373	2191				533		2428	2248		533	2682	2387	2278	533		1792	1395
534	2574	2389	1134		534	2397	2163		534	2619	2388	2174	534		2410	2255	534	2587	2373	2184				534		2428	2248		534	2682	2387	2278	534		1792	1395
535	2574	2389	1134		535	2397	2163		535	2619	2388	2174	535		2410	2255	535	2587	2373	2184				535		2428	2248		535	2682	2387	2278	535		1792	1395
536	2574	2389	1126		536	2397	2163		536	2619	2388	2173	536		2410	2255	536	2587	2373	2184				536		2428	2248		536	2682	2387	2278	536		1792	1395
537	2574	2389	1126		537	2397	2156		537	2619	2388	2173	537		2410	2255	537	2587	2373	2184				537		2428	2248		537	2682	2387	2278	537		1792	1395
538	2574	2389	1126		538	2397	2156		538	2619	2388	2173	538		2410	2255	538	2587	2373	2184				538		2399	2248		538	2682	2387	2277	538		1792	1394
539	2574	2389	1126		539	2397	2156		539	2619	2388	2173	539		2410	2255	539	2587	2373	2184				539		2399	2248		539	2682	2387	2277	539		1792	1394
540	2574	2389	1126		540	2397	2151		540	2619	2388	2165	540		2410	2255	540	2587	2373	2184				540		2399	2248		540	2682	2387	2277	540		1792	1394
541	2574	2389	1126		541	2397	2151		541	2619	2388	2165	541		2410	2255	541	2587	2373	2184				541		2399	2248		541	2682	2387	2277	541		1792	1394
542	2574	2389	1126		542	2397	2151		542	2619	2388	2157	542		2410	2255	542	2587	2373	2184				542		2399	2235		542	2682	2387	2277	542		1792	1394
543	2574	2389	1116		543	2397	2151		543	2619	2388	2157	543		2410	2255	543	2587	2373	2184				543		2399	2235		543	2682	2387	2277	543		1792	1394
544	2574	2389	1116		544	2397	2151		544	2619	2388	2157	544		2410	2255	544	2587	2373	2184				544		2399	2235		544	2682	2387	2277	544		1792	1388
545	2574	2389	1116		545	2397	2141		545	2619	2388	2157	545		2410	2255	545	2587	2373	2184				545		2399	2231		545	2682	2387	2277	545		1792	1388
546	2574	2389	1116		546	2397	2141		546	2619	2388	2157	546		2410	2255	546	2587	2373	2184				546		2399	2231		546	2682	2387	2277	546		1792	1388
547	2574	2389	1116		547	2397	2141		547	2619	2388	2157	547		2410	2255	547	2587	2373	2184				547		2399	2231		547	2682	2387	2277	547		1792	1388
548	2574	2389	1116		548	2397	2141		548	2619	2388	2157	548		2410	2252	548	2587	2373	2183				548		2399	2231		548	2682	2387	2277	548		1792	1388
549	2574	2389	1116		549	2397	2141		549	2619	2388	2157	549		2410	2252	549	2587	2373	2183				549		2399	2231		549	2682	2384	2277	549		1792	1388
550	2574	2389	1116		550	2397	2141		550	2619	2388	2157	550		2410	2250	550	2587	2373	2183				550		2399	2231		550	2682	2384	2277	550		1792	1388
551	2574	2389	1111		551	2397	2141		551	2619	2388	2157	551		2410	2250	551	2587	2373	2183				551		2399	2231		551	2682	2384	2277	551		1792	1388
552	2574	2389	1111		552	2397	2141		552	2619	2388	2157	552		2410	2244	552	2587	2373	2183				552		2399	2231		552	2682	2384	2277	552		1792	1388
553	2574	2389	1111		553	2397	2141		553	2619	2388	2157	553		2410	2244	553	2587	2373	2178				553		2399	2231		553	2682	2384	2277	553		1792	1388
554	2574	2389	1111		554	2397	2141		554	2619	2388	2144	554		2410	2244	554	2587	2373	2178				554		2399	2229		554	2682	2384	2276	554		1792	1388
555	2574	2389	1111		555	2397	2141		555	2619	2388	2144	555		2410	2244	555	2587	2373	2178				555		2399	2229		555	2682	2384	2276	555		1792	1388
556	2574	2389	1111		556	2397	2141		556	2619	2388	2144	556		2410	2243	556	2587	2373	2178				556		2399	2228		556	2682	2364	2276	556		1792	1388
557	2568	2389	1111		557	2397	2141		557	2619	2388	2144	557		2410	2243	557	2587	2373	2178				557		2399	2228		557	2682	2364	2276	557		1792	1388
558	2568	2389	1111		558	2397	2132		558	2619	2388	2144	558		2410	2243	558	2587	2373	2178				558		2399	2228		558	2682	2364	2269	558		1792	1384
559	2568	2389	1111		559	2397	2132		559	2619	2388	2144	559		2410	2243	559	2587	2373	2178				559		2399	2228		559	2682	2364	2269	559		1792	1384
560	2568	2389	1106		560	2397	2132		560	2619	2388	2144	560		2410	2243	560	2587	2373	2178				560		2399	2226		560	2682	2364	2269	560		1792	1384
561	2568	2389	1106		561	2397	2132		561	2619	2388	2144	561		2410	2237	561	2587	2373	2174				561		2399	2226		561	2682	2364	2269	561		1792	1384
562	2568	2389	1106		562	2397	2132		562	2619	2388	2144	562		2410	2237	562	2587	2373	2174				562		2399	2226		562	2682	2364	2269	562		1792	1384
563	2568	2389	1106		563	2397	2132		563	2619	2388	2144	563		2410	2237	563	2587	2373	2174				563		2399	2226		563	2682	2364	2269	563		1792	1384
564	2568	2389	1106		564	2397	2132		564	2619	2388	2144	564		2410	2237	564	2587	2373	2174				564		2399	2226		564	2682	2364	2269	564		1792	1370
565	2568	2389	1106		565	2397	2132		565	2619	2388	2144	565		2410	2237	565	2587	2373	2172				565		2399	2225		565	2682	2364	2269	565		1792	1370
566	2568	2389	1106		566	2397	2129		566	2619	2388	2135	566		2410	2237	566	2587	2373	2172				566		2399	2225		566	2682	2364	2269	566		1792	1370
567	2568	2389	1106		567	2397	2129		567	2619	2388	2135	567		2410	2237	567	2587	2373	2172				567		2399	2225		567	2682	2364	2269	567		1792	1370
568	2568	2389	1106		568	2397	2129		568	2619	2388	2135	568		2410	2223	568	2587	2373	2167				568		2399	2225		568	2682	2364	2269	568		1792	1370
569	2567	2389	1106		569	2397	2129		569	2619	2388	2135	569		2410	2223	569	2587	2373	2167				569		2399	2225		569	2682	2364	2269	569		1792	1370
570	2567	2389	1105		570	2397	2129		570	2619	2388	2135	570		2410	2223	570	2587	2373	2167				570		2399	2225		570	2682	2364	2269	570		1792	1370
571	2567	2389	1105		571	2397	2122		571	2619	2388	2135	571		2410	2223	571	2587	2373	2167				571		2399	2225		571	2682	2364	2269	571		1792	1370
572	2567	2389	1105		572	2397	2122		572	2619	2388	2135	572		2410	2223	572	2587	2373	2167				572		2399	2225		572	2682	2364	2269	572		1792	1370
573	2567	2389	1105		573	2397	2122		573	2619	2388	2135	573		2410	2223	573	2587	2373	2167				573		2399	2225		573	2682	2364	2269	573		1792	1370
574	2567	2389	1105		574	2397	2122		574	2619	2388	2135	574		2410	2223	574	2587	2373	2158				574		2399	2225		574	2682	2364	2269	574		1792	1366
575	2567	2389	1105		575	2397	2122		575	2619	2388	2135	575		2410	2223	575	2587	2373	2158				575		2399	2225		575	2682	2364	2269	575		1792	1366
576	2567	2389	1105		576	2397	2122		576	2619	2388	2135	576		2410	2223	576	2587	2373	2158				576		2399	2220		576	2682	2364	2257	576		1792	1366
577	2567	2389	1105		577	2397	2122		577	2619	2388	2135	577		2410	2223	577	2587	2373	2158				577		2399	2220		577	2682	2364	2257	577		1792	1366
578	2567	2389	1105		578	2397	2122		578	2619	2388	2135	578		2410	2223	578	2587	2373	2158				578		2399	2219		578	2682	2364	2257	578		1792	1366
579	2560	2389	1105		579	2397	2122		579	2619	2388	2135	579		2410	2223	579	2587	2373	2158				579		2399	2219		579	2682	2364	2257	579		1792	1366
580	2560	2389	1105		580	2397	2114		580	2619	2388	2135	580		2410	2221	580	2587	2373	2158				580		2399	2219		580	2682	2364	2257	580		1792	1366
581	2560	2389	1102		581	2397	2114		581	2619	2388	2135	581		2410	2221	581	2587	2373	2158				581		2399	2210		581	2682	2364	2257	581		1792	1366
582	2560	2389	1102		582	2397	2114		582	2619	2388	2126	582		2410	2221	582	2587	2373	2158				582		2399	2210		582	2682	2364	2257	582		1792	1366
583	2560	2389	1094		583	2397	2114		583	2619	2388	2126	583		2410	2221	583	2587	2373	2158				583		2399	2210		583	2682	2364	2257	583		1792	1366
584	2560	2389	1094		584	2397	2114		584	2619	2388	2126	584		2410	2221	584	2587	2373	2154				584		2399	2210		584	2682	2364	2257	584		1792	1366
585	2560	2389	1094		585	2397	2114		585	2619	2388	2126	585		2410	2221	585	2587	2373	2154				585		2399	2199		585	2682	2364	2257	585		1792	1366
586	2560	2389	1094		586	2397	2114		586	2619	2388	2126	586		2410	2221	586	2587	2373	2154				586		2399	2199		586	2682	2364	2257	586		1792	1366
587	2560	2389	1094		587	2397	2114		587	2619	2388	2126	587		2410	2221	587	2587	2373	2154				587		2399	2199		587	2682	2364	2257	587		1792	1366
588	2560	2389	1094		588	2397	2114		588	2619	2388	2126	588		2410	2221	588	2587	2373	2154				588		2399	2199		588	2682	2364	2256	588		1792	1366
589	2560	2389	1094		589	2397	2114		589	2619	2388	2126	589		2410	2221	589	2587	2373	2154				589		2399	2196		589	2682	2364	2256	589		1792	1366
590	2560	2389	1094		590	2397	2114		590	2619	2388	2126	590		2410	2221	590	2587	2373	2150				590		2399	2196		590	2682	2364	2256	590		1792	1366
591	2560	2389	1094		591	2397	2114		591	2619	2388	2126	591		2410	2221	591	2587	2373	2150				591		2399	2196		591	2682	2364	2256	591		1792	1366
592	2560	2389	1094		592	2397	2114		592	2619	2388	2119	592		2410	2220	592	2587	2373	2150				592		2399	2190		592	2682	2364	2256	592		1792	1366
593	2560	2389	1094		593	2397	2114		593	2619	2388	2119	593		2410	2220	593	2587	2373	2150				593		2399	2190		593	2682	2364	2256	593		1792	1366
594	2560	2389	1094		594	2397	2114		594	2619	2388	2119	594		2410	2220	594	2587	2373	2150				594		2399	2190		594	2682	2364	2256	594		1792	1353
595	2560	2389	1094		595	2397	2114		595	2619	2388	2119	595		2410	2220	595	2587	2373	2150				595		2399	2190		595	2682	2364	2256	595		1792	1353
596	2560	2389	1087		596	2397	2114		596	2619	2388	2119	596		2410	2220	596	2587	2373	2150				596		2399	2190		596	2682	2364	2256	596		1792	1353
597	2560	2389	1087		597	2397	2114		597	2619	2388	2119	597		2410	2219	597	2587	2373	2150				597		2399	2190		597	2682	2364	2256	597		1792	1353
598	2560	2389	1087		598	2397	2097		598	2619	2388	2119	598		2410	2219	598	2587	2373	2150				598		2399	2190		598	2682	2364	2256	598		1792	1353
599	2560	2389	1087		599	2397	2097		599	2619	2388	2119	599		2410	2219	599	2587	2373	2150				599		2399	2190		599	2682	2364	2256	599		1792	1353
600	2560	2389	1087		600	2397	2097		600	2619	2388	2119	600		2410	2218	600	2587	2373	2150				600		2399	2190		600	2682	2364	2243	600		1792	1345
601	2560	2389	1087		601	2397	2097		601	2619	2388	2118	601		2410	2218	601	2587	2373	2150				601		2399	2190		601	2682	2364	2243	601		1792	1345
602	2560	2389	1087		602	2397	2097		602	2619	2388	2118	602		2410	2218	602	2587	2373	2150				602		2399	2189		602	2682	2364	2243	602		1792	1345
603	2560	2389	1087		603	2397	2097		603	2619	2388	2118	603		2410	2218	603	2587	2373	2150				603		2399	2189		603	2682	2364	2243	603		1792	1345
604	2560	2389	1087		604	2397	2097		604	2619	2388	2118	604		2410	2218	604	2587	2373	2150				604		2399	2189		604	2682	2364	2243	604		1792	1345
605	2560	2389	1087		605	2397	2097		605	2619	2388	2118	605		2410	2215	605	2587	2373	2150				605		2399	2186		605	2682	2364	2243	605		1792	1345
606	2560	2389	1087		606	2397	2097		606	2619	2388	2111	606		2410	2215	606	2587	2373	2144				606		2399	2177		606	2682	2364	2243	606		1792	1345
607	2560	2389	1077		607	2397	2097		607	2619	2388	2111	607		2410	2215	607	2587	2373	2144				607		2399	2177		607	2682	2364	2243	607		1792	1345
608	2560	2389	1077		608	2397	2092		608	2619	2388	2111	608		2410	2215	608	2587	2373	2140				608		2399	2173		608	2682	2364	2243	608		1792	1345
609	2560	2389	1077		609	2397	2092		609	2619	2388	2111	609		2410	2213	609	2587	2373	2140				609		2399	2173		609	2682	2364	2243	609		1792	1345
610	2560	2389	1077		610	2397	2092		610	2619	2388	2111	610		2410	2213	610	2587	2373	2139				610		2399	2173		610	2682	2364	2243	610		1792	1345
611	2560	2389	1077		611	2397	2092		611	2619	2388	2111	611		2410	2213	611	2587	2373	2139				611		2399	2173		611	2682	2364	2243	611		1792	1345
612	2560	2389	1070		612	2397	2092		612	2619	2388	2111	612		2410	2213	612	2587	2373	2139				612		2399	2173		612	2682	2364	2243	612		1792	1340
613	2556	2389	1070		613	2397	2092		613	2619	2388	2106	613		2410	2212	613	2587	2373	2138				613		2399	2173		613	2682	2364	2243	613		1792	1340
614	2556	2389	1070		614	2397	2092		614	2619	2388	2106	614		2410	2212	614	2587	2373	2138				614		2399	2173		614	2682	2364	2243	614		1792	1340
615	2556	2389	1070		615	2397	2092		615	2619	2388	2106	615		2410	2212	615	2587	2373	2138				615		2399	2173		615	2682	2364	2243	615		1792	1340
616	2556	2389	1070		616	2397	2092		616	2619	2388	2106	616		2410	2212	616	2587	2373	2131				616		2399	2173		616	2682	2364	2243	616		1792	1340
617	2556	2389	1069		617	2397	2092		617	2619	2388	2106	617		2410	2212	617	2587	2373	2131				617		2399	2168		617	2682	2364	2243	617		1792	1340
618	2556	2389	1069		618	2397	2092		618	2619	2388	2106	618		2410	2205	618	2587	2373	2131				618		2399	2168		618	2682	2364	2243	618		1792	1340
619	2556	2389	1069		619	2397	2092		619	2613	2388	2106	619		2410	2205	619	2587	2373	2131				619		2399	2168		619	2682	2364	2243	619		1792	1340
620	2556	2389	1069		620	2397	2092		620	2613	2388	2106	620		2410	2205	620	2587	2373	2131				620		2399	2168		620	2682	2364	2243	620		1792	1340
621	2556	2389	1069		621	2397	2089		621	2613	2388	2106	621		2410	2205	621	2587	2373	2131				621		2399	2168		621	2682	2364	2243	621		1792	1340
622	2556	2389	1069		622	2397	2089		622	2613	2388	2106	622		2410	2205	622	2587	2373	2131				622		2399	2168		622	2682	2364	2237	622		1792	1340
623	2556	2389	1068		623	2397	2087		623	2613	2388	2106	623		2410	2205	623	2587	2373	2131				623		2399	2168		623	2682	2364	2237	623		1792	1340
624	2556	2389	1068		624	2397	2087		624	2613	2388	2102	624		2410	2203	624	2587	2373	2131				624		2399	2168		624	2682	2364	2237	624		1792	1340
625	2556	2389	1068		625	2397	2087		625	2613	2388	2102	625		2410	2203	625	2587	2373	2126				625		2399	2168		625	2682	2364	2237	625		1792	1340
626	2556	2389	1064		626	2397	2087		626	2613	2388	2102	626		2410	2203	626	2587	2373	2126				626		2399	2168		626	2682	2364	2237	626		1792	1340
627	2556	2389	1064		627	2397	2087		627	2607	2388	2102	627		2410	2203	627	2587	2373	2126				627		2399	2168		627	2682	2364	2237	627		1792	1340
628	2556	2389	1064		628	2397	2086		628	2607	2388	2096	628		2410	2201	628	2587	2373	2126				628		2399	2168		628	2682	2364	2237	628		1792	1339
629	2556	2389	1064		629	2397	2086		629	2607	2388	2096	629		2410	2201	629	2587	2373	2126				629		2399	2166		629	2682	2364	2237	629		1792	1339
630	2556	2389	1059		630	2397	2086		630	2607	2388	2096	630		2410	2200	630	2587	2373	2126				630		2399	2166		630	2682	2364	2237	630		1792	1339
631	2556	2389	1059		631	2397	2075		631	2595	2388	2096	631		2410	2200	631	2587	2373	2126				631		2399	2166		631	2682	2364	2237	631		1792	1339
632	2556	2389	1059		632	2397	2075		632	2595	2388	2096	632		2410	2200	632	2587	2373	2126				632		2399	2166		632	2682	2364	2230	632		1792	1314
633	2556	2389	1059		633	2397	2075		633	2595	2388	2096	633		2410	2200	633	2587	2373	2126				633		2399	2152		633	2682	2364	2230	633		1792	1314
634	2556	2389	1059		634	2397	2075		634	2595	2388	2096	634		2410	2200	634	2587	2373	2126				634		2399	2152		634	2682	2364	2230	634		1792	1308
635	2556	2389	1046		635	2397	2075		635	2595	2388	2096	635		2410	2200	635	2587	2373	2126				635		2399	2152		635	2682	2364	2230	635		1792	1308
636	2556	2389	1046		636	2397	2075		636	2595	2388	2094	636		2410	2200	636	2587	2373	2126				636		2399	2152		636	2682	2364	2230	636		1792	1308
637	2552	2389	1046		637	2397	2075		637	2595	2388	2094	637		2410	2186	637	2587	2373	2126				637		2399	2152		637	2682	2364	2230	637		1792	1308
638	2552	2389	1046		638	2397	2070		638	2595	2388	2094	638		2410	2186	638	2587	2373	2126				638		2399	2144		638	2682	2364	2230	638		1792	1305
639	2552	2389	1046		639	2397	2070		639	2595	2388	2094	639		2410	2186	639	2587	2373	2126				639		2399	2144		639	2682	2364	2230	639		1792	1305
640	2552	2389	1046		640	2397	2070		640	2595	2388	2094	640		2410	2186	640	2587	2373	2126				640		2399	2144		640	2682	2364	2230	640		1792	1305
641	2552	2389	1036		641	2397	2067		641	2595	2388	2094	641		2410	2186	641	2587	2373	2124				641		2399	2144		641	2682	2364	2230	641		1792	1305
642	2552	2389	1036		642	2397	2067		642	2595	2388	2094	642		2410	2186	642	2587	2373	2124				642		2399	2144		642	2682	2364	2230	642		1792	1302
643	2552	2389	1036		643	2397	2067		643	2595	2388	2094	643		2410	2186	643	2587	2373	2124				643		2399	2144		643	2682	2364	2230	643		1792	1302
644	2552	2389	1036		644	2397	2067		644	2595	2388	2092	644		2410	2186	644	2587	2373	2124				644		2399	2144		644	2682	2364	2230	644		1792	1294
645	2552	2389	1036		645	2397	2067		645	2595	2388	2092	645		2410	2186	645	2587	2373	1117				645		2399	2144		645	2682	2364	2230	645		1792	1294
646	2542	2389	1036		646	2397	2067		646	2595	2388	2092	646		2410	2186	646	2587	2373	1117				646		2399	2144		646	2682	2364	2230	646		1792	1294
647	2542	2389	1036		647	2397	2067		647	2592	2388	2092	647		2410	2186	647	2587	2373	1117				647		2399	2144		647	2682	2364	2230	647		1792	1294
648	2542	2389	1036		648	2397	2067		648	2592	2388	2089	648		2410	2186	648	2587	2373	1117				648		2399	2144		648	2682	2364	2230	648		1792	1294
649	2542	2389	1036		649	2397	2067		649	2592	2388	2089	649		2410	2186	649	2587	2373	1117				649		2399	2144		649	2682	2364	2230	649		1792	1294
650	2542	2389	1036		650	2397	2067		650	2592	2388	2089	650		2410	2183	650	2587	2373	1117				650		2399	2144		650	2682	2364	2230	650		1792	1294
651	2542	2389	1036		651	2397	2067		651	2592	2388	2089	651		2410	2183	651	2587	2373	1117				651		2399	2144		651	2682	2364	2230	651		1792	1294
652	2542	2389	1036		652	2397	2067		652	2592	2388	2085	652		2410	2183	652	2587	2373	1115				652		2399	2144		652	2682	2364	2230	652		1792	1294
653	2542	2389	1036		653	2397	2067		653	2592	2388	2085	653		2410	2183	653	2587	2373	1115				653		2399	2141		653	2682	2364	2230	653		1792	1294
654	2542	2389	1036		654	2397	2067		654	2592	2388	2085	654		2410	2183	654	2587	2373	1115				654		2399	2141		654	2682	2364	2230	654		1792	1294
655	2542	2389	1036		655	2397	2063		655	2592	2388	2085	655		2410	2183	655	2587	2373	1115				655		2399	2141		655	2682	2364	2230	655		1792	1294
656	2542	2389	1036		656	2397	2063		656	2592	2388	2085	656		2410	2181	656	2587	2373	1115				656		2399	2141		656	2682	2364	2230	656		1792	1294
657	2542	2389	1036		657	2397	2063		657	2592	2388	2085	657		2410	2181	657	2587	2373	1115				657		2399	2141		657	2682	2364	2230	657		1792	1294
658	2542	2389	1036		658	2397	2063		658	2592	2388	2085	658		2410	2177	658	2587	2373	1115				658		2399	2125		658	2682	2364	2230	658		1792	1294
659	2542	2389	1036		659	2397	2063		659	2592	2388	2085	659		2410	2177	659	2587	2373	1115				659		2399	2125		659	2682	2364	2230	659		1792	1294
660	2542	2389	1031		660	2397	2063		660	2592	2388	2085	660		2410	2175	660	2587	2373	1112				660		2399	2125		660	2682	2364	2230	660		1792	1294
661	2542	2389	1031		661	2397	2063		661	2592	2388	2073	661		2410	2175	661	2587	2373	1112				661		2399	2125		661	2682	2364	2230	661		1792	1294
662	2542	2389	1031		662	2397	2063		662	2592	2388	2073	662		2410	2175	662	2587	2373	1112				662		2399	2125		662	2682	2364	2230	662		1792	1294
663	2542	2389	1031		663	2397	2062		663	2592	2388	2073	663		2410	2175	663	2587	2373	1112				663		2399	2125		663	2682	2364	2230	663		1792	1294
664	2542	2389	1031		664	2397	2062		664	2592	2388	2073	664		2410	2175	664	2587	2373	1112				664		2399	2125		664	2682	2364	2222	664		1792	1294
665	2542	2389	1026		665	2397	2062		665	2592	2388	2073	665		2410	2175	665	2587	2373	1112				665		2399	2125		665	2682	2364	2222	665		1792	1294
666	2542	2389	1026		666	2397	2062		666	2592	2388	2073	666		2410	2173	666	2587	2373	1112				666		2399	2125		666	2682	2364	2221	666		1792	1294
667	2542	2389	1026		667	2397	2061		667	2592	2388	2073	667		2410	2173	667	2587	2373	1112				667		2399	2125		667	2682	2364	2221	667		1792	1294
668	2542	2389	1023		668	2397	2061		668	2592	2388	2073	668		2410	2173	668	2587	2373	1112				668		2399	2125		668	2682	2364	2221	668		1792	1294
669	2542	2389	1023		669	2397	2061		669	2592	2388	2073	669		2410	2173	669	2587	2373	1109				669		2399	2125		669	2682	2364	2221	669		1792	1294
670	2542	2389	1023		670	2397	2061		670	2592	2388	2073	670		2410	2173	670	2587	2373	1109				670		2399	2123		670	2682	2364	2221	670		1792	1294
671	2542	2389	1023		671	2397	2057		671	2592	2388	2073	671		2410	2173	671	2587	2373	1109				671		2399	2123		671	2682	2364	2221	671		1792	1294
672	2542	2389	1023		672	2397	2056		672	2592	2388	2073	672		2410	2173	672	2587	2373	1109				672		2399	2123		672	2682	2364	2221	672		1792	1294
673	2542	2389	1023		673	2397	2056		673	2592	2388	2073	673		2410	2155	673	2587	2373	1102				673		2399	1120		673	2682	2364	2221	673		1792	1294
674	2542	2389	1023		674	2397	2056		674	2592	2388	2073	674		2410	2155	674	2587	2373	1102				674		2399	1120		674	2682	2364	2221	674		1792	1294
675	2542	2389	1023		675	2397	2053		675	2592	2388	2073	675		2410	2155	675	2587	2373	1102				675		2399	1120		675	2682	2364	2221	675		1792	1294
676	2542	2389	1017		676	2397	2053		676	2592	2388	2073	676		2410	2155	676	2587	2373	1096				676		2399	1110		676	2682	2364	2221	676		1792	1294
677	2542	2389	1017		677	2397	2053		677	2592	2388	2070	677		2410	2155	677	2587	2373	1096				677		2399	1110		677	2682	2364	2221	677		1792	1294
678	2542	2389	1017		678	2397	2053		678	2592	2388	2068	678		2410	2155	678	2587	2373	1096				678		2399	1110		678	2682	2364	2221	678		1792	1294
679	2542	2389	1017		679	2397	2053		679	2592	2388	2068	679		2410	2155	679	2587	2373	1096				679		2399	1110		679	2682	2364	2221	679		1792	1294
680	2534	2389	1017		680	2397	2053		680	2592	2388	2068	680		2410	2150	680	2587	2373	1096				680		2399	1110		680	2682	2364	2212	680		1792	1294
681	2534	2389	1017		681	2397	2053		681	2592	2388	2068	681		2410	2150	681	2587	2373	1093				681		2399	1110		681	2682	2364	2212	681		1792	1294
682	2534	2389	1017		682	2397	2053		682	2592	2388	2068	682		2410	2150	682	2587	2373	1093				682		2399	1110		682	2682	2364	2212	682		1792	1294
683	2534	2389	1007		683	2397	2051		683	2592	2388	2068	683		2410	2150	683	2587	2373	1093				683		2399	1110		683	2682	2364	2212	683		1792	1294
684	2534	2389	1007		684	2397	2051		684	2592	2388	2068	684		2410	2150	684	2587	2373	1093				684		2399	1110		684	2682	2364	2212	684		1792	1286
685	2534	2389	1007		685	2397	2051		685	2592	2388	2068	685		2410	2150	685	2587	2373	1088				685		2399	1110		685	2682	2364	2212	685		1792	1286
686	2534	2389	1007		686	2397	2051		686	2592	2388	2068	686		2410	2150	686	2587	2373	1088				686		2399	1110		686	2682	2364	2212	686		1792	1286
687	2534	2389	1007		687	2397	2051		687	2592	2384	2068	687		2410	2150	687	2587	2373	1088				687		2399	1110		687	2682	2364	2212	687		1792	1286
688	2534	2389	1007		688	2397	2048		688	2592	2384	2066	688		2410	2145	688	2587	2373	1088				688		2399	1110		688	2682	2364	1210	688		1792	1286
689	2534	2389	1007		689	2397	2048		689	2592	2384	2066	689		2410	2145	689	2587	2373	1079				689		2399	1110		689	2682	2364	1210	689		1792	1286
690	2534	2389	996		690	2397	2046		690	2592	2384	2066	690		2410	2145	690	2587	2373	1079				690		2399	1110		690	2682	2364	1208	690		1792	1286
691	2534	2389	996		691	2397	2046		691	2592	2384	2066	691		2410	2145	691	2587	2373	1079				691		2399	1110		691	2682	2364	1208	691		1792	1286
692	2534	2389	996		692	2397	2046		692	2592	2384	2064	692		2410	2145	692	2587	2373	1079				692		2399	1110		692	2682	2364	1208	692		1792	1286
693	2534	2389	990		693	2397	2046		693	2592	2384	2064	693		2410	2145	693	2587	2373	1079				693		2399	1101		693	2682	2364	1208	693		1792	1286
694	2534	2389	990		694	2397	2046		694	2592	2384	2064	694		2410	2145	694	2587	2373	1079				694		2399	1101		694	2682	2364	1208	694		1792	1266
695	2534	2389	990		695	2397	2046		695	2592	2384	2064	695		2410	2145	695	2587	2373	1079				695		2399	1101		695	2682	2364	1208	695		1792	1266
696	2534	2389	990		696	2397	2040		696	2592	2384	2064	696		2410	2142	696	2587	2373	1079				696		2399	1101		696	2682	2364	1208	696		1792	1266
697	2534	2389	990		697	2397	2040		697	2592	2384	2064	697		2410	2142	697	2587	2373	1079				697		2399	1101		697	2682	2364	1208	697		1792	1266
698	2534	2389	990		698	2397	2040		698	2592	2384	2064	698		2410	2131	698	2587	2373	1079				698		2399	1098		698	2682	2364	1208	698		1792	1265
699	2534	2389	990		699	2397	2040		699	2592	2384	2064	699		2410	2131	699	2587	2373	1079				699		2399	1098		699	2682	2364	1208	699		1792	1265
700	2534	2389	990		700	2397	2040		700	2592	2384	2064	700		2410	2131	700	2587	2373	1079				700		2399	1098		700	2682	2364	1208	700		1792	1265
701	2534	2389	990		701	2397	2040		701	2592	2384	2064	701		2410	2131	701	2587	2373	1079				701		2399	1098		701	2682	2364	1208	701		1792	1265
702	2523	2389	990		702	2397	2037		702	2592	2384	2064	702		2410	2131	702	2587	2373	1079				702		2399	1098		702	2682	2364	1208	702		1792	1260
703	2523	2389	988		703	2397	2037		703	2592	2384	2064	703		2410	2131	703	2587	2373	1079				703		2399	1098		703	2682	2364	1208	703		1792	1260
704	2523	2389	988		704	2397	2037		704	2592	2384	2064	704		2410	2131	704	2587	2373	1076				704		2399	1098		704	2682	2364	1208	704		1792	1260
705	2523	2389	988		705	2397	2032		705	2592	2384	2054	705		2410	2131	705	2587	2373	1076				705		2399	1098		705	2682	2364	1208	705		1792	1260
706	2523	2389	988		706	2397	2032		706	2592	2384	2054	706		2410	2131	706	2587	2373	1076				706		2399	1098		706	2682	2364	1200	706		1792	1260
707	2523	2389	988		707	2397	2032		707	2592	2384	2054	707		2410	2131	707	2587	2373	1076				707		2399	1098		707	2682	2364	1200	707		1792	1260
708	2523	2389	988		708	2397	2032		708	2592	2384	2054	708		2410	2126	708	2585	2373	1076				708		2399	1098		708	2682	2364	1200	708		1792	1255
709	2523	2389	988		709	2397	2032		709	2592	2384	2054	709		2410	2126	709	2585	2373	1076				709		2399	1095		709	2682	2364	1200	709		1792	1255
710	2523	2389	988		710	2397	2032		710	2592	2384	2054	710		2410	2126	710	2585	2373	1076				710		2399	1095		710	2682	2364	1200	710		1792	1255
711	2523	2389	988		711	2397	2032		711	2592	2384	2054	711		2410	2126	711	2585	2373	1076				711		2399	1095		711	2682	2364	1200	711		1792	1255
712	2523	2389	988		712	2397	2032		712	2592	2384	2054	712		2410	2126	712	2585	2373	1076				712		2399	1095		712	2682	2364	1200	712		1792	1255
713	2523	2389	988		713	2397	2032		713	2592	2384	2054	713		2410	2110	713	2585	2373	1069				713		2399	1093		713	2682	2364	1200	713		1792	1255
714	2523	2389	988		714	2397	2032		714	2592	2384	2054	714		2410	2110	714	2585	2373	1069				714		2399	1093		714	2682	2364	1200	714		1792	1255
715	2523	2389	988		715	2397	2029		715	2592	2384	2054	715		2410	2110	715	2585	2373	1069				715		2399	1093		715	2682	2364	1200	715		1792	1255
716	2523	2389	988		716	2397	2029		716	2592	2384	2054	716		2410	2101	716	2585	2373	1069				716		2399	1093		716	2682	2364	1200	716		1792	1255
717	2523	2389	988		717	2397	2029		717	2592	2384	2054	717		2410	2101	717	2585	2373	1069				717		2399	1093		717	2682	2364	1200	717		1792	1255
718	2523	2389	988		718	2397	2029		718	2592	2384	2053	718		2410	2101	718	2585	2373	1069				718		2399	1093		718	2682	2364	1198	718		1792	1255
719	2523	2389	988		719	2397	2029		719	2581	2384	2053	719		2410	2101	719	2585	2373	1069				719		2399	1093		719	2682	2328	1198	719		1792	1255
720	2523	2389	984		720	2397	2029		720	2581	2384	2053	720		2410	2101	720	2585	2373	1069				720		2399	1093		720	2682	2328	1198	720		1792	1255
721	2523	2389	984		721	2397	2029		721	2581	2384	2050	721		2410	2101	721	2585	2373	1065				721		2399	1090		721	2682	2328	1198	721		1792	1255
722	2519	2389	984		722	2397	2029		722	2581	2384	2050	722		2410	2101	722	2585	2373	1065				722		2399	1090		722	2682	2328	1198	722		1792	1255
723	2519	2389	984		723	2397	2029		723	2581	2384	2050	723		2410	2101	723	2585	2373	1065				723		2399	1090		723	2682	2328	1198	723		1792	1255
724	2519	2389	984		724	2397	2029		724	2581	2384	2046	724		2410	2101	724	2585	2373	1063				724		2399	1090		724	2682	2328	1198	724		1792	1245
725	2519	2389	984		725	2397	2029		725	2581	2384	2046	725		2410	2101	725	2585	2373	1063				725		2399	1090		725	2682	2328	1198	725		1792	1245
726	2519	2389	984		726	2397	2028		726	2581	2384	2046	726		2410	2101	726	2585	2373	1059				726		2399	1090		726	2682	2328	1193	726		1792	1245
727	2519	2389	984		727	2397	2028		727	2581	2384	2046	727		2410	2101	727	2585	2373	1059				727		2399	1090		727	2682	2328	1193	727		1792	1245
728	2519	2389	984		728	2397	2026		728	2581	2384	2046	728		2410	2099	728	2585	2373	1059				728		2399	1090		728	2682	2328	1193	728		1792	1245
729	2519	2389	984		729	2397	2026		729	2581	2384	2046	729		2410	2099	729	2585	2373	1059				729		2399	1084		729	2682	2328	1193	729		1792	1245
730	2519	2389	984		730	2397	2021		730	2581	2384	2046	730		2410	2099	730	2585	2373	1059				730		2399	1084		730	2682	2328	1193	730		1792	1245
731	2519	2389	984		731	2397	2021		731	2581	2384	2046	731		2410	2099	731	2585	2373	1059				731		2399	1084		731	2682	2328	1193	731		1792	1245
732	2519	2389	984		732	2397	2021		732	2581	2384	2046	732		2410	2099	732	2585	2373	1049				732		2399	1081		732	2682	2328	1193	732		1792	1245
733	2513	2389	984		733	2397	1022		733	2581	2384	2046	733		2410	2092	733	2585	2373	1049				733		2399	1081		733	2682	2328	1193	733		1792	1245
734	2513	2389	984		734	2397	1022		734	2581	2384	1048	734		2410	2092	734	2585	2373	1049				734		2399	1081		734	2682	2328	1186	734		1792	1244
735	2513	2389	984		735	2397	1022		735	2581	2384	1048	735		2410	2092	735	2583	2373	1049				735		2399	1081		735	2682	2328	1186	735		1792	1244
736	2513	2389	980		736	2397	1022		736	2581	2384	1048	736		2410	2092	736	2583	2373	1049				736		2399	1081		736	2682	2328	1186	736		1792	1244
737	2513	2389	976		737	2397	1022		737	2581	2384	1048	737		2410	2092	737	2583	2373	1041				737		2399	1078		737	2682	2328	1186	737		1792	1244
738	2513	2389	976		738	2397	1022		738	2581	2384	1045	738		2410	2092	738	2583	2373	1041				738		2399	1078		738	2682	2328	1186	738		1792	1244
739	2513	2389	976		739	2397	1022		739	2581	2384	1045	739		2410	2092	739	2583	2373	1041				739		2399	1078		739	2682	2328	1186	739		1792	1244
740	2513	2389	976		740	2397	1019		740	2581	2384	1045	740		2410	2092	740	2583	2373	1035				740		2399	1078		740	2682	2328	1186	740		1792	1244
741	2513	2389	976		741	2397	1019		741	2581	2384	1045	741		2410	2087	741	2583	2373	1035				741		2399	1078		741	2682	2328	1186	741		1792	1244
742	2513	2389	976		742	2397	1019		742	2581	2384	1045	742		2410	2087	742	2583	2373	1035				742		2399	1078		742	2682	2328	1186	742		1792	1244
743	2513	2389	976		743	2397	1019		743	2581	2384	1045	743		2410	2087	743	2583	2373	1035				743		2399	1078		743	2682	2328	1186	743		1792	1244
744	2513	2389	976		744	2397	1019		744	2581	2384	1045	744		2410	2082	744	2583	2373	1035				744		2399	1078		744	2682	2328	1186	744		1792	1244
745	2513	2389	976		745	2397	1019		745	2581	2384	1045	745		2410	2082	745	2583	2373	1031				745		2399	1078		745	2682	2328	1186	745		1792	1244
746	2513	2389	976		746	2397	1019		746	2581	2384	1045	746		2410	2082	746	2583	2373	1031				746		2399	1078		746	2682	2328	1186	746		1792	1244
747	2513	2389	976		747	2397	1019		747	2581	2384	1045	747		2410	2082	747	2583	2373	1031				747		2399	1078		747	2682	2328	1186	747		1792	1244
748	2513	2389	976		748	2397	1019		748	2581	2384	1045	748		2410	2078	748	2583	2373	1031				748		2399	1076		748	2682	2328	1185	748		1792	1244
749	2513	2389	976		749	2397	1019		749	2581	2384	1038	749		2410	2078	749	2583	2373	1031				749		2399	1076		749	2682	2328	1185	749		1792	1244
750	2513	2389	976		750	2397	1009		750	2581	2384	1038	750		2410	2078	750	2583	2373	1031				750		2399	1076		750	2682	2328	1185	750		1792	1244
751	2513	2389	976		751	2397	1009		751	2581	2384	1038	751		2410	2078	751	2583	2373	1031				751		2399	1076		751	2682	2328	1185	751		1792	1244
752	2513	2389	976		752	2397	1009		752	2581	2384	1038	752		2410	2078	752	2583	2373	1031				752		2399	1076		752	2682	2328	1185	752		1792	1243
753	2513	2389	976		753	2397	1009		753	2581	2384	1038	753		2410	2078	753	2583	2373	1029				753		2399	1076		753	2682	2328	1185	753		1792	1243
754	2513	2389	976		754	2397	1009		754	2581	2384	1038	754		2410	2078	754	2583	2373	1029				754		2399	1076		754	2682	2328	1185	754		1792	1243
755	2513	2389	976		755	2397	1009		755	2581	2384	1038	755		2410	2078	755	2583	2373	1029				755		2399	1076		755	2682	2328	1185	755		1792	1243
756	2510	2389	976		756	2397	1009		756	2581	2384	1038	756		2410	2078	756	2583	2373	1029				756		2399	1076		756	2682	2328	1185	756		1792	1243
757	2510	2389	976		757	2397	1009		757	2581	2384	1033	757		2410	2078	757	2583	2373	1028				757		2399	1076		757	2682	2328	1185	757		1792	1243
758	2510	2389	964		758	2397	1009		758	2581	2384	1033	758		2410	2076	758	2583	2373	1028				758		2399	1073		758	2682	2328	1183	758		1792	1243
759	2510	2389	964		759	2397	1009		759	2581	2384	1033	759		2410	2076	759	2583	2373	1028				759		2399	1073		759	2682	2328	1183	759		1792	1243
760	2510	2389	964		760	2397	1009		760	2581	2384	1033	760		2410	2073	760	2583	2373	1028				760		2399	1073		760	2682	2328	1175	760		1792	1242
761	2510	2389	964		761	2397	1009		761	2581	2384	1033	761		2410	2073	761	2583	2373	1028				761		2399	1073		761	2682	2328	1175	761		1792	1242
762	2510	2389	964		762	2397	1009		762	2581	2384	1033	762		2410	2073	762	2583	2373	1022				762		2399	1073		762	2682	2328	1175	762		1792	1242
763	2510	2389	964		763	2397	999		763	2581	2384	1033	763		2410	2073	763	2583	2373	1022				763		2399	1073		763	2682	2328	1175	763		1792	1242
764	2510	2389	964		764	2397	999		764	2581	2384	1033	764		2410	2073	764	2583	2373	1022				764		2399	1073		764	2682	2328	1175	764		1792	1242
765	2510	2389	963		765	2397	999		765	2581	2384	1033	765		2410	2073	765	2583	2373	1022				765		2399	1073		765	2682	2328	1175	765		1792	1242
766	2510	2389	963		766	2397	995		766	2581	2384	1033	766		2410	2073	766	2580	2373	1022				766		2399	1073		766	2682	2328	1175	766		1792	1242
767	2510	2389	963		767	2397	995		767	2581	2384	1033	767		2410	2073	767	2580	2373	1022				767		2399	1073		767	2682	2328	1175	767		1792	1242
768	2508	2389	963		768	2397	995		768	2581	2384	1033	768		2410	2073	768	2580	2373	1022				768		2399	1073		768	2682	2328	1175	768		1792	1242
769	2508	2389	963		769	2397	995		769	2581	2384	1026	769		2410	2073	769	2580	2373	1022				769		2399	1073		769	2682	2328	1175	769		1792	1242
770	2508	2389	963		770	2397	995		770	2581	2384	1026	770		2410	2070	770	2580	2373	1022				770		2399	1064		770	2682	2328	1175	770		1792	1240
771	2508	2389	963		771	2397	995		771	2581	2384	1026	771		2410	2070	771	2580	2373	1022				771		2399	1064		771	2682	2328	1175	771		1792	1240
772	2508	2389	958		772	2397	995		772	2581	2384	1026	772		2410	2069	772	2580	2373	1016				772		2399	1064		772	2682	2328	1175	772		1792	1240
773	2508	2389	958		773	2397	995		773	2581	2384	1026	773		2410	2069	773	2580	2373	1016				773		2399	1064		773	2682	2328	1175	773		1792	1240
774	2508	2389	958		774	2397	995		774	2581	2384	1026	774		2410	2069	774	2580	2373	1016				774		2399	1064		774	2682	2328	1175	774		1792	1240
775	2508	2389	958		775	2397	995		775	2581	2384	1026	775		2410	2069	775	2580	2373	1016				775		2399	1064		775	2682	2328	1175	775		1792	1240
776	2508	2389	958		776	2397	995		776	2581	2384	1026	776		2410	2069	776	2580	2373	1007				776		2399	1064		776	2682	2328	1175	776		1792	1233
777	2508	2389	958		777	2397	995		777	2581	2384	1026	777		2410	2069	777	2580	2373	1007				777		2399	1064		777	2682	2328	1175	777		1792	1233
778	2508	2389	958		778	2397	988		778	2581	2384	1026	778		2410	2069	778	2580	2373	1007				778		2399	1064		778	2682	2328	1175	778		1792	1233
779	2508	2389	958		779	2397	988		779	2581	2384	1026	779		2410	2069	779	2580	2373	1007				779		2399	1064		779	2682	2328	1175	779		1792	1233
780	2500	2389	956		780	2397	988		780	2581	2384	1026	780		2410	2069	780	2580	2373	1007				780		2399	1064		780	2682	2328	1170	780		1792	1233
781	2500	2389	956		781	2397	988		781	2581	2384	1018	781		2410	2069	781	2580	2373	1007				781		2399	1064		781	2682	2328	1170	781		1792	1233
782	2500	2389	956		782	2397	988		782	2581	2384	1018	782		2410	2069	782	2580	2373	1007				782		2399	1063		782	2682	2328	1170	782		1792	1231
783	2500	2389	956		783	2397	988		783	2581	2384	1018	783		2410	2069	783	2580	2373	1007				783		2399	1063		783	2682	2328	1170	783		1792	1231
784	2500	2389	956		784	2397	988		784	2581	2384	1018	784		2410	2067	784	2580	2373	1007				784		2399	1063		784	2682	2328	1170	784		1792	1231
785	2500	2389	956		785	2397	988		785	2581	2384	1018	785		2410	2067	785	2580	2373	1007				785		2399	1063		785	2682	2328	1170	785		1792	1231
786	2500	2389	955		786	2397	988		786	2581	2384	1018	786		2410	2067	786	2580	2373	1007				786		2399	1063		786	2682	2328	1170	786		1792	1231
787	2500	2389	955		787	2397	988		787	2581	2384	1018	787		2410	2067	787	2580	2373	1007				787		2399	1063		787	2682	2328	1170	787		1792	1231
788	2500	2389	955		788	2397	988		788	2581	2384	1018	788		2410	2067	788	2580	2373	1007				788		2399	1063		788	2682	2328	1170	788		1792	1228
789	2500	2389	955		789	2397	988		789	2581	2384	1018	789		2410	2066	789	2580	2373	1007				789		2399	1044		789	2682	2328	1170	789		1792	1228
790	2500	2389	955		790	2397	986		790	2581	2384	1013	790		2410	2062	790	2580	2373	1007				790		2399	1044		790	2682	2328	1170	790		1792	1228
791	2500	2389	948		791	2397	986		791	2581	2384	1013	791		2410	2062	791	2580	2373	1007				791		2399	1044		791	2682	2328	1170	791		1792	1228
792	2500	2389	948		792	2397	973		792	2581	2384	1013	792		2410	2062	792	2580	2373	1007				792		2399	1044		792	2682	2328	1170	792		1792	1228
793	2500	2389	948		793	2397	973		793	2581	2384	1011	793		2410	2062	793	2580	2373	1007				793		2399	1044		793	2682	2328	1170	793		1792	1228
794	2500	2389	948		794	2397	973		794	2581	2384	1010	794		2410	2062	794	2580	2373	1007				794		2399	1044		794	2682	2328	1166	794		1792	1228
795	2500	2389	948		795	2397	973		795	2581	2384	1010	795		2410	2062	795	2580	2373	1007				795		2399	1044		795	2682	2328	1166	795		1792	1228
796	2500	2389	948		796	2397	973		796	2581	2384	1010	796		2410	2062	796	2580	2373	1007				796		2399	1044		796	2682	2328	1166	796		1792	1228
797	2500	2389	946		797	2397	973		797	2581	2384	1010	797		2410	2062	797	2580	2373	1007				797		2399	1044		797	2682	2328	1166	797		1792	1228
798	2500	2389	946		798	2397	973		798	2581	2384	1010	798		2410	2062	798	2579	2373	1007				798		2399	1044		798	2682	2328	1166	798		1792	1228
799	2500	2389	946		799	2397	973		799	2581	2384	1010	799		2410	2062	799	2579	2373	1007				799		2399	1044		799	2682	2328	1166	799		1792	1228
800	2500	2389	946		800	2397	973		800	2581	2384	1010	800		2410	2059	800	2579	2373	1004				800		2399	1044		800	2682	2328	1166	800		1792	1228
801	2500	2389	945		801	2397	973		801	2581	2384	1006	801		2410	2059	801	2579	2373	1004				801		2399	1044		801	2682	2328	1166	801		1792	1228
802	2500	2389	942		802	2397	973		802	2581	2384	1006	802		2410	2058	802	2579	2373	1004				802		2399	1044		802	2682	2328	1166	802		1792	1228
803	2500	2389	942		803	2397	973		803	2581	2384	1006	803		2410	2058	803	2579	2373	1004				803		2399	1044		803	2682	2328	1166	803		1792	1228
804	2500	2389	942		804	2397	973		804	2581	2384	1006	804		2410	2054	804	2579	2373	1004				804		2399	1040		804	2682	2328	1166	804		1792	1228
805	2500	2389	942		805	2397	973		805	2581	2384	1006	805		2410	2054	805	2579	2373	1002				805		2399	1040		805	2682	2328	1166	805		1792	1228
806	2500	2389	942		806	2397	973		806	2581	2384	1006	806		2410	1056	806	2579	2373	1002				806		2399	1039		806	2682	2328	1164	806		1792	1228
807	2500	2389	942		807	2397	973		807	2581	2384	1006	807		2410	1056	807	2579	2373	1002				807		2399	1039		807	2682	2328	1164	807		1792	1228
808	2500	2389	942		808	2397	973		808	2581	2384	1001	808		2410	1056	808	2579	2373	997				808		2399	1039		808	2682	2328	1163	808		1792	1228
809	2500	2389	942		809	2397	973		809	2581	2384	1001	809		2410	1056	809	2579	2373	997				809		2399	1037		809	2682	2328	1163	809		1792	1228
810	2500	2389	942		810	2397	973		810	2581	2384	1001	810		2410	1056	810	2579	2373	997				810		2399	1037		810	2682	2328	1163	810		1792	1228
811	2500	2389	942		811	2397	973		811	2581	2384	1001	811		2410	1056	811	2579	2373	997				811		2399	1037		811	2682	2328	1163	811		1792	1228
812	2500	2389	942		812	2397	973		812	2581	2384	1001	812		2410	1056	812	2579	2373	997				812		2399	1037		812	2682	2328	1153	812		1792	1225
813	2500	2389	942		813	2397	973		813	2581	2384	1001	813		2410	1056	813	2579	2373	992				813		2399	1037		813	2682	2328	1153	813		1792	1225
814	2500	2389	942		814	2397	973		814	2581	2384	1001	814		2410	1056	814	2579	2373	992				814		2399	1037		814	2682	2328	1153	814		1792	1225
815	2500	2389	942		815	2397	969		815	2581	2384	1001	815		2410	1056	815	2578	2373	992				815		2399	1037		815	2682	2328	1153	815		1792	1225
816	2500	2389	942		816	2397	969		816	2581	2384	1001	816		2410	1054	816	2578	2373	992				816		2399	1037		816	2682	2328	1153	816		1792	1225
817	2500	2389	942		817	2397	969		817	2581	2384	1000	817		2410	1054	817	2578	2373	992				817		2399	1037		817	2682	2328	1153	817		1792	1225
818	2500	2389	942		818	2397	969		818	2581	2384	1000	818		2410	1054	818	2578	2373	992				818		2399	1037		818	2682	2328	1153	818		1792	1225
819	2500	2389	942		819	2397	969		819	2581	2384	1000	819		2410	1054	819	2578	2373	992				819		2399	1037		819	2682	2328	1153	819		1792	1225
820	2500	2389	942		820	2397	965		820	2581	2384	1000	820		2410	1054	820	2578	2373	992				820		2399	1037		820	2682	2328	1153	820		1792	1225
821	2500	2389	942		821	2397	965		821	2581	2384	1000	821		2410	1054	821	2578	2373	992				821		2399	1037		821	2682	2328	1153	821		1792	1225
822	2500	2389	942		822	2397	965		822	2581	2384	1000	822		2410	1052	822	2578	2373	992				822		2399	1034		822	2682	2328	1145	822		1792	1225
823	2500	2389	942		823	2397	964		823	2581	2384	1000	823		2410	1052	823	2578	2373	992				823		2399	1034		823	2682	2328	1145	823		1792	1225
824	2500	2389	942		824	2397	964		824	2581	2384	1000	824		2410	1052	824	2578	2373	992				824		2399	1034		824	2682	2328	1145	824		1792	1225
825	2500	2389	942		825	2397	964		825	2581	2384	999	825		2410	1052	825	2578	2373	992				825		2399	1034		825	2682	2328	1145	825		1792	1225
826	2500	2389	942		826	2397	964		826	2581	2384	999	826		2410	1041	826	2578	2373	992				826		2399	1034		826	2682	2328	1145	826		1792	1224
827	2500	2389	942		827	2397	959		827	2581	2384	999	827		2410	1041	827	2578	2373	992				827		2399	1034		827	2682	2328	1145	827		1792	1224
828	2500	2389	940		828	2397	959		828	2581	2384	997	828		2410	1041	828	2578	2373	992				828		2399	1034		828	2682	2328	1145	828		1792	1224
829	2500	2389	940		829	2397	959		829	2581	2384	997	829		2410	1039	829	2578	2373	992				829		2399	1034		829	2682	2328	1145	829		1792	1224
830	2500	2389	940		830	2397	959		830	2581	2384	997	830		2410	1039	830	2578	2373	992				830		2399	1031		830	2682	2328	1145	830		1792	1224
831	2500	2389	940		831	2397	959		831	2581	2384	997	831		2410	1039	831	2569	2373	992				831		2399	1031		831	2682	2328	1145	831		1792	1224
832	2500	2389	940		832	2397	959		832	2581	2384	997	832		2410	1039	832	2569	2373	992				832		2399	1031		832	2682	2328	1139	832		1792	1224
833	2500	2389	940		833	2397	959		833	2581	2384	997	833		2410	1039	833	2569	2373	988				833		2399	1031		833	2682	2328	1139	833		1792	1224
834	2500	2389	940		834	2397	959		834	2581	2384	997	834		2410	1039	834	2569	2373	988				834		2399	1031		834	2682	2328	1139	834		1792	1224
835	2500	2389	940		835	2397	955		835	2581	2384	997	835		2410	1039	835	2569	2373	988				835		2399	1031		835	2682	2328	1139	835		1792	1224
836	2500	2389	940		836	2397	955		836	2581	2384	994	836		2410	1039	836	2569	2373	988				836		2399	1029		836	2682	2328	1139	836		1792	1224
837	2500	2389	938		837	2397	955		837	2581	2384	994	837		2410	1039	837	2569	2373	988				837		2399	1029		837	2682	2328	1139	837		1792	1224
838	2500	2389	938		838	2397	955		838	2581	2384	994	838		2410	1036	838	2569	2373	988				838		2399	1029		838	2682	2328	1137	838		1792	1223
839	2500	2389	938		839	2397	955		839	2581	2384	994	839		2410	1036	839	2569	2373	988				839		2399	1029		839	2682	2328	1137	839		1792	1223
840	2500	2389	938		840	2397	955		840	2581	2384	994	840		2410	1036	840	2569	2373	988				840		2399	1027		840	2682	2328	1137	840		1792	1223
841	2500	2389	938		841	2397	955		841	2581	2384	994	841		2410	1034	841	2569	2373	985				841		2399	1027		841	2682	2328	1137	841		1792	1223
842	2500	2389	938		842	2397	955		842	2581	2384	994	842		2410	1034	842	2569	2373	985				842		2399	1027		842	2682	2328	1136	842		1792	1223
843	2500	2389	938		843	2397	955		843	2581	2384	994	843		2410	1034	843	2569	2373	985				843		2399	1027		843	2682	2328	1136	843		1792	1223
844	2499	2389	938		844	2397	955		844	2581	2384	991	844		2410	1034	844	2569	2373	985				844		2399	1027		844	2682	2328	1136	844		1792	1223
845	2499	2389	938		845	2397	955		845	2581	2384	991	845		2410	1034	845	2569	2373	978				845		2399	1027		845	2682	2328	1136	845		1792	1223
846	2499	2389	938		846	2397	955		846	2581	2384	988	846		2410	1034	846	2569	2373	978				846		2399	1027		846	2682	2328	1136	846		1792	1223
847	2499	2389	938		847	2397	955		847	2581	2384	988	847		2410	1034	847	2569	2373	978				847		2399	1027		847	2682	2328	1136	847		1792	1223
848	2499	2389	938		848	2397	955		848	2581	2384	988	848		2410	1031	848	2569	2373	978				848		2399	1026		848	2682	2328	1136	848		1792	1223
849	2499	2389	938		849	2397	955		849	2581	2384	985	849		2410	1031	849	2569	2373	978				849		2399	1026		849	2682	2328	1136	849		1792	1223
850	2499	2389	938		850	2397	955		850	2581	2384	985	850		2410	1031	850	2569	2373	978				850		2399	1026		850	2682	2328	1134	850		1792	1223
851	2499	2389	935		851	2397	955		851	2581	2384	985	851		2410	1031	851	2569	2373	978				851		2399	1026		851	2682	2328	1134	851		1792	1223
852	2499	2389	935		852	2397	955		852	2581	2384	985	852		2410	1029	852	2569	2373	975				852		2399	1026		852	2682	2328	1134	852		1792	1220
853	2499	2389	935		853	2397	955		853	2581	2384	985	853		2410	1029	853	2569	2373	975				853		2399	1025		853	2682	2328	1134	853		1792	1220
854	2499	2389	935		854	2397	955		854	2581	2384	976	854		2410	1029	854	2569	2373	975				854		2399	1025		854	2682	2328	1134	854		1792	1220
855	2499	2389	935		855	2397	955		855	2581	2384	976	855		2410	1029	855	2569	2373	975				855		2399	1025		855	2682	2328	1134	855		1792	1220
856	2496	2389	935		856	2397	955		856	2581	2384	976	856		2410	1029	856	2569	2373	972				856		2399	1024		856	2682	2328	1132	856		1792	1220
857	2496	2389	935		857	2397	955		857	2581	2384	976	857		2410	1029	857	2569	2373	972				857		2399	1024		857	2682	2328	1132	857		1792	1220
858	2496	2389	935		858	2397	955		858	2581	2384	976	858		2410	1029	858	2569	2373	972				858		2399	1024		858	2682	2328	1132	858		1792	1220
859	2496	2389	935		859	2397	955		859	2581	2384	976	859		2410	1029	859	2569	2373	972				859		2399	1024		859	2682	2328	1132	859		1792	1220
860	2496	2389	935		860	2397	955		860	2581	2384	976	860		2410	1029	860	2569	2373	972				860		2399	1024		860	2682	2328	1132	860		1792	1220
861	2496	2389	935		861	2397	953		861	2581	2384	976	861		2410	1024	861	2569	2373	972				861		2399	1024		861	2682	2328	1132	861		1792	1220
862	2496	2389	935		862	2397	945		862	2581	2384	976	862		2410	1024	862	2569	2373	972				862		2399	1024		862	2682	2328	1132	862		1792	1220
863	2496	2389	935		863	2397	945		863	2581	2384	976	863		2410	1024	863	2569	2373	972				863		2399	1024		863	2682	2328	1132	863		1792	1220
864	2496	2389	935		864	2397	945		864	2581	2384	976	864		2410	1024	864	2569	2373	972				864		2399	1024		864	2682	2328	1130	864		1792	1220
865	2496	2389	935		865	2397	945		865	2581	2384	974	865		2410	1022	865	2569	2373	972				865		2399	1024		865	2682	2328	1130	865		1792	1220
866	2491	2389	934		866	2397	945		866	2581	2384	974	866		2410	1022	866	2569	2373	972				866		2399	1024		866	2682	2328	1130	866		1792	1220
867	2491	2389	934		867	2397	945		867	2581	2384	974	867		2410	1022	867	2569	2373	972				867		2399	1024		867	2682	2328	1130	867		1792	1220
868	2491	2389	933		868	2397	945		868	2581	2384	974	868		2410	1022	868	2569	2373	972				868		2399	1021		868	2682	2328	1130	868		1792	1220
869	2491	2389	933		869	2397	945		869	2581	2384	974	869		2410	1022	869	2569	2373	972				869		2399	1021		869	2682	2328	1130	869		1792	1220
870	2491	2389	933		870	2397	945		870	2581	2384	974	870		2410	1022	870	2569	2373	972				870		2399	1021		870	2682	2328	1130	870		1792	1220
871	2491	2389	932		871	2397	945		871	2581	2384	974	871		2410	1022	871	2569	2373	972				871		2399	1021		871	2682	2328	1130	871		1792	1220
872	2491	2389	932		872	2397	945		872	2581	2384	966	872		2410	1019	872	2569	2373	972				872		2399	1010		872	2682	2328	1130	872		1792	1220
873	2491	2389	932		873	2397	943		873	2581	2384	966	873		2410	1019	873	2569	2373	961				873		2399	1010		873	2682	2328	1130	873		1792	1220
874	2491	2389	932		874	2397	943		874	2581	2384	966	874		2410	1016	874	2569	2373	961				874		2399	1010		874	2682	2328	1129	874		1792	1220
875	2491	2389	931		875	2397	943		875	2581	2384	966	875		2410	1016	875	2569	2373	961				875		2399	1010		875	2682	2328	1129	875		1792	1220
876	2491	2389	931		876	2397	943		876	2581	2384	966	876		2410	1016	876	2569	2373	961				876		2399	1010		876	2682	2328	1119	876		1792	1218
877	2491	2389	931		877	2397	939		877	2581	2384	966	877		2410	1016	877	2569	2373	961				877		2399	1010		877	2682	2328	1119	877		1792	1218
878	2477	2389	931		878	2397	939		878	2581	2384	966	878		2410	1016	878	2566	2373	961				878		2399	1010		878	2682	2328	1119	878		1792	1212
879	2477	2389	931		879	2397	939		879	2581	2384	966	879		2410	1016	879	2566	2373	961				879		2399	1010		879	2682	2328	1119	879		1792	1212
880	2477	2389	931		880	2397	939		880	2581	2384	965	880		2410	1011	880	2566	2373	961				880		2399	1010		880	2682	2328	1119	880		1792	1212
881	2477	2389	931		881	2397	939		881	2581	2384	965	881		2410	1011	881	2566	2373	961				881		2399	1010		881	2682	2328	1119	881		1792	1212
882	2477	2389	931		882	2397	939		882	2581	2384	965	882		2410	1011	882	2566	2373	961				882		2399	1010		882	2682	2328	1119	882		1792	1212
883	2477	2389	931		883	2397	939		883	2581	2384	965	883		2410	1011	883	2566	2373	961				883		2399	1010		883	2682	2328	1119	883		1792	1212
884	2477	2389	931		884	2397	939		884	2581	2384	965	884		2410	1011	884	2566	2373	961				884		2399	1010		884	2682	2328	1119	884		1792	1212
885	2477	2389	928		885	2397	939		885	2581	2384	963	885		2410	1011	885	2566	2373	961				885		2399	1010		885	2682	2328	1119	885		1792	1212
886	2477	2389	928		886	2397	939		886	2581	2384	963	886		2410	1011	886	2566	2373	961				886		2399	1010		886	2682	2328	1119	886		1792	1212
887	2477	2389	928		887	2397	939		887	2581	2384	963	887		2410	1011	887	2566	2373	961				887		2399	1010		887	2682	2328	1119	887		1792	1212
888	2477	2389	927		888	2397	939		888	2581	2384	963	888		2410	1011	888	2566	2373	961				888		2399	1010		888	2682	2328	1119	888		1792	1212
889	2477	2389	927		889	2397	939		889	2581	2384	963	889		2410	1011	889	2566	2373	961				889		2399	1010		889	2682	2328	1119	889		1792	1212
890	2472	2389	927		890	2397	939		890	2581	2384	963	890		2410	1003	890	2566	2373	958				890		2399	1010		890	2682	2328	1119	890		1792	1212
891	2472	2389	927		891	2397	939		891	2581	2384	963	891		2410	1003	891	2566	2373	958				891		2399	1010		891	2682	2328	1119	891		1792	1212
892	2472	2389	927		892	2397	939		892	2581	2384	962	892		2410	1003	892	2566	2373	956				892		2399	1010		892	2682	2328	1119	892		1792	1205
893	2472	2389	927		893	2397	939		893	2581	2384	962	893		2410	1003	893	2566	2373	956				893		2399	1010		893	2682	2328	1119	893		1792	1205
894	2472	2389	927		894	2397	939		894	2581	2384	962	894		2410	1003	894	2564	2373	956				894		2399	1010		894	2682	2328	1119	894		1792	1205
895	2472	2389	927		895	2397	939		895	2581	2384	962	895		2410	1003	895	2564	2373	956				895		2399	1010		895	2682	2328	1119	895		1792	1205
896	2472	2389	927		896	2397	939		896	2581	2384	962	896		2410	1003	896	2564	2373	956				896		2399	1010		896	2682	2328	1119	896		1792	1205
897	2472	2389	927		897	2397	939		897	2581	2384	962	897		2410	1003	897	2564	2373	938				897		2399	1010		897	2682	2328	1119	897		1792	1205
898	2472	2389	927		898	2397	939		898	2581	2384	960	898		2410	1003	898	2561	2373	938				898		2399	1010		898	2682	2328	1119	898		1792	1205
899	2472	2389	927		899	2397	939		899	2581	2384	960	899		2410	1003	899	2561	2373	938				899		2399	1010		899	2682	2328	1119	899		1792	1205
900	2472	2389	927		900	2397	938		900	2581	2384	960	900		2410	998	900	2561	2373	938				900		2399	1007		900	2682	2328	1119	900		1792	1205
901	2472	2389	927		901	2397	938		901	2581	2384	960	901		2410	998	901	2561	2373	938				901		2399	1007		901	2682	2328	1119	901		1792	1205
902	2472	2389	927		902	2397	938		902	2581	2384	959	902		2410	997	902	2561	2373	938				902		2399	1007		902	2682	2328	1119	902		1792	1205
903	2472	2389	927		903	2397	938		903	2581	2384	959	903		2410	997	903	2561	2373	938				903		2399	1007		903	2682	2328	1119	903		1792	1205
904	2472	2389	927		904	2397	938		904	2581	2384	959	904		2410	997	904	2561	2373	938				904		2399	1007		904	2682	2328	1106	904		1792	1205
905	2472	2389	927		905	2397	938		905	2581	2384	958	905		2410	997	905	2561	2373	938				905		2399	1007		905	2682	2328	1106	905		1792	1205
906	2472	2389	927		906	2397	938		906	2581	2384	958	906		2410	997	906	2561	2373	938				906		2399	1007		906	2682	2328	1106	906		1792	1205
907	2472	2389	927		907	2397	938		907	2581	2384	958	907		2410	997	907	2561	2373	938				907		2399	1007		907	2682	2328	1106	907		1792	1205
908	2472	2389	927		908	2397	938		908	2581	2384	958	908		2410	997	908	2561	2373	938				908		2399	1007		908	2682	2328	1106	908		1792	1205
909	2472	2389	927		909	2397	938		909	2581	2384	953	909		2410	997	909	2561	2373	938				909		2399	1000		909	2682	2328	1106	909		1792	1205
910	2462	2389	927		910	2397	938		910	2581	2384	953	910		2410	997	910	2557	2373	938				910		2399	1000		910	2682	2328	1095	910		1792	1205
911	2462	2389	927		911	2397	938		911	2581	2384	953	911		2410	997	911	2557	2373	938				911		2399	1000		911	2682	2328	1095	911		1792	1205
912	2462	2389	927		912	2397	935		912	2581	2384	953	912		2410	997	912	2557	2373	938				912		2399	1000		912	2682	2328	1095	912		1792	1205
913	2462	2389	927		913	2397	935		913	2581	2384	953	913		2410	997	913	2557	2373	938				913		2399	1000		913	2682	2328	1095	913		1792	1205
914	2462	2389	927		914	2397	935		914	2581	2384	953	914		2410	996	914	2557	2373	938				914		2399	1000		914	2682	2328	1095	914		1792	1201
915	2462	2389	927		915	2397	935		915	2581	2384	953	915		2410	996	915	2557	2373	938				915		2399	1000		915	2682	2328	1095	915		1792	1201
916	2462	2389	927		916	2397	935		916	2581	2384	953	916		2410	996	916	2557	2373	938				916		2399	1000		916	2682	2328	1095	916		1792	1201
917	2462	2389	927		917	2397	931		917	2581	2384	953	917		2410	996	917	2557	2373	938				917		2399	1000		917	2682	2328	1095	917		1792	1201
918	2462	2389	918		918	2397	931		918	2581	2384	953	918		2410	996	918	2557	2373	938				918		2399	1000		918	2682	2328	1095	918		1792	1201
919	2462	2389	918		919	2397	931		919	2581	2384	953	919		2410	996	919	2557	2373	938				919		2399	1000		919	2682	2328	1095	919		1792	1201
920	2462	2389	918		920	2397	931		920	2581	2384	953	920		2410	996	920	2557	2373	938				920		2399	1000		920	2682	2328	1095	920		1792	1201
921	2462	2389	918		921	2397	928		921	2581	2384	953	921		2410	995	921	2557	2373	938				921		2399	1000		921	2682	2328	1095	921		1792	1201
922	2462	2389	918		922	2397	928		922	2581	2384	953	922		2410	991	922	2557	2373	938				922		2399	1000		922	2682	2328	1095	922		1792	1200
923	2462	2389	918		923	2397	928		923	2581	2384	953	923		2410	991	923	2557	2373	938				923		2399	1000		923	2682	2328	1095	923		1792	1200
924	2462	2389	918		924	2397	928		924	2581	2384	953	924		2410	991	924	2557	2373	938				924		2399	1000		924	2682	2328	1095	924		1792	1197
925	2462	2389	918		925	2397	928		925	2581	2384	953	925		2410	991	925	2557	2373	938				925		2399	1000		925	2682	2328	1095	925		1792	1197
926	2462	2389	918		926	2397	928		926	2581	2384	953	926		2410	991	926	2557	2373	938				926		2399	1000		926	2682	2328	1087	926		1792	1197
927	2462	2389	918		927	2397	928		927	2581	2384	953	927		2410	991	927	2554	2373	938				927		2399	1000		927	2682	2328	1087	927		1792	1197
928	2462	2389	918		928	2397	928		928	2581	2384	950	928		2410	991	928	2554	2373	938				928		2399	997		928	2682	2328	1087	928		1792	1192
929	2462	2389	918		929	2397	928		929	2581	2384	950	929		2410	987	929	2554	2373	938				929		2399	997		929	2682	2328	1087	929		1792	1192
930	2462	2389	918		930	2397	928		930	2581	2384	950	930		2410	987	930	2554	2373	932				930		2399	992		930	2682	2328	1087	930		1792	1192
931	2462	2389	918		931	2397	928		931	2581	2384	950	931		2410	987	931	2554	2373	932				931		2399	992		931	2682	2328	1087	931		1792	1192
932	2462	2389	918		932	2397	928		932	2581	2384	950	932		2410	987	932	2554	2373	932				932		2399	992		932	2682	2328	1087	932		1792	1192
933	2462	2389	918		933	2397	928		933	2581	2384	950	933		2410	987	933	2554	2373	932				933		2399	992		933	2682	2328	1087	933		1792	1192
934	2462	2389	918		934	2397	928		934	2581	2384	950	934		2410	987	934	2554	2373	932				934		2399	992		934	2682	2328	1087	934		1792	1192
935	2462	2389	911		935	2397	928		935	2581	2384	950	935		2410	987	935	2554	2373	932				935		2399	992		935	2682	2328	1087	935		1792	1192
936	2462	2389	911		936	2397	928		936	2581	2384	950	936		2410	987	936	2554	2373	932				936		2399	992		936	2682	2328	1087	936		1792	1192
937	2462	2389	911		937	2397	928		937	2581	2384	950	937		2410	978	937	2554	2373	932				937		2399	992		937	2682	2328	1087	937		1792	1192
938	2462	2389	909		938	2397	928		938	2581	2384	950	938		2410	978	938	2554	2373	922				938		2399	992		938	2682	2328	1087	938		1792	1191
939	2462	2389	909		939	2397	928		939	2581	2384	950	939		2410	978	939	2554	2373	922				939		2399	992		939	2682	2328	1087	939		1792	1191
940	2462	2389	909		940	2397	928		940	2581	2384	946	940		2410	978	940	2554	2373	922				940		2399	992		940	2682	2328	1087	940		1792	1191
941	2462	2389	909		941	2397	911		941	2581	2384	946	941		2410	976	941	2554	2373	922				941		2399	992		941	2682	2328	1087	941		1792	1191
942	2462	2389	909		942	2397	911		942	2581	2384	946	942		2410	976	942	2543	2373	922				942		2399	992		942	2682	2328	1087	942		1792	1191
943	2462	2389	909		943	2397	911		943	2581	2384	946	943		2410	976	943	2543	2373	922				943		2399	992		943	2682	2328	1087	943		1792	1191
944	2462	2389	909		944	2397	911		944	2581	2384	946	944		2410	976	944	2543	2373	922				944		2399	992		944	2682	2328	1087	944		1792	1191
945	2462	2389	909		945	2397	911		945	2581	2384	940	945		2410	972	945	2543	2373	922				945		2399	992		945	2682	2328	1087	945		1792	1191
946	2462	2389	909		946	2397	911		946	2581	2384	940	946		2410	972	946	2497	2373	922				946		2399	992		946	2682	2328	1087	946		1792	1191
947	2462	2389	889		947	2397	911		947	2581	2384	940	947		2410	972	947	2497	2373	922				947		2399	992		947	2682	2328	1087	947		1792	1191
948	2462	2389	889		948	2397	911		948	2581	2384	940	948		2410	972	948	2497	2373	920				948		2399	992		948	2682	2328	1087	948		1792	1191
949	2462	2389	889		949	2397	911		949	2581	2384	940	949		2410	972	949	2497	2373	920				949		2399	992		949	2682	2328	1087	949		1792	1191
950	2462	2389	889		950	2397	908		950	2581	2384	940	950		2410	972	950	2497	2373	920				950		2399	983		950	2682	2328	1087	950		1792	1191
951	2462	2389	889		951	2397	908		951	2581	2384	940	951		2410	972	951	2497	2373	920				951		2399	983		951	2682	2328	1087	951		1792	1191
952	2462	2389	889		952	2397	908		952	2581	2384	940	952		2410	972	952	2497	2373	920				952		2399	983		952	2682	2328	1087	952		1792	1191
953	2462	2389	889		953	2397	908		953	2581	2384	940	953		2410	972	953	2497	2373	920				953		2399	983		953	2682	2328	1087	953		1792	1191
954	2462	2389	889		954	2397	908		954	2581	2384	940	954		2410	972	954	2497	2373	920				954		2399	983		954	2682	2328	1082	954		1792	1191
955	2462	2389	888		955	2397	908		955	2581	2384	940	955		2410	972	955	2497	2373	920				955		2399	983		955	2682	2328	1082	955		1792	1191
956	2462	2389	888		956	2397	908		956	2581	2384	940	956		2410	972	956	2497	2373	920				956		2399	983		956	2682	2328	1082	956		1792	1191
957	2462	2389	888		957	2397	908		957	2581	2384	940	957		2410	970	957	2497	2373	920				957		2399	983		957	2682	2328	1082	957		1792	1191
958	2462	2389	888		958	2397	906		958	2581	2384	940	958		2410	969	958	2497	2373	920				958		2399	983		958	2682	2328	1081	958		1792	1191
959	2462	2389	888		959	2397	906		959	2581	2384	940	959		2410	969	959	2497	2373	920				959		2399	983		959	2682	2328	1081	959		1792	1191
960	2462	2389	888		960	2397	906		960	2581	2384	940	960		2410	969	960	2497	2373	920				960		2399	983		960	2682	2328	1081	960		1792	1187
961	2462	2389	888		961	2397	906		961	2581	2384	940	961		2410	969	961	2497	2373	920				961		2399	980		961	2682	2328	1081	961		1792	1187
962	2462	2389	888		962	2397	906		962	2581	2384	940	962		2410	969	962	2497	2373	920				962		2399	980		962	2682	2328	1079	962		1792	1177
963	2462	2389	888		963	2397	906		963	2581	2384	940	963		2410	969	963	2497	2373	920				963		2399	980		963	2682	2328	1079	963		1792	1177
964	2462	2389	888		964	2397	906		964	2581	2384	938	964		2410	969	964	2497	2373	920				964		2399	980		964	2682	2328	1079	964		1792	1177
965	2462	2389	880		965	2397	906		965	2581	2384	938	965		2410	966	965	2497	2373	920				965		2399	980		965	2682	2328	1079	965		1792	1177
966	2462	2389	880		966	2397	906		966	2581	2384	938	966		2410	966	966	2497	2373	920				966		2399	980		966	2682	2328	1079	966		1792	1177
967	2462	2389	880		967	2397	906		967	2581	2384	938	967		2410	966	967	2497	2373	920				967		2399	980		967	2682	2328	1079	967		1792	1177
968	2462	2389	880		968	2397	906		968	2581	2384	938	968		2410	966	968	2497	2373	920				968		2399	975		968	2682	2328	1079	968		1792	1177
969	2462	2389	880		969	2397	906		969	2581	2384	938	969		2410	966	969	2497	2373	917				969		2399	975		969	2682	2328	1079	969		1792	1177
970	2462	2389	880		970	2397	906		970	2581	2384	938	970		2410	966	970	2497	2373	917				970		2399	975		970	2682	2328	1079	970		1792	1177
971	2462	2389	868		971	2397	906		971	2581	2384	938	971		2410	966	971	2497	2373	917				971		2399	975		971	2682	2328	1079	971		1792	1177
972	2462	2389	868		972	2397	903		972	2581	2384	938	972		2410	966	972	2497	2373	917				972		2399	975		972	2682	2328	1079	972		1792	1177
973	2462	2389	868		973	2397	903		973	2581	2384	938	973		2410	966	973	2497	2373	917				973		2399	975		973	2682	2328	1079	973		1792	1177
974	2462	2389	868		974	2397	903		974	2581	2384	938	974		2410	966	974	2497	2373	917				974		2399	975		974	2682	2328	1070	974		1792	1177
975	2462	2389	868		975	2397	903		975	2581	2384	938	975		2410	966	975	2497	2373	917				975		2399	975		975	2682	2328	1070	975		1792	1177
976	2462	2389	868		976	2397	900		976	2581	2384	938	976		2410	963	976	2497	2373	917				976		2399	975		976	2682	2328	1070	976		1792	1177
977	2457	2389	868		977	2397	900		977	2581	2384	933	977		2410	963	977	2497	2373	917				977		2399	975		977	2682	2328	1070	977		1792	1177
978	2457	2389	868		978	2397	900		978	2581	2384	933	978		2410	961	978	2497	2373	914				978		2399	975		978	2682	2328	1070	978		1792	1177
979	2457	2389	868		979	2397	900		979	2581	2384	933	979		2410	961	979	2497	2373	914				979		2399	975		979	2682	2328	1070	979		1792	1177
980	2457	2389	868		980	2397	900		980	2581	2384	928	980		2410	961	980	2497	2373	898				980		2399	975		980	2682	2328	1070	980		1792	1177
981	2457	2389	868		981	2397	900		981	2581	2384	928	981		2410	960	981	2497	2349	898				981		2399	975		981	2669	2328	1070	981		1792	1177
982	2457	2389	868		982	2397	900		982	2581	2384	928	982		2410	960	982	2497	2349	898				982		2399	975		982	2669	2328	1070	982		1792	1177
983	2457	2389	868		983	2397	900		983	2581	2384	928	983		2410	960	983	2497	2349	898				983		2399	975		983	2669	2328	1070	983		1792	1177
984	2457	2389	868		984	2397	900		984	2581	2384	928	984		2410	960	984	2497	2349	898				984		2399	975		984	2669	2328	1070	984		1792	1177
985	2457	2389	868		985	2397	900		985	2581	2384	928	985		2410	960	985	2497	2349	898				985		2399	975		985	2669	2328	1070	985		1792	1177
986	2457	2389	868		986	2397	900		986	2581	2384	928	986		2410	953	986	2497	2349	898				986		2399	975		986	2669	2328	1070	986		1792	1177
987	2457	2389	868		987	2397	900		987	2581	2384	928	987		2410	953	987	2497	2349	898				987		2399	975		987	2669	2328	1070	987		1792	1177
988	2457	2389	868		988	2397	900		988	2581	2384	928	988		2410	953	988	2497	2349	898				988		2399	975		988	2669	2328	1070	988		1792	1177
989	2457	2389	868		989	2397	900		989	2581	2384	928	989		2410	953	989	2497	2349	898				989		2399	975		989	2669	2328	1070	989		1792	1177
990	2457	2389	868		990	2397	900		990	2581	2384	928	990		2410	950	990	2488	2349	898				990		2399	975		990	2669	2328	1070	990		1792	1177
991	2457	2389	868		991	2397	900		991	2581	2384	928	991		2410	950	991	2488	2349	898				991		2399	975		991	2669	2328	1070	991		1792	1177
992	2457	2389	868		992	2397	896		992	2581	2384	928	992		2410	931	992	2488	2349	898				992		2399	973		992	2669	2328	1070	992		1792	1177
993	2457	2389	868		993	2397	896		993	2581	2384	928	993		2410	931	993	2488	2349	898				993		2399	973		993	2669	2328	1070	993		1792	1177
994	2457	2389	868		994	2397	896		994	2581	2384	928	994		2410	931	994	2488	2349	897				994		2399	973		994	2669	2328	1068	994		1792	1177
995	2457	2389	866		995	2397	893		995	2581	2384	928	995		2410	931	995	2488	2349	897				995		2399	973		995	2669	2328	1068	995		1792	1177
996	2457	2389	866		996	2397	893		996	2581	2384	925	996		2410	931	996	2488	2349	897				996		2399	973		996	2669	2328	1068	996		1792	1177
997	2457	2389	866		997	2397	893		997	2581	2384	925	997		2410	931	997	2488	2349	897				997		2399	973		997	2669	2328	1068	997		1792	1177
998	2457	2389	866		998	2397	893		998	2581	2384	925	998		2410	931	998	2488	2349	897				998		2399	973		998	2669	2328	1068	998		1792	1177
999	2457	2389	866		999	2397	893		999	2581	2384	925	999		2410	931	999	2488	2349	897				999		2399	973		999	2669	2328	1068	999		1792	1177
1000	2457		866		1000		893		1000	2581	2384	925	1000		2410	931	1000	2488	2349	897				1000		2399	973		1000	2669	2328	1068	1000		1792	1177

## Sheet: Convergence20
	Scenario 1					Scenario 2				Scenario 3				Scenario 4				Scenario 5							Scenario 6					Scenario 7				Scenario 8
	BWO	HS	HSBWO			HS	HSBWO			BWO	HS	HSBWO			HS	HSBWO		BWO	HS	HSBWO						HS	HSBWO			BWO	HS	HSBWO			HS	HSBWO
0	5240	2879	3785		0	2707	4640		0	6130	2943	3555	0		2947	4770	0	5020	3219	4455				0		3195	4665		0	4990	3135	4760	0		3019	3700
1	4399	2822	3680		1	2707	3670		1	4136	2915	3555	1		2907	3635	1	4115	3219	3485				1		2891	3560		1	4059	3135	3945	1		3019	3700
2	3707	2822	3680		2	2707	3670		2	3864	2915	3555	2		2828	3635	2	4115	2961	3485				2		2891	3560		2	3762	3135	3945	2		2950	3700
3	3707	2802	3625		3	2707	3670		3	3410	2915	3380	3		2828	3580	3	3652	2961	3485				3		2891	3560		3	3711	3135	3263	3		2950	3202
4	3411	2664	2729		4	2687	2861		4	3410	2915	3102	4		2828	3047	4	3652	2961	3331				4		2891	3085		4	3305	3135	3263	4		2950	3202
5	3207	2664	2729		5	2676	2861		5	3193	2864	3102	5		2828	3047	5	3269	2961	3331				5		2891	3085		5	3211	3135	3263	5		2950	3202
6	3190	2664	2729		6	2667	2861		6	3193	2864	3102	6		2780	3047	6	3169	2961	3331				6		2863	3085		6	3211	3135	3263	6		2950	3202
7	3190	2664	2710		7	2667	2861		7	3193	2827	3102	7		2780	3047	7	3169	2889	3331				7		2863	3085		7	3211	3135	3236	7		2950	2940
8	3190	2664	2710		8	2667	2861		8	3193	2827	3102	8		2780	3047	8	3169	2889	3331				8		2863	3085		8	3211	3135	3236	8		2950	2940
9	3190	2664	2710		9	2667	2807		9	3193	2827	2970	9		2780	2935	9	3169	2889	3138				9		2863	3000		9	3211	3067	3236	9		2950	2940
10	3190	2664	2710		10	2581	2807		10	3193	2827	2970	10		2780	2935	10	3169	2889	3138				10		2863	3000		10	3211	3067	3236	10		2950	2940
11	3190	2664	2710		11	2581	2807		11	3193	2827	2970	11		2772	2935	11	3169	2889	3138				11		2863	3000		11	3211	3067	3236	11		2950	2940
12	3190	2664	2710		12	2581	2807		12	3153	2745	2970	12		2772	2935	12	3051	2889	3138				12		2863	3000		12	3211	2962	3236	12		2904	2940
13	3190	2655	2710		13	2581	2807		13	3153	2720	2970	13		2675	2935	13	3051	2889	3138				13		2764	3000		13	3211	2962	3236	13		2904	2940
14	3190	2655	2659		14	2581	2670		14	3153	2720	2858	14		2675	2931	14	3051	2889	2968				14		2764	2994		14	3211	2962	3236	14		2904	2940
15	3190	2645	2659		15	2581	2670		15	3153	2720	2858	15		2675	2931	15	3051	2889	2968				15		2764	2994		15	3137	2962	3236	15		2876	2940
16	3190	2645	2659		16	2581	2670		16	3153	2720	2858	16		2675	2931	16	3051	2889	2968				16		2683	2994		16	3137	2962	3236	16		2876	2940
17	3190	2645	2659		17	2581	2670		17	3153	2720	2858	17		2675	2931	17	3051	2889	2968				17		2683	2994		17	3084	2962	3236	17		2858	2940
18	3190	2645	2659		18	2581	2670		18	3153	2720	2858	18		2675	2931	18	3051	2837	2968				18		2683	2994		18	3084	2962	3236	18		2858	2940
19	3190	2645	2659		19	2581	2670		19	3153	2636	2858	19		2658	2801	19	3051	2837	2968				19		2683	2841		19	3080	2962	3229	19		2810	2940
20	3190	2566	2659		20	2544	2670		20	3153	2636	2858	20		2658	2801	20	3051	2764	2968				20		2683	2841		20	3076	2962	3229	20		2810	2940
21	3190	2566	2659		21	2544	2670		21	3153	2636	2858	21		2655	2801	21	3051	2764	2968				21		2647	2841		21	3076	2962	3229	21		2719	2940
22	3190	2566	2659		22	2544	2670		22	3153	2636	2858	22		2655	2801	22	3051	2764	2968				22		2647	2841		22	3076	2962	3229	22		2719	2940
23	3190	2566	2659		23	2544	2670		23	3153	2636	2858	23		2655	2801	23	3051	2764	2968				23		2647	2841		23	3076	2962	3229	23		2719	2940
24	3190	2566	2659		24	2544	2670		24	3153	2636	2856	24		2636	2801	24	3051	2764	2968				24		2647	2830		24	3074	2834	3229	24		2719	2940
25	3190	2566	2659		25	2544	2670		25	3153	2636	2856	25		2636	2801	25	3051	2764	2968				25		2647	2830		25	3074	2834	3229	25		2719	2940
26	3190	2566	2659		26	2544	2670		26	3153	2620	2856	26		2636	2801	26	3051	2764	2968				26		2647	2830		26	2986	2825	3229	26		2719	2940
27	3190	2560	2656		27	2544	2670		27	3153	2620	2856	27		2633	2801	27	3029	2688	2968				27		2647	2830		27	2986	2825	3091	27		2719	2940
28	3190	2560	2656		28	2544	2670		28	3153	2620	2856	28		2627	2801	28	3029	2688	2968				28		2647	2830		28	2986	2825	2595	28		2719	2940
29	3190	2560	2656		29	2544	2598		29	3153	2620	2856	29		2627	2801	29	3029	2681	2968				29		2647	2830		29	2875	2779	2595	29		2719	2940
30	3190	2560	2656		30	2518	2569		30	3153	2620	2856	30		2627	2801	30	3029	2681	2968				30		2612	2830		30	2875	2779	2595	30		2719	2940
31	3190	2560	2656		31	2518	2569		31	3153	2597	2856	31		2627	2801	31	3029	2681	2968				31		2612	2830		31	2875	2779	2595	31		2719	2940
32	3190	2537	2656		32	2518	2569		32	3153	2597	2856	32		2627	2801	32	3029	2681	2968				32		2571	2830		32	2875	2779	2595	32		2692	2453
33	3190	2537	2656		33	2518	2569		33	3153	2597	2856	33		2589	2801	33	3029	2681	2968				33		2571	2830		33	2858	2779	2595	33		2692	2453
34	3190	2537	2656		34	2518	2569		34	3153	2577	2854	34		2589	2801	34	3029	2681	2898				34		2571	2830		34	2858	2779	2595	34		2692	2453
35	3190	2537	2656		35	2518	2569		35	3153	2576	2854	35		2570	2801	35	3029	2681	2898				35		2571	2830		35	2858	2779	2595	35		2692	2453
36	3190	2522	2656		36	2518	2569		36	3153	2560	2849	36		2570	2801	36	3029	2681	2898				36		2571	2830		36	2858	2779	2595	36		2692	2453
37	3190	2522	2656		37	2518	2569		37	3153	2560	2849	37		2570	2801	37	3029	2674	2898				37		2571	2830		37	2858	2779	2595	37		2692	2453
38	3190	2522	2656		38	2518	2569		38	3153	2560	2849	38		2570	2801	38	3029	2670	2898				38		2571	2830		38	2858	2633	2595	38		2683	2453
39	3190	2522	2635		39	2518	2569		39	3153	2560	2849	39		2570	2755	39	3029	2670	2898				39		2571	2687		39	2858	2633	2595	39		2683	2453
40	3190	2508	2635		40	2518	2569		40	3153	2560	2849	40		2570	2755	40	3029	2610	2898				40		2571	2687		40	2858	2633	2595	40		2683	2453
41	3123	2508	2629		41	2518	2569		41	3153	2560	2849	41		2570	2755	41	3029	2610	2898				41		2571	2687		41	2815	2633	2595	41		2683	2453
42	3123	2508	2629		42	2518	2569		42	3153	2560	2849	42		2570	2755	42	3029	2610	2898				42		2571	2687		42	2815	2633	2590	42		2661	2453
43	3123	2508	2629		43	2518	2569		43	3153	2560	2849	43		2556	2755	43	3029	2610	2898				43		2571	2681		43	2815	2633	2590	43		2661	2453
44	3123	2508	2629		44	2518	2569		44	3153	2560	2848	44		2556	2671	44	3029	2610	2872				44		2571	2681		44	2815	2633	2590	44		2647	2453
45	3123	2508	2629		45	2518	2569		45	3153	2560	2848	45		2556	2671	45	3029	2610	2872				45		2571	2681		45	2815	2633	2590	45		2647	2453
46	3123	2508	2629		46	2518	2569		46	3153	2560	2349	46		2556	2671	46	3029	2610	2872				46		2571	2681		46	2815	2633	2590	46		2647	2453
47	3123	2508	2629		47	2518	2569		47	2970	2553	2349	47		2556	2671	47	3029	2610	2872				47		2571	2681		47	2815	2621	2590	47		2647	2453
48	3123	2508	2629		48	2518	2569		48	2970	2553	2349	48		2556	2671	48	3029	2602	2872				48		2571	2681		48	2815	2621	2590	48		2647	2453
49	3123	2508	2629		49	2518	2569		49	2927	2553	2349	49		2556	2671	49	3029	2602	2683				49		2571	2681		49	2815	2621	2590	49		2647	2453
50	3123	2508	2629		50	2518	2569		50	2927	2553	2349	50		2556	2671	50	3029	2602	2683				50		2571	2681		50	2790	2621	2590	50		2647	2453
51	3123	2508	2629		51	2518	2569		51	2927	2553	2349	51		2530	2671	51	3029	2602	2683				51		2571	2681		51	2790	2621	2590	51		2647	2453
52	3123	2508	2629		52	2518	2569		52	2927	2553	2349	52		2530	2671	52	3029	2602	2683				52		2571	2681		52	2749	2621	2579	52		2647	2453
53	3123	2508	2629		53	2518	2569		53	2927	2553	2349	53		2530	2671	53	3029	2602	2683				53		2538	2681		53	2749	2621	2579	53		2647	2453
54	3004	2508	2541		54	2518	2569		54	2927	2553	2349	54		2530	2607	54	3029	2568	2683				54		2538	2663		54	2749	2605	2579	54		2647	2453
55	3004	2508	2541		55	2518	2569		55	2927	2534	2349	55		2530	2607	55	3029	2568	2683				55		2538	2663		55	2749	2605	2579	55		2647	2453
56	3004	2508	2541		56	2518	2569		56	2927	2534	2349	56		2530	2607	56	3029	2568	2683				56		2538	2663		56	2749	2605	2579	56		2647	2453
57	3004	2508	2535		57	2518	2569		57	2910	2534	2349	57		2530	2607	57	3029	2568	2683				57		2538	2663		57	2749	2605	2579	57		2647	2453
58	3004	2508	2535		58	2518	2569		58	2910	2534	2349	58		2530	2607	58	3029	2568	2683				58		2538	2663		58	2749	2605	2579	58		2573	2453
59	3004	2508	2535		59	2518	2569		59	2910	2534	2349	59		2530	2581	59	3029	2568	2683				59		2538	2631		59	2749	2605	2579	59		2573	2453
60	3004	2508	2535		60	2518	2569		60	2910	2534	2349	60		2530	2581	60	3029	2568	2683				60		2538	2631		60	2749	2605	2579	60		2573	2453
61	3004	2508	2535		61	2518	2569		61	2910	2534	2349	61		2530	2581	61	2993	2568	2683				61		2538	2631		61	2749	2605	2579	61		2573	2453
62	3004	2508	2535		62	2518	2569		62	2910	2534	2349	62		2530	2581	62	2993	2568	2683				62		2538	2631		62	2707	2605	2579	62		2573	2453
63	3004	2508	2535		63	2516	2569		63	2910	2534	2349	63		2530	2581	63	2993	2568	2683				63		2538	2631		63	2707	2605	2579	63		2573	2453
64	3004	2508	2535		64	2516	2490		64	2910	2534	2349	64		2530	2581	64	2829	2568	2683				64		2538	2582		64	2707	2605	2579	64		2573	2453
65	3004	2508	2535		65	2516	2490		65	2910	2534	2349	65		2530	2581	65	2829	2568	2683				65		2538	2582		65	2707	2605	2565	65		2573	2453
66	3004	2508	2535		66	2516	2490		66	2910	2534	2349	66		2530	2581	66	2829	2568	2683				66		2538	2582		66	2707	2605	2565	66		2573	2453
67	3004	2508	2535		67	2516	2490		67	2910	2534	2349	67		2530	2581	67	2829	2568	2683				67		2538	2582		67	2707	2599	2565	67		2573	2453
68	3004	2508	2529		68	2516	2490		68	2910	2534	2349	68		2530	2581	68	2829	2568	2683				68		2538	2582		68	2707	2599	2565	68		2573	2453
69	3004	2508	2529		69	2516	2490		69	2910	2534	2349	69		2530	2581	69	2829	2568	2683				69		2538	2529		69	2707	2599	2565	69		2573	2453
70	3004	2508	2529		70	2516	2490		70	2910	2534	2349	70		2530	2581	70	2829	2568	2683				70		2538	2529		70	2707	2598	2565	70		2573	2453
71	3004	2508	2529		71	2516	2490		71	2910	2534	2349	71		2530	2581	71	2829	2568	2683				71		2538	2529		71	2707	2598	2565	71		2573	2453
72	3004	2508	2529		72	2516	2490		72	2910	2534	2349	72		2530	2581	72	2829	2568	2676				72		2538	2529		72	2707	2598	2565	72		2573	2453
73	3004	2508	2529		73	2516	2490		73	2910	2534	2349	73		2530	2581	73	2829	2568	2676				73		2538	2529		73	2707	2598	2565	73		2573	2453
74	3004	2508	2529		74	2516	2490		74	2910	2534	2349	74		2530	2581	74	2829	2568	2676				74		2538	2529		74	2707	2598	2565	74		2573	2453
75	3004	2508	2529		75	2498	2490		75	2910	2534	2349	75		2530	2581	75	2829	2568	2676				75		2538	2529		75	2707	2598	2565	75		2573	2453
76	3004	2508	2529		76	2498	2490		76	2910	2534	2307	76		2515	2581	76	2829	2568	2676				76		2538	2529		76	2707	2598	2565	76		2573	2453
77	3004	2508	2529		77	2498	2490		77	2910	2534	2307	77		2515	2581	77	2829	2568	2676				77		2538	2529		77	2707	2598	2565	77		2573	2453
78	3004	2508	2529		78	2498	2490		78	2910	2534	2307	78		2515	2581	78	2829	2568	2676				78		2538	2529		78	2707	2598	2565	78		2573	2453
79	3004	2508	2529		79	2498	2490		79	2910	2534	2307	79		2515	2581	79	2829	2568	2676				79		2506	2529		79	2707	2598	2565	79		2573	2453
80	3004	2508	2529		80	2498	2486		80	2910	2534	2307	80		2515	2581	80	2829	2568	2676				80		2506	2529		80	2707	2598	2565	80		2573	2453
81	3004	2508	2529		81	2498	2486		81	2910	2534	2307	81		2515	2581	81	2829	2568	2676				81		2506	2529		81	2707	2598	2565	81		2573	2453
82	2966	2508	2529		82	2498	2486		82	2910	2534	2307	82		2515	2581	82	2829	2568	2640				82		2506	2529		82	2707	2598	2565	82		2573	2453
83	2966	2508	2529		83	2498	2486		83	2910	2534	2307	83		2515	2581	83	2829	2568	2640				83		2506	2529		83	2707	2598	2565	83		2573	2453
84	2966	2464	2529		84	2498	2486		84	2910	2534	2307	84		2515	2581	84	2829	2568	2640				84		2506	2529		84	2707	2598	2565	84		2573	2453
85	2966	2464	2529		85	2486	2486		85	2910	2534	2307	85		2515	2581	85	2829	2568	2640				85		2506	2529		85	2707	2556	2565	85		2573	2453
86	2966	2464	2529		86	2486	2486		86	2910	2534	2307	86		2515	2581	86	2829	2568	2640				86		2506	2529		86	2707	2556	2565	86		2573	2453
87	2966	2464	2529		87	2486	2486		87	2910	2534	2307	87		2515	2581	87	2829	2568	2640				87		2506	2529		87	2707	2540	2565	87		2573	2453
88	2902	2464	2529		88	2486	2484		88	2910	2534	2307	88		2515	2581	88	2829	2568	2640				88		2506	2529		88	2707	2540	2565	88		2573	2453
89	2902	2464	2529		89	2486	2484		89	2910	2534	2307	89		2515	2581	89	2806	2568	2640				89		2506	2529		89	2707	2540	2565	89		2573	2453
90	2902	2464	2529		90	2486	2484		90	2910	2534	2307	90		2515	2581	90	2806	2568	2640				90		2506	2529		90	2707	2540	2565	90		2573	2453
91	2902	2464	2529		91	2486	2484		91	2910	2534	2270	91		2515	2581	91	2806	2568	2640				91		2506	2529		91	2707	2540	2565	91		2573	2453
92	2902	2464	2529		92	2486	2484		92	2863	2531	2270	92		2515	2581	92	2806	2568	2640				92		2506	2529		92	2707	2540	2565	92		2573	2453
93	2902	2464	2529		93	2486	2484		93	2863	2512	2270	93		2515	2581	93	2806	2568	2640				93		2506	2529		93	2707	2540	2565	93		2573	2453
94	2902	2464	2529		94	2486	2484		94	2863	2512	2270	94		2515	2581	94	2806	2568	2640				94		2506	2529		94	2707	2540	2565	94		2573	2453
95	2902	2464	2529		95	2486	2484		95	2863	2512	2270	95		2515	2581	95	2806	2568	2640				95		2506	2529		95	2707	2540	2565	95		2573	2453
96	2902	2464	2529		96	2486	2479		96	2863	2512	2260	96		2487	2580	96	2806	2568	2629				96		2506	2529		96	2707	2540	2565	96		2573	2453
97	2902	2464	2529		97	2486	2479		97	2863	2512	2260	97		2487	2580	97	2806	2568	2627				97		2506	2529		97	2707	2540	2560	97		2573	2453
98	2902	2464	2529		98	2486	2479		98	2863	2512	2260	98		2487	2580	98	2806	2568	2627				98		2506	2529		98	2707	2540	2560	98		2573	2453
99	2902	2464	2529		99	2486	2479		99	2863	2512	2260	99		2487	2541	99	2806	2568	2627				99		2506	2529		99	2707	2540	2560	99		2573	2453
100	2902	2464	2529		100	2486	2479		100	2863	2512	2260	100		2487	2541	100	2806	2568	2627				100		2506	2529		100	2707	2540	2540	100		2573	2453
101	2902	2464	2529		101	2486	2479		101	2863	2512	2260	101		2487	2541	101	2806	2568	2627				101		2506	2529		101	2707	2533	2540	101		2573	2453
102	2902	2464	2529		102	2486	2479		102	2811	2512	2260	102		2487	2540	102	2806	2568	2599				102		2506	2529		102	2707	2533	2540	102		2573	2453
103	2902	2464	2516		103	2486	2479		103	2811	2512	2260	103		2487	2540	103	2806	2568	2599				103		2506	2529		103	2707	2533	2540	103		2573	2453
104	2902	2464	2516		104	2486	2479		104	2811	2512	2260	104		2487	2540	104	2806	2568	2599				104		2506	2529		104	2707	2533	2540	104		2562	2453
105	2902	2464	2516		105	2486	2479		105	2811	2497	2260	105		2487	2540	105	2806	2568	2599				105		2506	2529		105	2707	2533	2540	105		2562	2453
106	2902	2464	2516		106	2486	2479		106	2811	2497	2260	106		2487	2540	106	2806	2568	2599				106		2506	2529		106	2707	2533	2540	106		2562	2453
107	2902	2464	2516		107	2486	2479		107	2811	2497	2260	107		2487	2540	107	2806	2568	2599				107		2506	2529		107	2707	2533	2540	107		2562	2453
108	2902	2464	2516		108	2486	2479		108	2811	2497	2260	108		2487	2540	108	2806	2568	2599				108		2506	2529		108	2707	2533	2540	108		2562	2453
109	2902	2464	2508		109	2486	2479		109	2811	2497	2260	109		2487	2540	109	2806	2568	2599				109		2506	2529		109	2707	2533	2540	109		2562	2453
110	2902	2464	2508		110	2480	2479		110	2811	2497	2260	110		2487	2540	110	2806	2568	2599				110		2506	2529		110	2707	2533	2540	110		2562	2453
111	2847	2464	2508		111	2480	2479		111	2811	2497	2260	111		2487	2540	111	2806	2568	2599				111		2506	2529		111	2707	2533	2540	111		2562	2453
112	2847	2464	2508		112	2480	2479		112	2811	2497	2260	112		2487	2540	112	2806	2568	2599				112		2506	2529		112	2707	2533	2540	112		2562	2453
113	2847	2464	2508		113	2480	2479		113	2811	2497	2260	113		2487	2540	113	2806	2568	2575				113		2506	2529		113	2707	2533	2540	113		2562	2453
114	2847	2464	2508		114	2480	2479		114	2811	2497	2260	114		2487	2540	114	2806	2568	2575				114		2506	2529		114	2707	2533	2540	114		2562	2453
115	2847	2464	2508		115	2480	2475		115	2811	2497	2260	115		2487	2540	115	2802	2568	2575				115		2506	2529		115	2707	2533	2540	115		2562	2453
116	2847	2464	2508		116	2480	2475		116	2811	2497	2260	116		2487	2540	116	2802	2568	2575				116		2506	2529		116	2707	2533	2540	116		2562	2453
117	2847	2464	2508		117	2480	2472		117	2811	2497	2260	117		2487	2535	117	2802	2568	2575				117		2506	2529		117	2707	2533	2540	117		2562	2453
118	2847	2464	2508		118	2480	2472		118	2811	2497	2260	118		2487	2535	118	2802	2565	2575				118		2506	2529		118	2707	2533	2540	118		2562	2453
119	2847	2464	2508		119	2480	2472		119	2811	2497	2260	119		2487	2535	119	2802	2546	2575				119		2506	2529		119	2707	2533	2540	119		2562	2453
120	2847	2464	2508		120	2480	2472		120	2811	2497	2260	120		2487	2535	120	2802	2546	2575				120		2506	2529		120	2707	2533	2540	120		2562	2453
121	2847	2464	2508		121	2480	2472		121	2811	2497	2260	121		2487	2535	121	2802	2546	2569				121		2506	2523		121	2707	2533	2540	121		2562	2453
122	2847	2464	2508		122	2480	2472		122	2811	2497	2260	122		2487	2535	122	2802	2546	2569				122		2506	2523		122	2707	2533	2540	122		2562	2453
123	2847	2464	2508		123	2480	2467		123	2811	2497	2260	123		2487	2535	123	2802	2546	2569				123		2506	2523		123	2682	2533	2540	123		2562	2453
124	2847	2464	2508		124	2480	2467		124	2811	2497	2260	124		2487	2535	124	2802	2546	2569				124		2506	2523		124	2682	2530	2540	124		2562	2410
125	2847	2464	2508		125	2480	2467		125	2811	2497	2260	125		2487	2535	125	2802	2546	2569				125		2506	2523		125	2682	2530	2540	125		2562	2410
126	2847	2464	2508		126	2480	2467		126	2811	2497	2260	126		2487	2535	126	2802	2546	2569				126		2506	2523		126	2682	2530	2540	126		2562	2410
127	2847	2464	2508		127	2480	2467		127	2811	2497	2260	127		2487	2535	127	2802	2546	2569				127		2506	2523		127	2682	2530	2540	127		2557	2410
128	2847	2464	2508		128	2480	2467		128	2811	2490	2260	128		2487	2535	128	2802	2546	2569				128		2506	2523		128	2682	2530	2540	128		2557	2410
129	2847	2464	2508		129	2480	2467		129	2811	2490	2260	129		2487	2532	129	2802	2546	2569				129		2506	2523		129	2682	2530	2540	129		2557	2410
130	2847	2464	2508		130	2480	2467		130	2811	2490	2260	130		2487	2532	130	2802	2528	2569				130		2506	2523		130	2682	2530	2535	130		2557	2410
131	2847	2464	2508		131	2480	2467		131	2811	2490	2260	131		2487	2532	131	2802	2528	2569				131		2506	2523		131	2682	2530	2535	131		2557	2410
132	2847	2464	2508		132	2480	2467		132	2811	2490	2260	132		2487	2532	132	2802	2528	2562				132		2496	2523		132	2682	2530	2515	132		2557	2410
133	2847	2464	2508		133	2480	2467		133	2811	2490	2260	133		2487	2532	133	2802	2528	2562				133		2496	2523		133	2682	2530	2515	133		2557	2410
134	2847	2464	2461		134	2480	2467		134	2811	2490	2260	134		2487	2532	134	2802	2528	2562				134		2496	2523		134	2682	2530	2515	134		2557	2410
135	2847	2464	2461		135	2480	2467		135	2811	2490	2260	135		2486	2532	135	2802	2528	2562				135		2496	2523		135	2682	2515	2515	135		2557	2410
136	2847	2464	2461		136	2480	2467		136	2811	2490	2260	136		2486	2532	136	2802	2528	2562				136		2496	2523		136	2682	2515	2510	136		2557	2410
137	2847	2464	2461		137	2480	2467		137	2811	2490	2251	137		2486	2532	137	2802	2528	2562				137		2496	2523		137	2682	2515	2510	137		2557	2394
138	2847	2464	2461		138	2480	2467		138	2800	2490	2251	138		2486	2532	138	2802	2528	2559				138		2496	2523		138	2682	2515	2510	138		2557	2394
139	2847	2464	2461		139	2480	2467		139	2800	2490	2251	139		2486	2532	139	2802	2528	2559				139		2496	2523		139	2682	2515	2510	139		2557	2394
140	2847	2464	2461		140	2480	2467		140	2800	2490	2251	140		2486	2532	140	2802	2528	2559				140		2496	2523		140	2682	2515	2510	140		2557	2394
141	2847	2464	2461		141	2480	2467		141	2800	2490	2251	141		2486	2532	141	2802	2528	2559				141		2496	2523		141	2682	2515	2510	141		2557	2394
142	2847	2464	2461		142	2480	2467		142	2800	2490	2251	142		2486	2529	142	2802	2528	2559				142		2496	2523		142	2682	2515	2510	142		2557	2394
143	2818	2464	2461		143	2480	2467		143	2800	2490	2251	143		2486	2529	143	2802	2528	2559				143		2496	2523		143	2682	2515	2510	143		2557	2394
144	2818	2464	2461		144	2480	2467		144	2800	2490	2251	144		2486	2529	144	2802	2528	2559				144		2496	2523		144	2682	2515	2510	144		2557	2394
145	2818	2464	2461		145	2480	2455		145	2800	2490	2251	145		2486	2529	145	2802	2528	2559				145		2496	2523		145	2682	2515	2510	145		2545	2394
146	2818	2464	2461		146	2480	2455		146	2800	2490	2251	146		2486	2529	146	2802	2528	2544				146		2492	2523		146	2682	2515	2510	146		2545	2394
147	2818	2464	2461		147	2480	2455		147	2800	2490	2231	147		2486	2529	147	2802	2528	2544				147		2492	2523		147	2682	2515	2510	147		2545	2394
148	2818	2464	2461		148	2480	2455		148	2800	2490	2231	148		2486	2526	148	2802	2528	2544				148		2492	2523		148	2682	2515	2510	148		2545	2394
149	2818	2464	2461		149	2480	2455		149	2800	2490	2231	149		2486	2526	149	2802	2528	2544				149		2492	2523		149	2682	2515	2510	149		2545	2394
150	2818	2464	2461		150	2480	2455		150	2800	2490	2231	150		2486	2526	150	2802	2528	2544				150		2492	2523		150	2682	2515	2510	150		2545	2394
151	2818	2464	2461		151	2480	2455		151	2800	2490	2231	151		2486	2526	151	2802	2528	2544				151		2492	2523		151	2682	2515	2510	151		2545	2394
152	2818	2464	2461		152	2480	2455		152	2800	2490	2231	152		2486	2526	152	2802	2528	2544				152		2492	2523		152	2682	2515	2510	152		2545	2394
153	2818	2464	2461		153	2480	2455		153	2800	2490	2231	153		2486	2526	153	2802	2528	2544				153		2492	2523		153	2682	2515	2510	153		2545	2394
154	2818	2464	2461		154	2480	2455		154	2800	2490	2231	154		2486	2475	154	2802	2528	2544				154		2469	2523		154	2682	2515	2510	154		2545	2394
155	2818	2464	2461		155	2480	2455		155	2800	2490	2231	155		2486	2475	155	2802	2528	2544				155		2469	2523		155	2682	2515	2510	155		2538	2394
156	2818	2433	2461		156	2480	2455		156	2800	2490	2206	156		2486	2475	156	2802	2528	2544				156		2469	2523		156	2682	2515	2510	156		2528	2394
157	2809	2433	2461		157	2480	2455		157	2800	2490	2206	157		2486	2475	157	2802	2528	2544				157		2469	2523		157	2682	2515	2500	157		2528	2394
158	2809	2433	2461		158	2480	2455		158	2800	2490	2206	158		2486	2475	158	2802	2528	2544				158		2469	2523		158	2682	2515	2500	158		2528	2394
159	2809	2433	2461		159	2480	2455		159	2800	2490	2206	159		2486	2475	159	2802	2528	2544				159		2469	2523		159	2682	2515	2500	159		2528	2394
160	2809	2433	2461		160	2480	2455		160	2800	2490	2206	160		2486	2475	160	2802	2528	2544				160		2469	2523		160	2682	2515	2500	160		2528	2394
161	2809	2433	2461		161	2480	2455		161	2800	2490	2206	161		2486	2475	161	2802	2528	2544				161		2469	2523		161	2682	2515	2500	161		2528	2392
162	2809	2433	2461		162	2480	2455		162	2800	2490	2206	162		2486	2475	162	2802	2528	2544				162		2469	2523		162	2682	2515	2500	162		2528	2378
163	2809	2433	2461		163	2480	2455		163	2800	2490	2206	163		2486	2475	163	2802	2528	2544				163		2469	2523		163	2682	2498	2500	163		2528	2378
164	2809	2433	2461		164	2480	2455		164	2800	2490	2206	164		2486	2475	164	2802	2528	2544				164		2469	2523		164	2682	2498	2500	164		2528	2344
165	2809	2433	2461		165	2480	2455		165	2800	2490	2201	165		2486	2475	165	2802	2528	2544				165		2469	2523		165	2682	2498	2500	165		2528	2344
166	2809	2433	2461		166	2480	2455		166	2800	2490	2201	166		2486	2475	166	2802	2528	2544				166		2469	2523		166	2682	2498	2500	166		2528	2344
167	2809	2433	2461		167	2480	2455		167	2800	2490	2201	167		2486	2475	167	2802	2528	2544				167		2469	2523		167	2682	2498	2500	167		2528	2344
168	2809	2433	2461		168	2480	2455		168	2800	2490	2201	168		2486	2475	168	2802	2528	2544				168		2469	2523		168	2682	2498	2500	168		2528	2344
169	2809	2433	2461		169	2480	2455		169	2800	2490	2201	169		2486	2475	169	2802	2528	2544				169		2469	2523		169	2682	2498	2500	169		2528	2344
170	2809	2433	2461		170	2480	2455		170	2800	2490	2201	170		2486	2475	170	2802	2528	2544				170		2469	2523		170	2682	2498	2500	170		2528	2344
171	2809	2433	2461		171	2480	2455		171	2800	2490	2201	171		2486	2475	171	2802	2528	2544				171		2469	2523		171	2682	2498	2500	171		2502	2344
172	2809	2433	2461		172	2480	2455		172	2800	2490	2201	172		2486	2475	172	2802	2528	2543				172		2469	2523		172	2682	2498	2500	172		2502	2344
173	2809	2433	2461		173	2480	2455		173	2800	2490	2201	173		2486	2475	173	2802	2528	2543				173		2469	2523		173	2682	2498	2500	173		2502	2344
174	2809	2433	2461		174	2480	2455		174	2800	2490	2201	174		2486	2475	174	2802	2520	2543				174		2469	2523		174	2682	2498	2500	174		2502	2344
175	2809	2433	2461		175	2480	2455		175	2800	2490	2201	175		2486	2475	175	2802	2520	2543				175		2469	2523		175	2682	2498	2500	175		2502	2344
176	2809	2433	2461		176	2480	2455		176	2800	2490	2201	176		2486	2475	176	2768	2520	2543				176		2469	2523		176	2682	2498	2500	176		2502	2344
177	2809	2433	2461		177	2480	2455		177	2800	2490	2201	177		2486	2475	177	2768	2520	2543				177		2469	2523		177	2682	2498	2500	177		2502	2344
178	2809	2433	2461		178	2480	2455		178	2800	2490	2201	178		2486	2475	178	2768	2520	2543				178		2469	2523		178	2682	2498	2500	178		2502	2344
179	2809	2433	2461		179	2480	2455		179	2800	2490	2201	179		2486	2475	179	2768	2520	2543				179		2469	2523		179	2682	2498	2500	179		2502	2344
180	2809	2433	2461		180	2480	2453		180	2800	2490	2201	180		2486	2471	180	2768	2520	2543				180		2469	2523		180	2682	2498	2500	180		2502	2344
181	2809	2433	2461		181	2480	2453		181	2800	2490	2168	181		2486	2471	181	2768	2520	2543				181		2469	2523		181	2682	2498	2500	181		2502	2344
182	2809	2433	2461		182	2480	2453		182	2800	2490	2168	182		2486	2471	182	2768	2508	2543				182		2469	2523		182	2682	2498	2500	182		2502	2344
183	2809	2433	2461		183	2480	2453		183	2800	2490	2168	183		2486	2471	183	2768	2508	2538				183		2469	2518		183	2682	2498	2500	183		2502	2344
184	2809	2433	2461		184	2480	2453		184	2800	2490	2168	184		2486	2471	184	2768	2508	2538				184		2469	2518		184	2682	2498	2495	184		2502	2344
185	2798	2433	2461		185	2480	2453		185	2800	2490	2168	185		2486	2471	185	2768	2508	2538				185		2469	2518		185	2682	2498	2495	185		2502	2344
186	2798	2433	2461		186	2480	2453		186	2800	2490	2168	186		2486	2471	186	2768	2508	2538				186		2469	2518		186	2682	2498	2495	186		2502	2344
187	2780	2433	2460		187	2480	2453		187	2800	2490	2168	187		2486	2471	187	2768	2508	2538				187		2469	2518		187	2682	2498	2495	187		2502	2344
188	2780	2433	2460		188	2480	2453		188	2800	2490	2168	188		2486	2471	188	2768	2508	2538				188		2469	2518		188	2682	2498	2495	188		2502	2344
189	2780	2433	2460		189	2480	2453		189	2800	2490	2168	189		2486	2471	189	2768	2508	2538				189		2469	2518		189	2682	2498	2490	189		2502	2344
190	2780	2433	2460		190	2480	2453		190	2800	2490	2168	190		2486	2471	190	2768	2508	2538				190		2469	2518		190	2682	2498	2490	190		2502	2344
191	2780	2433	2460		191	2480	2453		191	2800	2490	2168	191		2486	2471	191	2768	2508	2538				191		2469	2518		191	2682	2498	2490	191		2502	2344
192	2780	2433	2460		192	2480	2453		192	2800	2490	2168	192		2486	2471	192	2768	2508	2538				192		2469	2513		192	2682	2498	2490	192		2502	2344
193	2780	2433	2460		193	2480	2453		193	2800	2477	2168	193		2486	2471	193	2768	2508	2538				193		2469	2513		193	2682	2492	2490	193		2502	2344
194	2780	2433	2460		194	2480	2453		194	2800	2477	2168	194		2486	2471	194	2768	2508	2538				194		2469	2513		194	2682	2492	2490	194		2502	2344
195	2780	2433	2460		195	2480	2452		195	2800	2477	2168	195		2486	2471	195	2768	2508	2514				195		2469	2513		195	2682	2492	2490	195		2502	2344
196	2780	2433	2453		196	2480	2452		196	2800	2477	2168	196		2486	2470	196	2768	2508	2514				196		2469	2513		196	2682	2492	2490	196		2502	2336
197	2780	2433	2453		197	2480	2452		197	2800	2477	2168	197		2486	2470	197	2768	2508	2514				197		2469	2513		197	2682	2492	2490	197		2502	2336
198	2780	2433	2453		198	2480	2452		198	2800	2477	2168	198		2486	2470	198	2768	2508	2514				198		2469	2513		198	2682	2492	2490	198		2502	2336
199	2780	2433	2453		199	2480	2452		199	2800	2477	2168	199		2486	2470	199	2768	2508	2514				199		2469	2513		199	2682	2492	2490	199		2502	2336
200	2780	2433	2453		200	2480	2452		200	2800	2477	2168	200		2486	2470	200	2768	2508	2514				200		2469	2493		200	2682	2492	2490	200		2502	2336
201	2780	2433	2453		201	2480	2452		201	2800	2477	2168	201		2486	2470	201	2768	2508	2514				201		2469	2493		201	2682	2492	2490	201		2502	2336
202	2780	2433	2453		202	2480	2452		202	2800	2477	2168	202		2486	2470	202	2768	2508	2514				202		2469	2493		202	2682	2492	2490	202		2502	2336
203	2780	2433	2453		203	2480	2452		203	2789	2477	2168	203		2486	2470	203	2768	2508	2514				203		2469	2493		203	2682	2492	2004	203		2502	2336
204	2780	2433	2453		204	2480	2452		204	2789	2477	2168	204		2486	2470	204	2768	2508	2514				204		2469	2493		204	2682	2492	2004	204		2502	2336
205	2780	2433	2453		205	2480	2443		205	2789	2477	2168	205		2486	2470	205	2768	2508	2499				205		2469	2493		205	2682	2492	2004	205		2502	2336
206	2780	2433	2453		206	2480	2443		206	2789	2477	2168	206		2486	2470	206	2768	2508	2499				206		2469	2493		206	2682	2492	2004	206		2502	2336
207	2780	2433	2453		207	2480	2443		207	2789	2477	2168	207		2486	2470	207	2768	2508	2499				207		2469	2493		207	2682	2492	2004	207		2502	2336
208	2780	2433	2453		208	2480	2443		208	2789	2477	2168	208		2486	2470	208	2768	2508	2499				208		2469	2493		208	2682	2492	2004	208		2502	2336
209	2780	2433	2453		209	2480	2443		209	2789	2477	2168	209		2486	2470	209	2768	2508	2499				209		2469	2493		209	2682	2492	2004	209		2502	2336
210	2780	2433	2453		210	2480	2443		210	2789	2477	2168	210		2486	2470	210	2768	2508	2499				210		2469	2493		210	2682	2492	2004	210		2502	2336
211	2780	2433	2453		211	2480	2443		211	2789	2477	2168	211		2486	2470	211	2768	2508	2499				211		2469	2493		211	2682	2492	2004	211		2502	2336
212	2780	2433	2453		212	2480	2443		212	2789	2477	2168	212		2486	2470	212	2768	2508	2499				212		2469	2493		212	2682	2492	2004	212		2502	2336
213	2780	2433	2453		213	2480	2443		213	2789	2477	2168	213		2486	2470	213	2765	2490	2499				213		2469	2493		213	2682	2492	2004	213		2502	2336
214	2780	2433	2453		214	2480	2443		214	2789	2477	2168	214		2486	2470	214	2765	2490	2499				214		2469	2493		214	2682	2492	2004	214		2502	2336
215	2780	2433	2453		215	2480	2443		215	2789	2477	2168	215		2486	2470	215	2765	2490	2499				215		2469	2493		215	2682	2451	2004	215		2502	2336
216	2780	2433	2453		216	2480	2443		216	2789	2477	2168	216		2486	2470	216	2765	2490	2499				216		2469	2493		216	2682	2451	2004	216		2502	2336
217	2780	2433	2453		217	2480	2443		217	2789	2477	2168	217		2486	2470	217	2765	2490	2499				217		2469	2493		217	2682	2451	2004	217		2502	2336
218	2780	2433	2453		218	2480	2443		218	2789	2477	2168	218		2486	2470	218	2765	2490	2499				218		2469	2493		218	2682	2451	2004	218		2502	2336
219	2780	2433	2453		219	2480	2443		219	2789	2477	2168	219		2486	2470	219	2765	2490	2499				219		2469	2493		219	2682	2451	2004	219		2502	2336
220	2780	2433	2453		220	2480	2443		220	2789	2477	2168	220		2486	2470	220	2765	2490	2499				220		2469	2493		220	2682	2451	2004	220		2502	2336
221	2780	2433	2453		221	2480	2443		221	2789	2477	2168	221		2486	2470	221	2765	2490	2499				221		2469	2493		221	2682	2451	2004	221		2502	2336
222	2780	2433	2453		222	2480	2443		222	2789	2477	2168	222		2486	2470	222	2711	2490	2499				222		2469	2493		222	2682	2451	2004	222		2502	2336
223	2780	2433	2453		223	2480	2443		223	2789	2477	2168	223		2486	2470	223	2711	2490	2499				223		2469	2493		223	2682	2451	2004	223		2502	2336
224	2780	2433	2453		224	2480	2443		224	2789	2477	2168	224		2486	2470	224	2711	2490	2499				224		2469	2493		224	2682	2451	2004	224		2502	2336
225	2780	2433	2448		225	2480	2443		225	2789	2477	2168	225		2486	2470	225	2711	2490	2499				225		2469	2493		225	2682	2451	2004	225		2502	2336
226	2780	2433	2448		226	2480	2443		226	2789	2477	2168	226		2486	2470	226	2711	2490	2499				226		2469	2493		226	2682	2451	2004	226		2502	2336
227	2780	2433	2448		227	2480	2443		227	2748	2477	2168	227		2486	2470	227	2711	2490	2499				227		2469	2493		227	2682	2451	2004	227		2502	2336
228	2780	2427	2448		228	2480	2438		228	2748	2477	2168	228		2486	2470	228	2711	2490	2493				228		2469	2493		228	2682	2451	2004	228		2502	2336
229	2780	2427	2448		229	2480	2438		229	2748	2477	2168	229		2486	2470	229	2711	2490	2493				229		2469	2493		229	2682	2451	2004	229		2502	2336
230	2780	2427	2448		230	2480	2438		230	2748	2476	2168	230		2486	2470	230	2711	2490	2489				230		2469	2493		230	2682	2451	2004	230		2502	2306
231	2780	2427	2448		231	2480	2438		231	2748	2476	2168	231		2486	2470	231	2711	2490	2489				231		2469	2493		231	2682	2451	2004	231		2502	2306
232	2780	2427	2448		232	2480	2438		232	2748	2476	2168	232		2486	2470	232	2711	2490	2489				232		2469	2493		232	2682	2451	2004	232		2502	2304
233	2780	2427	2448		233	2480	2438		233	2748	2476	2168	233		2486	2470	233	2711	2490	2489				233		2469	2493		233	2682	2451	2004	233		2502	2304
234	2780	2427	2448		234	2480	2438		234	2748	2476	2168	234		2486	2470	234	2711	2490	2489				234		2469	2493		234	2682	2451	2004	234		2502	2304
235	2780	2427	2448		235	2480	2438		235	2748	2476	2168	235		2486	2470	235	2711	2490	2489				235		2469	2493		235	2682	2451	2004	235		2502	2304
236	2780	2427	2448		236	2480	2438		236	2748	2476	2168	236		2486	2470	236	2711	2490	2489				236		2469	2482		236	2682	2451	2004	236		2502	2304
237	2780	2427	2448		237	2480	2438		237	2748	2476	2168	237		2486	2470	237	2711	2490	2489				237		2469	2482		237	2682	2451	2004	237		2501	2304
238	2780	2427	2448		238	2480	2438		238	2748	2467	2143	238		2486	2470	238	2711	2490	2482				238		2469	2482		238	2682	2451	2004	238		2497	2295
239	2780	2427	2448		239	2480	2438		239	2748	2467	2143	239		2486	2470	239	2711	2490	2482				239		2469	2482		239	2682	2451	2004	239		2497	2295
240	2780	2427	2448		240	2480	2438		240	2748	2467	2143	240		2486	2470	240	2711	2490	2482				240		2469	2482		240	2682	2451	2004	240		2497	2295
241	2780	2427	2448		241	2480	2438		241	2748	2467	2143	241		2486	2470	241	2711	2490	2482				241		2469	2482		241	2682	2451	2004	241		2497	2295
242	2780	2427	2448		242	2480	2438		242	2748	2467	2143	242		2486	2470	242	2711	2490	2482				242		2469	2482		242	2682	2451	2004	242		2497	2295
243	2780	2427	2447		243	2480	2438		243	2748	2467	2143	243		2486	2470	243	2711	2490	2482				243		2469	2471		243	2682	2451	2004	243		2497	2295
244	2776	2427	2447		244	2480	2438		244	2748	2467	2143	244		2486	2470	244	2711	2490	2482				244		2469	2471		244	2682	2451	2004	244		2497	2295
245	2776	2427	2447		245	2480	2438		245	2748	2467	2143	245		2486	2470	245	2711	2490	2482				245		2469	2471		245	2682	2451	2004	245		2497	2295
246	2776	2427	2444		246	2480	2438		246	2748	2467	2143	246		2486	2470	246	2711	2490	2482				246		2469	2471		246	2682	2451	2004	246		2497	2295
247	2776	2427	2444		247	2480	2438		247	2748	2467	2143	247		2486	2465	247	2711	2490	2482				247		2469	2471		247	2682	2451	2004	247		2497	2295
248	2776	2427	2444		248	2480	2438		248	2748	2467	2143	248		2486	2465	248	2711	2490	2482				248		2469	2471		248	2682	2451	2004	248		2497	2295
249	2776	2427	2444		249	2480	2438		249	2748	2467	2143	249		2486	2465	249	2711	2490	2482				249		2469	2471		249	2682	2451	2004	249		2497	2295
250	2776	2427	2444		250	2480	2438		250	2748	2467	2143	250		2486	2465	250	2711	2490	2482				250		2469	2471		250	2682	2451	2004	250		2497	2295
251	2776	2427	2444		251	2480	2438		251	2748	2467	2143	251		2486	2465	251	2711	2490	2482				251		2469	2471		251	2682	2451	2004	251		2497	2295
252	2776	2427	2444		252	2480	2438		252	2748	2467	2143	252		2486	2465	252	2711	2490	2482				252		2469	2466		252	2682	2451	2004	252		2497	2295
253	2776	2427	2444		253	2480	2438		253	2748	2467	2143	253		2486	2465	253	2711	2490	2482				253		2469	2466		253	2682	2451	2004	253		2497	2295
254	2776	2427	2444		254	2480	2438		254	2748	2467	2143	254		2486	2465	254	2711	2490	2482				254		2469	2466		254	2682	2451	2004	254		2497	2295
255	2776	2427	2444		255	2480	2438		255	2748	2467	2143	255		2486	2465	255	2711	2490	2444				255		2469	2466		255	2682	2451	2004	255		2497	2295
256	2776	2427	2444		256	2480	2438		256	2748	2467	2143	256		2486	2454	256	2711	2490	2444				256		2469	2466		256	2682	2451	2004	256		2497	2295
257	2776	2427	2444		257	2480	2438		257	2748	2467	2143	257		2486	2454	257	2711	2490	2444				257		2469	2466		257	2682	2451	2004	257		2497	2295
258	2776	2427	2444		258	2480	2438		258	2748	2467	2143	258		2486	2454	258	2711	2490	2444				258		2469	2466		258	2682	2451	2004	258		2497	2295
259	2776	2427	2444		259	2480	2438		259	2748	2467	2143	259		2486	2454	259	2711	2490	2444				259		2469	2466		259	2682	2451	1967	259		2497	2295
260	2776	2427	2444		260	2480	2438		260	2748	2467	2143	260		2486	2454	260	2711	2490	2444				260		2469	2466		260	2682	2451	1967	260		2497	2295
261	2776	2427	2444		261	2480	2438		261	2748	2467	2143	261		2486	2454	261	2711	2490	2444				261		2469	2466		261	2682	2451	1967	261		2497	2295
262	2776	2427	2444		262	2480	2438		262	2748	2467	2143	262		2486	2454	262	2711	2490	2444				262		2469	2466		262	2682	2451	1967	262		2493	2295
263	2776	2427	2430		263	2480	2438		263	2748	2467	2143	263		2486	2454	263	2711	2490	2444				263		2469	2466		263	2682	2451	1967	263		2493	2295
264	2776	2427	2430		264	2480	2438		264	2748	2467	2143	264		2486	2454	264	2711	2490	2444				264		2469	2466		264	2682	2451	1967	264		2493	2295
265	2776	2427	2430		265	2480	2436		265	2748	2467	2143	265		2486	2454	265	2711	2490	2424				265		2469	2466		265	2682	2451	1967	265		2493	2285
266	2776	2427	2430		266	2480	2436		266	2748	2467	2143	266		2486	2454	266	2711	2490	2424				266		2469	2466		266	2682	2451	1967	266		2493	2285
267	2776	2427	2430		267	2480	2436		267	2748	2467	2143	267		2486	2454	267	2711	2490	2424				267		2469	2466		267	2682	2451	1967	267		2493	2285
268	2776	2427	2430		268	2480	2436		268	2748	2467	2143	268		2486	2454	268	2711	2490	2424				268		2469	2466		268	2682	2451	1967	268		2493	2285
269	2776	2427	2430		269	2480	2436		269	2748	2467	2143	269		2486	2454	269	2711	2490	2424				269		2469	2466		269	2682	2451	1967	269		2493	2285
270	2776	2427	2430		270	2480	2436		270	2748	2467	2143	270		2486	2454	270	2711	2490	2424				270		2469	2466		270	2682	2451	1967	270		2493	2285
271	2776	2427	2430		271	2480	2436		271	2748	2467	2143	271		2486	2454	271	2711	2490	2424				271		2469	2466		271	2682	2451	1967	271		2493	2285
272	2776	2427	2430		272	2480	2436		272	2748	2467	2143	272		2486	2454	272	2711	2490	2424				272		2469	2466		272	2682	2451	1967	272		2493	2285
273	2774	2427	2430		273	2480	2436		273	2748	2467	2143	273		2486	2454	273	2711	2490	2424				273		2469	2466		273	2682	2451	1967	273		2463	2285
274	2774	2427	2430		274	2480	2436		274	2748	2467	2143	274		2486	2454	274	2711	2490	2424				274		2469	2466		274	2682	2451	1967	274		2463	2285
275	2774	2427	2430		275	2480	2436		275	2748	2467	2143	275		2486	2454	275	2711	2490	2424				275		2469	2466		275	2682	2451	1967	275		2463	2285
276	2774	2427	2430		276	2480	2436		276	2748	2467	2143	276		2486	2453	276	2711	2490	2424				276		2469	2466		276	2682	2451	1967	276		2463	2285
277	2774	2427	2430		277	2480	2436		277	2748	2467	2143	277		2486	2453	277	2711	2490	2424				277		2469	2466		277	2682	2451	1967	277		2463	2285
278	2774	2427	2430		278	2480	2436		278	2748	2467	2143	278		2486	2453	278	2711	2490	2424				278		2469	2466		278	2682	2451	1967	278		2463	2285
279	2774	2427	2430		279	2480	2436		279	2748	2467	2143	279		2486	2453	279	2711	2490	2424				279		2469	2466		279	2682	2451	1967	279		2463	2285
280	2774	2427	2430		280	2480	2436		280	2748	2467	2143	280		2486	2453	280	2711	2490	2424				280		2469	2466		280	2682	2451	1967	280		2463	2285
281	2774	2427	2430		281	2480	2436		281	2748	2467	2143	281		2486	2453	281	2711	2490	2424				281		2469	2466		281	2682	2451	1967	281		2463	2285
282	2772	2427	2430		282	2480	2436		282	2748	2467	2143	282		2486	2443	282	2711	2490	2424				282		2469	2466		282	2682	2451	1967	282		2463	2285
283	2772	2427	2430		283	2480	2436		283	2748	2467	2143	283		2486	2443	283	2711	2490	2424				283		2469	2466		283	2682	2451	1967	283		2463	2285
284	2724	2427	2430		284	2480	2436		284	2748	2467	2143	284		2486	2443	284	2711	2490	2424				284		2469	2466		284	2682	2451	1967	284		2463	2285
285	2724	2427	2430		285	2480	2436		285	2748	2467	2143	285		2486	2443	285	2711	2490	2424				285		2469	2466		285	2682	2451	1967	285		2463	2285
286	2724	2427	2430		286	2480	2436		286	2748	2467	2143	286		2486	2443	286	2711	2490	2424				286		2469	2466		286	2682	2451	1967	286		2463	2285
287	2724	2427	2430		287	2480	2436		287	2748	2467	2143	287		2486	2443	287	2711	2490	2424				287		2469	2466		287	2682	2451	1967	287		2463	2285
288	2724	2427	2430		288	2480	2436		288	2748	2467	2143	288		2486	2443	288	2711	2490	2424				288		2469	2466		288	2682	2451	1967	288		2463	2285
289	2724	2427	2430		289	2480	2436		289	2748	2467	2143	289		2486	2443	289	2711	2490	2424				289		2469	2466		289	2682	2451	1967	289		2463	2285
290	2724	2427	2430		290	2480	2436		290	2748	2467	2143	290		2486	2443	290	2694	2490	2424				290		2469	2466		290	2682	2451	1967	290		2463	2285
291	2724	2427	2430		291	2480	2436		291	2748	2467	2143	291		2486	2443	291	2694	2490	2424				291		2469	2466		291	2682	2451	1967	291		2463	2285
292	2724	2427	2430		292	2480	2436		292	2748	2467	2143	292		2486	2443	292	2694	2490	2424				292		2469	2466		292	2682	2451	1967	292		2463	2285
293	2724	2427	2430		293	2480	2436		293	2748	2467	2143	293		2486	2443	293	2694	2490	2424				293		2469	2466		293	2682	2451	1967	293		2463	2268
294	2724	2427	2430		294	2480	2436		294	2748	2467	2143	294		2486	2443	294	2694	2490	2424				294		2469	2466		294	2682	2451	1967	294		2463	2268
295	2724	2427	2430		295	2480	2436		295	2748	2467	2143	295		2486	2443	295	2694	2490	2424				295		2469	2466		295	2682	2451	1967	295		2463	2268
296	2724	2427	2430		296	2397	2436		296	2748	2467	2143	296		2486	2443	296	2694	2490	2424				296		2469	2466		296	2682	2451	1967	296		2463	2268
297	2724	2427	2430		297	2397	2436		297	2748	2467	2143	297		2485	2443	297	2694	2490	2424				297		2469	2466		297	2682	2451	1967	297		2463	2268
298	2724	2427	2430		298	2397	2436		298	2748	2467	2143	298		2485	2443	298	2694	2490	2424				298		2469	2466		298	2682	2451	1967	298		2463	2268
299	2724	2427	2430		299	2397	2436		299	2748	2467	2143	299		2485	2443	299	2694	2490	2424				299		2469	2466		299	2682	2451	1967	299		2463	2268
300	2724	2427	2430		300	2397	2436		300	2748	2467	2138	300		2485	2443	300	2694	2490	2424				300		2469	2466		300	2682	2451	1967	300		2463	2268
301	2724	2427	2430		301	2397	2436		301	2748	2467	2138	301		2485	2443	301	2694	2490	2424				301		2469	2466		301	2682	2451	1967	301		2463	2268
302	2724	2427	2430		302	2397	2436		302	2748	2467	2138	302		2485	2443	302	2694	2490	2424				302		2469	2466		302	2682	2451	1967	302		2463	2256
303	2724	2427	2430		303	2397	2436		303	2748	2467	2138	303		2485	2443	303	2694	2490	2400				303		2469	2466		303	2682	2451	1967	303		2456	2256
304	2724	2427	2430		304	2397	2436		304	2748	2467	2138	304		2485	2443	304	2694	2490	2400				304		2469	2466		304	2682	2451	1967	304		2456	2256
305	2724	2427	2430		305	2397	2436		305	2748	2467	2138	305		2485	2443	305	2694	2490	2400				305		2469	2466		305	2682	2451	1967	305		2456	2256
306	2724	2427	2430		306	2397	2436		306	2748	2467	2138	306		2485	2443	306	2694	2490	2400				306		2469	2466		306	2682	2451	1967	306		2456	2256
307	2724	2427	2430		307	2397	2436		307	2748	2467	2138	307		2485	2443	307	2694	2490	2400				307		2469	2466		307	2682	2451	1967	307		2456	2256
308	2724	2427	2430		308	2397	2436		308	2748	2467	2138	308		2485	2443	308	2694	2490	2400				308		2469	2466		308	2682	2451	1967	308		2456	2256
309	2724	2427	2430		309	2397	2436		309	2748	2467	2138	309		2485	2443	309	2694	2490	2400				309		2469	2466		309	2682	2451	1967	309		2456	2256
310	2724	2427	2430		310	2397	2436		310	2748	2467	2138	310		2485	2443	310	2694	2490	2400				310		2469	2466		310	2682	2451	1967	310		2456	2256
311	2724	2427	2430		311	2397	2432		311	2748	2467	2138	311		2485	2443	311	2694	2490	2400				311		2469	2466		311	2682	2451	1967	311		2456	2256
312	2724	2427	2430		312	2397	2432		312	2748	2467	2138	312		2485	2443	312	2694	2490	2400				312		2469	2465		312	2682	2451	1967	312		2456	2256
313	2724	2427	2430		313	2397	2432		313	2748	2467	2138	313		2485	2443	313	2694	2490	2399				313		2469	2465		313	2682	2451	1967	313		2456	2256
314	2724	2427	2430		314	2397	2432		314	2748	2467	2138	314		2485	2443	314	2694	2490	2399				314		2469	2465		314	2682	2451	1967	314		2456	2256
315	2724	2427	2430		315	2397	2432		315	2748	2467	2138	315		2485	2442	315	2694	2490	2399				315		2469	2465		315	2682	2451	1967	315		2456	2256
316	2724	2427	2427		316	2397	2432		316	2748	2467	2126	316		2485	2442	316	2694	2490	2399				316		2469	2465		316	2682	2451	1967	316		2456	2256
317	2724	2427	2427		317	2397	2432		317	2748	2467	2126	317		2485	2442	317	2694	2490	2399				317		2469	2465		317	2682	2451	1967	317		2456	2256
318	2724	2427	2427		318	2397	2432		318	2748	2467	2126	318		2485	2442	318	2694	2490	2399				318		2469	2465		318	2682	2451	1967	318		2456	2256
319	2724	2427	2427		319	2397	2432		319	2748	2467	2126	319		2485	2442	319	2694	2490	2399				319		2469	2465		319	2682	2451	1967	319		2456	2256
320	2724	2427	2427		320	2397	2432		320	2748	2467	2126	320		2485	2442	320	2694	2490	2399				320		2469	2465		320	2682	2433	1967	320		2456	2256
321	2724	2427	2427		321	2397	2432		321	2748	2467	2126	321		2485	2442	321	2694	2490	2399				321		2469	2465		321	2682	2433	1967	321		2456	2256
322	2724	2427	2427		322	2397	2432		322	2748	2467	2126	322		2485	2442	322	2694	2490	2399				322		2469	2465		322	2682	2433	1967	322		2456	2256
323	2724	2427	2427		323	2397	2432		323	2748	2467	2126	323		2485	2442	323	2694	2490	2399				323		2469	2465		323	2682	2433	1967	323		2456	2256
324	2724	2427	2427		324	2397	2432		324	2748	2467	2126	324		2485	2442	324	2694	2490	2399				324		2469	2465		324	2682	2433	1967	324		2456	2256
325	2724	2427	2427		325	2397	2427		325	2748	2467	2126	325		2485	2442	325	2694	2490	2399				325		2450	2465		325	2682	2433	1967	325		2456	2256
326	2724	2427	2427		326	2397	2427		326	2748	2467	2126	326		2485	2442	326	2694	2490	2399				326		2450	2465		326	2682	2433	1967	326		2456	2256
327	2724	2427	2427		327	2397	2427		327	2748	2467	2126	327		2485	2442	327	2694	2490	2399				327		2450	2465		327	2682	2433	1967	327		2456	2256
328	2724	2427	2427		328	2397	2427		328	2748	2467	2126	328		2485	2442	328	2694	2490	2399				328		2450	2465		328	2682	2433	1967	328		2456	2256
329	2724	2427	2427		329	2397	2427		329	2748	2467	2126	329		2485	2442	329	2694	2490	2399				329		2450	2465		329	2682	2433	1967	329		2456	2256
330	2724	2427	2427		330	2397	2427		330	2748	2467	2123	330		2485	2442	330	2694	2490	2399				330		2450	2465		330	2682	2433	1967	330		2456	2256
331	2724	2427	2420		331	2397	2418		331	2748	2467	2123	331		2485	2442	331	2694	2490	2399				331		2450	2465		331	2682	2433	1967	331		2456	2256
332	2724	2427	2420		332	2397	2418		332	2748	2467	2123	332		2485	2441	332	2694	2490	2399				332		2450	2461		332	2682	2433	1967	332		2456	2256
333	2724	2427	2420		333	2397	2418		333	2748	2467	2123	333		2485	2441	333	2694	2490	2399				333		2450	2461		333	2682	2433	1951	333		2456	2256
334	2724	2427	2420		334	2397	2418		334	2748	2467	2123	334		2485	2441	334	2694	2490	2399				334		2450	2461		334	2682	2433	1951	334		2456	2256
335	2724	2427	2420		335	2397	2418		335	2748	2467	2114	335		2485	2441	335	2694	2490	2399				335		2450	2461		335	2682	2433	1951	335		2456	2256
336	2724	2427	2420		336	2397	2418		336	2748	2467	2114	336		2485	2441	336	2694	2490	2399				336		2450	2461		336	2682	2433	1951	336		2456	2256
337	2724	2427	2420		337	2397	2418		337	2748	2467	2114	337		2485	2441	337	2694	2469	2399				337		2450	2461		337	2682	2433	1951	337		2456	2256
338	2724	2427	2420		338	2397	2418		338	2748	2467	2114	338		2485	2437	338	2694	2469	2399				338		2450	2461		338	2682	2433	1951	338		2456	2256
339	2724	2427	2420		339	2397	2418		339	2748	2467	2114	339		2485	2437	339	2694	2469	2399				339		2450	2461		339	2682	2433	1951	339		2456	2256
340	2724	2427	2420		340	2397	2418		340	2748	2467	2114	340		2485	2437	340	2694	2469	2387				340		2450	2456		340	2682	2433	1951	340		2456	2256
341	2724	2427	2420		341	2397	2418		341	2748	2467	2114	341		2485	2431	341	2694	2469	2387				341		2450	2456		341	2682	2433	1951	341		2456	2256
342	2724	2427	2420		342	2397	2418		342	2748	2467	2114	342		2485	2431	342	2694	2469	2387				342		2450	2456		342	2682	2433	1951	342		2456	2256
343	2724	2427	2420		343	2397	2418		343	2748	2467	2114	343		2485	2431	343	2694	2469	2387				343		2450	2455		343	2682	2433	1951	343		2456	2256
344	2724	2427	2420		344	2397	2418		344	2748	2467	2114	344		2485	2431	344	2694	2469	2387				344		2450	2455		344	2682	2433	1951	344		2456	2256
345	2724	2427	2420		345	2397	2418		345	2748	2467	2114	345		2485	2431	345	2694	2469	2387				345		2450	2455		345	2682	2433	1951	345		2456	2256
346	2724	2427	2420		346	2397	2418		346	2748	2467	2114	346		2485	2431	346	2694	2469	2384				346		2450	2455		346	2682	2433	1949	346		2456	2256
347	2724	2427	2420		347	2397	2418		347	2748	2467	2114	347		2465	2431	347	2694	2469	2384				347		2450	2455		347	2682	2433	1949	347		2456	2256
348	2724	2427	2420		348	2397	2418		348	2748	2467	2114	348		2465	2431	348	2694	2469	2384				348		2450	2455		348	2682	2433	1949	348		2456	2256
349	2724	2427	2420		349	2397	2418		349	2748	2467	2114	349		2465	2431	349	2694	2469	2384				349		2450	2455		349	2682	2433	1949	349		2456	2256
350	2724	2427	2420		350	2397	2418		350	2748	2467	2108	350		2465	2431	350	2694	2469	2384				350		2450	2455		350	2682	2433	1936	350		2456	2256
351	2724	2427	2420		351	2397	2418		351	2748	2467	2108	351		2465	2431	351	2694	2469	2375				351		2450	2455		351	2682	2433	1936	351		2456	2256
352	2724	2427	2420		352	2397	2418		352	2748	2467	2108	352		2465	2431	352	2694	2469	2375				352		2450	2450		352	2682	2433	1936	352		2456	2256
353	2724	2427	2420		353	2397	2418		353	2748	2467	2108	353		2465	2431	353	2694	2469	2375				353		2450	2450		353	2682	2433	1936	353		2456	2256
354	2724	2427	2420		354	2397	2418		354	2748	2467	2108	354		2465	2431	354	2694	2469	2375				354		2450	2450		354	2682	2433	1936	354		2456	2256
355	2724	2427	2420		355	2397	2418		355	2748	2467	2108	355		2465	2431	355	2694	2469	2375				355		2450	2450		355	2682	2433	1936	355		2456	2256
356	2724	2427	2420		356	2397	2418		356	2748	2467	2108	356		2465	2431	356	2694	2469	2375				356		2450	2450		356	2682	2433	1931	356		2456	2256
357	2724	2427	2420		357	2397	2418		357	2748	2467	2108	357		2465	2431	357	2694	2469	2375				357		2450	2450		357	2682	2433	1931	357		2456	2256
358	2724	2427	2420		358	2397	2416		358	2748	2467	2108	358		2465	2431	358	2694	2469	2375				358		2450	2450		358	2682	2433	1931	358		2456	2256
359	2724	2427	2420		359	2397	2416		359	2748	2467	2108	359		2465	2431	359	2694	2469	2375				359		2450	2450		359	2682	2433	1931	359		2456	2256
360	2724	2427	2414		360	2397	2416		360	2748	2467	2108	360		2465	2431	360	2694	2469	2375				360		2450	2450		360	2682	2433	1931	360		2456	2256
361	2724	2427	2414		361	2397	2416		361	2748	2467	2108	361		2465	2431	361	2694	2469	2375				361		2450	2450		361	2682	2433	1931	361		2456	2256
362	2724	2427	2414		362	2397	2416		362	2748	2467	2108	362		2465	2431	362	2694	2469	2375				362		2450	2450		362	2682	2433	1931	362		2456	2255
363	2724	2427	2414		363	2397	2416		363	2748	2467	2108	363		2465	2427	363	2694	2469	2375				363		2450	2450		363	2682	2433	1931	363		2456	2255
364	2724	2427	2414		364	2397	2416		364	2748	2467	2108	364		2465	2427	364	2694	2469	2375				364		2450	2450		364	2682	2433	1931	364		2456	2255
365	2724	2427	2414		365	2397	2416		365	2748	2467	2108	365		2465	2427	365	2694	2469	2375				365		2450	2450		365	2682	2433	1931	365		2456	2255
366	2724	2427	2414		366	2397	2416		366	2748	2467	2108	366		2465	2427	366	2694	2469	2375				366		2450	2450		366	2682	2433	1926	366		2456	2255
367	2724	2427	2414		367	2397	2416		367	2748	2467	2108	367		2465	2427	367	2694	2469	2369				367		2450	2450		367	2682	2433	1926	367		2456	2255
368	2724	2427	2407		368	2397	2408		368	2748	2467	2108	368		2465	2427	368	2694	2469	2369				368		2450	2450		368	2682	2433	1926	368		2456	2255
369	2724	2427	2407		369	2397	2408		369	2748	2467	2108	369		2465	2427	369	2694	2469	2369				369		2450	2450		369	2682	2433	1926	369		2456	2255
370	2724	2427	2407		370	2397	2408		370	2748	2467	2108	370		2465	2427	370	2694	2469	2369				370		2450	2450		370	2682	2433	1926	370		2456	2248
371	2724	2427	2407		371	2397	2408		371	2748	2467	2108	371		2465	2427	371	2694	2469	2369				371		2450	2450		371	2682	2433	1926	371		2456	2248
372	2724	2427	2407		372	2397	2408		372	2748	2467	2108	372		2465	2427	372	2694	2469	2349				372		2450	2450		372	2682	2433	1900	372		2456	2248
373	2724	2427	2407		373	2397	2408		373	2748	2467	2108	373		2465	2427	373	2694	2469	2349				373		2450	2450		373	2682	2433	1900	373		2456	2241
374	2724	2427	2407		374	2397	2408		374	2748	2467	2108	374		2465	2427	374	2694	2469	2349				374		2450	2450		374	2682	2433	1900	374		2456	2241
375	2724	2427	2407		375	2397	2408		375	2748	2467	2108	375		2465	2427	375	2694	2469	2349				375		2450	2450		375	2682	2433	1900	375		2456	2241
376	2724	2427	2407		376	2397	2408		376	2748	2467	2108	376		2465	2427	376	2694	2469	2349				376		2450	2450		376	2682	2433	1900	376		2456	2241
377	2724	2427	2407		377	2397	2408		377	2748	2467	2101	377		2465	2426	377	2694	2469	2349				377		2450	2450		377	2682	2433	1900	377		2456	2241
378	2724	2427	2407		378	2397	2408		378	2748	2467	2101	378		2465	2426	378	2694	2469	2349				378		2450	2450		378	2682	2433	1900	378		2447	2219
379	2724	2427	2407		379	2397	2408		379	2748	2467	2101	379		2465	2426	379	2694	2469	2349				379		2450	2450		379	2682	2433	1900	379		2447	2219
380	2724	2427	2407		380	2397	2408		380	2748	2467	2101	380		2465	2426	380	2694	2469	2349				380		2450	2450		380	2682	2433	1900	380		2444	2219
381	2724	2427	2407		381	2397	2408		381	2748	2467	2101	381		2465	2426	381	2694	2469	2349				381		2450	2450		381	2682	2433	1900	381		2444	2219
382	2724	2427	2407		382	2397	2408		382	2748	2467	2101	382		2465	2426	382	2694	2469	2349				382		2450	2450		382	2682	2433	1900	382		2444	2219
383	2724	2427	2407		383	2397	2408		383	2748	2467	2091	383		2465	2426	383	2694	2469	2349				383		2450	2450		383	2682	2433	1900	383		2444	2219
384	2724	2427	2407		384	2397	2408		384	2748	2467	2091	384		2465	2426	384	2694	2469	1869				384		2450	2450		384	2682	2433	1900	384		2444	2219
385	2724	2427	2407		385	2397	2408		385	2748	2467	2091	385		2465	2426	385	2694	2469	1869				385		2450	2450		385	2682	2433	1900	385		2444	2219
386	2724	2427	2407		386	2397	2408		386	2748	2467	2091	386		2465	2426	386	2694	2469	1869				386		2450	2450		386	2682	2433	1900	386		2444	2219
387	2724	2427	2407		387	2397	2408		387	2748	2467	2091	387		2465	2426	387	2681	2469	1869				387		2450	2450		387	2682	2433	1900	387		2444	2219
388	2724	2427	2407		388	2397	2408		388	2748	2467	2091	388		2465	2426	388	2681	2469	1869				388		2450	2450		388	2682	2433	1900	388		2444	2219
389	2724	2427	2407		389	2397	2408		389	2748	2467	2091	389		2465	2426	389	2681	2469	1869				389		2444	2450		389	2682	2433	1900	389		2444	2219
390	2724	2427	2407		390	2397	2403		390	2731	2467	2091	390		2465	2426	390	2681	2469	1869				390		2444	2450		390	2682	2433	1900	390		2444	2219
391	2724	2427	2407		391	2397	2403		391	2731	2467	2091	391		2465	2426	391	2681	2469	1869				391		2444	2439		391	2682	2433	1900	391		2444	2219
392	2724	2427	2407		392	2397	2403		392	2731	2467	2091	392		2465	2426	392	2681	2469	1869				392		2444	2439		392	2682	2433	1900	392		2444	2219
393	2724	2427	2407		393	2397	2403		393	2731	2467	2091	393		2465	2426	393	2681	2469	1869				393		2444	2439		393	2682	2433	1900	393		2444	2219
394	2724	2427	2407		394	2397	2403		394	2723	2467	2091	394		2465	2426	394	2681	2469	1869				394		2444	2439		394	2682	2433	1895	394		2444	2219
395	2724	2427	2407		395	2397	2403		395	2723	2467	2091	395		2465	2426	395	2681	2469	1869				395		2444	2439		395	2682	2433	1895	395		2444	2219
396	2724	2427	2407		396	2397	2403		396	2723	2467	2091	396		2465	2426	396	2681	2469	1869				396		2444	2439		396	2682	2433	1895	396		2444	2219
397	2724	2427	2407		397	2397	2403		397	2723	2467	2091	397		2465	2426	397	2681	2469	1869				397		2444	2439		397	2682	2427	1895	397		2444	2219
398	2724	2427	2407		398	2397	2403		398	2723	2467	2091	398		2465	2426	398	2681	2469	1869				398		2444	2439		398	2682	2427	1895	398		2444	2219
399	2724	2427	2407		399	2397	2403		399	2723	2467	2091	399		2465	2426	399	2681	2469	1869				399		2444	2439		399	2682	2427	1895	399		2444	2219
400	2724	2427	2407		400	2397	2403		400	2723	2467	2091	400		2465	2426	400	2681	2469	1863				400		2444	2439		400	2682	2427	1895	400		2444	2219
401	2724	2427	2407		401	2397	2403		401	2723	2467	2091	401		2465	2426	401	2681	2469	1863				401		2444	2439		401	2682	2427	1895	401		2444	2219
402	2724	2427	2407		402	2397	2398		402	2723	2467	2091	402		2465	2426	402	2681	2469	1863				402		2444	2439		402	2682	2427	1895	402		2444	2219
403	2724	2427	2404		403	2397	2398		403	2723	2467	2091	403		2465	2426	403	2681	2469	1863				403		2444	2439		403	2682	2427	1895	403		2444	2219
404	2724	2427	2404		404	2397	2398		404	2723	2467	2091	404		2465	2426	404	2681	2469	1863				404		2444	2439		404	2682	2427	1895	404		2444	2219
405	2724	2427	2404		405	2397	2398		405	2723	2467	2091	405		2465	2426	405	2681	2469	1863				405		2444	2428		405	2682	2427	1895	405		2444	2219
406	2724	2427	2404		406	2397	2398		406	2723	2467	2079	406		2465	2426	406	2681	2469	1863				406		2444	2428		406	2682	2427	1895	406		2444	2219
407	2724	2427	2404		407	2397	2398		407	2723	2467	2079	407		2465	2426	407	2681	2469	1863				407		2444	2428		407	2682	2427	1760	407		2444	2219
408	2724	2427	2404		408	2397	2398		408	2723	2467	2079	408		2465	2414	408	2681	2469	1863				408		2444	2428		408	2682	2427	1760	408		2444	2219
409	2724	2427	2404		409	2397	2398		409	2723	2467	2079	409		2465	2414	409	2681	2469	1863				409		2444	2428		409	2682	2427	1760	409		2444	2219
410	2724	2427	2404		410	2397	2398		410	2723	2467	2079	410		2465	2414	410	2681	2468	1863				410		2444	2428		410	2682	2427	1760	410		2444	2219
411	2724	2427	2404		411	2397	2398		411	2723	2467	2079	411		2465	2414	411	2681	2468	1863				411		2444	2428		411	2682	2427	1760	411		2444	2219
412	2724	2427	2404		412	2397	2398		412	2723	2467	2079	412		2465	2414	412	2681	2468	1863				412		2444	2428		412	2682	2427	1760	412		2436	2219
413	2724	2427	2404		413	2397	2398		413	2723	2467	2079	413		2465	2414	413	2681	2468	1863				413		2444	2428		413	2682	2427	1760	413		2436	2219
414	2724	2427	2404		414	2397	2398		414	2723	2467	2079	414		2465	2414	414	2681	2468	1863				414		2444	2428		414	2682	2427	1760	414		2436	2219
415	2724	2427	2404		415	2397	2398		415	2723	2467	2079	415		2465	2414	415	2681	2468	1863				415		2444	2428		415	2682	2427	1760	415		2436	2219
416	2724	2427	2404		416	2397	2398		416	2723	2467	2079	416		2465	2414	416	2681	2468	1863				416		2444	2428		416	2682	2427	1760	416		2436	2219
417	2724	2427	2404		417	2397	2398		417	2723	2467	2079	417		2465	2414	417	2681	2468	1863				417		2444	2428		417	2682	2427	1760	417		2436	2219
418	2724	2427	2399		418	2397	2398		418	2723	2467	2079	418		2465	2414	418	2681	2468	1848				418		2444	2428		418	2682	2427	1760	418		2436	2219
419	2724	2427	2399		419	2397	2398		419	2723	2467	2079	419		2465	2414	419	2681	2468	1848				419		2444	2428		419	2682	2427	1760	419		2436	2219
420	2724	2427	2399		420	2397	2398		420	2723	2467	2079	420		2465	2414	420	2681	2468	1848				420		2444	2417		420	2682	2427	1760	420		2436	2219
421	2724	2427	2399		421	2397	2389		421	2723	2467	2079	421		2465	2414	421	2681	2468	1848				421		2444	2417		421	2682	2427	1760	421		2436	2201
422	2724	2427	2399		422	2397	2389		422	2723	2467	2079	422		2465	2414	422	2681	2468	1848				422		2444	2417		422	2682	2427	1760	422		2436	2201
423	2724	2427	2399		423	2397	2389		423	2723	2467	2079	423		2465	2414	423	2681	2468	1848				423		2444	2417		423	2682	2427	1760	423		2436	2201
424	2724	2427	2399		424	2397	2389		424	2723	2467	2079	424		2465	2414	424	2681	2468	1848				424		2444	2417		424	2682	2427	1760	424		2436	2201
425	2724	2427	2399		425	2397	2389		425	2723	2467	2079	425		2465	2414	425	2681	2468	1848				425		2444	2417		425	2682	2427	1760	425		2436	2201
426	2724	2427	2399		426	2397	2389		426	2723	2467	2079	426		2465	2414	426	2681	2468	1848				426		2444	2417		426	2682	2427	1760	426		2436	2201
427	2724	2427	2399		427	2397	2386		427	2723	2467	2066	427		2465	2414	427	2681	2468	1848				427		2444	2417		427	2682	2427	1760	427		2436	2201
428	2724	2427	2399		428	2397	2386		428	2723	2467	2066	428		2465	2414	428	2681	2468	1842				428		2444	2417		428	2682	2427	1760	428		2436	2201
429	2724	2427	2399		429	2397	2386		429	2723	2467	2066	429		2465	2414	429	2681	2464	1842				429		2444	2417		429	2682	2427	1760	429		2436	2201
430	2724	2427	2399		430	2397	2386		430	2723	2467	2066	430		2465	2414	430	2681	2464	1842				430		2444	2417		430	2682	2427	1760	430		2436	2201
431	2724	2427	2399		431	2397	2386		431	2723	2467	2066	431		2465	2414	431	2681	2464	1842				431		2444	2417		431	2682	2427	1760	431		2436	2201
432	2724	2427	2399		432	2397	2380		432	2723	2467	2066	432		2465	2414	432	2681	2464	1842				432		2444	2417		432	2682	2427	1760	432		2436	2201
433	2724	2427	2399		433	2397	2380		433	2723	2467	2066	433		2465	2414	433	2681	2464	1842				433		2444	2417		433	2682	2427	1760	433		2436	2201
434	2724	2427	2399		434	2397	2380		434	2723	2467	2066	434		2465	2414	434	2681	2464	1842				434		2444	2417		434	2682	2427	1760	434		2436	2201
435	2724	2427	2399		435	2397	2380		435	2723	2467	2066	435		2465	2414	435	2681	2464	1842				435		2444	2417		435	2682	2427	1735	435		2436	2201
436	2724	2427	2399		436	2397	2380		436	2723	2467	2066	436		2465	2414	436	2681	2464	1835				436		2444	2417		436	2682	2427	1735	436		2436	2201
437	2724	2427	2399		437	2397	2380		437	2723	2467	2066	437		2465	2414	437	2681	2464	1835				437		2444	2417		437	2682	2427	1735	437		2436	2201
438	2724	2427	2399		438	2397	2380		438	2723	2467	2066	438		2465	2414	438	2681	2464	1835				438		2444	2417		438	2682	2427	1735	438		2436	2201
439	2724	2427	2399		439	2397	2380		439	2723	2467	2066	439		2465	2414	439	2681	2464	1835				439		2444	2417		439	2682	2427	1735	439		2436	2201
440	2724	2427	2399		440	2397	2380		440	2723	2467	2066	440		2465	2414	440	2681	2454	1835				440		2444	2417		440	2682	2427	1735	440		2436	2201
441	2724	2427	2399		441	2397	2380		441	2723	2467	2066	441		2442	2414	441	2681	2454	1835				441		2444	2417		441	2682	2427	1735	441		2436	2201
442	2724	2427	2399		442	2397	2380		442	2723	2467	2066	442		2442	2414	442	2681	2454	1835				442		2444	2417		442	2682	2427	1735	442		2436	2201
443	2724	2427	2399		443	2397	2380		443	2723	2467	2066	443		2442	2414	443	2681	2454	1835				443		2444	2417		443	2682	2427	1735	443		2436	2201
444	2724	2427	2399		444	2397	2380		444	2723	2467	2066	444		2442	2414	444	2681	2454	1835				444		2444	2417		444	2682	2405	1735	444		2436	2201
445	2724	2427	2399		445	2397	2380		445	2723	2467	2066	445		2442	2414	445	2681	2454	1835				445		2444	2417		445	2682	2405	1735	445		2436	2201
446	2724	2427	2399		446	2397	2380		446	2723	2467	2066	446		2442	2414	446	2681	2454	1835				446		2444	2417		446	2682	2405	1735	446		2436	2201
447	2724	2427	2399		447	2397	2380		447	2723	2467	2066	447		2442	2414	447	2681	2454	1835				447		2444	2417		447	2682	2405	1735	447		2436	2201
448	2724	2427	2399		448	2397	2380		448	2723	2467	2066	448		2442	2414	448	2681	2454	1835				448		2444	2417		448	2682	2405	1735	448		2436	2201
449	2724	2427	2399		449	2397	2380		449	2723	2467	2066	449		2442	2414	449	2681	2454	1835				449		2444	2417		449	2682	2405	1730	449		2436	2201
450	2724	2427	2399		450	2397	2380		450	2723	2467	2066	450		2442	2414	450	2681	2454	1835				450		2444	2417		450	2682	2405	1730	450		2436	2201
451	2724	2427	2399		451	2397	2380		451	2723	2467	2066	451		2442	2414	451	2681	2454	1835				451		2444	2417		451	2682	2405	1730	451		2436	2201
452	2724	2427	2399		452	2397	2380		452	2723	2467	2066	452		2442	2414	452	2681	2454	1835				452		2444	2417		452	2682	2405	1730	452		2436	2201
453	2724	2427	2399		453	2397	2380		453	2723	2467	2066	453		2442	2410	453	2681	2454	1835				453		2444	2417		453	2682	2405	1730	453		2436	2201
454	2724	2427	2399		454	2397	2380		454	2723	2467	2066	454		2442	2410	454	2681	2454	1835				454		2444	2417		454	2682	2405	1730	454		2436	2201
455	2724	2427	2399		455	2397	2380		455	2723	2467	2066	455		2442	2410	455	2681	2454	1835				455		2444	2417		455	2682	2405	1730	455		2436	2201
456	2724	2427	2399		456	2397	2380		456	2723	2467	2066	456		2442	2410	456	2681	2454	1835				456		2444	2417		456	2682	2405	1730	456		2436	2201
457	2724	2427	2399		457	2397	2380		457	2723	2467	2066	457		2442	2410	457	2681	2454	1835				457		2444	2417		457	2682	2405	1730	457		2436	2201
458	2724	2427	2399		458	2397	2374		458	2723	2467	2066	458		2442	2410	458	2681	2454	1835				458		2444	2417		458	2682	2405	1730	458		2436	2201
459	2724	2427	2399		459	2397	2374		459	2723	2467	2066	459		2442	2410	459	2681	2454	1835				459		2444	2417		459	2682	2405	1730	459		2436	2201
460	2724	2427	2399		460	2397	2374		460	2723	2467	2066	460		2442	2410	460	2681	2454	1835				460		2444	2417		460	2682	2405	1730	460		2436	2201
461	2724	2427	2399		461	2397	2374		461	2723	2467	2066	461		2442	2410	461	2681	2454	1835				461		2444	2417		461	2682	2405	1730	461		2436	2201
462	2724	2427	2399		462	2397	2374		462	2723	2467	2066	462		2442	2410	462	2681	2454	1835				462		2444	2412		462	2682	2405	1730	462		2436	2196
463	2724	2427	2399		463	2397	2374		463	2723	2467	2066	463		2442	2410	463	2681	2454	1835				463		2444	2412		463	2682	2405	1730	463		2436	2196
464	2724	2427	2399		464	2397	2374		464	2723	2467	2066	464		2442	2410	464	2681	2454	1835				464		2444	2412		464	2682	2405	1730	464		2436	2196
465	2707	2427	2399		465	2397	2374		465	2723	2467	2066	465		2442	2410	465	2681	2454	1833				465		2444	2412		465	2682	2400	1730	465		2436	2196
466	2707	2427	2397		466	2397	2374		466	2702	2467	2063	466		2442	2410	466	2681	2454	1833				466		2444	2412		466	2682	2385	1730	466		2436	2196
467	2707	2427	2397		467	2397	2374		467	2702	2467	2063	467		2442	2410	467	2681	2454	1833				467		2444	2412		467	2682	2385	1730	467		2436	2196
468	2707	2427	2396		468	2397	2374		468	2702	2467	2063	468		2442	2410	468	2681	2454	1833				468		2444	2412		468	2682	2385	1730	468		2436	2196
469	2707	2427	2396		469	2397	2374		469	2702	2467	2063	469		2442	2410	469	2681	2454	1833				469		2444	2412		469	2682	2385	1730	469		2436	2196
470	2707	2427	2396		470	2397	2374		470	2702	2467	2063	470		2442	2410	470	2681	2454	1833				470		2444	2412		470	2682	2385	1725	470		2436	2196
471	2707	2427	2396		471	2397	2372		471	2702	2467	2063	471		2442	2403	471	2681	2454	1833				471		2444	2412		471	2682	2385	1725	471		2436	2196
472	2707	2427	2396		472	2397	2372		472	2702	2467	2059	472		2442	2403	472	2681	2454	1833				472		2444	2412		472	2682	2385	1725	472		2436	2196
473	2707	2427	2396		473	2397	2372		473	2702	2467	2059	473		2442	2403	473	2681	2454	1811				473		2444	2412		473	2682	2385	1725	473		2436	2196
474	2707	2427	2396		474	2397	2372		474	2702	2467	2059	474		2442	2403	474	2681	2454	1811				474		2444	2412		474	2682	2385	1725	474		2436	2196
475	2707	2427	2396		475	2397	2364		475	2702	2467	2059	475		2442	2403	475	2681	2454	1805				475		2444	2412		475	2682	2385	1624	475		2436	2196
476	2707	2427	2396		476	2397	2364		476	2702	2467	2059	476		2442	2403	476	2681	2454	1805				476		2444	2412		476	2682	2385	1624	476		2436	2196
477	2707	2427	2396		477	2397	2364		477	2702	2467	2059	477		2442	2403	477	2681	2454	1805				477		2444	2412		477	2682	2385	1624	477		2436	2196
478	2707	2427	2396		478	2397	2364		478	2702	2467	2059	478		2442	2403	478	2681	2454	1805				478		2444	2412		478	2682	2385	1624	478		2436	2196
479	2707	2427	2396		479	2397	2364		479	2702	2467	2059	479		2442	2403	479	2681	2454	1805				479		2444	2412		479	2682	2385	1624	479		2436	2196
480	2707	2427	2395		480	2397	2364		480	2702	2467	2054	480		2442	2403	480	2681	2454	1805				480		2444	2412		480	2682	2385	1624	480		2436	2196
481	2707	2427	2395		481	2397	2364		481	2702	2467	2054	481		2442	2403	481	2681	2454	1805				481		2444	2412		481	2682	2385	1624	481		2436	2196
482	2707	2427	2395		482	2397	2364		482	2702	2467	2054	482		2442	2403	482	2681	2454	1805				482		2444	2412		482	2682	2385	1624	482		2436	2196
483	2707	2427	2395		483	2397	2364		483	2702	2467	2054	483		2442	2403	483	2681	2454	1805				483		2444	2412		483	2682	2385	1624	483		2436	2196
484	2707	2404	2395		484	2397	2364		484	2702	2467	2054	484		2442	2403	484	2681	2454	1805				484		2444	2412		484	2682	2385	1624	484		2436	2196
485	2707	2404	2395		485	2397	2364		485	2702	2467	2054	485		2442	2403	485	2681	2454	1805				485		2444	2412		485	2682	2385	1624	485		2436	2196
486	2707	2404	2395		486	2397	2364		486	2702	2467	2054	486		2442	2403	486	2681	2454	1805				486		2444	2412		486	2682	2385	1624	486		2436	2196
487	2707	2404	2395		487	2397	2364		487	2702	2467	2052	487		2442	2403	487	2681	2454	1805				487		2444	2412		487	2682	2385	1616	487		2436	2196
488	2707	2404	2395		488	2397	2364		488	2702	2467	2052	488		2442	2403	488	2681	2454	1805				488		2444	2412		488	2682	2385	1616	488		2436	2196
489	2707	2404	2395		489	2397	2364		489	2702	2467	2052	489		2442	2403	489	2681	2427	1805				489		2444	2412		489	2682	2385	1616	489		2436	2196
490	2707	2404	2395		490	2397	2364		490	2702	2467	2052	490		2442	2403	490	2681	2427	1805				490		2444	2412		490	2682	2385	1616	490		2436	2196
491	2707	2404	2394		491	2397	2364		491	2702	2467	2047	491		2442	2403	491	2681	2427	1805				491		2444	2412		491	2682	2385	1616	491		2436	2196
492	2707	2404	2394		492	2397	2364		492	2702	2467	2047	492		2442	2403	492	2681	2427	1805				492		2444	2412		492	2682	2385	1616	492		2436	2196
493	2707	2404	2392		493	2397	2364		493	2702	2467	2047	493		2442	2403	493	2681	2427	1805				493		2444	2412		493	2682	2385	1616	493		2436	2196
494	2707	2404	2392		494	2397	2364		494	2702	2467	2047	494		2442	2403	494	2681	2427	1805				494		2444	2412		494	2682	2385	1616	494		2436	2196
495	2707	2404	2392		495	2397	2364		495	2702	2467	2047	495		2442	2397	495	2681	2427	1805				495		2444	2408		495	2682	2385	1616	495		2436	2196
496	2707	2404	2392		496	2397	2364		496	2702	2467	2047	496		2442	2397	496	2681	2427	1805				496		2444	2408		496	2682	2385	1616	496		2436	2196
497	2707	2404	2392		497	2397	2364		497	2702	2467	2047	497		2442	2397	497	2681	2427	1805				497		2444	2406		497	2682	2385	1616	497		2436	2196
498	2707	2404	2392		498	2397	2364		498	2702	2467	2047	498		2442	2397	498	2681	2427	1805				498		2444	2406		498	2682	2385	1616	498		2436	2196
499	2707	2404	2392		499	2397	2364		499	2702	2467	2047	499		2442	2397	499	2681	2427	1805				499		2444	2406		499	2682	2385	1616	499		2436	2196
500	2707	2404	2392		500	2397	2364		500	2702	2467	2047	500		2442	2397	500	2681	2427	1805				500		2444	2406		500	2682	2385	1616	500		2436	2196
501	2707	2404	2392		501	2397	2364		501	2702	2467	2044	501		2442	2397	501	2681	2427	1805				501		2444	2406		501	2682	2385	1616	501		2436	2191
502	2707	2404	2391		502	2397	2364		502	2702	2467	2044	502		2442	2397	502	2681	2427	1805				502		2444	2406		502	2682	2385	1616	502		2436	2191
503	2707	2404	2391		503	2397	2364		503	2702	2467	2044	503		2442	2397	503	2681	2427	1805				503		2444	2406		503	2682	2385	1616	503		2427	2191
504	2707	2404	2391		504	2397	2364		504	2702	2467	2044	504		2442	2397	504	2681	2427	1805				504		2444	2406		504	2682	2385	1616	504		2427	2191
505	2707	2404	2391		505	2397	2364		505	2702	2467	2044	505		2442	2397	505	2681	2427	1805				505		2444	2406		505	2682	2385	1601	505		2427	2191
506	2707	2404	2391		506	2397	2364		506	2702	2467	2044	506		2442	2397	506	2681	2427	1805				506		2444	2406		506	2682	2385	1601	506		2427	2191
507	2707	2404	2382		507	2397	2364		507	2702	2467	2044	507		2442	2397	507	2681	2427	1805				507		2444	2406		507	2682	2385	1601	507		2427	2191
508	2707	2404	2382		508	2397	2364		508	2702	2467	2044	508		2442	2397	508	2681	2427	1805				508		2444	2406		508	2682	2385	1601	508		2427	2191
509	2707	2404	2382		509	2397	2364		509	2702	2467	2044	509		2442	2397	509	2681	2427	1805				509		2444	2406		509	2682	2385	1601	509		2427	2191
510	2707	2404	2382		510	2397	2362		510	2702	2467	2044	510		2442	2397	510	2681	2427	1805				510		2444	2406		510	2682	2385	1601	510		2427	2191
511	2707	2404	2379		511	2397	2362		511	2695	2467	2042	511		2442	2397	511	2681	2427	1805				511		2444	2405		511	2682	2385	1601	511		2427	2191
512	2707	2404	2379		512	2397	2362		512	2695	2467	2042	512		2442	2397	512	2681	2427	1805				512		2444	2405		512	2682	2385	1601	512		2427	2191
513	2707	2404	2379		513	2397	2362		513	2695	2467	2042	513		2442	2397	513	2681	2427	1805				513		2444	2405		513	2682	2385	1601	513		2427	2191
514	2707	2404	2379		514	2397	2362		514	2695	2467	2042	514		2442	2397	514	2681	2427	1805				514		2444	2405		514	2682	2385	1601	514		2427	2191
515	2707	2404	2379		515	2397	2362		515	2695	2467	2042	515		2442	2397	515	2681	2427	1805				515		2444	2405		515	2682	2385	1601	515		2427	2191
516	2707	2404	2379		516	2397	2357		516	2695	2467	2042	516		2442	2397	516	2681	2427	1781				516		2444	2405		516	2682	2385	1596	516		2427	2191
517	2707	2404	2379		517	2397	2357		517	2695	2467	2042	517		2442	2397	517	2681	2427	1781				517		2444	2405		517	2682	2385	1596	517		2427	2189
518	2707	2404	2379		518	2397	2357		518	2695	2467	2041	518		2442	2397	518	2681	2427	1781				518		2444	2405		518	2682	2385	1596	518		2427	2189
519	2704	2404	2379		519	2397	2357		519	2695	2467	2041	519		2442	2397	519	2681	2427	1781				519		2444	2405		519	2682	2385	1596	519		2427	2189
520	2704	2404	2379		520	2397	2357		520	2695	2467	2041	520		2442	2397	520	2681	2427	1781				520		2444	2405		520	2682	2385	1596	520		2427	2189
521	2704	2404	2371		521	2397	2357		521	2695	2467	2041	521		2442	2394	521	2681	2427	1781				521		2444	2405		521	2682	2385	1596	521		2427	2189
522	2704	2404	2371		522	2397	2357		522	2695	2467	2041	522		2442	2394	522	2681	2427	1781				522		2444	2405		522	2682	2385	1596	522		2427	2189
523	2704	2404	2371		523	2397	2357		523	2695	2467	2041	523		2442	2394	523	2681	2427	1781				523		2444	2405		523	2682	2385	1596	523		2427	2189
524	2704	2404	2371		524	2397	2357		524	2695	2467	2041	524		2442	2394	524	2681	2427	1781				524		2444	2405		524	2682	2385	1596	524		2427	2189
525	2704	2404	2371		525	2397	2357		525	2695	2467	2041	525		2442	2394	525	2681	2427	1781				525		2444	2405		525	2682	2385	1596	525		2427	2189
526	2704	2404	2371		526	2397	2357		526	2695	2467	2039	526		2442	2394	526	2681	2427	1781				526		2444	2405		526	2682	2385	1596	526		2427	2189
527	2704	2404	2371		527	2397	2357		527	2695	2467	2039	527		2442	2394	527	2681	2427	1781				527		2444	2405		527	2682	2385	1596	527		2427	2189
528	2704	2404	2371		528	2397	2357		528	2695	2467	2039	528		2442	2394	528	2681	2427	1781				528		2444	2405		528	2682	2385	1596	528		2427	2189
529	2704	2404	2371		529	2397	2357		529	2695	2467	2039	529		2442	2394	529	2681	2427	1781				529		2444	2405		529	2682	2385	1596	529		2427	2182
530	2704	2404	2371		530	2397	2357		530	2695	2467	2039	530		2442	2394	530	2681	2427	1781				530		2444	2405		530	2682	2385	1596	530		2427	2157
531	2704	2404	2371		531	2397	2357		531	2695	2467	2039	531		2442	2394	531	2681	2427	1768				531		2444	2405		531	2682	2385	1596	531		2427	2157
532	2704	2404	2371		532	2397	2357		532	2695	2467	2039	532		2442	2394	532	2681	2427	1768				532		2444	2405		532	2682	2385	1596	532		2427	2157
533	2704	2404	2364		533	2397	2357		533	2695	2467	2039	533		2442	2394	533	2681	2427	1768				533		2444	2402		533	2682	2385	1596	533		2427	2157
534	2704	2404	2364		534	2397	2357		534	2695	2467	2039	534		2442	2394	534	2681	2427	1768				534		2444	2402		534	2682	2385	1596	534		2427	2157
535	2704	2404	2364		535	2397	2357		535	2695	2467	2039	535		2442	2394	535	2681	2427	1768				535		2444	2402		535	2682	2385	1596	535		2427	2157
536	2704	2404	2364		536	2397	2357		536	2695	2467	2039	536		2442	2394	536	2681	2427	1768				536		2444	2402		536	2682	2385	1596	536		2427	2157
537	2704	2404	2364		537	2397	2357		537	2695	2467	2039	537		2442	2392	537	2681	2427	1768				537		2444	2402		537	2682	2385	1596	537		2427	2157
538	2704	2404	2364		538	2397	2357		538	2695	2467	2027	538		2442	2392	538	2681	2427	1768				538		2444	2402		538	2682	2385	1596	538		2427	2157
539	2704	2404	2364		539	2397	2357		539	2695	2467	2027	539		2442	2392	539	2681	2427	1768				539		2444	2402		539	2682	2385	1596	539		2427	2157
540	2704	2404	2364		540	2397	2357		540	2695	2467	2027	540		2442	2391	540	2681	2427	1768				540		2444	2402		540	2682	2385	1596	540		2427	2157
541	2704	2404	2364		541	2397	2357		541	2695	2467	2027	541		2442	2391	541	2681	2427	1768				541		2444	2402		541	2682	2385	1596	541		2427	2157
542	2704	2404	2364		542	2397	2357		542	2695	2467	2027	542		2442	2391	542	2681	2427	1768				542		2444	2385		542	2682	2385	1596	542		2427	2157
543	2661	2404	2364		543	2397	2357		543	2695	2467	2027	543		2442	2384	543	2681	2427	1768				543		2444	2385		543	2682	2385	1596	543		2427	2157
544	2661	2404	2364		544	2397	2357		544	2695	2467	2027	544		2442	2384	544	2681	2427	1768				544		2444	2385		544	2682	2385	1596	544		2427	2157
545	2661	2404	2364		545	2397	2357		545	2695	2467	2027	545		2442	2384	545	2681	2427	1768				545		2444	2385		545	2682	2385	1596	545		2427	2157
546	2661	2404	2364		546	2397	2357		546	2695	2467	2019	546		2442	2384	546	2681	2427	1768				546		2444	2385		546	2682	2385	1596	546		2427	2157
547	2661	2404	2364		547	2397	2357		547	2695	2467	2019	547		2442	2384	547	2681	2427	1768				547		2444	2385		547	2682	2385	1596	547		2427	2157
548	2661	2404	2364		548	2397	2344		548	2695	2467	2019	548		2442	2384	548	2681	2427	1768				548		2444	2385		548	2682	2385	1596	548		2427	2157
549	2661	2404	2364		549	2397	2344		549	2695	2467	2019	549		2442	2384	549	2681	2427	1768				549		2444	2385		549	2682	2385	1593	549		2427	2157
550	2661	2404	2364		550	2397	2344		550	2695	2467	2019	550		2442	2384	550	2681	2427	1768				550		2444	2385		550	2682	2385	1593	550		2427	2157
551	2661	2404	2364		551	2397	2344		551	2695	2467	2019	551		2442	2384	551	2681	2427	1757				551		2444	2385		551	2682	2385	1593	551		2427	2157
552	2661	2404	2364		552	2397	2344		552	2695	2467	2019	552		2442	2384	552	2681	2427	1757				552		2444	2385		552	2682	2385	1593	552		2427	2157
553	2661	2404	2364		553	2397	2344		553	2695	2467	2019	553		2442	2384	553	2681	2427	1744				553		2444	2385		553	2682	2385	1593	553		2427	2157
554	2661	2404	2364		554	2397	2344		554	2695	2467	2019	554		2418	2384	554	2681	2427	1744				554		2444	2385		554	2682	2385	1593	554		2427	2157
555	2661	2404	2364		555	2397	2344		555	2695	2467	2019	555		2418	2384	555	2681	2427	1744				555		2444	2385		555	2682	2385	1593	555		2427	2157
556	2661	2404	2364		556	2397	2344		556	2695	2467	2019	556		2418	2384	556	2681	2427	1744				556		2444	2385		556	2682	2385	1593	556		2427	2157
557	2661	2404	2364		557	2397	2344		557	2695	2467	2019	557		2418	2384	557	2681	2427	1744				557		2444	2385		557	2682	2385	1593	557		2427	2157
558	2661	2404	2364		558	2397	2344		558	2695	2467	2019	558		2418	2384	558	2681	2427	1744				558		2444	2385		558	2682	2385	1593	558		2427	2157
559	2661	2404	2364		559	2397	2344		559	2695	2467	2019	559		2418	2384	559	2681	2427	1744				559		2444	2385		559	2682	2385	1593	559		2427	2157
560	2661	2404	2364		560	2397	2344		560	2695	2467	2019	560		2418	2384	560	2681	2427	1744				560		2444	2385		560	2682	2385	1590	560		2427	2157
561	2661	2404	2364		561	2397	2344		561	2695	2464	2019	561		2418	2383	561	2681	2427	1744				561		2444	2385		561	2682	2385	1590	561		2427	2153
562	2661	2404	2354		562	2397	2344		562	2695	2464	2019	562		2418	2383	562	2681	2427	1744				562		2444	2385		562	2682	2385	1590	562		2427	2153
563	2661	2404	2354		563	2397	2344		563	2695	2464	2019	563		2418	2383	563	2681	2427	1739				563		2444	2385		563	2682	2385	1590	563		2427	2153
564	2661	2404	2354		564	2397	2344		564	2695	2464	2019	564		2418	2383	564	2681	2427	1739				564		2444	2385		564	2682	2385	1590	564		2427	2152
565	2661	2404	2354		565	2397	2344		565	2695	2464	2019	565		2418	2383	565	2681	2427	1739				565		2444	2385		565	2682	2385	1590	565		2427	2152
566	2661	2404	2345		566	2397	2344		566	2695	2464	2019	566		2418	2379	566	2681	2427	1739				566		2444	2385		566	2682	2385	1590	566		2427	2152
567	2661	2404	2345		567	2397	2344		567	2695	2464	2019	567		2418	2379	567	2681	2427	1739				567		2444	2385		567	2682	2385	1590	567		2427	2152
568	2661	2404	2345		568	2397	2344		568	2695	2464	2019	568		2418	2379	568	2681	2427	1739				568		2444	2385		568	2682	2385	1590	568		2427	2152
569	2661	2404	2345		569	2397	2344		569	2695	2464	2019	569		2418	2379	569	2681	2427	1739				569		2444	2385		569	2682	2385	1590	569		2427	2152
570	2661	2404	2345		570	2397	2344		570	2695	2464	2019	570		2418	2379	570	2681	2427	1739				570		2444	2385		570	2682	2385	1590	570		2427	2152
571	2661	2404	2345		571	2397	2344		571	2695	2464	2019	571		2418	2379	571	2681	2427	1739				571		2444	2385		571	2682	2385	1590	571		2427	2152
572	2661	2404	2345		572	2397	2334		572	2695	2464	2019	572		2418	2379	572	2677	2427	1739				572		2444	2385		572	2682	2385	1590	572		2427	2152
573	2661	2404	2345		573	2397	2334		573	2695	2464	1977	573		2418	2379	573	2677	2427	1739				573		2444	2385		573	2682	2385	1590	573		2427	2150
574	2661	2404	2345		574	2397	2334		574	2695	2464	1977	574		2418	2379	574	2677	2427	1739				574		2444	2385		574	2682	2385	1590	574		2427	2150
575	2661	2404	2345		575	2397	2334		575	2695	2464	1977	575		2418	2379	575	2677	2427	1739				575		2444	2385		575	2682	2385	1590	575		2427	2150
576	2661	2404	2345		576	2397	2334		576	2695	2464	1977	576		2418	2379	576	2677	2427	1739				576		2444	2385		576	2682	2385	1588	576		2427	2150
577	2661	2404	2345		577	2397	2334		577	2695	2464	1977	577		2418	2379	577	2677	2427	1739				577		2444	2385		577	2682	2385	1588	577		2427	2150
578	2661	2404	2345		578	2397	2334		578	2695	2464	1977	578		2418	2379	578	2677	2427	1739				578		2444	2385		578	2682	2385	1588	578		2427	2150
579	2661	2404	2345		579	2397	2334		579	2695	2464	1977	579		2418	2379	579	2677	2427	1739				579		2439	2385		579	2682	2385	1588	579		2427	2150
580	2661	2404	2345		580	2397	2334		580	2695	2464	1977	580		2418	2379	580	2677	2427	1739				580		2439	2385		580	2682	2385	1588	580		2427	2147
581	2661	2404	2345		581	2397	2334		581	2695	2464	1977	581		2418	2379	581	2677	2427	1739				581		2439	2385		581	2682	2385	1588	581		2427	2147
582	2661	2404	2345		582	2397	2334		582	2695	2464	1977	582		2418	2378	582	2677	2427	1739				582		2439	2385		582	2682	2385	1588	582		2427	2147
583	2661	2404	2345		583	2397	2334		583	2695	2464	1977	583		2418	2378	583	2677	2427	1739				583		2439	2385		583	2682	2385	1588	583		2427	2147
584	2661	2404	2345		584	2397	2334		584	2685	2464	1977	584		2418	2378	584	2677	2427	1739				584		2439	2385		584	2682	2385	1588	584		2427	2147
585	2661	2404	2345		585	2397	2334		585	2685	2464	1977	585		2418	2378	585	2677	2427	1739				585		2439	2385		585	2682	2385	1588	585		2427	2147
586	2661	2404	2345		586	2397	2334		586	2685	2464	1977	586		2418	2378	586	2677	2427	1715				586		2439	2385		586	2682	2385	1588	586		2427	2147
587	2661	2404	2345		587	2397	2334		587	2685	2464	1977	587		2418	2378	587	2677	2427	1715				587		2439	2385		587	2682	2385	1588	587		2427	2147
588	2661	2404	2345		588	2397	2324		588	2685	2464	1977	588		2418	2378	588	2677	2427	1715				588		2439	2385		588	2682	2385	1588	588		2427	2147
589	2661	2404	2345		589	2397	2324		589	2685	2464	1977	589		2418	2378	589	2677	2427	1715				589		2439	2385		589	2682	2385	1588	589		2427	2147
590	2661	2404	2345		590	2397	2324		590	2685	2464	1977	590		2418	2378	590	2677	2427	1715				590		2439	2385		590	2682	2385	1587	590		2427	2147
591	2661	2404	2345		591	2397	2324		591	2685	2464	1977	591		2418	2378	591	2677	2427	1715				591		2439	2385		591	2682	2385	1587	591		2427	2147
592	2661	2404	2345		592	2397	2324		592	2685	2464	1977	592		2418	2378	592	2677	2427	1715				592		2439	2385		592	2682	2385	1576	592		2427	2147
593	2661	2404	2345		593	2397	2324		593	2685	2464	1977	593		2418	2378	593	2677	2427	1715				593		2439	2385		593	2682	2385	1576	593		2427	2147
594	2661	2404	2345		594	2397	2324		594	2685	2464	1977	594		2418	2378	594	2677	2427	1715				594		2439	2385		594	2682	2385	1572	594		2427	2147
595	2661	2404	2345		595	2397	2323		595	2685	2464	1977	595		2418	2378	595	2677	2427	1715				595		2439	2385		595	2682	2385	1572	595		2427	2147
596	2661	2404	2345		596	2397	2323		596	2685	2464	1977	596		2418	2378	596	2677	2427	1715				596		2439	2385		596	2682	2385	1572	596		2427	2147
597	2661	2404	2345		597	2397	2323		597	2685	2464	1977	597		2418	2378	597	2677	2427	1715				597		2439	2385		597	2682	2385	1572	597		2427	2147
598	2661	2404	2345		598	2397	2323		598	2685	2464	1977	598		2418	2378	598	2677	2427	1715				598		2439	2384		598	2682	2385	1568	598		2427	2147
599	2661	2404	2345		599	2397	2323		599	2685	2464	1977	599		2418	2378	599	2677	2427	1715				599		2439	2384		599	2682	2385	1568	599		2427	2147
600	2661	2404	2345		600	2397	2323		600	2685	2464	1977	600		2418	2378	600	2677	2427	1715				600		2439	2384		600	2682	2385	1568	600		2427	2147
601	2661	2404	2345		601	2397	2323		601	2685	2464	1977	601		2418	2378	601	2677	2427	1715				601		2439	2384		601	2682	2385	1568	601		2427	2147
602	2661	2404	2345		602	2397	2323		602	2685	2464	1977	602		2418	2378	602	2677	2427	1715				602		2439	2384		602	2682	2385	1568	602		2427	2147
603	2661	2404	2345		603	2397	2323		603	2685	2464	1977	603		2418	2376	603	2677	2427	1715				603		2439	2384		603	2682	2385	1568	603		2427	2147
604	2632	2404	2345		604	2397	2323		604	2682	2464	1977	604		2418	2376	604	2677	2427	1715				604		2439	2384		604	2682	2385	1568	604		2427	2147
605	2632	2404	2345		605	2397	2323		605	2682	2464	1977	605		2418	2376	605	2677	2427	1715				605		2439	2384		605	2682	2385	1556	605		2427	2147
606	2632	2404	2345		606	2397	2323		606	2682	2464	1977	606		2418	2376	606	2677	2427	1715				606		2439	2384		606	2682	2385	1556	606		2427	2147
607	2632	2404	2343		607	2397	2323		607	2682	2464	1977	607		2418	2376	607	2677	2427	1715				607		2439	2384		607	2682	2385	1556	607		2427	2147
608	2632	2404	2343		608	2397	2323		608	2682	2464	1977	608		2418	2376	608	2677	2427	1715				608		2439	2378		608	2682	2385	1556	608		2427	2142
609	2632	2404	2343		609	2397	2323		609	2682	2464	1977	609		2418	2376	609	2677	2427	1715				609		2439	2378		609	2682	2385	1556	609		2427	2142
610	2632	2404	2343		610	2397	2323		610	2682	2464	1977	610		2418	2370	610	2677	2427	1715				610		2439	2378		610	2682	2385	1556	610		2427	2142
611	2632	2404	2343		611	2397	2323		611	2682	2464	1977	611		2418	2370	611	2677	2427	1715				611		2439	2378		611	2682	2385	1556	611		2427	2142
612	2632	2404	2343		612	2397	2323		612	2682	2464	1977	612		2418	2370	612	2677	2427	1715				612		2439	2378		612	2682	2385	1556	612		2427	2142
613	2632	2404	2343		613	2397	2323		613	2682	2464	1977	613		2418	2370	613	2677	2427	1715				613		2439	2378		613	2682	2385	1549	613		2427	2123
614	2632	2404	2343		614	2397	2323		614	2682	2464	1977	614		2418	2370	614	2677	2427	1715				614		2439	2378		614	2682	2385	1549	614		2427	2123
615	2632	2404	2333		615	2397	2323		615	2682	2464	1977	615		2418	2370	615	2677	2427	1715				615		2439	2378		615	2682	2385	1549	615		2427	2123
616	2632	2404	2333		616	2397	2323		616	2682	2464	1977	616		2418	2370	616	2677	2427	1714				616		2439	2378		616	2682	2385	1549	616		2427	2123
617	2632	2404	2333		617	2397	2323		617	2639	2464	1977	617		2418	2370	617	2677	2427	1714				617		2439	2378		617	2682	2385	1549	617		2427	2123
618	2632	2404	2333		618	2397	2323		618	2639	2464	1977	618		2418	2370	618	2677	2427	1714				618		2439	2378		618	2682	2385	1549	618		2427	2123
619	2632	2404	2333		619	2397	2323		619	2639	2464	1977	619		2418	2370	619	2677	2427	1714				619		2439	2378		619	2682	2385	1549	619		2427	2123
620	2632	2404	2333		620	2397	2323		620	2639	2464	1977	620		2418	2370	620	2677	2427	1714				620		2439	2376		620	2682	2385	1549	620		2427	2123
621	2632	2404	2333		621	2397	2323		621	2639	2464	1977	621		2418	2367	621	2677	2427	1714				621		2439	2376		621	2682	2385	1549	621		2427	2123
622	2632	2404	2333		622	2397	2323		622	2639	2464	1977	622		2418	2367	622	2677	2427	1714				622		2439	2376		622	2682	2385	1549	622		2427	2123
623	2632	2404	2333		623	2397	2323		623	2639	2464	1977	623		2418	2367	623	2677	2427	1714				623		2439	2376		623	2682	2385	1549	623		2427	2123
624	2632	2404	2333		624	2397	2323		624	2639	2464	1977	624		2418	2367	624	2677	2427	1714				624		2439	2376		624	2682	2385	1549	624		2427	2123
625	2632	2404	2333		625	2397	2323		625	2639	2464	1977	625		2418	2367	625	2677	2427	1714				625		2433	2376		625	2682	2385	1549	625		2427	2112
626	2632	2404	2333		626	2397	2323		626	2639	2464	1977	626		2418	2367	626	2677	2427	1714				626		2433	2376		626	2682	2385	1549	626		2427	2112
627	2632	2404	2333		627	2397	2323		627	2639	2464	1974	627		2418	2367	627	2677	2427	1714				627		2433	2376		627	2682	2385	1549	627		2427	2112
628	2632	2404	2333		628	2397	2323		628	2639	2464	1974	628		2418	2367	628	2677	2427	1714				628		2433	2376		628	2682	2385	1549	628		2415	2112
629	2632	2404	2333		629	2397	2323		629	2639	2464	1974	629		2418	2367	629	2677	2427	1714				629		2433	2376		629	2682	2385	1549	629		2415	2112
630	2632	2404	2333		630	2397	2323		630	2639	2464	1974	630		2418	2367	630	2677	2427	1714				630		2433	2376		630	2682	2385	1549	630		2415	2112
631	2632	2404	2333		631	2397	2323		631	2639	2464	1974	631		2418	2367	631	2677	2427	1714				631		2433	2376		631	2682	2385	1549	631		2415	2112
632	2632	2404	2333		632	2397	2323		632	2639	2464	1974	632		2418	2367	632	2677	2427	1714				632		2433	2376		632	2682	2385	1549	632		2415	2112
633	2632	2404	2333		633	2397	2323		633	2639	2464	1972	633		2418	2367	633	2677	2427	1705				633		2433	2373		633	2682	2385	1549	633		2415	2112
634	2632	2404	2333		634	2397	2323		634	2639	2464	1972	634		2418	2367	634	2677	2427	1705				634		2433	2373		634	2682	2385	1549	634		2415	2112
635	2632	2404	2333		635	2397	2323		635	2639	2464	1972	635		2418	2367	635	2677	2427	1705				635		2433	2373		635	2682	2385	1549	635		2415	2112
636	2632	2404	2333		636	2397	2323		636	2639	2464	1972	636		2418	2367	636	2677	2427	1705				636		2433	2373		636	2682	2385	1549	636		2415	2112
637	2632	2404	2333		637	2397	2323		637	2639	2464	1972	637		2418	2367	637	2677	2427	1705				637		2433	2373		637	2682	2385	1549	637		2415	2112
638	2632	2404	2333		638	2397	2323		638	2639	2464	1972	638		2418	2367	638	2677	2427	1705				638		2433	2373		638	2682	2385	1549	638		2415	2112
639	2632	2404	2333		639	2397	2323		639	2639	2464	1972	639		2418	2367	639	2677	2427	1705				639		2433	2373		639	2682	2385	1549	639		2415	2112
640	2632	2404	2333		640	2397	2323		640	2639	2464	1972	640		2418	2367	640	2677	2427	1700				640		2433	2373		640	2682	2385	1549	640		2415	2112
641	2632	2404	2333		641	2397	2323		641	2639	2464	1972	641		2418	2367	641	2677	2427	1700				641		2433	2373		641	2682	2382	1549	641		2415	2112
642	2632	2404	2333		642	2397	2323		642	2639	2464	1972	642		2418	2367	642	2677	2427	1700				642		2433	2373		642	2682	2382	1549	642		2415	2112
643	2632	2404	2328		643	2397	2323		643	2639	2464	1972	643		2418	2367	643	2677	2427	1700				643		2433	2373		643	2682	2382	1549	643		2415	2112
644	2632	2404	2328		644	2397	2323		644	2639	2464	1972	644		2418	2367	644	2677	2427	1700				644		2433	2373		644	2682	2382	1549	644		2415	2112
645	2632	2404	2328		645	2397	2323		645	2639	2464	1972	645		2418	2367	645	2677	2427	1700				645		2433	2373		645	2682	2382	1549	645		2415	2112
646	2632	2404	2328		646	2397	2323		646	2639	2464	1972	646		2418	2367	646	2677	2427	1700				646		2433	2373		646	2682	2382	1549	646		2415	2112
647	2632	2404	2328		647	2397	2314		647	2639	2464	1972	647		2418	2367	647	2677	2427	1700				647		2433	2373		647	2682	2382	1549	647		2415	2112
648	2632	2404	2328		648	2397	2314		648	2639	2464	1972	648		2418	2367	648	2677	2427	1700				648		2433	2373		648	2682	2382	1549	648		2415	2112
649	2632	2404	2328		649	2397	2314		649	2639	2464	1972	649		2418	2367	649	2677	2427	1700				649		2433	2373		649	2682	2382	1549	649		2415	2112
650	2632	2404	2328		650	2397	2314		650	2639	2464	1948	650		2418	2367	650	2677	2427	1700				650		2433	2366		650	2682	2382	1549	650		2415	2112
651	2632	2404	2328		651	2397	2314		651	2639	2464	1948	651		2418	2367	651	2677	2427	1700				651		2433	2366		651	2682	2382	1549	651		2415	2112
652	2632	2404	2328		652	2397	2314		652	2639	2464	1948	652		2418	2367	652	2677	2427	1700				652		2433	2366		652	2682	2382	1549	652		2415	2112
653	2632	2404	2328		653	2397	2314		653	2639	2464	1948	653		2418	2367	653	2677	2427	1700				653		2433	2366		653	2682	2382	1549	653		2415	2108
654	2632	2404	2328		654	2397	2314		654	2639	2464	1948	654		2418	2367	654	2677	2427	1700				654		2433	2366		654	2682	2382	1549	654		2415	2108
655	2632	2404	2328		655	2397	2314		655	2639	2464	1948	655		2418	2367	655	2677	2427	1700				655		2433	2366		655	2682	2382	1549	655		2415	2108
656	2632	2404	2328		656	2397	2314		656	2639	2464	1948	656		2418	2366	656	2677	2427	1687				656		2433	2366		656	2682	2382	1544	656		2415	2108
657	2632	2404	2328		657	2397	2314		657	2639	2464	1948	657		2418	2366	657	2677	2427	1687				657		2433	2366		657	2682	2382	1544	657		2415	2092
658	2632	2404	2328		658	2397	2314		658	2639	2464	1948	658		2418	2366	658	2677	2427	1687				658		2433	2366		658	2682	2382	1544	658		2415	2092
659	2625	2404	2328		659	2397	2314		659	2639	2464	1948	659		2418	2366	659	2677	2427	1687				659		2433	2366		659	2682	2382	1544	659		2415	2092
660	2625	2404	2328		660	2397	2314		660	2639	2464	1948	660		2418	2366	660	2677	2427	1683				660		2433	2361		660	2682	2382	1542	660		2415	2092
661	2625	2404	2320		661	2397	2314		661	2639	2464	1948	661		2418	2366	661	2677	2427	1683				661		2433	2361		661	2682	2382	1542	661		2415	2092
662	2625	2404	2320		662	2397	2314		662	2639	2464	1948	662		2418	2366	662	2677	2427	1683				662		2433	2361		662	2682	2382	1542	662		2415	2088
663	2625	2404	2320		663	2397	2314		663	2639	2464	1948	663		2418	2366	663	2677	2427	1683				663		2433	2361		663	2682	2382	1542	663		2415	2088
664	2625	2404	2320		664	2397	2314		664	2639	2464	1948	664		2418	2366	664	2677	2427	1683				664		2433	2361		664	2682	2382	1538	664		2415	2088
665	2625	2404	2320		665	2397	2314		665	2639	2464	1948	665		2418	2366	665	2677	2427	1683				665		2433	2361		665	2682	2382	1538	665		2415	2088
666	2625	2404	2320		666	2397	2314		666	2639	2464	1948	666		2418	2366	666	2677	2427	1683				666		2433	2361		666	2682	2382	1538	666		2415	2088
667	2625	2404	2320		667	2397	2314		667	2639	2464	1948	667		2418	2366	667	2677	2427	1683				667		2433	2361		667	2682	2382	1538	667		2415	2088
668	2625	2404	2320		668	2397	2314		668	2639	2464	1948	668		2418	2366	668	2677	2427	1683				668		2433	2361		668	2682	2382	1538	668		2415	2088
669	2625	2404	2320		669	2397	2314		669	2639	2464	1948	669		2418	2366	669	2677	2427	1683				669		2433	2361		669	2682	2382	1538	669		2415	2088
670	2625	2404	2320		670	2397	2314		670	2639	2464	1948	670		2418	2366	670	2677	2427	1683				670		2433	2361		670	2682	2382	1538	670		2415	2088
671	2625	2404	2320		671	2397	2314		671	2639	2459	1948	671		2418	2355	671	2677	2427	1683				671		2433	2356		671	2682	2382	1538	671		2415	2088
672	2625	2404	2320		672	2397	2314		672	2639	2459	1948	672		2418	2355	672	2677	2427	1683				672		2433	2356		672	2682	2382	1538	672		2415	2088
673	2625	2404	2320		673	2397	2314		673	2639	2459	1948	673		2418	2355	673	2677	2427	1683				673		2433	2356		673	2682	2382	1538	673		2415	2088
674	2625	2404	2320		674	2397	2314		674	2639	2459	1948	674		2418	2355	674	2677	2427	1683				674		2433	2356		674	2682	2382	1538	674		2415	2088
675	2625	2404	2320		675	2397	2314		675	2639	2459	1948	675		2418	2355	675	2677	2427	1683				675		2433	2356		675	2682	2371	1538	675		2415	2088
676	2625	2404	2320		676	2397	2314		676	2639	2459	1948	676		2418	2355	676	2677	2427	1683				676		2433	2356		676	2682	2371	1538	676		2415	2088
677	2625	2404	2320		677	2397	2314		677	2639	2459	1948	677		2418	2355	677	2677	2427	1683				677		2433	2356		677	2682	2371	1538	677		2415	2088
678	2625	2404	2320		678	2397	2314		678	2639	2459	1945	678		2418	2355	678	2677	2427	1683				678		2433	2356		678	2682	2371	1538	678		2415	2062
679	2625	2404	2320		679	2397	2314		679	2639	2459	1945	679		2418	2355	679	2677	2427	1683				679		2433	2356		679	2682	2371	1538	679		2415	2062
680	2625	2404	2319		680	2397	2314		680	2639	2459	1945	680		2418	2355	680	2677	2427	1683				680		2433	2356		680	2682	2371	1538	680		2415	2062
681	2625	2404	2319		681	2397	2314		681	2639	2459	1945	681		2418	2355	681	2677	2427	1683				681		2433	2356		681	2682	2371	1538	681		2415	2062
682	2625	2404	2319		682	2397	2314		682	2639	2459	1945	682		2418	2355	682	2677	2427	1683				682		2433	2356		682	2682	2371	1538	682		2415	2062
683	2625	2404	2319		683	2397	2305		683	2639	2459	1945	683		2418	2355	683	2677	2427	1683				683		2433	2356		683	2682	2371	1538	683		2415	2062
684	2625	2404	2319		684	2397	2305		684	2639	2459	1945	684		2418	2355	684	2677	2427	1683				684		2433	2356		684	2682	2371	1538	684		2415	2062
685	2625	2404	2319		685	2397	2305		685	2639	2459	1945	685		2418	2355	685	2677	2427	1683				685		2433	2356		685	2682	2371	1535	685		2415	2062
686	2625	2404	2319		686	2397	2305		686	2639	2459	1945	686		2418	2355	686	2677	2427	1672				686		2433	2356		686	2682	2371	1535	686		2415	2062
687	2625	2404	2319		687	2397	2305		687	2639	2459	1945	687		2418	2355	687	2677	2427	1672				687		2433	2356		687	2682	2371	1535	687		2415	2062
688	2625	2404	2319		688	2397	2305		688	2639	2459	1945	688		2418	2355	688	2677	2427	1672				688		2433	2356		688	2682	2371	1535	688		2415	2062
689	2625	2404	2319		689	2397	2305		689	2639	2459	1945	689		2418	2355	689	2677	2427	1672				689		2433	2356		689	2682	2371	1535	689		2415	2062
690	2625	2404	2319		690	2397	2305		690	2639	2459	1945	690		2418	2355	690	2677	2427	1672				690		2433	2356		690	2682	2371	1535	690		2415	2062
691	2625	2404	2319		691	2397	2305		691	2639	2459	1911	691		2418	2355	691	2677	2427	1672				691		2433	2356		691	2682	2371	1535	691		2415	2062
692	2625	2404	2319		692	2397	2305		692	2639	2459	1911	692		2418	2355	692	2677	2427	1672				692		2433	2356		692	2682	2371	1535	692		2415	2062
693	2625	2404	2319		693	2397	2305		693	2639	2459	1911	693		2418	2355	693	2677	2427	1672				693		2433	2356		693	2682	2371	1535	693		2415	2062
694	2625	2404	2319		694	2397	2305		694	2639	2459	1911	694		2418	2355	694	2677	2427	1672				694		2433	2356		694	2682	2371	1535	694		2415	2062
695	2625	2404	2319		695	2397	2305		695	2639	2459	1911	695		2418	2355	695	2677	2425	1672				695		2433	2356		695	2682	2355	1535	695		2415	2062
696	2625	2404	2319		696	2397	2305		696	2639	2459	1911	696		2418	2355	696	2677	2425	1672				696		2433	2356		696	2682	2355	1535	696		2415	2062
697	2625	2404	2319		697	2397	2305		697	2639	2459	1911	697		2418	2355	697	2677	2425	1672				697		2433	2356		697	2682	2355	1535	697		2415	2062
698	2625	2404	2319		698	2397	2305		698	2639	2459	1911	698		2418	2355	698	2677	2425	1672				698		2433	2356		698	2682	2355	1535	698		2415	2062
699	2625	2404	2319		699	2397	2305		699	2639	2459	1911	699		2418	2355	699	2677	2425	1672				699		2433	2356		699	2682	2355	1535	699		2415	2062
700	2625	2404	2319		700	2397	2305		700	2639	2459	1911	700		2418	2344	700	2677	2425	1672				700		2433	2356		700	2682	2355	1535	700		2415	2062
701	2625	2404	2319		701	2397	2305		701	2639	2459	1911	701		2418	2344	701	2677	2425	1661				701		2433	2356		701	2682	2355	1535	701		2415	2062
702	2625	2404	2319		702	2397	1313		702	2639	2459	1911	702		2418	2344	702	2677	2425	1661				702		2433	2356		702	2682	2355	1535	702		2415	2062
703	2625	2404	2319		703	2397	1313		703	2639	2459	1911	703		2418	2344	703	2677	2425	1661				703		2433	2344		703	2682	2355	1535	703		2415	2062
704	2625	2404	2319		704	2397	1313		704	2639	2459	1911	704		2418	2344	704	2677	2425	1661				704		2433	2344		704	2682	2355	1535	704		2415	2062
705	2625	2404	2319		705	2397	1313		705	2639	2459	1911	705		2418	2344	705	2677	2425	1661				705		2433	2344		705	2682	2355	1535	705		2415	2062
706	2625	2404	2314		706	2397	1313		706	2639	2459	1911	706		2418	2344	706	2677	2425	1661				706		2433	2344		706	2682	2355	1535	706		2415	2062
707	2625	2404	2314		707	2397	1313		707	2639	2459	1911	707		2418	2344	707	2677	2425	1661				707		2433	2344		707	2682	2355	1535	707		2415	2062
708	2625	2404	2314		708	2397	1313		708	2639	2459	1911	708		2418	2344	708	2677	2425	1661				708		2433	2344		708	2682	2355	1535	708		2415	2062
709	2625	2404	2314		709	2397	1313		709	2639	2459	1911	709		2418	2344	709	2677	2425	1661				709		2433	2344		709	2682	2355	1535	709		2415	2062
710	2625	2404	2314		710	2397	1313		710	2639	2459	1911	710		2418	2344	710	2677	2425	1661				710		2433	2344		710	2682	2355	1535	710		2415	2062
711	2625	2404	2314		711	2397	1313		711	2639	2459	1911	711		2418	2344	711	2677	2425	1661				711		2433	2344		711	2682	2355	1535	711		2415	2062
712	2625	2404	2314		712	2397	1313		712	2639	2459	1911	712		2418	2344	712	2677	2425	1654				712		2433	2344		712	2682	2355	1535	712		2415	2062
713	2625	2404	2314		713	2397	1313		713	2639	2459	1911	713		2418	2344	713	2677	2425	1654				713		2433	2344		713	2682	2355	1535	713		2415	2062
714	2625	2404	2314		714	2397	1313		714	2639	2459	1911	714		2418	2344	714	2677	2425	1654				714		2433	2344		714	2682	2355	1535	714		2415	2062
715	2625	2404	2314		715	2397	1313		715	2639	2459	1911	715		2418	2344	715	2677	2425	1654				715		2433	2344		715	2682	2355	1535	715		2415	2062
716	2625	2404	2314		716	2397	1313		716	2639	2459	1911	716		2418	2344	716	2677	2425	1654				716		2433	2344		716	2682	2355	1535	716		2415	2062
717	2625	2404	2314		717	2397	1313		717	2639	2459	1911	717		2418	2344	717	2677	2425	1654				717		2433	2344		717	2682	2355	1535	717		2415	2062
718	2625	2404	2314		718	2397	1299		718	2639	2459	1911	718		2418	2344	718	2677	2425	1654				718		2433	2344		718	2682	2355	1535	718		2415	2062
719	2625	2404	2314		719	2397	1299		719	2639	2459	1911	719		2418	2344	719	2677	2425	1654				719		2433	2344		719	2682	2355	1535	719		2415	2062
720	2625	2404	2314		720	2397	1299		720	2639	2459	1911	720		2418	2344	720	2677	2425	1654				720		2433	2344		720	2682	2355	1504	720		2415	2062
721	2625	2404	2314		721	2397	1299		721	2639	2459	1911	721		2418	2344	721	2677	2425	1654				721		2433	2344		721	2682	2355	1504	721		2415	2062
722	2625	2404	2314		722	2397	1299		722	2639	2459	1911	722		2418	2344	722	2677	2425	1654				722		2433	2344		722	2682	2355	1504	722		2415	2062
723	2625	2404	2314		723	2397	1299		723	2639	2420	1911	723		2418	2344	723	2677	2425	1654				723		2433	2344		723	2682	2355	1504	723		2415	2062
724	2625	2404	2314		724	2397	1299		724	2639	2420	1911	724		2418	2344	724	2677	2425	1654				724		2433	2344		724	2682	2355	1504	724		2415	2062
725	2625	2404	2310		725	2397	1299		725	2639	2420	1911	725		2418	2344	725	2677	2425	1654				725		2433	2344		725	2682	2355	1504	725		2415	2062
726	2625	2404	2310		726	2397	1299		726	2639	2420	1911	726		2418	2344	726	2677	2425	1654				726		2433	2344		726	2682	2355	1504	726		2415	2062
727	2625	2404	2310		727	2397	1299		727	2639	2420	1911	727		2418	2344	727	2677	2425	1654				727		2433	2344		727	2682	2355	1504	727		2415	2062
728	2625	2404	2310		728	2397	1299		728	2639	2420	1911	728		2418	2344	728	2677	2425	1654				728		2433	2344		728	2682	2355	1504	728		2415	2062
729	2625	2404	2310		729	2397	1299		729	2639	2420	1911	729		2418	2344	729	2677	2425	1654				729		2433	2344		729	2682	2355	1504	729		2415	2062
730	2625	2404	2310		730	2397	1299		730	2639	2420	1911	730		2418	2344	730	2677	2425	1654				730		2433	2344		730	2682	2355	1504	730		2415	2062
731	2625	2404	2310		731	2397	1299		731	2639	2420	1911	731		2418	2344	731	2677	2425	1654				731		2433	2344		731	2682	2355	1504	731		2415	2062
732	2625	2404	2310		732	2397	1299		732	2639	2420	1911	732		2418	2344	732	2677	2425	1649				732		2433	2344		732	2682	2355	1504	732		2415	2062
733	2625	2404	2310		733	2397	1299		733	2639	2420	1911	733		2418	2344	733	2677	2425	1649				733		2433	2344		733	2682	2355	1504	733		2415	2062
734	2625	2404	2310		734	2397	1299		734	2639	2420	1911	734		2418	2344	734	2677	2425	1649				734		2433	2344		734	2682	2355	1504	734		2415	2062
735	2625	2404	2310		735	2397	1299		735	2639	2420	1911	735		2418	2344	735	2677	2425	1649				735		2433	2344		735	2682	2355	1504	735		2415	2062
736	2625	2404	2310		736	2397	1299		736	2639	2420	1911	736		2418	2344	736	2677	2425	1649				736		2433	2344		736	2682	2355	1504	736		2415	2062
737	2625	2404	2310		737	2397	1299		737	2639	2420	1911	737		2418	2344	737	2677	2425	1649				737		2433	2344		737	2682	2355	1504	737		2415	2062
738	2625	2404	2310		738	2397	1299		738	2639	2420	1911	738		2418	2344	738	2677	2376	1649				738		2433	2344		738	2682	2355	1497	738		2415	2062
739	2625	2404	2310		739	2397	1299		739	2639	2420	1911	739		2418	2344	739	2677	2376	1649				739		2433	2344		739	2682	2355	1497	739		2415	2062
740	2625	2404	2310		740	2397	1299		740	2639	2420	1911	740		2418	2344	740	2677	2376	1644				740		2433	2344		740	2682	2355	1497	740		2415	2062
741	2625	2404	2310		741	2397	1299		741	2639	2420	1911	741		2418	2343	741	2677	2376	1644				741		2433	2344		741	2682	2355	1497	741		2415	2062
742	2625	2404	2310		742	2397	1299		742	2639	2420	1911	742		2418	2343	742	2677	2376	1644				742		2433	2344		742	2682	2355	1497	742		2415	2062
743	2625	2404	2310		743	2397	1299		743	2639	2420	1911	743		2418	2343	743	2677	2376	1644				743		2433	2344		743	2682	2355	1497	743		2415	2062
744	2625	2404	2310		744	2397	1299		744	2639	2420	1911	744		2418	2343	744	2677	2376	1644				744		2433	2344		744	2682	2355	1497	744		2415	2062
745	2625	2404	2310		745	2397	1299		745	2639	2420	1911	745		2418	2343	745	2677	2376	1644				745		2433	2344		745	2682	2355	1497	745		2415	2062
746	2625	2404	2305		746	2397	1299		746	2639	2420	1911	746		2418	2343	746	2677	2376	1644				746		2433	2344		746	2682	2355	1497	746		2415	2062
747	2625	2404	2305		747	2397	1299		747	2639	2420	1911	747		2418	1347	747	2677	2376	1644				747		2433	2338		747	2682	2355	1497	747		2415	2062
748	2625	2404	2301		748	2397	1299		748	2639	2420	1911	748		2418	1347	748	2677	2376	1644				748		2433	2338		748	2682	2355	1497	748		2415	2062
749	2625	2404	2301		749	2397	1299		749	2639	2420	1911	749		2418	1347	749	2677	2376	1644				749		2433	2338		749	2682	2355	1497	749		2415	2062
750	2625	2404	2301		750	2397	1299		750	2639	2420	1911	750		2418	1347	750	2677	2376	1644				750		2433	2338		750	2682	2355	1497	750		2415	2062
751	2625	2404	2301		751	2397	1291		751	2639	2420	1911	751		2418	1347	751	2660	2376	1644				751		2433	2338		751	2682	2355	1497	751		2415	2062
752	2625	2404	2301		752	2397	1291		752	2639	2420	1911	752		2418	1347	752	2660	2376	1644				752		2433	2338		752	2682	2355	1497	752		2415	2062
753	2625	2404	2301		753	2397	1291		753	2639	2420	1911	753		2418	1347	753	2660	2376	1644				753		2433	2338		753	2682	2355	1497	753		2415	2062
754	2625	2404	2301		754	2397	1291		754	2639	2420	1911	754		2418	1347	754	2660	2376	1644				754		2433	2338		754	2682	2355	1496	754		2415	2062
755	2625	2404	2301		755	2397	1291		755	2639	2420	1911	755		2418	1347	755	2660	2376	1644				755		2433	2338		755	2682	2355	1496	755		2415	2062
756	2625	2404	2301		756	2397	1291		756	2639	2420	1891	756		2418	1347	756	2660	2376	1644				756		2433	2338		756	2682	2355	1496	756		2415	2062
757	2625	2404	2301		757	2397	1286		757	2639	2420	1891	757		2418	1347	757	2660	2376	1644				757		2433	2338		757	2682	2355	1496	757		2415	2062
758	2625	2404	2301		758	2397	1286		758	2639	2420	1891	758		2418	1347	758	2660	2376	1644				758		2433	2338		758	2682	2355	1496	758		2415	2062
759	2625	2404	2301		759	2397	1286		759	2639	2420	1891	759		2418	1347	759	2660	2376	1644				759		2433	2338		759	2682	2355	1496	759		2415	2062
760	2625	2404	2301		760	2397	1286		760	2639	2420	1891	760		2418	1347	760	2660	2376	1644				760		2433	2338		760	2682	2355	1496	760		2415	2062
761	2625	2404	2301		761	2397	1286		761	2639	2420	1891	761		2418	1347	761	2660	2376	1630				761		2433	2338		761	2682	2355	1496	761		2415	2042
762	2625	2404	2301		762	2397	1286		762	2639	2420	1891	762		2418	1347	762	2660	2376	1630				762		2433	2338		762	2682	2355	1496	762		2415	2042
763	2625	2404	2301		763	2397	1286		763	2639	2420	1891	763		2418	1347	763	2660	2376	1630				763		2433	2338		763	2682	2355	1495	763		2415	2042
764	2625	2404	2301		764	2397	1286		764	2639	2420	1891	764		2418	1347	764	2660	2376	1630				764		2433	2338		764	2682	2355	1495	764		2415	2042
765	2625	2404	2301		765	2397	1286		765	2639	2420	1891	765		2418	1347	765	2660	2376	1630				765		2433	2338		765	2682	2355	1493	765		2415	2042
766	2625	2404	2292		766	2397	1286		766	2639	2420	1891	766		2418	1347	766	2660	2376	1630				766		2433	2338		766	2682	2355	1493	766		2415	2042
767	2625	2404	2292		767	2397	1286		767	2639	2420	1891	767		2418	1347	767	2660	2376	1630				767		2433	2338		767	2682	2355	1493	767		2415	2042
768	2625	2404	2292		768	2397	1286		768	2639	2420	1891	768		2418	1347	768	2660	2376	1630				768		2433	2338		768	2682	2355	1493	768		2415	2038
769	2625	2404	2292		769	2397	1286		769	2639	2420	1891	769		2418	1347	769	2660	2376	1630				769		2433	2338		769	2682	2355	1493	769		2415	2038
770	2625	2404	2292		770	2397	1286		770	2639	2420	1891	770		2418	1347	770	2660	2376	1630				770		2433	2338		770	2682	2355	1493	770		2415	2038
771	2625	2404	2292		771	2397	1286		771	2639	2420	1891	771		2418	1347	771	2660	2376	1630				771		2433	2338		771	2682	2355	1493	771		2415	2038
772	2625	2404	2292		772	2397	1282		772	2639	2420	1891	772		2418	1347	772	2660	2376	1630				772		2433	2338		772	2682	2355	1493	772		2415	2038
773	2625	2404	2292		773	2397	1282		773	2639	2420	1891	773		2418	1347	773	2660	2376	1630				773		2433	2338		773	2682	2355	1493	773		2415	2038
774	2625	2404	2292		774	2397	1282		774	2639	2420	1891	774		2418	1347	774	2660	2376	1630				774		2433	2338		774	2682	2355	1493	774		2415	2038
775	2625	2404	2292		775	2397	1282		775	2639	2420	1891	775		2418	1347	775	2660	2376	1630				775		2433	2338		775	2682	2355	1493	775		2415	2038
776	2625	2404	2292		776	2397	1282		776	2639	2420	1891	776		2418	1347	776	2660	2376	1630				776		2433	2338		776	2682	2355	1493	776		2415	2038
777	2625	2404	2292		777	2397	1282		777	2639	2420	1891	777		2418	1347	777	2660	2376	1630				777		2433	2338		777	2682	2351	1493	777		2415	2038
778	2625	2404	2292		778	2397	1282		778	2639	2420	1891	778		2418	1347	778	2660	2376	1630				778		2433	2338		778	2682	2351	1493	778		2415	2038
779	2625	2404	2292		779	2397	1282		779	2639	2420	1891	779		2418	1347	779	2660	2376	1630				779		2433	2338		779	2682	2351	1493	779		2415	2038
780	2625	2404	2292		780	2397	1282		780	2639	2420	1891	780		2418	1347	780	2660	2376	1630				780		2433	2338		780	2682	2351	1493	780		2415	2038
781	2625	2404	2292		781	2397	1282		781	2639	2420	1891	781		2418	1347	781	2660	2376	1630				781		2433	2338		781	2682	2351	1493	781		2415	2031
782	2625	2404	2292		782	2397	1282		782	2639	2420	1891	782		2418	1347	782	2660	2376	1630				782		2433	2338		782	2682	2351	1493	782		2415	2031
783	2625	2404	2292		783	2397	1282		783	2639	2420	1891	783		2418	1347	783	2660	2376	1612				783		2433	2338		783	2682	2351	1493	783		2415	2031
784	2625	2404	2292		784	2397	1282		784	2639	2420	1891	784		2418	1347	784	2660	2376	1612				784		2433	2338		784	2682	2351	1493	784		2415	2031
785	2625	2404	2292		785	2397	1282		785	2639	2420	1891	785		2418	1347	785	2660	2376	1612				785		2433	2336		785	2682	2351	1477	785		2415	2031
786	2625	2404	2292		786	2397	1282		786	2639	2420	1891	786		2418	1347	786	2660	2376	1612				786		2433	2336		786	2682	2351	1477	786		2415	2031
787	2625	2404	2292		787	2397	1282		787	2639	2420	1891	787		2418	1347	787	2660	2376	1612				787		2433	2336		787	2682	2351	1477	787		2415	2031
788	2625	2404	2292		788	2397	1282		788	2639	2420	1879	788		2418	1343	788	2660	2376	1612				788		2433	2336		788	2682	2351	1477	788		2415	2031
789	2625	2404	2292		789	2397	1282		789	2639	2420	1879	789		2418	1343	789	2660	2376	1612				789		2433	2336		789	2682	2351	1477	789		2415	2031
790	2625	2404	2292		790	2397	1282		790	2639	2420	1879	790		2418	1343	790	2660	2376	1612				790		2433	2336		790	2682	2351	1477	790		2415	2031
791	2625	2404	2292		791	2397	1277		791	2639	2420	1879	791		2418	1343	791	2660	2376	1612				791		2433	2336		791	2682	2351	1477	791		2415	2031
792	2625	2404	2292		792	2397	1277		792	2639	2420	1879	792		2418	1343	792	2660	2376	1612				792		2433	2336		792	2682	2351	1477	792		2415	2031
793	2625	2404	2292		793	2397	1277		793	2639	2420	1879	793		2418	1343	793	2660	2376	1594				793		2433	2336		793	2682	2351	1477	793		2415	2031
794	2625	2404	2292		794	2397	1277		794	2639	2420	1879	794		2418	1343	794	2660	2376	1594				794		2433	2336		794	2682	2351	1477	794		2415	2031
795	2625	2404	2292		795	2397	1277		795	2639	2420	1879	795		2418	1343	795	2660	2376	1594				795		2433	2336		795	2682	2351	1477	795		2415	2031
796	2625	2404	2292		796	2397	1277		796	2639	2420	1879	796		2418	1343	796	2660	2376	1594				796		2433	2336		796	2682	2351	1477	796		2415	2031
797	2625	2404	2292		797	2397	1277		797	2639	2420	1879	797		2418	1343	797	2660	2376	1594				797		2433	2336		797	2682	2351	1477	797		2415	2031
798	2625	2404	2292		798	2397	1277		798	2639	2420	1879	798		2418	1343	798	2660	2376	1594				798		2433	2336		798	2682	2351	1477	798		2415	2031
799	2625	2404	2292		799	2397	1277		799	2639	2420	1879	799		2418	1343	799	2660	2376	1594				799		2433	2336		799	2682	2351	1477	799		2415	2031
800	2625	2404	2292		800	2397	1277		800	2639	2420	1879	800		2418	1343	800	2660	2376	1594				800		2433	2336		800	2682	2351	1477	800		2415	2031
801	2625	2404	2292		801	2397	1277		801	2639	2420	1879	801		2418	1343	801	2660	2376	1594				801		2433	2336		801	2682	2351	1475	801		2415	2031
802	2625	2404	2292		802	2397	1277		802	2636	2420	1868	802		2418	1343	802	2660	2376	1594				802		2433	2331		802	2682	2351	1475	802		2415	2031
803	2625	2404	2292		803	2397	1277		803	2636	2420	1868	803		2418	1343	803	2660	2376	1594				803		2433	2331		803	2682	2351	1475	803		2415	2031
804	2625	2404	2292		804	2397	1277		804	2636	2420	1868	804		2418	1343	804	2660	2376	1594				804		2433	2331		804	2682	2351	1475	804		2415	2031
805	2625	2404	2292		805	2397	1277		805	2636	2420	1868	805		2418	1343	805	2660	2376	1594				805		2433	2331		805	2682	2351	1475	805		2415	2031
806	2625	2404	2292		806	2397	1277		806	2636	2420	1868	806		2418	1343	806	2660	2376	1594				806		2433	2331		806	2682	2351	1475	806		2415	2031
807	2625	2404	2292		807	2397	1277		807	2636	2420	1868	807		2418	1343	807	2660	2376	1590				807		2433	2331		807	2682	2351	1475	807		2415	2031
808	2625	2404	2292		808	2397	1277		808	2636	2420	1868	808		2418	1343	808	2660	2376	1590				808		2433	2331		808	2682	2351	1475	808		2415	2031
809	2625	2404	2292		809	2397	1277		809	2636	2420	1868	809		2418	1343	809	2660	2376	1590				809		2433	2331		809	2682	2351	1465	809		2415	2031
810	2625	2404	2292		810	2397	1276		810	2636	2420	1868	810		2418	1343	810	2660	2376	1590				810		2433	2331		810	2682	2351	1465	810		2415	2031
811	2625	2404	2292		811	2397	1276		811	2636	2420	1868	811		2418	1343	811	2660	2376	1590				811		2433	2331		811	2682	2351	1465	811		2415	2031
812	2625	2404	2292		812	2397	1276		812	2636	2420	1868	812		2418	1343	812	2660	2376	1590				812		2433	2331		812	2682	2351	1465	812		2415	2031
813	2625	2404	2292		813	2397	1276		813	2636	2420	1868	813		2418	1343	813	2660	2376	1590				813		2433	2331		813	2682	2351	1465	813		2415	2031
814	2625	2404	2292		814	2397	1276		814	2636	2420	1868	814		2418	1343	814	2660	2376	1590				814		2433	2331		814	2682	2351	1465	814		2415	2031
815	2625	2404	2292		815	2397	1276		815	2636	2420	1868	815		2418	1343	815	2660	2376	1590				815		2433	2331		815	2682	2351	1465	815		2415	2031
816	2625	2404	2292		816	2397	1276		816	2636	2420	1868	816		2418	1343	816	2660	2376	1590				816		2433	2331		816	2682	2351	1465	816		2415	2025
817	2625	2404	2292		817	2397	1276		817	2636	2420	1868	817		2418	1343	817	2660	2376	1590				817		2433	2331		817	2682	2351	1465	817		2415	2025
818	2625	2404	2292		818	2397	1276		818	2636	2420	1868	818		2418	1343	818	2660	2376	1590				818		2433	2331		818	2682	2351	1465	818		2415	2025
819	2625	2404	2292		819	2397	1276		819	2636	2420	1868	819		2418	1343	819	2660	2376	1590				819		2433	2331		819	2682	2351	1465	819		2415	2025
820	2625	2404	2292		820	2397	1276		820	2636	2420	1868	820		2418	1343	820	2660	2376	1590				820		2433	2331		820	2682	2351	1465	820		2415	2004
821	2625	2404	2292		821	2397	1276		821	2636	2420	1868	821		2418	1343	821	2660	2376	1590				821		2433	2331		821	2682	2351	1465	821		2415	2004
822	2625	2404	2292		822	2397	1276		822	2636	2420	1868	822		2418	1343	822	2660	2376	1590				822		2433	2321		822	2682	2351	1465	822		2415	2004
823	2625	2404	2292		823	2397	1276		823	2636	2420	1868	823		2418	1343	823	2660	2376	1590				823		2433	2321		823	2682	2351	1465	823		2415	2004
824	2625	2404	2292		824	2397	1276		824	2636	2420	1868	824		2418	1343	824	2660	2376	1590				824		2433	2321		824	2682	2351	1465	824		2397	2004
825	2625	2404	2292		825	2397	1276		825	2636	2420	1868	825		2418	1343	825	2660	2376	1590				825		2433	2321		825	2682	2351	1465	825		2397	2004
826	2625	2404	2292		826	2397	1276		826	2636	2420	1868	826		2418	1315	826	2660	2376	1590				826		2433	2321		826	2682	2351	1465	826		2397	2004
827	2625	2404	2289		827	2397	1276		827	2636	2420	1868	827		2418	1315	827	2660	2376	1590				827		2433	2321		827	2682	2351	1465	827		2397	2004
828	2625	2404	2289		828	2397	1276		828	2636	2420	1868	828		2418	1315	828	2660	2376	1590				828		2433	2321		828	2682	2351	1465	828		2397	2004
829	2625	2404	2289		829	2397	1276		829	2636	2420	1868	829		2418	1315	829	2660	2376	1590				829		2433	2321		829	2682	2351	1465	829		2397	2004
830	2625	2404	2289		830	2397	1274		830	2636	2420	1868	830		2418	1315	830	2660	2376	1590				830		2433	2321		830	2682	2351	1465	830		2397	2004
831	2625	2404	2289		831	2397	1274		831	2636	2420	1868	831		2418	1315	831	2660	2376	1590				831		2433	2321		831	2682	2351	1465	831		2397	2004
832	2625	2404	2289		832	2397	1274		832	2636	2420	1868	832		2418	1315	832	2660	2376	1590				832		2433	2321		832	2682	2351	1465	832		2397	2004
833	2625	2404	2289		833	2397	1263		833	2636	2420	1868	833		2418	1315	833	2660	2376	1590				833		2433	2321		833	2682	2351	1465	833		2397	2004
834	2625	2404	2289		834	2397	1263		834	2636	2420	1868	834		2418	1315	834	2660	2376	1590				834		2433	2321		834	2682	2351	1465	834		2397	2004
835	2625	2404	2289		835	2397	1263		835	2636	2420	1868	835		2418	1315	835	2660	2376	1590				835		2433	2321		835	2682	2351	1465	835		2397	2004
836	2625	2404	2289		836	2397	1263		836	2636	2420	1868	836		2418	1315	836	2660	2376	1590				836		2433	2321		836	2682	2351	1465	836		2397	2004
837	2625	2404	2289		837	2397	1263		837	2636	2420	1868	837		2418	1315	837	2660	2376	1590				837		2433	2321		837	2682	2351	1465	837		2397	2004
838	2625	2404	2289		838	2397	1263		838	2636	2420	1868	838		2418	1315	838	2660	2376	1590				838		2433	2321		838	2682	2351	1465	838		2397	2004
839	2625	2404	2289		839	2397	1263		839	2636	2420	1868	839		2418	1315	839	2660	2376	1590				839		2433	2321		839	2682	2351	1465	839		2397	2004
840	2625	2404	2289		840	2397	1263		840	2636	2420	1868	840		2418	1315	840	2660	2376	1590				840		2433	2321		840	2682	2325	1465	840		2397	2004
841	2625	2404	2289		841	2397	1263		841	2636	2420	1868	841		2418	1312	841	2660	2376	1590				841		2433	1322		841	2682	2325	1465	841		2397	2004
842	2625	2404	2289		842	2397	1263		842	2636	2420	1868	842		2418	1312	842	2660	2376	1590				842		2433	1322		842	2682	2325	1465	842		2397	2004
843	2625	2404	2281		843	2397	1263		843	2636	2420	1868	843		2418	1312	843	2660	2376	1590				843		2433	1322		843	2682	2325	1465	843		2397	2004
844	2625	2404	2281		844	2397	1263		844	2636	2420	1868	844		2418	1312	844	2660	2376	1590				844		2433	1322		844	2682	2325	1465	844		2397	2004
845	2625	2404	2281		845	2397	1263		845	2636	2420	1868	845		2418	1312	845	2660	2376	1590				845		2433	1322		845	2682	2325	1465	845		2397	2004
846	2625	2404	2281		846	2397	1263		846	2636	2420	1868	846		2418	1312	846	2660	2376	1576				846		2433	1322		846	2682	2325	1446	846		2397	2004
847	2625	2404	2281		847	2397	1263		847	2636	2420	1868	847		2418	1312	847	2660	2376	1576				847		2433	1322		847	2682	2325	1446	847		2397	2004
848	2625	2404	2281		848	2397	1263		848	2636	2420	1868	848		2418	1312	848	2660	2376	1576				848		2433	1322		848	2682	2325	1446	848		2397	2004
849	2625	2404	2281		849	2397	1263		849	2636	2420	1868	849		2418	1312	849	2660	2376	1576				849		2433	1322		849	2682	2325	1446	849		2397	2004
850	2625	2404	2281		850	2397	1263		850	2636	2420	1868	850		2418	1312	850	2660	2376	1576				850		2433	1322		850	2682	2325	1446	850		2397	2004
851	2625	2404	2281		851	2397	1263		851	2636	2420	1868	851		2418	1312	851	2660	2376	1576				851		2433	1322		851	2682	2325	1446	851		2397	2004
852	2625	2404	2281		852	2397	1263		852	2636	2420	1868	852		2418	1312	852	2660	2376	1576				852		2433	1322		852	2682	2325	1446	852		2397	2004
853	2625	2404	2281		853	2397	1263		853	2630	2420	1868	853		2418	1312	853	2660	2376	1576				853		2433	1322		853	2682	2325	1446	853		2397	2004
854	2625	2404	2281		854	2397	1263		854	2630	2420	1868	854		2418	1312	854	2660	2376	1576				854		2433	1322		854	2682	2325	1446	854		2397	2004
855	2625	2404	2281		855	2397	1263		855	2630	2420	1868	855		2418	1312	855	2660	2376	1576				855		2433	1322		855	2682	2325	1446	855		2397	2004
856	2625	2404	2281		856	2397	1263		856	2630	2420	1868	856		2418	1312	856	2660	2376	1576				856		2433	1322		856	2682	2325	1446	856		2397	2004
857	2625	2404	2281		857	2397	1263		857	2630	2420	1868	857		2418	1304	857	2660	2376	1576				857		2433	1322		857	2682	2325	1446	857		2397	2004
858	2625	2404	2281		858	2397	1263		858	2630	2420	1855	858		2418	1304	858	2660	2376	1576				858		2433	1322		858	2682	2325	1446	858		2397	2004
859	2625	2404	2281		859	2397	1263		859	2630	2420	1855	859		2418	1304	859	2660	2376	1576				859		2433	1322		859	2682	2325	1446	859		2397	2004
860	2625	2404	2278		860	2397	1263		860	2630	2420	1855	860		2418	1304	860	2660	2376	1576				860		2433	1322		860	2682	2325	1446	860		2397	1999
861	2625	2404	2278		861	2397	1263		861	2630	2420	1844	861		2418	1302	861	2660	2376	1576				861		2433	1322		861	2682	2325	1446	861		2397	1999
862	2625	2404	2278		862	2397	1259		862	2630	2420	1844	862		2418	1302	862	2660	2376	1576				862		2433	1322		862	2682	2325	1446	862		2397	1999
863	2625	2404	2278		863	2397	1259		863	2630	2420	1844	863		2418	1302	863	2660	2376	1576				863		2433	1322		863	2682	2325	1446	863		2397	1999
864	2625	2404	2278		864	2397	1259		864	2630	2420	1844	864		2418	1302	864	2660	2376	1576				864		2433	1322		864	2682	2325	1446	864		2397	1999
865	2622	2404	2278		865	2397	1259		865	2630	2420	1843	865		2418	1302	865	2660	2376	1576				865		2433	1322		865	2682	2325	1446	865		2397	1996
866	2622	2404	2278		866	2397	1259		866	2630	2420	1843	866		2418	1302	866	2660	2376	1576				866		2433	1322		866	2682	2325	1446	866		2397	1996
867	2622	2404	2278		867	2397	1259		867	2630	2420	1843	867		2418	1302	867	2660	2376	1576				867		2433	1322		867	2682	2325	1446	867		2397	1996
868	2622	2404	2278		868	2397	1259		868	2630	2420	1843	868		2418	1302	868	2660	2376	1576				868		2433	1322		868	2682	2325	1446	868		2397	1996
869	2622	2404	2278		869	2397	1259		869	2630	2420	1843	869		2418	1302	869	2660	2376	1576				869		2433	1322		869	2682	2325	1446	869		2397	1996
870	2622	2404	2278		870	2397	1259		870	2630	2420	1843	870		2418	1302	870	2660	2376	1576				870		2433	1322		870	2682	2325	1446	870		2397	1996
871	2622	2404	2278		871	2397	1259		871	2630	2420	1843	871		2418	1302	871	2660	2376	1576				871		2433	1322		871	2682	2325	1446	871		2397	1996
872	2622	2404	2278		872	2397	1259		872	2630	2420	1843	872		2418	1302	872	2660	2376	1576				872		2433	1322		872	2682	2325	1446	872		2397	1996
873	2622	2404	2278		873	2397	1259		873	2630	2420	1843	873		2418	1302	873	2660	2376	1576				873		2433	1322		873	2682	2325	1446	873		2397	1996
874	2622	2404	2278		874	2397	1259		874	2630	2420	1843	874		2418	1302	874	2660	2376	1576				874		2433	1322		874	2682	2325	1446	874		2397	1996
875	2622	2404	2278		875	2397	1259		875	2630	2420	1843	875		2418	1302	875	2660	2376	1576				875		2433	1322		875	2682	2325	1446	875		2397	1996
876	2622	2404	2278		876	2397	1259		876	2630	2420	1843	876		2418	1302	876	2660	2376	1576				876		2433	1322		876	2682	2325	1446	876		2397	1996
877	2622	2404	2278		877	2397	1259		877	2579	2420	1843	877		2418	1302	877	2660	2376	1576				877		2406	1322		877	2682	2325	1446	877		2397	1996
878	2622	2404	2278		878	2397	1259		878	2579	2420	1843	878		2418	1302	878	2660	2376	1576				878		2406	1322		878	2682	2325	1446	878		2397	1996
879	2622	2404	2278		879	2397	1259		879	2579	2420	1843	879		2418	1302	879	2650	2376	1576				879		2406	1322		879	2682	2325	1446	879		2397	1996
880	2622	2404	2278		880	2397	1259		880	2579	2420	1833	880		2418	1302	880	2650	2376	1576				880		2406	1322		880	2682	2325	1446	880		2397	1996
881	2622	2404	2278		881	2397	1259		881	2579	2420	1833	881		2418	1302	881	2650	2376	1576				881		2406	1322		881	2682	2325	1446	881		2397	1996
882	2622	2404	2278		882	2397	1259		882	2579	2420	1833	882		2418	1302	882	2650	2376	1576				882		2406	1322		882	2682	2325	1446	882		2397	1996
883	2622	2404	2278		883	2397	1259		883	2579	2420	1833	883		2418	1302	883	2650	2376	1576				883		2406	1322		883	2682	2325	1446	883		2397	1996
884	2622	2404	2278		884	2397	1259		884	2579	2420	1833	884		2418	1302	884	2650	2376	1576				884		2406	1322		884	2682	2325	1446	884		2397	1996
885	2622	2404	2277		885	2397	1248		885	2579	2420	1833	885		2418	1302	885	2650	2376	1576				885		2406	1322		885	2682	2325	1446	885		2397	1996
886	2622	2404	2277		886	2397	1248		886	2579	2420	1833	886		2418	1302	886	2650	2376	1576				886		2406	1322		886	2682	2325	1446	886		2397	1996
887	2622	2404	2277		887	2397	1248		887	2579	2420	1833	887		2418	1302	887	2650	2376	1576				887		2406	1322		887	2682	2325	1446	887		2397	1996
888	2622	2404	2270		888	2397	1248		888	2579	2420	1833	888		2418	1300	888	2650	2376	1576				888		2406	1322		888	2682	2325	1446	888		2397	1984
889	2622	2404	2270		889	2397	1248		889	2579	2420	1833	889		2418	1300	889	2650	2376	1576				889		2406	1322		889	2682	2325	1446	889		2397	1984
890	2622	2404	2270		890	2397	1248		890	2579	2420	1833	890		2418	1300	890	2650	2376	1576				890		2406	1322		890	2682	2325	1445	890		2397	1984
891	2622	2404	2270		891	2397	1248		891	2579	2420	1833	891		2418	1300	891	2650	2376	1576				891		2406	1312		891	2682	2325	1445	891		2397	1984
892	2622	2404	2270		892	2397	1248		892	2579	2420	1833	892		2418	1300	892	2650	2376	1576				892		2406	1312		892	2682	2325	1445	892		2397	1984
893	2622	2404	2270		893	2397	1248		893	2579	2420	1833	893		2418	1300	893	2650	2376	1576				893		2406	1312		893	2682	2325	1445	893		2397	1984
894	2622	2404	2270		894	2397	1248		894	2579	2420	1833	894		2418	1300	894	2650	2376	1576				894		2406	1312		894	2682	2325	1445	894		2397	1984
895	2622	2404	2270		895	2397	1248		895	2579	2420	1833	895		2418	1300	895	2650	2376	1576				895		2406	1312		895	2682	2325	1445	895		2397	1984
896	2622	2404	2270		896	2397	1248		896	2579	2420	1833	896		2418	1300	896	2650	2376	1576				896		2406	1312		896	2682	2325	1445	896		2397	1984
897	2622	2404	2270		897	2397	1248		897	2579	2420	1833	897		2418	1300	897	2650	2376	1576				897		2406	1312		897	2682	2325	1445	897		2397	1984
898	2622	2404	2270		898	2397	1248		898	2579	2420	1833	898		2418	1300	898	2650	2376	1576				898		2406	1312		898	2682	2325	1445	898		2397	1984
899	2622	2404	2270		899	2397	1248		899	2579	2420	1833	899		2418	1300	899	2650	2376	1576				899		2406	1312		899	2682	2325	1445	899		2397	1984
900	2622	2404	2270		900	2397	1248		900	2579	2420	1803	900		2418	1300	900	2650	2376	1576				900		2406	1312		900	2682	2325	1445	900		2397	1984
901	2622	2404	2267		901	2397	1239		901	2579	2420	1803	901		2418	1300	901	2650	2376	1576				901		2406	1312		901	2682	2325	1445	901		2397	1984
902	2622	2404	2267		902	2397	1239		902	2579	2420	1803	902		2418	1300	902	2650	2376	1576				902		2406	1312		902	2682	2325	1445	902		2397	1984
903	2622	2404	2263		903	2397	1239		903	2579	2420	1803	903		2418	1300	903	2650	2376	1576				903		2406	1312		903	2682	2325	1445	903		2397	1984
904	2622	2404	2263		904	2397	1239		904	2579	2420	1803	904		2418	1300	904	2650	2376	1576				904		2406	1312		904	2682	2325	1445	904		2397	1984
905	2622	2404	2263		905	2397	1239		905	2579	2420	1803	905		2418	1300	905	2650	2376	1576				905		2406	1308		905	2682	2325	1445	905		2397	1984
906	2622	2404	2263		906	2397	1239		906	2579	2420	1803	906		2418	1300	906	2650	2376	1555				906		2406	1308		906	2682	2325	1445	906		2397	1984
907	2622	2404	2263		907	2397	1239		907	2579	2420	1803	907		2418	1300	907	2650	2376	1555				907		2406	1306		907	2682	2325	1445	907		2397	1984
908	2622	2404	2263		908	2397	1239		908	2579	2420	1803	908		2418	1300	908	2650	2376	1555				908		2406	1306		908	2682	2325	1435	908		2397	1984
909	2622	2404	2263		909	2397	1239		909	2579	2420	1803	909		2418	1300	909	2650	2376	1555				909		2406	1306		909	2682	2325	1435	909		2397	1984
910	2622	2404	2263		910	2397	1239		910	2579	2420	1803	910		2418	1300	910	2650	2376	1555				910		2406	1306		910	2682	2325	1435	910		2397	1984
911	2622	2404	2263		911	2397	1239		911	2579	2420	1803	911		2418	1300	911	2650	2376	1555				911		2406	1306		911	2682	2325	1435	911		2397	1984
912	2622	2404	2263		912	2397	1239		912	2579	2420	1803	912		2418	1296	912	2650	2376	1555				912		2406	1306		912	2682	2325	1435	912		2397	1984
913	2622	2404	2260		913	2397	1239		913	2579	2420	1803	913		2418	1296	913	2650	2376	1555				913		2406	1306		913	2682	2325	1435	913		2397	1984
914	2622	2404	2260		914	2397	1239		914	2579	2420	1803	914		2418	1296	914	2650	2376	1555				914		2406	1306		914	2682	2325	1435	914		2397	1984
915	2622	2404	2254		915	2397	1239		915	2579	2420	1803	915		2418	1296	915	2650	2376	1555				915		2406	1306		915	2682	2325	1435	915		2397	1729
916	2622	2404	2254		916	2397	1239		916	2579	2420	1803	916		2418	1295	916	2650	2376	1555				916		2406	1306		916	2682	2325	1435	916		2397	1729
917	2622	2404	2254		917	2397	1239		917	2579	2420	1803	917		2418	1295	917	2650	2376	1555				917		2406	1306		917	2682	2325	1435	917		2397	1729
918	2622	2404	2254		918	2397	1239		918	2579	2420	1803	918		2418	1295	918	2650	2376	1555				918		2406	1306		918	2682	2325	1435	918		2397	1729
919	2622	2404	2254		919	2397	1239		919	2579	2420	1803	919		2418	1295	919	2650	2376	1555				919		2406	1306		919	2682	2325	1435	919		2397	1729
920	2622	2404	2254		920	2397	1239		920	2579	2420	1803	920		2418	1295	920	2650	2376	1555				920		2406	1306		920	2682	2325	1435	920		2397	1729
921	2622	2404	2254		921	2397	1239		921	2579	2420	1803	921		2418	1295	921	2650	2376	1555				921		2406	1306		921	2682	2325	1435	921		2397	1729
922	2622	2404	2254		922	2397	1239		922	2579	2420	1803	922		2418	1295	922	2650	2376	1555				922		2406	1306		922	2682	2325	1435	922		2397	1729
923	2622	2404	2254		923	2397	1239		923	2579	2420	1803	923		2418	1295	923	2650	2376	1555				923		2406	1306		923	2682	2325	1435	923		2397	1729
924	2622	2404	2254		924	2397	1239		924	2579	2420	1803	924		2418	1295	924	2650	2376	1555				924		2406	1306		924	2682	2325	1435	924		2397	1729
925	2622	2404	2254		925	2397	1239		925	2579	2420	1803	925		2418	1295	925	2650	2376	1555				925		2406	1306		925	2682	2325	1435	925		2397	1729
926	2622	2404	2254		926	2397	1239		926	2579	2420	1803	926		2418	1295	926	2650	2376	1555				926		2406	1306		926	2682	2325	1435	926		2397	1729
927	2622	2404	2254		927	2397	1239		927	2579	2420	1803	927		2418	1295	927	2650	2376	1555				927		2406	1306		927	2682	2325	1435	927		2397	1729
928	2622	2404	2254		928	2397	1234		928	2579	2420	1803	928		2418	1295	928	2650	2376	1555				928		2406	1306		928	2682	2325	1435	928		2397	1729
929	2622	2404	2254		929	2397	1234		929	2579	2420	1803	929		2418	1295	929	2650	2376	1555				929		2406	1306		929	2682	2325	1435	929		2397	1729
930	2622	2404	2254		930	2397	1234		930	2579	2420	1803	930		2418	1295	930	2650	2376	1555				930		2406	1306		930	2682	2325	1435	930		2397	1729
931	2622	2404	2254		931	2397	1234		931	2579	2420	1803	931		2418	1295	931	2650	2376	1555				931		2406	1306		931	2682	2325	1435	931		2397	1729
932	2622	2404	2254		932	2397	1234		932	2579	2420	1803	932		2418	1295	932	2650	2376	1555				932		2406	1305		932	2682	2325	1435	932		2397	1729
933	2622	2404	2254		933	2397	1234		933	2579	2420	1803	933		2418	1295	933	2650	2376	1555				933		2406	1305		933	2682	2325	1435	933		2397	1729
934	2622	2404	2254		934	2397	1234		934	2579	2420	1803	934		2418	1295	934	2649	2376	1555				934		2406	1305		934	2682	2325	1435	934		2397	1729
935	2622	2404	2254		935	2397	1234		935	2579	2420	1803	935		2418	1295	935	2649	2376	1545				935		2406	1305		935	2682	2325	1435	935		2397	1729
936	2622	2404	2254		936	2397	1234		936	2579	2420	1803	936		2418	1295	936	2649	2376	1545				936		2406	1305		936	2682	2325	1435	936		2397	1729
937	2622	2404	2252		937	2397	1234		937	2579	2420	1803	937		2418	1295	937	2649	2376	1545				937		2406	1305		937	2682	2325	1435	937		2397	1729
938	2622	2404	2252		938	2397	1234		938	2579	2420	1803	938		2418	1293	938	2649	2376	1545				938		2406	1305		938	2682	2325	1435	938		2397	1729
939	2622	2404	2252		939	2397	1234		939	2579	2420	1803	939		2418	1293	939	2649	2376	1545				939		2406	1305		939	2682	2325	1435	939		2397	1729
940	2622	2404	2252		940	2397	1234		940	2579	2420	1803	940		2418	1293	940	2649	2376	1545				940		2406	1305		940	2682	2325	1417	940		2397	1729
941	2622	2404	2252		941	2397	1234		941	2579	2420	1803	941		2418	1293	941	2649	2376	1545				941		2406	1305		941	2682	2325	1417	941		2397	1729
942	2622	2404	2252		942	2397	1234		942	2579	2420	1803	942		2418	1293	942	2649	2376	1545				942		2406	1305		942	2682	2325	1417	942		2397	1729
943	2622	2404	2252		943	2397	1234		943	2579	2420	1803	943		2418	1293	943	2649	2376	1545				943		2406	1305		943	2682	2325	1417	943		2397	1729
944	2622	2404	2252		944	2397	1234		944	2579	2420	1803	944		2418	1293	944	2649	2376	1545				944		2406	1305		944	2682	2325	1417	944		2397	1729
945	2622	2404	2252		945	2397	1234		945	2579	2420	1803	945		2418	1293	945	2649	2376	1545				945		2406	1305		945	2682	2325	1417	945		2397	1729
946	2622	2404	2252		946	2397	1234		946	2579	2420	1803	946		2418	1293	946	2649	2376	1545				946		2406	1305		946	2682	2325	1417	946		2397	1729
947	2622	2404	2237		947	2397	1234		947	2579	2420	1803	947		2418	1293	947	2649	2376	1545				947		2406	1305		947	2682	2325	1417	947		2397	1729
948	2622	2404	2237		948	2397	1234		948	2579	2420	1803	948		2418	1293	948	2649	2376	1545				948		2406	1305		948	2682	2325	1417	948		2397	1729
949	2622	2404	2237		949	2397	1234		949	2579	2420	1803	949		2418	1293	949	2649	2376	1545				949		2406	1305		949	2682	2325	1417	949		2397	1729
950	2622	2404	2237		950	2397	1234		950	2579	2420	1803	950		2418	1293	950	2649	2376	1545				950		2406	1305		950	2682	2325	1417	950		2397	1729
951	2622	2404	1231		951	2397	1234		951	2579	2420	1803	951		2418	1293	951	2649	2376	1545				951		2406	1305		951	2682	2325	1417	951		2397	1729
952	2622	2404	1231		952	2397	1234		952	2579	2420	1803	952		2418	1293	952	2649	2376	1545				952		2406	1305		952	2682	2325	1417	952		2397	1729
953	2622	2404	1231		953	2397	1234		953	2579	2420	1803	953		2418	1293	953	2649	2376	1545				953		2406	1305		953	2682	2325	1417	953		2397	1729
954	2622	2404	1231		954	2397	1234		954	2579	2420	1803	954		2418	1293	954	2649	2376	1545				954		2406	1305		954	2682	2325	1417	954		2397	1729
955	2622	2404	1231		955	2397	1234		955	2579	2420	1803	955		2418	1293	955	2649	2376	1545				955		2406	1298		955	2682	2325	1417	955		2397	1729
956	2622	2404	1231		956	2397	1234		956	2579	2420	1803	956		2418	1293	956	2649	2376	1545				956		2406	1298		956	2682	2325	1417	956		2397	1729
957	2622	2404	1231		957	2397	1234		957	2579	2420	1803	957		2418	1293	957	2649	2376	1545				957		2406	1298		957	2682	2325	1417	957		2397	1729
958	2622	2404	1231		958	2397	1234		958	2579	2420	1803	958		2418	1293	958	2649	2376	1545				958		2406	1298		958	2682	2325	1417	958		2397	1729
959	2622	2404	1231		959	2397	1234		959	2579	2420	1803	959		2418	1293	959	2649	2376	1545				959		2406	1298		959	2682	2325	1417	959		2397	1729
960	2622	2404	1231		960	2397	1234		960	2579	2420	1803	960		2418	1288	960	2649	2376	1545				960		2406	1298		960	2682	2325	1417	960		2397	1729
961	2622	2404	1231		961	2397	1234		961	2579	2420	1803	961		2418	1288	961	2649	2376	1545				961		2406	1297		961	2682	2325	1417	961		2397	1729
962	2622	2404	1231		962	2397	1234		962	2579	2420	1803	962		2418	1288	962	2649	2376	1545				962		2406	1297		962	2682	2325	1417	962		2397	1729
963	2622	2404	1231		963	2397	1234		963	2579	2420	1803	963		2418	1288	963	2649	2376	1545				963		2406	1275		963	2682	2325	1417	963		2397	1729
964	2622	2404	1231		964	2397	1234		964	2579	2420	1803	964		2418	1288	964	2649	2376	1545				964		2406	1275		964	2682	2325	1417	964		2397	1729
965	2622	2404	1231		965	2397	1234		965	2579	2420	1803	965		2418	1288	965	2649	2376	1522				965		2406	1275		965	2682	2325	1417	965		2397	1729
966	2622	2404	1231		966	2397	1234		966	2579	2420	1803	966		2418	1288	966	2649	2376	1522				966		2406	1275		966	2682	2325	1417	966		2397	1729
967	2622	2404	1231		967	2397	1234		967	2579	2420	1803	967		2418	1288	967	2649	2376	1522				967		2406	1275		967	2682	2325	1417	967		2397	1729
968	2622	2404	1231		968	2397	1234		968	2579	2420	1803	968		2418	1284	968	2649	2376	1522				968		2406	1275		968	2682	2325	1417	968		2397	1729
969	2622	2404	1231		969	2397	1234		969	2579	2373	1803	969		2418	1284	969	2649	2376	1522				969		2401	1275		969	2682	2325	1417	969		2397	1729
970	2622	2404	1231		970	2397	1234		970	2579	2373	1803	970		2418	1284	970	2649	2376	1522				970		2401	1275		970	2682	2325	1417	970		2397	1729
971	2622	2404	1231		971	2397	1234		971	2579	2373	1803	971		2418	1284	971	2649	2376	1522				971		2401	1275		971	2682	2325	1417	971		2397	1729
972	2622	2404	1217		972	2397	1233		972	2579	2373	1803	972		2418	1284	972	2649	2376	1522				972		2401	1275		972	2682	2325	1417	972		2397	1729
973	2622	2404	1217		973	2397	1233		973	2579	2373	1803	973		2418	1284	973	2649	2376	1522				973		2401	1275		973	2682	2325	1417	973		2397	1729
974	2622	2404	1217		974	2397	1233		974	2579	2373	1803	974		2418	1284	974	2649	2376	1522				974		2401	1275		974	2682	2325	1417	974		2397	1729
975	2622	2404	1217		975	2397	1233		975	2579	2373	1803	975		2418	1284	975	2649	2376	1522				975		2401	1275		975	2682	2325	1417	975		2397	1729
976	2622	2404	1217		976	2397	1233		976	2579	2373	1803	976		2418	1284	976	2649	2376	1522				976		2401	1275		976	2682	2325	1417	976		2397	1729
977	2622	2404	1217		977	2397	1233		977	2579	2373	1803	977		2418	1284	977	2649	2376	1522				977		2401	1275		977	2682	2325	1417	977		2397	1729
978	2622	2404	1217		978	2397	1233		978	2579	2373	1803	978		2418	1284	978	2617	2376	1522				978		2401	1275		978	2682	2325	1416	978		2397	1725
979	2622	2404	1217		979	2397	1233		979	2579	2373	1803	979		2418	1284	979	2587	2376	1522				979		2401	1275		979	2682	2325	1416	979		2397	1725
980	2622	2404	1217		980	2397	1233		980	2579	2373	1803	980		2418	1284	980	2587	2376	1522				980		2401	1275		980	2682	2325	1416	980		2397	1720
981	2622	2404	1217		981	2397	1233		981	2565	2373	1803	981		2418	1281	981	2587	2376	1522				981		2401	1275		981	2669	2325	1416	981		2397	1720
982	2622	2404	1217		982	2397	1233		982	2565	2373	1803	982		2418	1281	982	2587	2376	1522				982		2401	1275		982	2669	2325	1416	982		2397	1720
983	2622	2404	1217		983	2397	1233		983	2565	2373	1803	983		2418	1281	983	2587	2376	1522				983		2401	1275		983	2669	2325	1416	983		2397	1720
984	2622	2404	1217		984	2397	1233		984	2565	2373	1803	984		2418	1281	984	2587	2376	1522				984		2382	1275		984	2669	2325	1416	984		2397	1720
985	2622	2404	1217		985	2397	1233		985	2565	2373	1803	985		2418	1281	985	2587	2376	1522				985		2382	1275		985	2669	2325	1416	985		2397	1720
986	2622	2404	1217		986	2397	1233		986	2565	2373	1803	986		2418	1281	986	2587	2376	1522				986		2382	1275		986	2669	2325	1416	986		2397	1720
987	2622	2404	1217		987	2397	1233		987	2565	2373	1803	987		2418	1281	987	2587	2376	1522				987		2382	1275		987	2669	2325	1416	987		2397	1720
988	2622	2404	1217		988	2397	1233		988	2565	2373	1783	988		2418	1281	988	2587	2376	1522				988		2382	1275		988	2669	2325	1414	988		2397	1720
989	2622	2404	1217		989	2397	1233		989	2565	2373	1783	989		2418	1281	989	2587	2376	1522				989		2382	1275		989	2669	2325	1414	989		2397	1720
990	2622	2404	1217		990	2397	1231		990	2565	2373	1783	990		2418	1281	990	2587	2376	1522				990		2382	1275		990	2669	2325	1414	990		2397	1720
991	2622	2404	1217		991	2397	1231		991	2565	2373	1783	991		2418	1281	991	2587	2376	1522				991		2382	1275		991	2669	2325	1414	991		2397	1720
992	2622	2404	1217		992	2397	1231		992	2565	2373	1783	992		2418	1281	992	2587	2376	1522				992		2382	1275		992	2669	2325	1414	992		2397	1720
993	2622	2404	1217		993	2397	1231		993	2565	2373	1783	993		2418	1281	993	2587	2376	1522				993		2382	1275		993	2669	2325	1406	993		2397	1720
994	2622	2404	1217		994	2397	1231		994	2565	2373	1783	994		2418	1281	994	2587	2376	1522				994		2382	1275		994	2669	2325	1406	994		2397	1720
995	2622	2404	1217		995	2397	1231		995	2565	2373	1783	995		2418	1268	995	2587	2376	1522				995		2382	1275		995	2669	2325	1406	995		2395	1720
996	2622	2404	1217		996	2397	1231		996	2565	2373	1783	996		2418	1268	996	2587	2376	1522				996		2382	1274		996	2669	2325	1405	996		2395	1720
997	2622	2404	1217		997	2397	1231		997	2565	2373	1783	997		2418	1268	997	2587	2376	1522				997		2382	1274		997	2669	2325	1405	997		2395	1720
998	2622	2404	1217		998	2397	1223		998	2565	2373	1783	998		2418	1268	998	2587	2376	1494				998		2382	1274		998	2669	2325	1405	998		2395	1720
999	2622	2404	1217		999	2397	1223		999	2565	2373	1783	999		2410	1268	999	2587	2376	1494				999		2382	1274		999	2669	2325	1405	999		2395	1720
1000	2622	2404	1217		1000	2397	1223		1000	2565	2373	1783	1000		2402	1268	1000	2587	2376	1494				1000		2382	1274		1000	2669	2325	1405	1000		2395	1720
	2622
	2622
	2622
	2622
	2622
	2622
	2622
	2622
	2622
	2622
	2622
	2620
	2620
	2620

## Sheet: Convergence 50
	Scenario 1					Scenario 2				Scenario 3				Scenario 4				Scenario 5							Scenario 6					Scenario 7				Scenario 8
	BWO	HS	HSBWO			HS	HSBWO			BWO	HS	HSBWO			HS	HSBWO		BWO	HS	HSBWO						HS	HSBWO			BWO	HS	HSBWO			HS	HSBWO
0	5210	2774	4555		0	2766	3580		0	5380	3003	4605	0		2998	3620	0	5320	3093	3740				0		3090	4710		0	5330	3327	3795	0		3078	3580
1	4045	2774	4555		1	2710	3580		1	4039	2871	4605	1		2815	3530	1	3918	3093	3470				1		3090	3515		1	4418	3327	2580	1		3078	3580
2	4045	2774	4555		2	2710	3580		2	4039	2871	3550	2		2815	3530	2	3918	3091	3470				2		2888	3515		2	4418	3133	2580	2		3078	3580
3	3773	2754	3745		3	2710	3375		3	3368	2871	3550	3		2815	3530	3	3504	3091	3470				3		2882	3515		3	3860	3133	2580	3		3078	3580
4	3773	2754	2958		4	2710	2860		4	3368	2871	3038	4		2815	2944	4	3504	3091	3124				4		2882	3126		4	3670	3133	2580	4		3078	2993
5	3518	2754	2958		5	2692	2860		5	3233	2871	3038	5		2815	2944	5	3257	3091	3124				5		2882	3126		5	3443	3133	2580	5		3078	2993
6	3518	2754	2958		6	2692	2860		6	3189	2871	3038	6		2815	2944	6	3257	3091	3124				6		2882	3126		6	3157	3133	2580	6		2937	2993
7	3518	2754	2958		7	2692	2860		7	3189	2800	3038	7		2815	2944	7	3257	3091	2650				7		2882	3126		7	3157	3133	2580	7		2937	2993
8	3518	2754	2958		8	2692	2860		8	3189	2800	3038	8		2815	2944	8	3257	3091	2650				8		2882	3126		8	3157	3133	2580	8		2937	2993
9	3518	2747	2797		9	2692	2807		9	3189	2800	3038	9		2815	2804	9	3257	3091	2650				9		2796	2950		9	3157	3133	2580	9		2937	2993
10	3425	2747	2797		10	2689	2807		10	3189	2800	3038	10		2815	2804	10	3257	3091	2650				10		2796	2950		10	3157	3133	2580	10		2937	2993
11	3425	2747	2797		11	2689	2807		11	3189	2800	3038	11		2795	2804	11	3257	3055	2650				11		2796	2950		11	3157	3133	2580	11		2937	2993
12	3147	2705	2797		12	2689	2807		12	3189	2800	3038	12		2795	2804	12	3257	3055	2650				12		2796	2950		12	3139	3133	2580	12		2937	2993
13	3147	2705	2797		13	2689	2807		13	3115	2800	3038	13		2795	2804	13	3202	3018	2650				13		2796	2950		13	3139	3133	2580	13		2937	2993
14	3147	2655	2693		14	2689	2760		14	3115	2800	2976	14		2795	2804	14	3202	3018	2650				14		2773	2950		14	3139	3133	2580	14		2800	2993
15	3147	2655	2693		15	2689	2760		15	3115	2800	2976	15		2795	2804	15	3202	2943	2650				15		2773	2950		15	3139	3133	2580	15		2800	2993
16	3147	2655	2693		16	2689	2760		16	3115	2800	2976	16		2795	2804	16	3202	2943	2650				16		2773	2950		16	3139	3133	2580	16		2800	2993
17	3147	2655	2693		17	2689	2760		17	3115	2800	2976	17		2795	2804	17	3202	2943	2650				17		2773	2950		17	3139	3133	2580	17		2800	2993
18	3147	2655	2693		18	2689	2760		18	3115	2800	2976	18		2795	2804	18	3202	2943	2650				18		2773	2950		18	3139	3133	2580	18		2800	2993
19	2897	2655	2693		19	2619	2760		19	3115	2800	2909	19		2795	2804	19	3202	2943	2650				19		2773	2950		19	3139	3133	2580	19		2800	2993
20	2897	2655	2693		20	2619	2760		20	3115	2800	2909	20		2795	2804	20	3202	2943	2650				20		2773	2950		20	3049	3133	2580	20		2800	2993
21	2897	2655	2693		21	2611	2760		21	3115	2800	2662	21		2795	2804	21	3202	2943	2650				21		2773	2950		21	3049	3133	2580	21		2800	2993
22	2897	2655	2693		22	2611	2760		22	3115	2800	2662	22		2748	2804	22	3202	2943	2650				22		2773	2950		22	3049	3133	2580	22		2800	2993
23	2897	2655	2693		23	2611	2760		23	3115	2800	2662	23		2748	2804	23	3202	2943	2650				23		2773	2950		23	3049	3129	2580	23		2800	2993
24	2897	2655	2693		24	2611	2760		24	3115	2800	2662	24		2748	2804	24	3202	2943	2650				24		2773	2950		24	3049	3129	2580	24		2800	2993
25	2897	2655	2693		25	2611	2760		25	3115	2800	2662	25		2748	2804	25	3202	2943	2650				25		2773	2950		25	3049	3129	2580	25		2800	2993
26	2897	2655	2693		26	2611	2760		26	3115	2800	2520	26		2748	2804	26	3202	2943	2650				26		2773	2950		26	3049	3129	2580	26		2800	2993
27	2897	2655	2693		27	2611	2760		27	3115	2800	2520	27		2748	2804	27	3202	2943	2650				27		2773	2950		27	3049	3115	2580	27		2800	2993
28	2897	2655	2693		28	2611	2760		28	3115	2800	2520	28		2705	2804	28	3202	2943	2650				28		2773	2950		28	3049	3115	2580	28		2800	2993
29	2897	2655	2693		29	2611	2740		29	3115	2800	2520	29		2705	2801	29	3202	2943	2650				29		2773	2950		29	3049	3115	2580	29		2800	2993
30	2897	2622	2693		30	2515	2740		30	3115	2800	2520	30		2630	2801	30	3202	2943	2650				30		2773	2950		30	3049	3115	2580	30		2800	2993
31	2897	2622	2693		31	2515	2740		31	3115	2800	2520	31		2630	2801	31	3202	2908	2650				31		2773	2950		31	3049	3115	2580	31		2800	2993
32	2897	2622	2693		32	2515	2740		32	3115	2800	2520	32		2630	2801	32	3202	2908	2650				32		2773	2950		32	3049	3115	2580	32		2800	2993
33	2897	2617	2693		33	2515	2740		33	3115	2800	2520	33		2630	2649	33	3097	2908	2650				33		2754	2950		33	3049	3115	2580	33		2800	2993
34	2897	2617	2619		34	2515	2740		34	3115	2792	2520	34		2630	2649	34	3097	2908	2650				34		2754	2950		34	3049	3060	2580	34		2800	2993
35	2897	2617	2619		35	2515	2740		35	3115	2760	2520	35		2630	2649	35	3097	2908	2650				35		2754	2950		35	3049	2978	2580	35		2800	2993
36	2897	2617	2619		36	2515	2740		36	3115	2760	2520	36		2630	2649	36	3097	2908	2650				36		2754	2950		36	3049	2978	2580	36		2800	2993
37	2897	2617	2619		37	2515	2740		37	3115	2732	2520	37		2630	2649	37	3097	2908	2620				37		2745	2950		37	3049	2978	2580	37		2800	2993
38	2897	2617	2619		38	2515	2740		38	3115	2660	2520	38		2630	2649	38	3097	2820	2620				38		2745	2950		38	3049	2978	2580	38		2800	2993
39	2897	2617	2619		39	2515	2740		39	3115	2660	2520	39		2630	2649	39	3097	2820	2620				39		2745	2823		39	3049	2978	2580	39		2800	2889
40	2897	2617	2619		40	2515	2390		40	3115	2660	2520	40		2630	2649	40	3097	2820	2620				40		2745	2823		40	3049	2978	2580	40		2800	2889
41	2897	2564	2619		41	2515	2390		41	3115	2660	2520	41		2630	2649	41	3097	2820	2620				41		2745	2823		41	3049	2978	2580	41		2800	2889
42	2897	2564	2619		42	2515	2390		42	3115	2660	2520	42		2630	2649	42	3097	2820	2620				42		2745	2823		42	3049	2978	2580	42		2800	2530
43	2897	2564	2619		43	2515	2390		43	3115	2644	2520	43		2630	2649	43	3097	2724	2620				43		2737	2823		43	3049	2978	2580	43		2800	2530
44	2897	2564	2619		44	2515	2390		44	3115	2644	2520	44		2630	2649	44	3097	2724	2620				44		2737	2823		44	3049	2978	2580	44		2800	2530
45	2897	2564	2619		45	2515	2390		45	3115	2644	2520	45		2630	2649	45	3097	2724	2620				45		2737	2823		45	3049	2978	2580	45		2787	2530
46	2897	2564	2619		46	2515	2390		46	3115	2644	2520	46		2630	2649	46	3097	2724	2620				46		2616	2823		46	3049	2978	2580	46		2787	2530
47	2897	2564	2619		47	2515	2390		47	3115	2644	2520	47		2561	2649	47	3097	2724	2620				47		2616	2823		47	3049	2883	2580	47		2713	2530
48	2897	2564	2619		48	2515	2390		48	3115	2619	2520	48		2561	2649	48	3097	2724	2620				48		2616	2823		48	3049	2883	2580	48		2713	2530
49	2897	2564	2619		49	2515	2390		49	3115	2619	2520	49		2561	2649	49	3097	2724	2620				49		2616	2823		49	3049	2883	2580	49		2713	2530
50	2897	2564	2619		50	2515	2390		50	3115	2619	2520	50		2561	2649	50	3097	2724	2620				50		2616	2823		50	3049	2883	2580	50		2713	2530
51	2897	2564	2619		51	2503	2390		51	3115	2619	2520	51		2561	2649	51	3097	2701	2620				51		2616	2823		51	3049	2883	2580	51		2713	2530
52	2897	2564	2619		52	2503	2390		52	3115	2619	2520	52		2561	2649	52	3097	2701	2620				52		2616	2823		52	3049	2883	2580	52		2713	2530
53	2897	2564	2619		53	2503	2390		53	3115	2562	2520	53		2561	2649	53	3097	2701	2620				53		2616	2823		53	3049	2842	2580	53		2713	2530
54	2897	2564	2619		54	2503	2390		54	3115	2562	2520	54		2561	2649	54	3097	2701	2620				54		2616	2823		54	3049	2842	2580	54		2713	2530
55	2897	2564	2619		55	2503	2390		55	3115	2562	2520	55		2561	2649	55	3097	2701	2620				55		2616	2823		55	3049	2842	2580	55		2713	2530
56	2897	2564	2619		56	2503	2390		56	3115	2562	2520	56		2561	2649	56	3097	2701	2620				56		2616	2823		56	3049	2842	2580	56		2713	2530
57	2897	2564	2619		57	2503	2390		57	3115	2562	2520	57		2561	2649	57	3097	2701	2620				57		2616	2823		57	3049	2842	2580	57		2713	2530
58	2897	2564	2619		58	2503	2390		58	3115	2562	2520	58		2561	2649	58	3097	2701	2620				58		2616	2823		58	3049	2842	2580	58		2713	2530
59	2897	2564	2619		59	2503	2390		59	3115	2562	2520	59		2561	2649	59	3097	2701	2620				59		2616	2823		59	3049	2842	2580	59		2713	2530
60	2897	2564	2434		60	2503	2390		60	3115	2562	2520	60		2561	2649	60	3097	2701	2620				60		2616	2823		60	3049	2842	2580	60		2713	2530
61	2897	2564	2434		61	2503	2390		61	3006	2562	2520	61		2549	2649	61	3097	2701	2620				61		2616	2823		61	3049	2842	2580	61		2713	2530
62	2897	2564	2434		62	2503	2390		62	3006	2562	2520	62		2549	2649	62	3022	2701	2620				62		2616	2823		62	3049	2842	2580	62		2713	2530
63	2897	2564	2434		63	2503	2390		63	3006	2562	2520	63		2549	2649	63	3022	2701	2620				63		2616	2823		63	3049	2842	2580	63		2713	2530
64	2897	2533	2434		64	2503	2390		64	3006	2562	2520	64		2549	2649	64	3022	2701	2620				64		2616	2823		64	3049	2842	2580	64		2713	2530
65	2897	2533	2434		65	2503	2390		65	3006	2562	2520	65		2549	2649	65	3022	2701	2620				65		2616	2823		65	3049	2842	2580	65		2713	2530
66	2897	2533	2434		66	2503	2390		66	3006	2562	2520	66		2549	2649	66	3022	2669	2620				66		2604	2814		66	3049	2842	2580	66		2713	2530
67	2897	2533	2434		67	2503	2390		67	3006	2562	2520	67		2549	2649	67	3022	2669	2620				67		2604	2814		67	3049	2842	2580	67		2713	2530
68	2897	2533	2434		68	2503	2390		68	3006	2562	2520	68		2549	2649	68	3022	2669	2620				68		2604	2814		68	3013	2842	2580	68		2713	2530
69	2897	2533	2434		69	2503	2390		69	3006	2562	2520	69		2549	2649	69	3022	2669	2620				69		2604	2814		69	3013	2842	2580	69		2713	2530
70	2897	2533	2434		70	2503	2390		70	3006	2562	2520	70		2549	2649	70	3022	2669	2620				70		2604	2814		70	3013	2842	2580	70		2713	2530
71	2897	2477	2434		71	2503	2390		71	3006	2562	2520	71		2549	2649	71	3022	2669	2620				71		2604	2814		71	3013	2842	2580	71		2641	2530
72	2897	2477	2434		72	2503	2390		72	3006	2562	2520	72		2549	2649	72	3022	2669	2620				72		2604	2814		72	3013	2842	2580	72		2641	2530
73	2897	2477	2434		73	2503	2390		73	3006	2561	2520	73		2539	2649	73	3022	2669	2620				73		2604	2814		73	3013	2842	2580	73		2641	2530
74	2897	2477	2434		74	2503	2390		74	3006	2561	2520	74		2539	2649	74	3022	2669	2620				74		2604	2814		74	3013	2677	2580	74		2641	2530
75	2897	2477	2434		75	2503	2390		75	3006	2561	2520	75		2539	2649	75	3022	2669	2620				75		2604	2814		75	3013	2677	2580	75		2641	2530
76	2897	2477	2434		76	2503	2390		76	3006	2561	2520	76		2539	2649	76	3022	2669	2620				76		2604	2814		76	3013	2677	2580	76		2641	2530
77	2897	2477	2434		77	2503	2390		77	3006	2561	2520	77		2539	2649	77	3022	2643	2620				77		2604	2814		77	3013	2677	2580	77		2641	2530
78	2897	2477	2434		78	2503	2390		78	3006	2561	2520	78		2539	2649	78	3022	2643	2620				78		2604	2814		78	3013	2677	2580	78		2641	2530
79	2897	2477	2434		79	2503	2390		79	3006	2523	2520	79		2539	2649	79	3022	2643	2620				79		2604	2814		79	3013	2677	2580	79		2641	2530
80	2897	2477	2434		80	2503	2352		80	3006	2523	2520	80		2539	2649	80	3022	2643	1874				80		2604	2814		80	3013	2677	2580	80		2641	2530
81	2897	2477	2434		81	2503	2352		81	3006	2523	2520	81		2539	2649	81	3022	2643	1874				81		2604	2814		81	3013	2677	2580	81		2641	2530
82	2897	2477	2434		82	2503	2352		82	3006	2523	2520	82		2539	2649	82	3022	2643	1874				82		2604	2814		82	3013	2677	2580	82		2641	2530
83	2897	2477	2434		83	2503	2352		83	3006	2523	2520	83		2539	2611	83	3022	2643	1874				83		2604	2814		83	3013	2677	2580	83		2641	2530
84	2897	2477	2434		84	2503	2352		84	3006	2523	2520	84		2524	2611	84	3022	2643	1874				84		2566	2814		84	3013	2677	2580	84		2641	2530
85	2897	2477	2434		85	2503	2352		85	3006	2523	2520	85		2524	2611	85	3022	2643	1874				85		2566	2814		85	3013	2677	2580	85		2641	2530
86	2897	2477	2434		86	2503	2352		86	3006	2523	2520	86		2524	2611	86	3022	2643	1874				86		2566	2814		86	3013	2677	2580	86		2641	2530
87	2897	2477	2434		87	2503	2352		87	3006	2523	2520	87		2524	2611	87	3022	2643	1874				87		2566	2814		87	3013	2677	2580	87		2641	2530
88	2897	2477	2434		88	2503	2352		88	3006	2523	2520	88		2524	2611	88	3022	2589	1874				88		2566	2814		88	3013	2677	2580	88		2641	2530
89	2897	2477	2434		89	2503	2352		89	3006	2523	2520	89		2524	2611	89	3022	2589	1874				89		2566	2814		89	3013	2677	2580	89		2636	2530
90	2897	2477	2434		90	2503	2352		90	3006	2523	2520	90		2524	2391	90	3022	2589	1874				90		2566	2814		90	3013	2677	2544	90		2636	2530
91	2897	2477	2434		91	2503	2352		91	3006	2523	2520	91		2524	2391	91	3022	2589	1874				91		2566	2814		91	3013	2677	2544	91		2636	2530
92	2897	2477	2434		92	2503	2352		92	3006	2523	2520	92		2524	2391	92	3022	2589	1874				92		2566	2814		92	3013	2677	2544	92		2636	2530
93	2897	2477	2397		93	2503	2352		93	3006	2523	2520	93		2524	2391	93	3022	2589	1874				93		2566	2814		93	3013	2677	2544	93		2636	2530
94	2857	2477	2397		94	2503	2352		94	3006	2523	2520	94		2524	2391	94	3022	2589	1874				94		2566	2745		94	3013	2677	2544	94		2636	2530
95	2857	2477	2397		95	2503	2352		95	3006	2523	2520	95		2524	2391	95	3022	2589	1874				95		2566	2745		95	3013	2677	2544	95		2634	2530
96	2857	2477	2397		96	2503	2352		96	3006	2523	2520	96		2524	2391	96	3022	2589	1874				96		2566	2745		96	3013	2677	2544	96		2634	2530
97	2857	2477	2397		97	2503	2352		97	3006	2523	2520	97		2524	2391	97	3022	2589	1874				97		2566	2745		97	3013	2677	2544	97		2634	2530
98	2857	2477	2397		98	2503	2352		98	3006	2523	2520	98		2524	2391	98	3022	2589	1874				98		2566	2745		98	3013	2677	2544	98		2600	2530
99	2857	2477	2397		99	2503	2352		99	3006	2523	2520	99		2524	2391	99	3022	2589	1874				99		2566	2745		99	3013	2677	2544	99		2600	2530
100	2857	2477	2397		100	2503	2352		100	3006	2523	2520	100		2524	2391	100	3022	2589	1874				100		2566	2745		100	3013	2677	2544	100		2600	2530
101	2857	2477	2397		101	2503	2352		101	3006	2523	2520	101		2524	2391	101	3022	2589	1874				101		2566	2745		101	3013	2677	2544	101		2600	2530
102	2857	2477	2397		102	2503	2352		102	3006	2523	2520	102		2524	2391	102	3022	2589	1874				102		2566	2745		102	3013	2677	2544	102		2600	2530
103	2857	2477	2397		103	2503	2352		103	3006	2523	2520	103		2524	2391	103	3022	2589	1874				103		2566	2745		103	3013	2677	2544	103		2600	2530
104	2857	2477	2397		104	2503	2352		104	3006	2523	2520	104		2524	2391	104	3022	2589	1874				104		2566	2745		104	3013	2677	2544	104		2600	2530
105	2857	2477	2397		105	2503	2352		105	3006	2523	2520	105		2524	2391	105	3022	2565	1874				105		2566	2745		105	3013	2677	2544	105		2600	2530
106	2857	2477	2397		106	2503	2352		106	3006	2523	2520	106		2524	2391	106	3022	2565	1874				106		2566	2745		106	3013	2677	2544	106		2600	2530
107	2857	2477	2397		107	2503	2352		107	3006	2523	2520	107		2524	2391	107	3022	2565	1874				107		2566	2745		107	3013	2677	2544	107		2600	2530
108	2857	2477	2397		108	2503	2352		108	3006	2523	2520	108		2517	2391	108	3022	2565	1874				108		2566	2745		108	3013	2677	2544	108		2600	2530
109	2857	2477	2397		109	2503	2352		109	3006	2520	2520	109		2517	2391	109	3022	2565	1874				109		2566	2745		109	3013	2677	2544	109		2600	2530
110	2857	2477	2397		110	2503	2352		110	3006	2520	2520	110		2517	2391	110	3022	2565	1874				110		2566	2745		110	3013	2677	2544	110		2600	2530
111	2857	2477	2397		111	2503	2351		111	3006	2520	2520	111		2517	2391	111	3022	2528	1874				111		2566	2745		111	3013	2677	2544	111		2600	2530
112	2857	2477	2397		112	2503	2351		112	3006	2520	2520	112		2517	2391	112	3022	2528	1874				112		2566	2745		112	3013	2677	2544	112		2600	2530
113	2857	2477	2397		113	2503	2351		113	3006	2520	2520	113		2517	2391	113	3022	2528	1874				113		2541	2745		113	3013	2677	2544	113		2600	2530
114	2857	2477	2397		114	2503	2351		114	3006	2520	2520	114		2517	2391	114	3022	2528	1874				114		2541	2745		114	3013	2677	2544	114		2600	2530
115	2857	2477	2397		115	2503	2351		115	3006	2520	2520	115		2517	2391	115	3022	2528	1874				115		2541	2745		115	3013	2677	2544	115		2600	2530
116	2857	2477	2397		116	2503	2351		116	3006	2520	2520	116		2517	2391	116	3022	2528	1874				116		2541	2745		116	3013	2677	2544	116		2600	2530
117	2857	2477	2397		117	2503	2351		117	3006	2520	2520	117		2517	2391	117	3022	2528	1874				117		2541	2745		117	3013	2677	2544	117		2600	2530
118	2857	2477	2397		118	2503	2351		118	3006	2520	2520	118		2517	2391	118	3022	2528	1874				118		2541	2745		118	3013	2677	2544	118		2600	2530
119	2857	2477	2397		119	2503	2351		119	3006	2520	2520	119		2517	2391	119	3022	2528	1874				119		2541	2739		119	3013	2677	2544	119		2600	2530
120	2857	2477	2397		120	2503	2351		120	2959	2520	2520	120		2517	2391	120	3022	2528	1874				120		2541	2739		120	3013	2677	2544	120		2600	2530
121	2857	2477	2397		121	2503	2351		121	2959	2520	2520	121		2517	2391	121	3022	2528	1874				121		2541	2739		121	3013	2677	2544	121		2600	2530
122	2857	2477	2362		122	2503	2351		122	2914	2520	2520	122		2517	2391	122	3022	2528	1874				122		2541	2739		122	3013	2677	2544	122		2600	2530
123	2857	2477	2362		123	2503	2351		123	2914	2520	2520	123		2517	2391	123	3022	2528	1874				123		2541	2739		123	3013	2677	2544	123		2600	2530
124	2857	2477	2362		124	2503	2351		124	2914	2520	2520	124		2517	2391	124	3022	2528	1874				124		2541	2696		124	3013	2677	2544	124		2600	2530
125	2857	2477	2362		125	2503	2351		125	2914	2520	2520	125		2517	2391	125	3022	2528	1874				125		2541	2696		125	3013	2677	2544	125		2600	2510
126	2857	2477	2362		126	2503	2351		126	2914	2520	2520	126		2517	2391	126	3022	2528	1874				126		2541	2696		126	3013	2677	2544	126		2600	2510
127	2857	2477	2362		127	2503	2351		127	2914	2520	2520	127		2517	2355	127	3022	2528	1874				127		2541	2696		127	3013	2677	2544	127		2600	2510
128	2857	2477	2362		128	2503	2351		128	2914	2520	2520	128		2517	2355	128	3022	2528	1874				128		2541	2696		128	3013	2677	2544	128		2600	2510
129	2850	2477	2362		129	2503	2351		129	2891	2520	2520	129		2517	2355	129	3022	2528	1874				129		2541	2663		129	3013	2677	2544	129		2600	2510
130	2850	2477	2362		130	2503	2351		130	2891	2519	2520	130		2517	2355	130	3022	2528	1874				130		2541	2663		130	3013	2677	2544	130		2600	2510
131	2850	2477	2362		131	2503	2351		131	2891	2519	2520	131		2517	2336	131	3022	2528	1874				131		2541	2663		131	3013	2677	2544	131		2600	2510
132	2850	2477	2362		132	2503	2351		132	2891	2519	2520	132		2517	2336	132	3022	2528	1874				132		2541	2663		132	3013	2677	2544	132		2600	2510
133	2850	2477	2362		133	2503	2351		133	2891	2519	2505	133		2517	2336	133	3022	2528	1874				133		2541	2663		133	3013	2677	2544	133		2600	2510
134	2850	2477	2362		134	2503	2351		134	2891	2519	2505	134		2517	2336	134	3022	2528	1874				134		2541	2663		134	3013	2677	2544	134		2600	2510
135	2850	2477	2362		135	2503	2351		135	2891	2519	2505	135		2517	2336	135	3022	2528	1874				135		2541	2663		135	3013	2677	2544	135		2600	2510
136	2850	2477	2362		136	2503	2351		136	2891	2519	2505	136		2517	2336	136	3022	2528	1874				136		2541	2663		136	3013	2677	2544	136		2600	2510
137	2850	2477	2362		137	2503	2351		137	2891	2519	2505	137		2517	2336	137	3022	2528	1874				137		2541	2663		137	3013	2677	2544	137		2600	2510
138	2800	2477	2362		138	2503	2351		138	2891	2519	2505	138		2517	2336	138	3022	2528	1874				138		2541	2663		138	3013	2677	2544	138		2600	2510
139	2800	2477	2362		139	2503	2351		139	2891	2519	2505	139		2510	2336	139	3022	2528	1874				139		2541	2663		139	3013	2677	2544	139		2600	2510
140	2800	2477	2362		140	2503	2351		140	2891	2519	2505	140		2510	2336	140	3022	2528	1874				140		2541	2663		140	3013	2677	2544	140		2600	2510
141	2800	2477	2362		141	2503	2351		141	2891	2519	2505	141		2510	2336	141	3022	2528	1874				141		2541	2663		141	3013	2677	2544	141		2600	2510
142	2800	2477	2362		142	2503	2351		142	2891	2519	2505	142		2510	2336	142	3022	2528	1874				142		2541	2663		142	3013	2677	2544	142		2600	2510
143	2800	2477	2362		143	2503	2351		143	2891	2500	2505	143		2510	2336	143	3022	2528	1874				143		2541	2663		143	3013	2677	2544	143		2600	2510
144	2800	2477	2362		144	2503	2351		144	2891	2500	2505	144		2510	2336	144	2969	2528	1874				144		2541	2663		144	3013	2677	2544	144		2600	2510
145	2800	2477	2362		145	2503	2351		145	2891	2500	2505	145		2510	2336	145	2969	2528	1874				145		2541	2663		145	3013	2677	2544	145		2600	2510
146	2800	2477	2362		146	2503	2351		146	2891	2500	2505	146		2510	2336	146	2853	2528	1874				146		2541	2663		146	3013	2677	2544	146		2600	2510
147	2800	2477	2362		147	2503	2351		147	2891	2500	2505	147		2510	2336	147	2853	2528	1874				147		2486	2663		147	3013	2677	2544	147		2600	2510
148	2800	2477	2362		148	2503	2351		148	2871	2500	2505	148		2510	2336	148	2853	2528	1874				148		2486	2663		148	3013	2677	2544	148		2600	2510
149	2800	2477	2362		149	2503	2351		149	2871	2500	2505	149		2510	2336	149	2853	2528	1874				149		2486	2663		149	3013	2677	2544	149		2600	2510
150	2800	2477	2362		150	2503	2351		150	2851	2500	2505	150		2510	2336	150	2853	2528	1874				150		2486	2663		150	3013	2677	2544	150		2600	2510
151	2800	2477	2362		151	2503	2351		151	2851	2500	2505	151		2510	2336	151	2853	2528	1874				151		2486	2663		151	3013	2677	2544	151		2600	2510
152	2800	2477	2362		152	2503	2351		152	2851	2500	2505	152		2510	2336	152	2853	2528	1874				152		2486	2663		152	3013	2677	2544	152		2600	2510
153	2800	2477	2350		153	2503	2351		153	2851	2500	2505	153		2510	2336	153	2853	2528	1874				153		2486	2663		153	3013	2640	2544	153		2600	2510
154	2800	2477	2350		154	2503	2351		154	2851	2500	2505	154		2510	2336	154	2853	2528	1874				154		2486	2663		154	3013	2640	2544	154		2600	2510
155	2800	2477	2350		155	2503	2351		155	2851	2500	2505	155		2510	2336	155	2853	2528	1874				155		2486	2663		155	3013	2640	2544	155		2600	2510
156	2800	2477	2350		156	2503	2351		156	2851	2500	2505	156		2510	2336	156	2853	2528	1874				156		2486	2663		156	3013	2640	2544	156		2600	2510
157	2800	2477	2350		157	2503	2351		157	2851	2500	2505	157		2510	2336	157	2853	2528	1874				157		2486	2663		157	3013	2640	2544	157		2600	2510
158	2800	2477	2350		158	2503	2351		158	2851	2500	2505	158		2510	2336	158	2853	2528	1874				158		2486	2663		158	3013	2640	2544	158		2600	2510
159	2800	2477	2350		159	2503	2351		159	2851	2500	2505	159		2510	2336	159	2853	2528	1874				159		2486	2663		159	3013	2640	2544	159		2600	2510
160	2800	2477	2350		160	2503	2351		160	2851	2500	2505	160		2510	2336	160	2853	2528	1874				160		2486	2663		160	3013	2640	2544	160		2600	2510
161	2800	2477	2350		161	2503	2351		161	2851	2500	2505	161		2510	2336	161	2853	2528	1874				161		2486	2663		161	3013	2640	2544	161		2600	2510
162	2800	2477	2350		162	2503	2351		162	2851	2500	2505	162		2510	2336	162	2853	2528	1874				162		2486	2663		162	3013	2640	2544	162		2600	2510
163	2800	2477	2350		163	2503	2351		163	2851	2500	2505	163		2510	2336	163	2853	2528	1874				163		2486	2663		163	3013	2640	2544	163		2600	2510
164	2800	2477	2350		164	2503	2351		164	2851	2500	2505	164		2510	2336	164	2853	2528	1874				164		2486	2663		164	3013	2640	2544	164		2600	2510
165	2800	2477	2350		165	2503	2351		165	2851	2500	2505	165		2510	2336	165	2853	2528	1874				165		2486	2663		165	3013	2640	2544	165		2600	2510
166	2800	2477	2350		166	2503	2351		166	2851	2500	2505	166		2510	2336	166	2853	2528	1874				166		2486	2663		166	3013	2640	2544	166		2600	2510
167	2800	2477	2350		167	2503	2351		167	2851	2500	2505	167		2504	2336	167	2853	2528	1874				167		2486	2663		167	3013	2640	2544	167		2600	2488
168	2800	2477	2350		168	2503	2351		168	2851	2500	2505	168		2504	2336	168	2853	2528	1874				168		2486	2663		168	3013	2640	2544	168		2554	2488
169	2800	2477	2350		169	2503	2351		169	2851	2500	2505	169		2504	2336	169	2853	2528	1874				169		2486	2663		169	2964	2640	1921	169		2554	2488
170	2800	2477	2350		170	2503	2351		170	2851	2500	2505	170		2504	2336	170	2853	2528	1874				170		2486	2663		170	2964	2640	1921	170		2554	2488
171	2800	2477	2350		171	2503	2351		171	2851	2500	2505	171		2504	2336	171	2853	2528	1874				171		2486	2663		171	2964	2640	1921	171		2554	2488
172	2800	2477	2350		172	2503	2351		172	2851	2500	2505	172		2504	2336	172	2853	2528	1874				172		2486	2663		172	2937	2640	1921	172		2554	2488
173	2800	2477	2350		173	2503	2351		173	2851	2500	2505	173		2504	2336	173	2853	2528	1874				173		2486	2663		173	2937	2640	1921	173		2554	2488
174	2800	2477	2350		174	2503	2351		174	2851	2500	2505	174		2504	2336	174	2853	2528	1874				174		2486	2663		174	2937	2640	1921	174		2554	2488
175	2800	2477	2350		175	2503	2351		175	2851	2500	2505	175		2504	2336	175	2853	2528	1874				175		2486	2663		175	2937	2625	1921	175		2554	2488
176	2800	2477	2350		176	2503	2351		176	2851	2500	2505	176		2504	2336	176	2853	2528	1874				176		2486	2663		176	2937	2625	1921	176		2554	2488
177	2800	2477	2350		177	2503	2351		177	2851	2500	2505	177		2504	2336	177	2853	2528	1874				177		2486	2663		177	2937	2625	1921	177		2554	2488
178	2800	2477	2350		178	2503	2341		178	2851	2500	2505	178		2504	2336	178	2853	2528	1874				178		2486	2663		178	2937	2625	1921	178		2554	2488
179	2800	2477	2350		179	2503	2341		179	2851	2500	2505	179		2504	2336	179	2853	2528	1874				179		2486	2663		179	2937	2625	1921	179		2554	2488
180	2800	2477	2350		180	2503	2341		180	2851	2500	2505	180		2504	2336	180	2853	2528	1874				180		2486	2663		180	2937	2625	1919	180		2554	2488
181	2800	2477	2350		181	2503	2341		181	2851	2500	2505	181		2504	2321	181	2853	2528	1874				181		2486	2663		181	2889	2625	1919	181		2554	2488
182	2800	2477	2350		182	2503	2341		182	2851	2484	2505	182		2504	2321	182	2853	2528	1874				182		2486	2663		182	2889	2625	1919	182		2554	2488
183	2800	2477	2350		183	2470	2341		183	2851	2484	2505	183		2504	2321	183	2853	2528	1874				183		2486	2663		183	2868	2625	1919	183		2554	2488
184	2800	2477	2350		184	2470	2341		184	2851	2484	2505	184		2504	2321	184	2853	2528	1874				184		2486	2663		184	2868	2625	1919	184		2554	2488
185	2800	2477	2350		185	2470	2341		185	2851	2484	2505	185		2504	2321	185	2853	2528	1874				185		2486	2663		185	2868	2625	1919	185		2554	2488
186	2800	2477	2350		186	2470	2341		186	2851	2484	2505	186		2504	2321	186	2853	2528	1874				186		2486	2663		186	2868	2625	1919	186		2554	2488
187	2800	2477	2350		187	2470	2341		187	2851	2484	2505	187		2504	2321	187	2853	2528	1874				187		2486	2663		187	2868	2625	1919	187		2554	2488
188	2800	2477	2350		188	2470	2341		188	2851	2484	2498	188		2504	2321	188	2853	2528	1874				188		2486	2663		188	2868	2625	1919	188		2547	2488
189	2800	2477	2350		189	2470	2341		189	2851	2484	2498	189		2504	2321	189	2853	2528	1874				189		2486	2654		189	2868	2625	1919	189		2547	2488
190	2800	2477	2350		190	2470	2341		190	2851	2484	2498	190		2504	2321	190	2853	2528	1874				190		2486	2654		190	2868	2612	1919	190		2547	2488
191	2800	2477	2350		191	2470	2341		191	2851	2484	2498	191		2504	2321	191	2853	2528	1874				191		2486	2654		191	2868	2612	1919	191		2547	2488
192	2800	2477	2350		192	2470	2341		192	2851	2484	2498	192		2504	2321	192	2853	2528	1874				192		2486	2654		192	2868	2612	1919	192		2547	2488
193	2800	2477	2328		193	2470	2341		193	2851	2484	2498	193		2504	2321	193	2853	2528	1874				193		2486	2654		193	2868	2612	1919	193		2547	2488
194	2800	2477	2328		194	2470	2341		194	2851	2484	2498	194		2504	2321	194	2853	2528	1874				194		2486	2654		194	2868	2609	1919	194		2547	2488
195	2800	2477	2328		195	2470	2341		195	2851	2484	2498	195		2504	2321	195	2853	2528	1874				195		2486	2654		195	2868	2609	1919	195		2547	2488
196	2800	2477	2328		196	2470	2341		196	2851	2484	2498	196		2504	2321	196	2853	2528	1874				196		2486	2654		196	2868	2609	1919	196		2547	2488
197	2800	2477	2328		197	2470	2341		197	2851	2484	2498	197		2504	2321	197	2853	2528	1874				197		2486	2654		197	2868	2609	1919	197		2547	2488
198	2800	2477	2328		198	2470	2341		198	2851	2484	2498	198		2504	2321	198	2853	2528	1874				198		2486	2654		198	2868	2609	1919	198		2547	2488
199	2800	2477	2328		199	2470	2341		199	2851	2484	2498	199		2504	2321	199	2853	2528	1874				199		2486	2654		199	2868	2609	1919	199		2547	2488
200	2800	2477	2328		200	2470	2341		200	2851	2484	2498	200		2504	2321	200	2853	2528	1874				200		2486	2654		200	2868	2609	1919	200		2547	2488
201	2800	2477	2328		201	2470	2341		201	2851	2484	2498	201		2504	2321	201	2853	2528	1874				201		2486	2654		201	2868	2607	1919	201		2547	2488
202	2800	2477	2328		202	2470	2341		202	2851	2484	2498	202		2504	2321	202	2853	2528	1874				202		2486	2654		202	2868	2607	1919	202		2547	2488
203	2800	2477	2328		203	2470	2341		203	2851	2484	2498	203		2504	2321	203	2853	2528	1874				203		2486	2654		203	2868	2607	1919	203		2547	2488
204	2800	2477	2328		204	2470	2341		204	2851	2484	2498	204		2504	2321	204	2853	2528	1874				204		2486	2654		204	2868	2607	1919	204		2547	2488
205	2800	2477	2328		205	2470	2341		205	2851	2484	2498	205		2504	2321	205	2853	2528	1874				205		2486	2654		205	2868	2607	1919	205		2547	2488
206	2800	2477	2328		206	2470	2341		206	2851	2484	2498	206		2504	2321	206	2853	2528	1874				206		2486	2654		206	2868	2607	1919	206		2547	2488
207	2800	2477	2328		207	2470	2341		207	2851	2484	2498	207		2504	2321	207	2853	2528	1874				207		2486	2654		207	2816	2607	1919	207		2547	2488
208	2800	2477	2328		208	2470	2341		208	2851	2484	2498	208		2504	2321	208	2853	2528	1874				208		2486	2654		208	2816	2607	1910	208		2547	2488
209	2800	2477	2328		209	2470	2341		209	2851	2484	2498	209		2504	2321	209	2853	2528	1874				209		2486	2600		209	2816	2607	1910	209		2547	2488
210	2800	2477	2328		210	2470	2341		210	2851	2484	2498	210		2504	2321	210	2853	2528	1874				210		2486	2600		210	2816	2607	1910	210		2547	2488
211	2800	2477	2328		211	2470	2341		211	2851	2484	2487	211		2504	2321	211	2853	2528	1874				211		2486	2600		211	2816	2607	1910	211		2547	2488
212	2800	2477	2328		212	2470	2341		212	2851	2484	2487	212		2504	2321	212	2853	2528	1874				212		2486	2600		212	2816	2607	1910	212		2547	2488
213	2800	2477	2328		213	2470	2341		213	2851	2484	2487	213		2504	2321	213	2853	2528	1874				213		2486	2600		213	2816	2607	1910	213		2547	2488
214	2800	2477	2328		214	2470	2341		214	2851	2484	2487	214		2504	2321	214	2853	2528	1874				214		2486	2600		214	2816	2607	1910	214		2547	2488
215	2800	2477	2328		215	2470	2341		215	2851	2484	2487	215		2504	2321	215	2853	2528	1874				215		2486	2600		215	2816	2607	1910	215		2547	2488
216	2800	2477	2328		216	2470	2341		216	2851	2484	2487	216		2504	2321	216	2853	2528	1874				216		2486	2600		216	2816	2607	1910	216		2547	2488
217	2800	2477	2328		217	2470	2341		217	2851	2484	2487	217		2504	2321	217	2853	2528	1874				217		2486	2600		217	2816	2607	1910	217		2547	2488
218	2800	2477	2328		218	2470	2341		218	2851	2484	2487	218		2504	2321	218	2853	2528	1874				218		2486	2600		218	2816	2607	1910	218		2547	2488
219	2800	2477	2328		219	2470	2341		219	2851	2484	2487	219		2504	2321	219	2853	2528	1874				219		2486	2600		219	2816	2607	1910	219		2547	2488
220	2800	2477	2328		220	2470	2300		220	2851	2484	2487	220		2504	2321	220	2853	2528	1874				220		2486	2600		220	2816	2607	1910	220		2547	2488
221	2800	2477	2328		221	2470	2300		221	2851	2484	2487	221		2504	2321	221	2853	2528	1874				221		2486	2600		221	2816	2607	1910	221		2547	2488
222	2800	2477	2328		222	2470	2300		222	2851	2484	2487	222		2504	2321	222	2853	2528	1874				222		2486	2600		222	2816	2607	1910	222		2547	2488
223	2800	2477	2328		223	2470	2300		223	2851	2484	2487	223		2504	2321	223	2853	2528	1874				223		2486	2600		223	2816	2607	1910	223		2547	2488
224	2800	2477	2328		224	2470	2300		224	2851	2484	2487	224		2504	2321	224	2853	2528	1874				224		2486	2600		224	2816	2607	1910	224		2547	2488
225	2800	2477	2328		225	2470	2300		225	2851	2484	2487	225		2504	2321	225	2853	2528	1874				225		2486	2600		225	2816	2607	1910	225		2547	2488
226	2800	2477	2328		226	2470	2300		226	2851	2484	2487	226		2504	2321	226	2853	2528	1874				226		2486	2600		226	2816	2607	1910	226		2547	2488
227	2800	2477	2328		227	2470	2300		227	2851	2484	2487	227		2504	2321	227	2853	2528	1874				227		2486	2600		227	2816	2607	1910	227		2547	2488
228	2800	2477	2328		228	2470	2300		228	2851	2484	2487	228		2504	2321	228	2853	2528	1874				228		2486	2600		228	2816	2595	1910	228		2547	2488
229	2800	2477	2328		229	2470	2300		229	2851	2484	2487	229		2504	2321	229	2853	2528	1874				229		2486	2600		229	2816	2595	1910	229		2547	2488
230	2800	2477	2328		230	2470	2300		230	2851	2484	2487	230		2504	2321	230	2853	2528	1874				230		2486	2600		230	2816	2595	1910	230		2547	2488
231	2800	2477	2328		231	2470	2300		231	2851	2484	2487	231		2504	2321	231	2853	2528	1874				231		2486	2600		231	2816	2595	1910	231		2547	2435
232	2800	2477	2328		232	2470	2300		232	2851	2484	2487	232		2504	2321	232	2853	2528	1874				232		2486	2600		232	2816	2595	1910	232		2547	2435
233	2800	2477	2328		233	2470	2300		233	2851	2484	2487	233		2504	2321	233	2853	2528	1874				233		2486	2600		233	2816	2595	1910	233		2547	2435
234	2800	2477	2328		234	2470	2300		234	2851	2484	2487	234		2504	2321	234	2853	2528	1874				234		2486	2600		234	2816	2595	1910	234		2547	2435
235	2800	2477	2328		235	2470	2300		235	2851	2484	2487	235		2504	2321	235	2853	2520	1874				235		2486	2600		235	2816	2595	1910	235		2547	2435
236	2800	2477	2328		236	2470	2300		236	2851	2484	2487	236		2504	2321	236	2853	2520	1874				236		2486	2600		236	2816	2595	1910	236		2547	2435
237	2800	2477	2328		237	2470	2300		237	2851	2484	2487	237		2504	2321	237	2853	2520	1874				237		2486	2600		237	2816	2595	1910	237		2547	2435
238	2800	2477	2328		238	2470	2300		238	2851	2484	2487	238		2504	2321	238	2804	2520	1874				238		2486	2600		238	2816	2595	1910	238		2547	2435
239	2800	2477	2328		239	2470	2300		239	2851	2484	2487	239		2504	2321	239	2804	2520	1874				239		2486	2600		239	2816	2595	1910	239		2547	2435
240	2800	2477	2323		240	2470	2300		240	2851	2484	2487	240		2504	2321	240	2804	2511	1874				240		2486	2600		240	2816	2595	1910	240		2547	2435
241	2800	2477	2323		241	2470	2300		241	2851	2484	2487	241		2504	2321	241	2804	2511	1874				241		2486	2600		241	2816	2595	1910	241		2547	2435
242	2800	2477	2323		242	2470	2300		242	2851	2484	2487	242		2504	2321	242	2804	2511	1874				242		2486	2600		242	2816	2595	1910	242		2547	2435
243	2800	2477	2323		243	2470	2300		243	2851	2484	2487	243		2504	2321	243	2804	2511	1874				243		2486	2600		243	2816	2595	1910	243		2547	2435
244	2800	2477	2323		244	2470	2300		244	2851	2484	2487	244		2504	2321	244	2804	2511	1874				244		2486	2600		244	2816	2589	1910	244		2547	2435
245	2800	2477	2323		245	2470	2300		245	2851	2484	2487	245		2504	2321	245	2804	2511	1874				245		2486	2600		245	2816	2589	1910	245		2547	2435
246	2800	2477	2323		246	2470	2300		246	2851	2484	2487	246		2504	2321	246	2804	2511	1874				246		2486	2600		246	2816	2589	1910	246		2547	2435
247	2800	2477	2323		247	2470	2300		247	2851	2484	2487	247		2504	2321	247	2804	2511	1874				247		2486	2600		247	2816	2589	1910	247		2547	2435
248	2800	2477	2323		248	2470	2300		248	2851	2484	2487	248		2504	2296	248	2804	2511	1874				248		2486	2600		248	2816	2589	1910	248		2547	2435
249	2800	2477	2323		249	2470	2300		249	2851	2484	2487	249		2504	2296	249	2804	2511	1874				249		2486	2600		249	2816	2589	1910	249		2547	2435
250	2800	2477	2323		250	2470	2300		250	2851	2484	2487	250		2504	2296	250	2804	2511	1874				250		2486	2600		250	2816	2589	1910	250		2547	2435
251	2800	2477	2323		251	2470	2300		251	2851	2484	2487	251		2504	2296	251	2804	2511	1874				251		2486	2600		251	2816	2589	1910	251		2547	2435
252	2800	2477	2323		252	2470	2300		252	2851	2484	2487	252		2504	2296	252	2804	2511	1874				252		2486	2600		252	2816	2589	1910	252		2547	2435
253	2800	2477	2323		253	2470	2300		253	2851	2484	2487	253		2504	2296	253	2804	2511	1874				253		2486	2600		253	2816	2589	1910	253		2547	2435
254	2800	2477	2323		254	2466	2300		254	2851	2484	2487	254		2504	2296	254	2804	2511	1874				254		2486	2558		254	2816	2562	1910	254		2547	2435
255	2800	2477	2323		255	2466	2300		255	2851	2484	2487	255		2504	2296	255	2804	2511	1874				255		2486	2558		255	2816	2562	1910	255		2547	2435
256	2800	2477	2323		256	2466	2300		256	2851	2484	2487	256		2504	2296	256	2804	2511	1874				256		2486	2558		256	2816	2562	1910	256		2547	2435
257	2800	2477	2323		257	2466	2300		257	2851	2484	2487	257		2504	2296	257	2804	2511	1874				257		2486	2558		257	2816	2562	1908	257		2547	2435
258	2800	2477	2323		258	2466	2300		258	2851	2484	2487	258		2504	2296	258	2804	2496	1874				258		2486	2558		258	2816	2562	1908	258		2547	2435
259	2800	2477	2323		259	2466	2300		259	2851	2484	2487	259		2504	2296	259	2804	2496	1874				259		2486	2558		259	2816	2562	1908	259		2547	2435
260	2800	2477	2323		260	2466	2300		260	2851	2484	2456	260		2504	2296	260	2804	2496	1874				260		2486	2558		260	2816	2562	1908	260		2547	2435
261	2800	2477	2323		261	2466	2300		261	2851	2484	2456	261		2504	2296	261	2804	2496	1874				261		2486	2558		261	2816	2562	1908	261		2547	2435
262	2800	2477	2323		262	2466	2300		262	2851	2484	2456	262		2504	2296	262	2804	2496	1874				262		2486	2518		262	2816	2562	1908	262		2547	2435
263	2800	2477	2323		263	2466	2300		263	2851	2484	2456	263		2504	2296	263	2804	2496	1874				263		2486	2518		263	2816	2562	1908	263		2547	2435
264	2800	2477	2323		264	2466	2300		264	2851	2484	2456	264		2504	2296	264	2804	2496	1874				264		2486	2518		264	2816	2562	1908	264		2547	2435
265	2800	2477	2323		265	2466	2300		265	2841	2484	2456	265		2504	2296	265	2804	2496	1874				265		2486	2518		265	2816	2562	1908	265		2547	2435
266	2800	2477	2323		266	2466	2300		266	2814	2484	2456	266		2504	2296	266	2804	2496	1874				266		2486	2518		266	2816	2562	1908	266		2547	2435
267	2800	2477	2323		267	2466	2300		267	2814	2484	2456	267		2504	2296	267	2804	2496	1874				267		2486	2518		267	2816	2541	1908	267		2547	2435
268	2800	2477	2323		268	2466	2300		268	2814	2484	2456	268		2504	2296	268	2804	2496	1874				268		2486	2518		268	2816	2541	1908	268		2547	2435
269	2800	2477	2323		269	2466	2300		269	2814	2484	2456	269		2504	2296	269	2804	2496	1874				269		2486	2518		269	2816	2541	1908	269		2547	2435
270	2800	2477	2323		270	2466	2300		270	2814	2484	2456	270		2504	2296	270	2804	2496	1874				270		2486	2518		270	2816	2541	1900	270		2547	2435
271	2800	2477	2323		271	2466	2300		271	2814	2484	2456	271		2504	2296	271	2804	2496	1874				271		2486	2518		271	2816	2541	1900	271		2547	2435
272	2800	2477	2323		272	2466	2300		272	2814	2484	2456	272		2504	2296	272	2804	2474	1874				272		2486	2518		272	2816	2541	1900	272		2547	2435
273	2800	2477	2323		273	2466	2300		273	2814	2484	2456	273		2504	2296	273	2804	2474	1874				273		2486	2518		273	2816	2541	1900	273		2547	2435
274	2800	2477	2323		274	2466	2300		274	2814	2484	2456	274		2504	2296	274	2804	2474	1874				274		2486	2518		274	2816	2541	1900	274		2547	2435
275	2800	2477	2323		275	2466	2300		275	2814	2484	2456	275		2504	2296	275	2804	2474	1874				275		2486	2510		275	2816	2541	1900	275		2547	2435
276	2800	2477	2323		276	2466	2300		276	2814	2484	2456	276		2504	2296	276	2804	2474	1874				276		2486	2510		276	2816	2541	1900	276		2539	2435
277	2800	2477	2323		277	2466	2300		277	2814	2484	2456	277		2504	2296	277	2804	2474	1874				277		2486	2510		277	2816	2541	1900	277		2539	2435
278	2800	2477	2323		278	2466	2300		278	2814	2484	2456	278		2504	2296	278	2804	2474	1874				278		2486	2510		278	2816	2541	1900	278		2539	2435
279	2800	2477	2323		279	2466	2300		279	2814	2484	2456	279		2504	2296	279	2804	2474	1874				279		2486	2510		279	2816	2541	1900	279		2539	2435
280	2800	2477	2323		280	2466	2300		280	2814	2484	2456	280		2504	2296	280	2804	2474	1874				280		2486	2510		280	2816	2541	1900	280		2535	2435
281	2800	2477	2314		281	2466	2300		281	2814	2484	2456	281		2504	2296	281	2804	2474	1874				281		2486	2510		281	2816	2541	1900	281		2535	2435
282	2800	2477	2314		282	2466	2300		282	2814	2484	2456	282		2504	2296	282	2804	2474	1874				282		2486	2510		282	2816	2541	1900	282		2535	2435
283	2800	2477	2314		283	2466	2300		283	2814	2484	2456	283		2504	2296	283	2804	2474	1874				283		2486	2510		283	2816	2541	1900	283		2535	2435
284	2800	2477	2314		284	2466	2300		284	2814	2484	2456	284		2504	2296	284	2804	2474	1874				284		2486	2510		284	2816	2541	1900	284		2535	2435
285	2800	2477	2314		285	2466	2300		285	2814	2484	2456	285		2504	2296	285	2804	2474	1874				285		2486	2510		285	2816	2541	1900	285		2535	2435
286	2800	2477	2314		286	2466	2300		286	2814	2484	2456	286		2504	2296	286	2804	2474	1874				286		2486	2510		286	2816	2541	1888	286		2535	2435
287	2800	2477	2314		287	2466	2300		287	2814	2484	2456	287		2504	2296	287	2804	2474	1874				287		2486	2510		287	2816	2541	1888	287		2535	2435
288	2800	2477	2314		288	2466	2300		288	2814	2484	2456	288		2504	2296	288	2804	2474	1874				288		2486	2510		288	2816	2541	1888	288		2535	2435
289	2800	2477	2314		289	2466	2300		289	2814	2484	2456	289		2497	2296	289	2804	2474	1874				289		2486	2510		289	2816	2541	1888	289		2535	2435
290	2800	2477	2314		290	2466	2300		290	2814	2484	2456	290		2497	2296	290	2804	2474	1874				290		2486	2510		290	2816	2541	1888	290		2535	2435
291	2800	2477	2314		291	2466	2300		291	2814	2484	2456	291		2497	2296	291	2804	2474	1874				291		2486	2510		291	2816	2541	1888	291		2535	2435
292	2800	2477	2314		292	2466	2300		292	2814	2484	2456	292		2497	2296	292	2804	2474	1874				292		2486	2510		292	2816	2541	1888	292		2535	2435
293	2800	2477	2314		293	2466	2300		293	2814	2484	2456	293		2497	2296	293	2804	2474	1874				293		2486	2510		293	2816	2541	1888	293		2535	2435
294	2800	2477	2314		294	2466	2300		294	2814	2484	2456	294		2497	2296	294	2804	2474	1874				294		2486	2510		294	2816	2541	1888	294		2535	2435
295	2800	2477	2314		295	2466	2300		295	2814	2484	2456	295		2497	2296	295	2804	2474	1874				295		2486	2510		295	2816	2541	1888	295		2535	2435
296	2800	2477	2314		296	2466	2296		296	2814	2484	2456	296		2497	2296	296	2804	2474	1874				296		2486	2510		296	2816	2541	1888	296		2535	2435
297	2800	2477	2314		297	2466	2296		297	2814	2484	2456	297		2497	2296	297	2804	2474	1874				297		2486	2510		297	2816	2541	1888	297		2535	2435
298	2800	2477	2314		298	2466	2296		298	2814	2484	2456	298		2497	2296	298	2776	2474	1874				298		2486	2510		298	2816	2541	1888	298		2535	2435
299	2800	2477	2314		299	2466	2296		299	2814	2484	2456	299		2497	2296	299	2776	2474	1874				299		2486	2510		299	2816	2541	1888	299		2535	2435
300	2800	2477	2314		300	2466	2296		300	2814	2484	2456	300		2497	2296	300	2776	2474	1874				300		2486	2510		300	2816	2541	1888	300		2535	2435
301	2800	2477	2314		301	2466	2296		301	2814	2484	2456	301		2497	2296	301	2776	2474	1874				301		2486	2510		301	2816	2541	1888	301		2535	2435
302	2800	2477	2314		302	2466	2296		302	2814	2484	2456	302		2497	2296	302	2776	2474	1874				302		2486	2510		302	2816	2541	1888	302		2535	2435
303	2800	2477	2314		303	2466	2296		303	2814	2484	2456	303		2497	2296	303	2776	2474	1874				303		2486	2510		303	2816	2541	1888	303		2535	2435
304	2800	2477	2314		304	2466	2296		304	2814	2484	2456	304		2497	2296	304	2776	2474	1874				304		2486	2510		304	2816	2541	1888	304		2535	2435
305	2800	2477	2314		305	2466	2296		305	2814	2484	2456	305		2497	2296	305	2776	2474	1874				305		2486	2510		305	2816	2541	1888	305		2535	2435
306	2800	2477	2314		306	2466	2296		306	2814	2484	2456	306		2497	2296	306	2776	2474	1874				306		2486	2510		306	2816	2541	1888	306		2535	2435
307	2761	2477	2314		307	2466	2296		307	2814	2484	2456	307		2497	2296	307	2776	2474	1874				307		2486	2510		307	2816	2541	1888	307		2535	2435
308	2761	2477	2293		308	2466	2296		308	2814	2484	2456	308		2497	2296	308	2776	2474	1874				308		2486	2498		308	2816	2541	1888	308		2535	2435
309	2761	2477	2293		309	2466	2296		309	2814	2484	2456	309		2481	2296	309	2776	2474	1874				309		2486	2498		309	2816	2541	1888	309		2535	2435
310	2761	2477	2293		310	2466	2296		310	2814	2484	2446	310		2481	2296	310	2776	2474	1874				310		2486	2498		310	2816	2541	1888	310		2535	2435
311	2761	2477	2293		311	2466	2275		311	2814	2484	2446	311		2481	2296	311	2776	2474	1874				311		2486	2498		311	2816	2541	1888	311		2535	2435
312	2761	2477	2293		312	2466	2275		312	2814	2484	2446	312		2481	2296	312	2776	2474	1874				312		2486	2498		312	2816	2541	1888	312		2535	2435
313	2761	2477	2293		313	2466	2275		313	2814	2484	2446	313		2481	2296	313	2776	2474	1874				313		2486	2498		313	2816	2541	1888	313		2535	2435
314	2761	2477	2293		314	2466	2275		314	2814	2484	2446	314		2481	2296	314	2776	2474	1874				314		2486	2498		314	2816	2541	1888	314		2535	2435
315	2761	2477	2293		315	2466	2275		315	2812	2484	2446	315		2481	2296	315	2776	2474	1874				315		2486	2498		315	2816	2541	1888	315		2535	2435
316	2761	2477	2293		316	2466	2275		316	2812	2484	2446	316		2481	2296	316	2776	2474	1874				316		2486	2498		316	2816	2541	1888	316		2535	2435
317	2761	2477	2293		317	2466	2275		317	2812	2484	2446	317		2481	2296	317	2776	2474	1874				317		2486	2498		317	2816	2541	1877	317		2535	2435
318	2761	2477	2293		318	2466	2275		318	2812	2484	2446	318		2481	2296	318	2776	2474	1874				318		2486	2498		318	2816	2541	1877	318		2535	2435
319	2761	2477	2293		319	2466	2275		319	2812	2484	2446	319		2481	2296	319	2776	2474	1874				319		2486	2498		319	2816	2541	1877	319		2535	2435
320	2761	2477	2293		320	2466	2275		320	2812	2484	2446	320		2481	2296	320	2776	2474	1874				320		2486	2498		320	2816	2541	1877	320		2535	2435
321	2761	2477	2293		321	2466	2275		321	2812	2484	2446	321		2475	2296	321	2776	2474	1874				321		2486	2498		321	2816	2541	1877	321		2535	2435
322	2761	2477	2283		322	2466	2275		322	2812	2484	2446	322		2475	2296	322	2776	2474	1874				322		2486	2498		322	2816	2541	1877	322		2535	2435
323	2761	2477	2283		323	2466	2275		323	2812	2484	2446	323		2475	2296	323	2776	2474	1874				323		2486	2498		323	2816	2541	1877	323		2535	2435
324	2761	2477	2283		324	2466	2275		324	2812	2484	2446	324		2475	2296	324	2776	2474	1874				324		2486	2498		324	2816	2541	1877	324		2535	2435
325	2761	2477	2283		325	2466	2275		325	2812	2484	2446	325		2475	2296	325	2776	2474	1874				325		2486	2498		325	2816	2541	1877	325		2535	2435
326	2761	2477	2283		326	2466	2275		326	2812	2484	2446	326		2475	2296	326	2776	2474	1874				326		2486	2497		326	2816	2541	1877	326		2535	2435
327	2761	2477	2283		327	2466	2275		327	2812	2484	2446	327		2475	2296	327	2776	2474	1874				327		2486	2497		327	2816	2541	1877	327		2535	2435
328	2761	2477	2283		328	2466	2275		328	2812	2484	2446	328		2475	2296	328	2776	2474	1874				328		2486	2497		328	2816	2541	1877	328		2535	2424
329	2761	2477	2283		329	2466	2275		329	2812	2484	2446	329		2475	2296	329	2776	2474	1874				329		2486	2497		329	2816	2541	1877	329		2535	2424
330	2761	2477	2283		330	2466	2275		330	2812	2484	2446	330		2475	2296	330	2776	2474	1874				330		2486	2497		330	2816	2541	1877	330		2535	2424
331	2761	2477	2283		331	2466	2275		331	2812	2484	2446	331		2475	2296	331	2776	2474	1874				331		2486	2497		331	2816	2541	1877	331		2535	2424
332	2761	2477	2283		332	2466	2275		332	2812	2484	2446	332		2475	2296	332	2776	2474	1874				332		2486	2497		332	2816	2541	1877	332		2535	2424
333	2761	2477	2283		333	2466	2275		333	2812	2484	2446	333		2475	2296	333	2776	2474	1874				333		2486	2497		333	2816	2541	1877	333		2535	2424
334	2761	2477	2283		334	2466	2275		334	2812	2484	2446	334		2475	2296	334	2776	2474	1874				334		2486	2497		334	2816	2541	1877	334		2535	2424
335	2761	2477	2283		335	2466	2275		335	2812	2484	2446	335		2475	2296	335	2776	2474	1874				335		2486	2492		335	2816	2541	1877	335		2535	2424
336	2761	2477	2283		336	2466	2275		336	2812	2484	2446	336		2475	2296	336	2776	2474	1874				336		2486	2492		336	2816	2541	1877	336		2535	2424
337	2761	2477	2283		337	2466	2275		337	2812	2484	2446	337		2475	2296	337	2776	2474	1874				337		2486	2492		337	2816	2541	1877	337		2535	2424
338	2761	2477	2283		338	2466	2275		338	2812	2484	2446	338		2475	2296	338	2776	2474	1874				338		2486	2492		338	2816	2541	1877	338		2535	2424
339	2761	2477	2283		339	2466	2275		339	2812	2484	2446	339		2475	2296	339	2776	2474	1874				339		2486	2492		339	2816	2541	1877	339		2535	2424
340	2761	2477	2283		340	2466	2275		340	2812	2484	2446	340		2475	2296	340	2776	2474	1874				340		2486	2492		340	2816	2541	1877	340		2535	2424
341	2761	2477	2258		341	2466	2275		341	2812	2484	2446	341		2475	2296	341	2776	2474	1874				341		2486	2489		341	2816	2541	1877	341		2535	2424
342	2761	2477	2258		342	2466	2275		342	2812	2484	2446	342		2475	2296	342	2776	2474	1874				342		2486	2455		342	2816	2541	1877	342		2535	2424
343	2761	2477	2258		343	2466	2275		343	2812	2484	2446	343		2475	2296	343	2776	2474	1874				343		2486	2455		343	2816	2541	1877	343		2535	2424
344	2761	2477	2258		344	2466	2275		344	2812	2484	2446	344		2475	2296	344	2776	2474	1874				344		2486	2455		344	2816	2541	1877	344		2535	2424
345	2761	2477	2258		345	2466	2275		345	2812	2484	2446	345		2475	2296	345	2776	2474	1874				345		2486	2455		345	2816	2541	1877	345		2535	2424
346	2761	2477	2258		346	2466	2275		346	2812	2484	2446	346		2475	2296	346	2776	2474	1874				346		2486	2455		346	2816	2541	1874	346		2535	2424
347	2761	2477	2258		347	2466	2275		347	2812	2484	2446	347		2475	2296	347	2776	2474	1874				347		2486	2455		347	2816	2541	1874	347		2535	2424
348	2761	2477	2258		348	2466	2275		348	2812	2484	2446	348		2475	2296	348	2776	2474	1874				348		2486	2455		348	2816	2541	1874	348		2535	2424
349	2761	2477	2258		349	2466	2275		349	2788	2484	2446	349		2475	2296	349	2776	2474	1874				349		2486	2454		349	2816	2541	1874	349		2535	2424
350	2761	2477	2246		350	2466	2275		350	2788	2484	2446	350		2475	2296	350	2776	2474	1874				350		2486	2454		350	2816	2541	1855	350		2535	2424
351	2761	2477	2246		351	2466	2275		351	2788	2484	2446	351		2475	2296	351	2776	2474	1874				351		2486	2454		351	2816	2541	1855	351		2535	2424
352	2761	2477	2246		352	2466	2275		352	2788	2484	2446	352		2475	2296	352	2776	2474	1874				352		2486	2454		352	2816	2541	1855	352		2499	2424
353	2761	2477	2246		353	2466	2275		353	2788	2484	2446	353		2475	2296	353	2776	2474	1874				353		2486	2454		353	2816	2541	1855	353		2499	2424
354	2761	2477	2246		354	2466	2275		354	2788	2484	2446	354		2475	2296	354	2776	2474	1874				354		2486	2454		354	2816	2541	1855	354		2499	2424
355	2761	2477	2246		355	2466	2275		355	2788	2484	2446	355		2475	2296	355	2776	2474	1874				355		2486	2454		355	2816	2534	1855	355		2499	2424
356	2761	2477	2246		356	2466	2275		356	2788	2484	2446	356		2475	2296	356	2776	2474	1874				356		2486	2454		356	2816	2534	1855	356		2499	2424
357	2761	2477	2246		357	2466	2275		357	2788	2484	2446	357		2475	2296	357	2776	2474	1874				357		2486	2454		357	2816	2534	1855	357		2499	2424
358	2761	2477	2246		358	2466	2275		358	2788	2484	2446	358		2475	2296	358	2776	2474	1874				358		2486	2454		358	2816	2534	1855	358		2499	2424
359	2761	2477	2246		359	2466	2275		359	2788	2484	2446	359		2475	2296	359	2776	2474	1874				359		2486	2454		359	2816	2534	1855	359		2499	2424
360	2761	2477	2246		360	2466	2275		360	2788	2484	2446	360		2475	2296	360	2776	2474	1874				360		2486	2454		360	2816	2534	1855	360		2499	2424
361	2761	2477	2246		361	2466	2275		361	2788	2484	2446	361		2475	2296	361	2776	2474	1874				361		2486	2454		361	2816	2534	1855	361		2499	2424
362	2761	2477	2246		362	2466	2275		362	2788	2473	2446	362		2475	2296	362	2776	2474	1874				362		2486	2454		362	2816	2534	1855	362		2499	2424
363	2761	2477	2246		363	2466	2275		363	2788	2473	2446	363		2475	2296	363	2776	2474	1874				363		2486	2454		363	2816	2534	1855	363		2499	2424
364	2761	2477	2246		364	2466	2275		364	2788	2473	2446	364		2475	2296	364	2776	2474	1874				364		2486	2454		364	2816	2534	1855	364		2499	2424
365	2761	2477	2246		365	2466	2275		365	2788	2473	2446	365		2475	2296	365	2776	2474	1874				365		2486	2454		365	2816	2534	1855	365		2499	2424
366	2761	2477	2246		366	2466	2275		366	2788	2473	2446	366		2475	2296	366	2776	2474	1874				366		2486	2453		366	2749	2534	1855	366		2499	2424
367	2761	2477	2246		367	2466	2275		367	2788	2473	2446	367		2475	2296	367	2776	2474	1874				367		2486	2453		367	2749	2534	1855	367		2499	2424
368	2761	2477	2246		368	2466	2275		368	2788	2473	2446	368		2475	2296	368	2776	2474	1874				368		2486	2453		368	2749	2534	1855	368		2499	2424
369	2761	2477	2246		369	2466	2275		369	2788	2473	2446	369		2475	2296	369	2776	2474	1874				369		2486	2453		369	2749	2534	1855	369		2499	2424
370	2761	2477	2246		370	2466	2275		370	2788	2473	2446	370		2475	2296	370	2776	2474	1874				370		2486	2453		370	2749	2534	1855	370		2499	2424
371	2761	2477	2246		371	2466	2275		371	2788	2473	2446	371		2475	2271	371	2776	2474	1874				371		2486	2453		371	2749	2534	1855	371		2499	2424
372	2761	2477	2246		372	2466	2275		372	2788	2473	2446	372		2475	2271	372	2776	2474	1874				372		2486	2453		372	2749	2534	1855	372		2499	2424
373	2689	2477	2246		373	2466	2275		373	2788	2473	2446	373		2475	2271	373	2776	2474	1874				373		2486	2453		373	2749	2534	1855	373		2499	2424
374	2689	2477	2246		374	2466	2275		374	2788	2473	2446	374		2475	2271	374	2776	2474	1874				374		2486	2453		374	2749	2534	1855	374		2499	2424
375	2689	2477	2246		375	2466	2275		375	2788	2473	2446	375		2475	2271	375	2776	2474	1874				375		2486	2453		375	2749	2534	1855	375		2499	2424
376	2689	2477	2246		376	2466	2275		376	2788	2473	2446	376		2475	2271	376	2776	2474	1874				376		2486	2453		376	2749	2534	1855	376		2499	2424
377	2689	2477	2246		377	2466	2275		377	2788	2473	2446	377		2475	2271	377	2776	2474	1874				377		2486	2453		377	2749	2534	1855	377		2499	2424
378	2689	2477	2246		378	2466	2275		378	2788	2473	2446	378		2475	2271	378	2776	2474	1874				378		2486	2453		378	2749	2534	1855	378		2499	2424
379	2689	2477	2246		379	2466	2275		379	2788	2473	2446	379		2475	2271	379	2776	2474	1874				379		2486	2453		379	2749	2534	1855	379		2499	2424
380	2689	2477	2246		380	2466	2275		380	2788	2473	2446	380		2475	2271	380	2776	2474	1874				380		2486	2453		380	2749	2518	1855	380		2499	2424
381	2689	2477	2246		381	2466	2275		381	2788	2473	2446	381		2475	2271	381	2776	2474	1874				381		2486	2453		381	2749	2518	1855	381		2499	2424
382	2689	2477	2246		382	2466	2275		382	2788	2473	2446	382		2475	2271	382	2776	2474	1874				382		2486	2453		382	2749	2518	1855	382		2499	2424
383	2689	2477	2246		383	2466	2275		383	2788	2473	2446	383		2475	2271	383	2776	2474	1874				383		2486	2453		383	2749	2518	1855	383		2499	2424
384	2689	2477	2246		384	2466	2275		384	2788	2473	2446	384		2475	2271	384	2776	2474	1874				384		2486	2453		384	2749	2518	1855	384		2499	2424
385	2689	2477	2246		385	2466	2275		385	2788	2473	2446	385		2475	2271	385	2776	2474	1874				385		2486	2453		385	2749	2518	1855	385		2499	2424
386	2689	2477	2246		386	2466	2275		386	2788	2473	2446	386		2475	2271	386	2776	2474	1874				386		2486	2453		386	2749	2518	1855	386		2499	2424
387	2689	2477	2246		387	2398	2275		387	2788	2473	2446	387		2475	2271	387	2776	2474	1874				387		2486	2453		387	2749	2518	1855	387		2499	2424
388	2689	2477	2246		388	2398	2275		388	2788	2473	2446	388		2475	2271	388	2776	2474	1874				388		2486	2453		388	2749	2518	1855	388		2499	2421
389	2689	2477	2246		389	2398	2275		389	2788	2473	2446	389		2475	2271	389	2776	2474	1874				389		2486	2453		389	2749	2518	1855	389		2499	2421
390	2689	2477	2246		390	2398	2275		390	2788	2473	2446	390		2475	2271	390	2776	2474	1874				390		2486	2453		390	2749	2518	1855	390		2499	2421
391	2689	2477	2246		391	2398	2275		391	2788	2473	2446	391		2475	2271	391	2776	2474	1874				391		2486	2416		391	2749	2518	1855	391		2499	2421
392	2689	2477	2246		392	2398	2275		392	2788	2473	2446	392		2475	2271	392	2776	2474	1874				392		2486	2416		392	2749	2518	1855	392		2499	2421
393	2689	2477	2234		393	2398	2275		393	2788	2473	2446	393		2475	2271	393	2776	2474	1874				393		2486	2416		393	2749	2518	1855	393		2499	2421
394	2689	2477	2234		394	2398	2275		394	2788	2473	2446	394		2475	2271	394	2776	2474	1874				394		2486	2416		394	2749	2518	1855	394		2499	2421
395	2689	2477	2234		395	2398	2275		395	2788	2473	2446	395		2475	2271	395	2776	2474	1874				395		2486	2416		395	2749	2518	1855	395		2499	2421
396	2689	2477	2234		396	2398	2275		396	2788	2473	2446	396		2475	2271	396	2776	2474	1874				396		2486	2416		396	2749	2518	1855	396		2499	2421
397	2689	2477	2234		397	2398	2275		397	2788	2473	2446	397		2475	2271	397	2776	2474	1874				397		2486	2416		397	2749	2518	1855	397		2499	2421
398	2689	2477	2230		398	2398	2275		398	2788	2473	2446	398		2475	2271	398	2776	2474	1874				398		2486	2416		398	2749	2518	1855	398		2499	2421
399	2689	2477	2230		399	2398	2275		399	2788	2473	2446	399		2475	2271	399	2776	2474	1874				399		2486	2416		399	2749	2518	1855	399		2499	2421
400	2689	2477	2230		400	2398	2275		400	2788	2473	2446	400		2475	2271	400	2776	2474	1874				400		2486	2416		400	2749	2518	1855	400		2499	2421
401	2689	2477	2230		401	2398	2275		401	2788	2473	2446	401		2475	2271	401	2776	2474	1874				401		2486	2416		401	2749	2518	1855	401		2499	2421
402	2689	2477	2230		402	2398	2275		402	2788	2473	2446	402		2475	2271	402	2776	2474	1874				402		2486	2416		402	2749	2518	1855	402		2499	2421
403	2689	2477	2230		403	2398	2275		403	2788	2473	2445	403		2475	2271	403	2776	2474	1874				403		2486	2416		403	2749	2518	1855	403		2499	2421
404	2689	2477	2230		404	2398	2275		404	2788	2473	2445	404		2475	2271	404	2776	2474	1874				404		2486	2416		404	2749	2518	1855	404		2499	2421
405	2689	2477	2230		405	2398	2275		405	2788	2468	2445	405		2475	2271	405	2776	2474	1874				405		2486	2415		405	2749	2518	1855	405		2499	2421
406	2689	2477	2230		406	2398	2275		406	2788	2468	2445	406		2475	2271	406	2776	2474	1874				406		2486	2415		406	2749	2518	1855	406		2499	2421
407	2689	2477	2230		407	2398	2275		407	2788	2468	2445	407		2475	2271	407	2776	2474	1874				407		2486	2415		407	2749	2518	1855	407		2499	2421
408	2689	2477	2230		408	2398	2275		408	2788	2467	2445	408		2475	2271	408	2776	2474	1874				408		2486	2415		408	2749	2518	1855	408		2499	2385
409	2689	2477	2230		409	2398	2275		409	2788	2467	2445	409		2475	2271	409	2776	2474	1874				409		2486	2415		409	2749	2518	1855	409		2499	2385
410	2689	2477	2230		410	2398	2268		410	2788	2467	2445	410		2475	2271	410	2776	2474	1874				410		2486	2415		410	2749	2518	1855	410		2499	2385
411	2689	2477	2230		411	2398	2268		411	2788	2467	2445	411		2475	2271	411	2776	2474	1874				411		2486	2415		411	2749	2518	1855	411		2499	2385
412	2689	2477	2230		412	2398	2268		412	2788	2467	2445	412		2475	2271	412	2776	2474	1874				412		2486	2415		412	2749	2518	1855	412		2499	2385
413	2689	2477	2230		413	2398	2268		413	2788	2467	2445	413		2475	2271	413	2776	2474	1874				413		2486	2415		413	2749	2518	1855	413		2499	2385
414	2689	2477	2230		414	2398	2268		414	2788	2467	2445	414		2475	2271	414	2776	2474	1874				414		2486	2415		414	2749	2518	1855	414		2499	2385
415	2689	2477	2230		415	2398	2268		415	2788	2467	2445	415		2475	2271	415	2776	2474	1874				415		2486	2415		415	2749	2518	1855	415		2499	2385
416	2689	2477	2230		416	2398	2268		416	2788	2467	2445	416		2475	2271	416	2776	2474	1854				416		2486	2415		416	2749	2518	1855	416		2499	2385
417	2689	2477	2230		417	2398	2268		417	2788	2467	2445	417		2475	2271	417	2776	2474	1854				417		2486	2415		417	2749	2518	1855	417		2499	2385
418	2689	2477	2230		418	2398	2268		418	2788	2467	2445	418		2475	2271	418	2776	2474	1854				418		2486	2415		418	2749	2518	1850	418		2499	2385
419	2689	2477	2230		419	2398	2268		419	2788	2467	2445	419		2475	2271	419	2776	2474	1854				419		2486	2415		419	2749	2518	1850	419		2499	2385
420	2689	2477	2230		420	2398	2268		420	2788	2467	2445	420		2475	2271	420	2776	2474	1854				420		2486	2415		420	2749	2518	1850	420		2499	2385
421	2689	2477	2230		421	2398	2268		421	2788	2467	2439	421		2475	2271	421	2776	2474	1854				421		2486	2415		421	2749	2518	1850	421		2499	2385
422	2689	2477	2230		422	2398	2268		422	2788	2467	2439	422		2475	2271	422	2776	2474	1854				422		2486	2415		422	2749	2518	1850	422		2499	2385
423	2689	2477	2230		423	2398	2268		423	2788	2467	2430	423		2475	2271	423	2776	2474	1854				423		2486	2415		423	2749	2518	1850	423		2499	2385
424	2689	2477	2230		424	2398	2268		424	2788	2467	2430	424		2475	2271	424	2776	2474	1854				424		2486	2415		424	2749	2518	1850	424		2499	2385
425	2689	2477	2230		425	2398	2268		425	2788	2467	2430	425		2475	2271	425	2776	2474	1849				425		2486	2415		425	2749	2518	1850	425		2499	2385
426	2689	2477	2230		426	2398	2268		426	2788	2467	2430	426		2475	2271	426	2776	2474	1849				426		2486	2415		426	2749	2518	1850	426		2499	2385
427	2689	2477	2230		427	2398	2268		427	2788	2467	2421	427		2475	2271	427	2776	2474	1849				427		2486	2415		427	2749	2518	1850	427		2499	2385
428	2689	2477	2230		428	2398	2268		428	2788	2467	2421	428		2475	2271	428	2776	2474	1849				428		2486	2415		428	2749	2518	1850	428		2499	2385
429	2689	2477	2230		429	2398	2268		429	2788	2467	2421	429		2475	2271	429	2776	2474	1849				429		2486	2415		429	2749	2518	1850	429		2499	2385
430	2689	2477	2230		430	2398	2268		430	2788	2467	2421	430		2475	2271	430	2776	2474	1849				430		2486	2415		430	2749	2518	1850	430		2499	2385
431	2689	2477	2230		431	2398	2268		431	2788	2467	2421	431		2475	2246	431	2776	2474	1849				431		2486	2415		431	2749	2518	1850	431		2499	2385
432	2689	2477	2230		432	2398	2268		432	2788	2467	2421	432		2475	2246	432	2776	2474	1849				432		2486	2415		432	2749	2518	1850	432		2499	2385
433	2689	2477	2230		433	2398	2268		433	2788	2467	2421	433		2475	2246	433	2776	2474	1849				433		2486	2415		433	2749	2518	1850	433		2499	2385
434	2689	2477	2230		434	2398	2268		434	2788	2467	2421	434		2475	2246	434	2776	2474	1849				434		2486	2415		434	2749	2518	1850	434		2499	2385
435	2689	2477	2230		435	2398	2268		435	2788	2467	2421	435		2475	2246	435	2776	2474	1849				435		2486	2415		435	2749	2518	1850	435		2499	2385
436	2689	2477	2230		436	2398	2268		436	2788	2467	2421	436		2475	2246	436	2776	2474	1849				436		2486	2380		436	2749	2518	1850	436		2499	2385
437	2689	2477	2230		437	2398	2268		437	2788	2467	2421	437		2475	2246	437	2776	2474	1849				437		2486	2380		437	2749	2518	1850	437		2499	2385
438	2689	2477	2230		438	2398	2268		438	2788	2467	2421	438		2475	2246	438	2776	2474	1849				438		2486	2380		438	2749	2518	1850	438		2499	2385
439	2689	2477	2230		439	2398	2268		439	2788	2467	2421	439		2475	2246	439	2776	2474	1849				439		2486	2380		439	2749	2518	1850	439		2499	2385
440	2689	2477	2230		440	2398	2265		440	2788	2467	2421	440		2475	2246	440	2776	2474	1849				440		2486	2380		440	2749	2518	1817	440		2499	2385
441	2689	2477	2230		441	2398	2265		441	2788	2467	2421	441		2475	2246	441	2776	2474	1849				441		2486	2380		441	2749	2518	1817	441		2499	2385
442	2689	2477	2230		442	2398	2265		442	2788	2467	2421	442		2475	2246	442	2776	2474	1849				442		2486	2380		442	2749	2518	1817	442		2499	2385
443	2689	2477	2230		443	2398	2265		443	2788	2467	2421	443		2475	2246	443	2776	2474	1849				443		2486	2380		443	2749	2518	1817	443		2499	2385
444	2689	2477	2230		444	2398	2265		444	2788	2467	2421	444		2475	2246	444	2776	2474	1849				444		2486	2380		444	2749	2518	1817	444		2499	2385
445	2689	2477	2230		445	2398	2265		445	2788	2467	2421	445		2475	2246	445	2776	2474	1849				445		2486	2380		445	2749	2518	1817	445		2499	2385
446	2689	2477	2230		446	2398	2226		446	2788	2467	2421	446		2475	2246	446	2776	2474	1849				446		2486	2380		446	2749	2518	1817	446		2499	2385
447	2689	2477	2230		447	2398	2226		447	2788	2467	2421	447		2475	2246	447	2776	2474	1849				447		2486	2380		447	2749	2518	1817	447		2499	2385
448	2689	2477	2230		448	2398	2226		448	2788	2467	2421	448		2475	2246	448	2776	2474	1849				448		2486	2380		448	2749	2518	1817	448		2499	2385
449	2689	2477	2230		449	2398	2226		449	2788	2467	2421	449		2475	2246	449	2776	2474	1849				449		2486	2380		449	2749	2518	1817	449		2499	2385
450	2689	2477	2230		450	2398	2226		450	2788	2467	2421	450		2475	2246	450	2776	2474	1849				450		2486	2372		450	2749	2518	1817	450		2499	2385
451	2689	2477	2230		451	2398	2226		451	2788	2467	2421	451		2475	2246	451	2776	2474	1849				451		2486	2372		451	2749	2518	1817	451		2499	2385
452	2689	2477	2230		452	2398	2226		452	2788	2467	2421	452		2475	2246	452	2776	2474	1849				452		2486	2372		452	2749	2518	1817	452		2499	2385
453	2689	2477	2230		453	2398	2226		453	2788	2467	2421	453		2475	2246	453	2776	2474	1849				453		2486	2372		453	2749	2518	1817	453		2499	2385
454	2689	2477	2230		454	2398	2226		454	2788	2467	2421	454		2475	2246	454	2776	2474	1849				454		2486	2372		454	2749	2518	1817	454		2499	1865
455	2689	2477	2230		455	2398	2226		455	2788	2467	2406	455		2475	2246	455	2776	2474	1849				455		2486	2372		455	2749	2515	1817	455		2499	1865
456	2689	2477	2230		456	2398	2226		456	2788	2467	2406	456		2475	2246	456	2776	2474	1849				456		2486	2372		456	2749	2515	1817	456		2499	1865
457	2689	2477	2230		457	2398	2226		457	2788	2467	2406	457		2475	2246	457	2776	2474	1835				457		2486	2372		457	2749	2515	1817	457		2499	1865
458	2689	2477	2230		458	2398	2226		458	2788	2467	2406	458		2475	2246	458	2776	2474	1835				458		2486	2372		458	2749	2515	1817	458		2499	1865
459	2689	2477	2230		459	2398	2226		459	2788	2467	2406	459		2475	2246	459	2776	2474	1835				459		2486	2372		459	2749	2515	1817	459		2499	1865
460	2689	2477	2230		460	2398	2226		460	2788	2467	2406	460		2475	2246	460	2776	2474	1835				460		2486	2372		460	2749	2515	1817	460		2499	1865
461	2689	2477	2230		461	2398	2226		461	2788	2467	2406	461		2475	2246	461	2776	2474	1835				461		2486	2372		461	2749	2515	1817	461		2499	1865
462	2689	2477	2230		462	2398	2226		462	2788	2467	2406	462		2475	2246	462	2776	2474	1835				462		2486	2372		462	2749	2515	1817	462		2499	1865
463	2689	2477	2230		463	2398	2226		463	2788	2467	2406	463		2475	2246	463	2776	2474	1835				463		2486	2372		463	2749	2515	1817	463		2499	1865
464	2689	2477	2230		464	2398	2226		464	2788	2467	2406	464		2475	2246	464	2776	2474	1835				464		2486	2372		464	2749	2515	1817	464		2499	1865
465	2689	2477	2230		465	2398	2226		465	2788	2467	2401	465		2475	2246	465	2776	2474	1835				465		2486	2372		465	2749	2515	1817	465		2499	1865
466	2689	2477	2230		466	2398	2226		466	2788	2467	2401	466		2475	2246	466	2776	2474	1835				466		2486	2372		466	2749	2515	1817	466		2499	1865
467	2689	2477	2230		467	2398	2226		467	2788	2467	2401	467		2475	2246	467	2776	2474	1835				467		2486	2372		467	2749	2515	1817	467		2499	1865
468	2689	2477	2230		468	2398	2202		468	2788	2467	2401	468		2475	2246	468	2776	2474	1835				468		2486	2372		468	2749	2515	1817	468		2499	1865
469	2689	2477	2230		469	2398	2202		469	2788	2467	2401	469		2475	2246	469	2776	2474	1835				469		2486	2372		469	2749	2515	1817	469		2499	1865
470	2689	2477	2230		470	2398	2202		470	2788	2467	2401	470		2475	2246	470	2757	2474	1835				470		2486	2372		470	2749	2515	1817	470		2499	1865
471	2689	2477	2230		471	2398	2202		471	2788	2467	2401	471		2475	2246	471	2757	2474	1835				471		2486	2372		471	2749	2515	1817	471		2499	1865
472	2689	2477	2230		472	2398	2202		472	2788	2467	2401	472		2475	2246	472	2757	2474	1835				472		2486	2372		472	2749	2515	1817	472		2499	1865
473	2689	2477	2230		473	2398	2202		473	2788	2467	2401	473		2475	2246	473	2757	2474	1835				473		2486	2372		473	2749	2515	1817	473		2499	1865
474	2689	2477	2230		474	2398	2202		474	2788	2467	2401	474		2475	2246	474	2757	2474	1835				474		2486	2372		474	2749	2515	1817	474		2499	1865
475	2689	2477	2220		475	2398	2202		475	2788	2467	2401	475		2475	2246	475	2757	2474	1805				475		2486	2372		475	2749	2515	1817	475		2499	1865
476	2689	2477	2220		476	2398	2202		476	2788	2467	2401	476		2475	2246	476	2757	2474	1805				476		2486	2372		476	2749	2515	1817	476		2499	1865
477	2689	2477	2219		477	2398	2202		477	2788	2467	2401	477		2475	2246	477	2757	2474	1805				477		2486	2372		477	2749	2515	1817	477		2499	1865
478	2689	2477	2219		478	2398	2202		478	2788	2467	2401	478		2475	2246	478	2757	2474	1805				478		2486	2372		478	2749	2515	1817	478		2499	1865
479	2689	2477	2219		479	2398	2202		479	2788	2467	2401	479		2475	2246	479	2757	2474	1805				479		2486	2372		479	2749	2515	1817	479		2499	1865
480	2689	2477	2219		480	2398	2202		480	2788	2467	2401	480		2475	2246	480	2757	2474	1805				480		2486	2372		480	2749	2515	1817	480		2499	1865
481	2689	2477	2210		481	2398	2202		481	2788	2467	2401	481		2475	2246	481	2757	2474	1805				481		2486	2372		481	2749	2515	1817	481		2499	1865
482	2689	2477	2210		482	2398	2202		482	2788	2467	2401	482		2475	2246	482	2757	2474	1805				482		2486	2372		482	2749	2512	1817	482		2499	1865
483	2689	2477	2210		483	2398	2202		483	2788	2467	2401	483		2475	2246	483	2757	2474	1805				483		2486	2372		483	2749	2495	1817	483		2499	1865
484	2689	2477	2210		484	2398	2202		484	2788	2467	2401	484		2475	2246	484	2757	2474	1805				484		2486	2372		484	2749	2495	1817	484		2499	1865
485	2689	2477	2210		485	2398	2202		485	2788	2467	2401	485		2475	2246	485	2757	2474	1805				485		2486	2372		485	2749	2495	1817	485		2499	1865
486	2689	2477	2210		486	2398	2202		486	2788	2467	2401	486		2475	2246	486	2757	2474	1805				486		2486	2372		486	2749	2495	1817	486		2499	1865
487	2689	2477	2210		487	2398	2202		487	2788	2467	2401	487		2475	2246	487	2757	2474	1805				487		2486	2372		487	2749	2495	1817	487		2499	1865
488	2689	2477	2210		488	2398	2202		488	2788	2467	2401	488		2475	2246	488	2757	2474	1805				488		2486	2372		488	2749	2495	1817	488		2499	1865
489	2689	2477	2210		489	2398	2202		489	2788	2467	2401	489		2475	2246	489	2757	2474	1805				489		2486	2372		489	2749	2495	1817	489		2499	1865
490	2689	2477	2210		490	2398	2202		490	2788	2467	2401	490		2475	2246	490	2757	2474	1805				490		2486	2372		490	2749	2495	1817	490		2499	1865
491	2689	2477	2210		491	2398	2202		491	2788	2467	2401	491		2475	2246	491	2757	2474	1805				491		2486	2372		491	2749	2495	1817	491		2499	1865
492	2689	2477	2210		492	2398	2202		492	2788	2467	2401	492		2475	2246	492	2757	2474	1805				492		2486	2372		492	2749	2495	1817	492		2499	1865
493	2689	2477	2210		493	2398	2202		493	2788	2467	2401	493		2475	2246	493	2757	2474	1805				493		2486	2372		493	2749	2495	1817	493		2499	1865
494	2689	2477	2210		494	2398	2202		494	2788	2467	2401	494		2475	2246	494	2757	2474	1805				494		2486	2372		494	2749	2495	1817	494		2499	1865
495	2689	2475	2210		495	2398	2202		495	2788	2467	2401	495		2475	2246	495	2757	2474	1805				495		2486	2372		495	2749	2495	1817	495		2499	1865
496	2689	2475	2210		496	2398	2202		496	2788	2467	2401	496		2475	2246	496	2757	2474	1805				496		2486	2372		496	2749	2495	1817	496		2499	1865
497	2689	2475	2205		497	2398	2202		497	2788	2467	2401	497		2475	2246	497	2757	2474	1805				497		2486	2372		497	2749	2495	1817	497		2499	1865
498	2689	2475	2205		498	2398	2202		498	2788	2467	2401	498		2475	2231	498	2757	2474	1805				498		2486	2372		498	2749	2495	1817	498		2499	1865
499	2689	2475	2205		499	2398	2202		499	2788	2467	2401	499		2475	2231	499	2757	2470	1805				499		2486	2372		499	2749	2495	1817	499		2499	1865
500	2689	2475	2205		500	2398	2202		500	2788	2467	2401	500		2475	2231	500	2757	2470	1805				500		2486	2372		500	2749	2495	1817	500		2499	1865
501	2689	2475	2205		501	2398	2202		501	2788	2467	2401	501		2475	2231	501	2757	2470	1805				501		2486	2372		501	2749	2495	1817	501		2499	1865
502	2689	2475	2205		502	2398	2202		502	2788	2467	2401	502		2475	2231	502	2757	2470	1805				502		2486	2372		502	2749	2495	1817	502		2499	1865
503	2689	2475	2205		503	2398	2202		503	2788	2467	2391	503		2475	2231	503	2757	2470	1805				503		2486	2372		503	2749	2495	1817	503		2499	1865
504	2689	2475	2205		504	2398	2202		504	2788	2467	2391	504		2475	2231	504	2757	2470	1805				504		2486	2372		504	2749	2495	1817	504		2499	1865
505	2689	2475	2205		505	2398	2202		505	2788	2467	2391	505		2475	2231	505	2757	2470	1805				505		2486	2372		505	2749	2495	1817	505		2499	1865
506	2689	2475	2200		506	2398	2202		506	2788	2467	2391	506		2475	2231	506	2757	2470	1805				506		2486	2372		506	2749	2495	1817	506		2499	1865
507	2689	2475	2200		507	2398	2202		507	2788	2467	2391	507		2475	2231	507	2757	2470	1805				507		2486	2372		507	2749	2495	1817	507		2499	1865
508	2689	2475	2200		508	2398	2202		508	2788	2467	2391	508		2475	2231	508	2757	2470	1805				508		2486	2372		508	2749	2495	1817	508		2499	1865
509	2689	2475	2200		509	2398	2202		509	2754	2467	2391	509		2475	2231	509	2757	2470	1805				509		2486	2372		509	2749	2495	1817	509		2499	1865
510	2689	2475	2200		510	2398	2202		510	2754	2467	2391	510		2475	2231	510	2757	2470	1805				510		2486	2372		510	2749	2495	1817	510		2499	1865
511	2689	2475	2170		511	2398	2202		511	2754	2467	2391	511		2475	2231	511	2757	2470	1805				511		2486	2372		511	2749	2495	1817	511		2499	1865
512	2689	2475	2170		512	2398	2202		512	2754	2467	2391	512		2475	2231	512	2757	2470	1805				512		2486	2372		512	2749	2495	1817	512		2499	1865
513	2689	2475	2170		513	2398	2202		513	2754	2467	2391	513		2475	2231	513	2757	2470	1805				513		2486	2372		513	2749	2495	1817	513		2499	1865
514	2689	2475	2170		514	2398	2202		514	2754	2467	2391	514		2475	2231	514	2757	2470	1805				514		2486	2372		514	2749	2495	1817	514		2499	1865
515	2689	2475	2170		515	2398	2202		515	2754	2467	2391	515		2475	2231	515	2757	2470	1805				515		2486	2372		515	2749	2495	1817	515		2499	1865
516	2689	2475	2170		516	2398	2202		516	2754	2467	2391	516		2475	2231	516	2757	2470	1805				516		2486	2372		516	2749	2495	1817	516		2499	1865
517	2689	2475	2170		517	2398	2202		517	2754	2467	2391	517		2475	2231	517	2757	2470	1805				517		2486	2372		517	2749	2495	1817	517		2499	1865
518	2689	2475	2170		518	2398	2202		518	2754	2467	2391	518		2475	2231	518	2757	2470	1805				518		2486	2372		518	2749	2495	1817	518		2499	1865
519	2689	2475	2170		519	2398	2202		519	2754	2467	2391	519		2475	2231	519	2757	2470	1805				519		2486	2372		519	2749	2495	1817	519		2499	1865
520	2689	2475	2170		520	2398	2202		520	2754	2467	2391	520		2475	2231	520	2757	2470	1805				520		2460	2372		520	2749	2495	1817	520		2499	1865
521	2689	2475	2170		521	2398	2202		521	2754	2467	2391	521		2475	2231	521	2757	2470	1805				521		2460	2372		521	2749	2495	1817	521		2499	1865
522	2689	2475	2170		522	2398	2202		522	2754	2467	2391	522		2475	2231	522	2757	2470	1805				522		2460	2372		522	2749	2495	1817	522		2499	1865
523	2689	2475	2170		523	2398	2202		523	2754	2467	2391	523		2475	2231	523	2757	2470	1805				523		2460	2372		523	2749	2495	1817	523		2499	1865
524	2689	2475	2170		524	2398	2202		524	2754	2467	2391	524		2475	2231	524	2757	2470	1805				524		2460	2372		524	2749	2495	1817	524		2499	1865
525	2689	2475	2170		525	2398	2202		525	2754	2467	2391	525		2475	2231	525	2757	2470	1805				525		2460	2357		525	2749	2495	1817	525		2499	1865
526	2689	2475	2170		526	2398	2202		526	2754	2450	2391	526		2475	2231	526	2757	2470	1805				526		2460	2357		526	2749	2495	1817	526		2499	1865
527	2689	2475	2170		527	2398	2202		527	2754	2450	2391	527		2475	2231	527	2757	2470	1805				527		2460	2357		527	2749	2495	1817	527		2499	1865
528	2689	2475	2170		528	2398	2202		528	2754	2450	2391	528		2475	2231	528	2757	2470	1805				528		2460	2357		528	2749	2495	1817	528		2499	1865
529	2689	2475	2170		529	2398	2202		529	2754	2450	2391	529		2475	2231	529	2757	2470	1805				529		2460	2357		529	2749	2495	1817	529		2499	1865
530	2689	2475	2170		530	2398	2202		530	2754	2450	2391	530		2475	2231	530	2757	2470	1805				530		2460	2357		530	2749	2495	1817	530		2499	1865
531	2689	2475	2170		531	2398	2202		531	2754	2450	2391	531		2475	2231	531	2757	2470	1805				531		2460	2357		531	2749	2495	1817	531		2499	1865
532	2689	2475	2170		532	2398	2202		532	2754	2450	2391	532		2475	2231	532	2757	2470	1805				532		2460	2357		532	2749	2495	1817	532		2499	1865
533	2689	2475	2170		533	2398	2202		533	2754	2450	2391	533		2475	2231	533	2757	2470	1805				533		2460	2357		533	2749	2495	1817	533		2499	1865
534	2689	2475	2170		534	2398	2202		534	2754	2450	2391	534		2475	2231	534	2757	2470	1805				534		2460	2357		534	2749	2495	1817	534		2499	1865
535	2689	2475	2170		535	2398	2202		535	2754	2450	2391	535		2475	2231	535	2757	2470	1805				535		2460	2357		535	2749	2495	1817	535		2499	1865
536	2689	2475	2170		536	2398	2202		536	2754	2450	2391	536		2475	2231	536	2757	2470	1805				536		2460	2357		536	2749	2495	1817	536		2499	1865
537	2689	2475	2170		537	2398	2202		537	2754	2450	2391	537		2475	2231	537	2757	2470	1805				537		2460	2357		537	2749	2495	1817	537		2499	1865
538	2689	2475	2170		538	2398	2194		538	2754	2450	2391	538		2475	2231	538	2757	2470	1805				538		2460	2357		538	2749	2495	1817	538		2499	1865
539	2689	2475	2170		539	2398	2194		539	2754	2450	2391	539		2475	2231	539	2757	2470	1805				539		2460	2357		539	2749	2495	1817	539		2499	1865
540	2689	2475	2170		540	2398	2194		540	2754	2450	2391	540		2475	2231	540	2757	2470	1805				540		2460	2357		540	2749	2495	1817	540		2499	1865
541	2689	2475	2170		541	2398	2194		541	2754	2450	2391	541		2475	2231	541	2757	2461	1805				541		2460	2357		541	2749	2495	1817	541		2499	1865
542	2689	2475	2170		542	2398	2194		542	2754	2450	2391	542		2475	2231	542	2757	2461	1805				542		2460	2357		542	2749	2495	1817	542		2499	1865
543	2689	2475	2170		543	2398	2194		543	2754	2450	2391	543		2475	2231	543	2757	2461	1805				543		2460	2357		543	2749	2495	1817	543		2499	1865
544	2689	2475	2170		544	2398	2194		544	2754	2450	2391	544		2475	2231	544	2757	2461	1805				544		2460	2357		544	2749	2495	1817	544		2499	1865
545	2689	2475	2170		545	2398	2194		545	2754	2450	2391	545		2475	2231	545	2757	2461	1805				545		2460	2357		545	2749	2495	1817	545		2499	1865
546	2689	2475	2170		546	2398	2194		546	2754	2450	2379	546		2475	2231	546	2757	2461	1805				546		2460	2357		546	2749	2495	1817	546		2499	1865
547	2689	2475	2170		547	2398	2194		547	2754	2450	2379	547		2475	2231	547	2757	2461	1805				547		2460	2357		547	2749	2495	1817	547		2499	1865
548	2689	2475	2170		548	2398	2194		548	2754	2450	2379	548		2475	2231	548	2757	2461	1805				548		2460	2357		548	2749	2495	1817	548		2499	1865
549	2689	2475	2170		549	2398	2194		549	2754	2450	2379	549		2475	2231	549	2757	2461	1805				549		2460	2357		549	2749	2495	1817	549		2499	1865
550	2689	2475	2170		550	2398	2194		550	2754	2450	2379	550		2475	2231	550	2757	2461	1805				550		2460	2357		550	2749	2495	1817	550		2499	1865
551	2689	2475	2170		551	2398	2194		551	2754	2450	2379	551		2475	2231	551	2757	2461	1805				551		2460	2357		551	2749	2495	1817	551		2483	1865
552	2689	2475	2170		552	2398	2194		552	2754	2450	2379	552		2475	2231	552	2757	2461	1805				552		2460	2357		552	2749	2495	1817	552		2483	1865
553	2689	2475	2170		553	2398	2194		553	2754	2450	2379	553		2475	2231	553	2757	2461	1805				553		2460	2357		553	2749	2495	1817	553		2483	1865
554	2689	2475	2170		554	2398	2194		554	2754	2450	2379	554		2475	2231	554	2757	2461	1805				554		2460	2357		554	2749	2495	1817	554		2483	1865
555	2689	2475	2170		555	2398	2194		555	2754	2450	2379	555		2475	2231	555	2757	2461	1805				555		2460	2357		555	2749	2495	1817	555		2483	1838
556	2689	2475	2170		556	2398	2194		556	2754	2450	2379	556		2475	2231	556	2757	2461	1805				556		2460	2357		556	2749	2495	1817	556		2483	1838
557	2689	2475	2170		557	2398	2194		557	2754	2450	2379	557		2475	2231	557	2757	2461	1805				557		2460	2357		557	2749	2495	1817	557		2483	1838
558	2689	2475	2170		558	2398	2194		558	2754	2450	2379	558		2475	2231	558	2757	2461	1805				558		2460	2357		558	2749	2495	1817	558		2483	1838
559	2689	2475	2170		559	2398	2194		559	2754	2450	2379	559		2475	2231	559	2757	2461	1805				559		2460	2357		559	2749	2495	1817	559		2483	1838
560	2689	2475	2170		560	2398	2194		560	2754	2450	2379	560		2475	2231	560	2757	2461	1805				560		2460	2357		560	2749	2495	1817	560		2483	1838
561	2689	2475	2170		561	2398	2194		561	2754	2450	2379	561		2475	2231	561	2757	2461	1805				561		2460	2357		561	2749	2495	1817	561		2483	1838
562	2689	2475	2170		562	2398	2194		562	2754	2450	2379	562		2475	2231	562	2757	2461	1805				562		2460	2357		562	2749	2495	1817	562		2483	1838
563	2689	2475	2170		563	2398	2194		563	2754	2450	2379	563		2475	2231	563	2757	2461	1805				563		2460	2357		563	2749	2495	1817	563		2483	1838
564	2689	2475	2170		564	2398	2194		564	2754	2450	2379	564		2475	2231	564	2757	2461	1805				564		2460	2357		564	2749	2495	1817	564		2483	1838
565	2689	2475	2170		565	2398	2194		565	2754	2450	2379	565		2475	2231	565	2757	2461	1805				565		2460	2357		565	2749	2495	1817	565		2483	1838
566	2689	2475	2170		566	2398	2194		566	2754	2450	2379	566		2475	2231	566	2757	2461	1805				566		2460	2357		566	2749	2495	1817	566		2483	1838
567	2689	2475	2170		567	2398	2194		567	2754	2450	2379	567		2475	2231	567	2757	2461	1805				567		2460	2357		567	2749	2495	1817	567		2483	1838
568	2689	2475	2170		568	2398	2194		568	2754	2450	2379	568		2475	2231	568	2757	2461	1805				568		2460	2357		568	2749	2495	1817	568		2483	1838
569	2689	2475	2170		569	2398	2194		569	2754	2450	2379	569		2475	2231	569	2757	2461	1805				569		2460	2357		569	2749	2495	1817	569		2483	1838
570	2689	2475	2170		570	2398	2194		570	2754	2450	2379	570		2475	2231	570	2757	2461	1805				570		2460	2357		570	2749	2495	1817	570		2483	1838
571	2689	2475	2170		571	2398	2194		571	2754	2450	2379	571		2475	2231	571	2757	2461	1805				571		2460	2357		571	2749	2495	1817	571		2483	1838
572	2689	2475	2170		572	2398	2194		572	2754	2442	2379	572		2475	2231	572	2757	2461	1805				572		2460	2357		572	2749	2495	1817	572		2483	1838
573	2689	2475	2170		573	2398	2194		573	2754	2442	2379	573		2475	2231	573	2757	2461	1805				573		2460	2357		573	2749	2495	1817	573		2483	1838
574	2689	2475	2170		574	2398	2194		574	2754	2442	2379	574		2475	2231	574	2757	2461	1805				574		2460	2357		574	2749	2495	1817	574		2483	1838
575	2689	2470	2170		575	2398	2194		575	2754	2442	2379	575		2475	2231	575	2757	2461	1805				575		2460	2357		575	2749	2495	1817	575		2483	1838
576	2689	2470	2170		576	2398	2194		576	2754	2442	2379	576		2475	2231	576	2757	2461	1805				576		2460	2357		576	2749	2495	1817	576		2483	1838
577	2689	2470	2170		577	2398	2194		577	2754	2442	2379	577		2475	2231	577	2757	2461	1805				577		2460	2357		577	2749	2495	1817	577		2483	1838
578	2689	2470	2170		578	2398	2194		578	2754	2442	2379	578		2475	2231	578	2757	2461	1805				578		2460	2347		578	2749	2495	1817	578		2483	1838
579	2689	2470	2170		579	2398	2194		579	2754	2442	2379	579		2475	2231	579	2747	2461	1805				579		2460	2347		579	2749	2495	1817	579		2483	1838
580	2689	2470	2170		580	2398	2194		580	2754	2442	2379	580		2475	2231	580	2747	2461	1805				580		2460	2347		580	2749	2495	1817	580		2483	1838
581	2689	2470	2170		581	2398	2194		581	2754	2442	2379	581		2475	2231	581	2747	2461	1805				581		2460	2347		581	2749	2495	1817	581		2469	1838
582	2689	2470	2170		582	2398	2194		582	2754	2442	2379	582		2475	2231	582	2747	2461	1805				582		2460	2347		582	2749	2495	1817	582		2469	1838
583	2689	2470	2170		583	2398	2194		583	2754	2442	2379	583		2475	2231	583	2747	2461	1805				583		2460	2325		583	2749	2495	1817	583		2469	1838
584	2689	2470	2170		584	2398	2194		584	2754	2442	2379	584		2475	2231	584	2747	2461	1805				584		2460	2325		584	2749	2495	1817	584		2469	1838
585	2689	2470	2170		585	2398	2194		585	2754	2442	2379	585		2475	2231	585	2747	2461	1805				585		2460	2325		585	2749	2495	1817	585		2469	1838
586	2689	2470	2170		586	2398	2194		586	2754	2442	2378	586		2475	2231	586	2710	2448	1805				586		2460	2325		586	2749	2495	1817	586		2469	1838
587	2689	2470	2170		587	2398	2194		587	2754	2442	2378	587		2475	2231	587	2710	2448	1783				587		2460	2325		587	2749	2495	1813	587		2469	1838
588	2689	2470	2170		588	2398	2194		588	2754	2442	2378	588		2475	2231	588	2710	2448	1783				588		2460	2325		588	2749	2495	1813	588		2469	1838
589	2689	2470	2170		589	2398	2194		589	2754	2442	2378	589		2475	2231	589	2710	2448	1783				589		2460	2325		589	2749	2495	1813	589		2469	1838
590	2689	2470	2170		590	2398	2194		590	2754	2442	2378	590		2475	2231	590	2710	2448	1783				590		2460	2325		590	2749	2495	1813	590		2469	1838
591	2689	2470	2170		591	2398	2194		591	2754	2442	2378	591		2475	2231	591	2710	2448	1783				591		2460	2325		591	2749	2495	1813	591		2469	1838
592	2689	2470	2170		592	2398	2194		592	2754	2442	2378	592		2475	2231	592	2710	2448	1783				592		2460	2325		592	2749	2495	1813	592		2469	1838
593	2689	2470	2170		593	2398	2194		593	2754	2442	2378	593		2475	2231	593	2710	2448	1783				593		2460	2325		593	2749	2495	1813	593		2469	1838
594	2689	2470	2170		594	2398	2194		594	2754	2442	2378	594		2475	2231	594	2710	2448	1783				594		2460	2325		594	2749	2495	1813	594		2469	1838
595	2689	2470	2170		595	2398	2194		595	2754	2442	2378	595		2475	2231	595	2710	2448	1783				595		2460	2325		595	2749	2495	1813	595		2469	1838
596	2689	2470	2170		596	2398	2194		596	2754	2442	2378	596		2475	2231	596	2710	2448	1783				596		2460	2325		596	2749	2495	1813	596		2469	1838
597	2689	2470	2170		597	2398	2194		597	2754	2442	2378	597		2475	2231	597	2710	2448	1783				597		2460	2325		597	2749	2495	1813	597		2469	1838
598	2689	2470	2170		598	2398	2194		598	2754	2442	2378	598		2475	2231	598	2710	2448	1783				598		2460	2325		598	2749	2495	1813	598		2469	1838
599	2689	2470	2170		599	2398	2194		599	2754	2442	2378	599		2475	2231	599	2710	2448	1783				599		2460	2325		599	2749	2495	1813	599		2469	1838
600	2689	2470	2170		600	2398	2194		600	2754	2442	2378	600		2475	2231	600	2710	2448	1783				600		2460	2325		600	2749	2495	1813	600		2469	1838
601	2689	2470	2170		601	2398	2194		601	2754	2442	2378	601		2475	2231	601	2710	2448	1783				601		2460	2325		601	2749	2495	1813	601		2469	1838
602	2689	2470	2170		602	2398	2194		602	2754	2442	2378	602		2475	2231	602	2710	2448	1783				602		2460	2325		602	2749	2495	1813	602		2469	1838
603	2689	2470	2170		603	2398	2194		603	2754	2442	2378	603		2475	2231	603	2710	2448	1783				603		2460	2325		603	2749	2495	1813	603		2469	1838
604	2689	2470	2170		604	2398	2194		604	2728	2442	2378	604		2475	2231	604	2710	2448	1783				604		2460	2325		604	2749	2495	1813	604		2469	1838
605	2689	2470	2170		605	2398	2194		605	2728	2442	2378	605		2475	2231	605	2710	2448	1783				605		2460	2325		605	2749	2495	1813	605		2469	1838
606	2689	2470	2170		606	2398	2194		606	2728	2442	2378	606		2475	2231	606	2710	2448	1783				606		2460	2325		606	2749	2495	1813	606		2469	1838
607	2689	2470	2170		607	2398	2194		607	2728	2442	2378	607		2475	2231	607	2710	2448	1783				607		2460	2325		607	2749	2495	1813	607		2469	1838
608	2689	2470	2170		608	2398	2194		608	2728	2442	2378	608		2475	2231	608	2710	2448	1783				608		2460	2325		608	2749	2495	1813	608		2469	1838
609	2689	2470	2170		609	2398	2194		609	2728	2442	2378	609		2475	2231	609	2710	2448	1783				609		2460	2325		609	2749	2495	1813	609		2469	1838
610	2689	2470	2170		610	2398	2194		610	2728	2442	2378	610		2475	2231	610	2710	2448	1778				610		2460	2325		610	2749	2495	1813	610		2469	1838
611	2689	2470	2170		611	2398	2194		611	2728	2442	2378	611		2475	2231	611	2710	2448	1778				611		2460	2325		611	2749	2495	1813	611		2469	1838
612	2689	2470	2170		612	2398	2194		612	2728	2442	2378	612		2475	2231	612	2710	2448	1778				612		2460	2313		612	2749	2495	1813	612		2469	1838
613	2689	2470	2170		613	2398	2194		613	2728	2442	2378	613		2475	2231	613	2710	2448	1778				613		2460	2313		613	2749	2495	1813	613		2469	1838
614	2689	2470	2170		614	2398	2194		614	2728	2442	2378	614		2475	2231	614	2710	2448	1778				614		2460	2313		614	2749	2495	1813	614		2469	1838
615	2689	2470	2170		615	2398	2194		615	2728	2442	2378	615		2475	2231	615	2710	2448	1778				615		2460	2313		615	2749	2495	1813	615		2469	1838
616	2689	2470	2170		616	2398	2191		616	2728	2442	2378	616		2475	2231	616	2710	2448	1778				616		2460	2313		616	2749	2495	1813	616		2469	1838
617	2689	2470	2170		617	2398	2191		617	2728	2442	2378	617		2475	2231	617	2710	2448	1778				617		2460	2313		617	2749	2495	1813	617		2469	1838
618	2689	2470	2170		618	2398	2189		618	2728	2442	2378	618		2475	2231	618	2710	2448	1778				618		2460	2313		618	2749	2495	1813	618		2469	1838
619	2689	2470	2170		619	2398	2189		619	2728	2442	2378	619		2475	2231	619	2710	2448	1778				619		2460	2313		619	2749	2495	1813	619		2469	1838
620	2689	2470	2170		620	2398	2189		620	2728	2442	2378	620		2475	2231	620	2710	2448	1778				620		2460	2313		620	2749	2495	1813	620		2469	1832
621	2689	2470	2170		621	2398	2189		621	2728	2442	2378	621		2475	2231	621	2710	2448	1778				621		2460	2313		621	2749	2495	1813	621		2469	1832
622	2689	2470	2170		622	2398	2182		622	2728	2442	2378	622		2475	2231	622	2710	2448	1778				622		2460	2313		622	2749	2495	1813	622		2469	1832
623	2689	2470	2170		623	2398	2182		623	2728	2442	2378	623		2475	2231	623	2710	2448	1778				623		2460	2313		623	2749	2495	1813	623		2469	1832
624	2689	2470	2170		624	2398	2182		624	2728	2442	2378	624		2475	2231	624	2710	2448	1778				624		2460	2313		624	2749	2495	1813	624		2469	1832
625	2689	2470	2170		625	2398	2182		625	2728	2442	2375	625		2475	2231	625	2710	2448	1778				625		2460	2313		625	2749	2495	1813	625		2469	1832
626	2689	2470	2170		626	2398	2182		626	2728	2442	2375	626		2475	2231	626	2710	2448	1778				626		2460	2313		626	2749	2495	1813	626		2469	1832
627	2689	2470	2170		627	2398	2182		627	2728	2442	2375	627		2475	2231	627	2710	2448	1778				627		2460	2313		627	2749	2495	1813	627		2469	1832
628	2689	2470	2170		628	2398	2182		628	2728	2442	2375	628		2475	2231	628	2710	2448	1778				628		2460	2313		628	2749	2495	1813	628		2469	1832
629	2689	2470	2170		629	2398	2182		629	2728	2442	2375	629		2475	2231	629	2710	2448	1778				629		2460	2313		629	2749	2495	1813	629		2469	1832
630	2689	2470	2170		630	2398	2182		630	2728	2442	2375	630		2475	2231	630	2710	2448	1778				630		2460	2313		630	2749	2495	1810	630		2469	1832
631	2689	2470	2164		631	2398	2182		631	2728	2442	2375	631		2475	2231	631	2710	2448	1778				631		2460	2313		631	2749	2495	1810	631		2469	1832
632	2689	2470	2164		632	2398	2182		632	2728	2442	2375	632		2475	2231	632	2710	2448	1778				632		2460	2313		632	2717	2495	1810	632		2469	1832
633	2689	2470	2164		633	2398	2182		633	2728	2442	2375	633		2475	2231	633	2710	2448	1778				633		2460	2313		633	2717	2495	1810	633		2469	1832
634	2689	2470	2164		634	2398	2182		634	2728	2442	2375	634		2475	2231	634	2710	2448	1778				634		2460	2313		634	2717	2495	1810	634		2469	1832
635	2689	2470	2164		635	2398	2182		635	2728	2442	2375	635		2475	2231	635	2710	2448	1778				635		2460	2313		635	2717	2495	1810	635		2469	1832
636	2679	2470	2164		636	2398	2182		636	2728	2442	2375	636		2475	2231	636	2710	2448	1778				636		2460	2313		636	2717	2495	1810	636		2469	1832
637	2679	2470	2164		637	2398	2182		637	2728	2442	2375	637		2475	2223	637	2710	2448	1778				637		2460	2313		637	2717	2495	1810	637		2469	1832
638	2679	2470	2164		638	2398	2182		638	2728	2442	2375	638		2475	2223	638	2710	2448	1778				638		2460	2313		638	2717	2495	1810	638		2469	1832
639	2679	2470	2164		639	2398	2182		639	2728	2442	2375	639		2475	2223	639	2710	2448	1778				639		2460	2313		639	2717	2495	1810	639		2469	1832
640	2679	2470	2164		640	2398	2182		640	2728	2442	2375	640		2475	2223	640	2710	2448	1778				640		2460	2313		640	2717	2495	1810	640		2469	1832
641	2679	2470	2164		641	2398	2182		641	2728	2442	2375	641		2475	2223	641	2710	2448	1778				641		2460	2313		641	2717	2495	1810	641		2469	1832
642	2679	2470	2164		642	2398	2182		642	2728	2442	2375	642		2475	2222	642	2710	2448	1778				642		2460	2313		642	2717	2495	1810	642		2469	1832
643	2679	2470	2164		643	2398	2182		643	2728	2442	2375	643		2475	2222	643	2710	2448	1778				643		2460	2313		643	2717	2495	1789	643		2469	1832
644	2679	2470	2164		644	2398	2182		644	2728	2442	2375	644		2475	2222	644	2710	2448	1778				644		2460	2313		644	2717	2495	1789	644		2469	1832
645	2679	2470	2164		645	2398	2182		645	2728	2442	2342	645		2475	2222	645	2710	2448	1778				645		2460	2313		645	2717	2495	1789	645		2469	1832
646	2679	2470	2164		646	2398	2182		646	2728	2442	2342	646		2475	2222	646	2710	2448	1778				646		2460	2313		646	2717	2481	1789	646		2469	1832
647	2679	2470	2164		647	2398	2182		647	2728	2442	2342	647		2475	2222	647	2710	2448	1778				647		2460	2313		647	2717	2481	1789	647		2469	1821
648	2679	2470	2164		648	2398	2182		648	2728	2442	2342	648		2475	2222	648	2710	2448	1778				648		2460	2313		648	2717	2481	1789	648		2469	1821
649	2679	2470	2164		649	2398	2182		649	2728	2442	2342	649		2475	2222	649	2710	2448	1778				649		2460	2313		649	2717	2481	1789	649		2469	1821
650	2679	2470	2164		650	2398	2182		650	2728	2442	2342	650		2475	2222	650	2710	2448	1778				650		2460	2313		650	2717	2481	1789	650		2469	1821
651	2679	2470	2164		651	2398	2170		651	2728	2442	2342	651		2475	2222	651	2710	2448	1778				651		2460	2313		651	2717	2481	1789	651		2469	1821
652	2679	2470	2164		652	2398	2170		652	2728	2442	2342	652		2475	2222	652	2710	2448	1778				652		2460	2313		652	2717	2481	1789	652		2469	1821
653	2679	2470	2164		653	2398	2170		653	2728	2442	2342	653		2475	2222	653	2710	2448	1778				653		2460	2313		653	2717	2481	1789	653		2469	1821
654	2679	2470	2164		654	2398	2170		654	2728	2442	2342	654		2475	2222	654	2710	2448	1778				654		2460	2313		654	2717	2481	1789	654		2469	1821
655	2679	2470	2164		655	2398	2170		655	2728	2442	2342	655		2475	2222	655	2710	2448	1778				655		2460	2313		655	2717	2481	1789	655		2469	1821
656	2679	2470	2164		656	2398	2170		656	2728	2442	2342	656		2475	2222	656	2710	2448	1778				656		2460	2313		656	2717	2481	1789	656		2469	1821
657	2679	2470	2164		657	2398	2170		657	2728	2442	2342	657		2475	2204	657	2710	2448	1778				657		2460	2313		657	2717	2481	1789	657		2469	1821
658	2679	2470	2164		658	2398	2170		658	2728	2442	2342	658		2475	2204	658	2710	2448	1778				658		2460	2313		658	2717	2481	1789	658		2469	1821
659	2679	2470	2164		659	2398	2170		659	2728	2442	2342	659		2475	2204	659	2710	2448	1778				659		2460	2313		659	2717	2481	1789	659		2469	1821
660	2679	2470	2164		660	2398	2170		660	2728	2442	2342	660		2475	2204	660	2710	2448	1778				660		2460	2313		660	2717	2481	1789	660		2469	1821
661	2679	2470	2164		661	2398	2170		661	2728	2442	2342	661		2475	2204	661	2710	2448	1778				661		2460	2313		661	2717	2481	1788	661		2469	1821
662	2679	2470	2164		662	2398	2170		662	2728	2442	2342	662		2475	2204	662	2710	2448	1778				662		2460	2313		662	2717	2481	1788	662		2469	1821
663	2679	2470	2164		663	2398	2170		663	2728	2442	2342	663		2475	2204	663	2710	2448	1778				663		2460	2313		663	2717	2481	1788	663		2469	1821
664	2679	2470	2164		664	2398	2170		664	2728	2442	2342	664		2475	2204	664	2710	2448	1778				664		2460	2313		664	2717	2481	1788	664		2469	1821
665	2679	2470	2164		665	2398	2162		665	2728	2442	2342	665		2475	2204	665	2710	2448	1778				665		2460	2313		665	2717	2481	1788	665		2469	1821
666	2679	2470	2164		666	2398	2162		666	2728	2442	2342	666		2475	2204	666	2710	2448	1778				666		2460	2313		666	2717	2481	1788	666		2469	1821
667	2679	2470	2149		667	2398	2162		667	2728	2442	2342	667		2475	2204	667	2710	2448	1778				667		2460	2313		667	2717	2481	1788	667		2469	1821
668	2679	2470	2149		668	2398	2162		668	2728	2442	2342	668		2457	2204	668	2710	2448	1778				668		2460	2313		668	2717	2481	1767	668		2469	1821
669	2679	2470	2149		669	2398	2162		669	2728	2442	2342	669		2457	2204	669	2710	2448	1778				669		2460	2313		669	2717	2481	1767	669		2469	1821
670	2679	2470	2149		670	2398	2162		670	2728	2442	2342	670		2457	2203	670	2710	2448	1778				670		2460	2313		670	2717	2481	1767	670		2469	1821
671	2679	2470	2149		671	2398	2162		671	2728	2442	2342	671		2457	2203	671	2710	2448	1778				671		2460	2313		671	2717	2481	1767	671		2469	1821
672	2679	2470	2149		672	2398	2162		672	2728	2442	2342	672		2457	2203	672	2710	2448	1778				672		2460	2313		672	2717	2481	1767	672		2469	1821
673	2679	2470	2149		673	2398	2162		673	2728	2442	2342	673		2457	2203	673	2710	2448	1778				673		2460	2313		673	2717	2481	1767	673		2469	1821
674	2679	2470	2149		674	2398	2162		674	2728	2442	2342	674		2457	2203	674	2710	2448	1778				674		2460	2313		674	2717	2481	1767	674		2469	1821
675	2679	2470	2149		675	2398	2162		675	2728	2442	2342	675		2457	2203	675	2710	2448	1778				675		2460	2313		675	2717	2481	1767	675		2469	1821
676	2679	2470	2149		676	2398	2162		676	2728	2442	2342	676		2457	2203	676	2710	2448	1778				676		2460	2313		676	2717	2481	1767	676		2469	1821
677	2679	2470	2149		677	2398	2162		677	2728	2442	2342	677		2457	2203	677	2710	2448	1778				677		2460	2313		677	2717	2481	1767	677		2469	1821
678	2679	2470	2149		678	2398	2162		678	2728	2442	2342	678		2457	2203	678	2710	2448	1778				678		2460	2313		678	2717	2481	1767	678		2469	1821
679	2679	2470	2149		679	2398	2162		679	2728	2442	2342	679		2457	2203	679	2710	2448	1778				679		2460	2313		679	2717	2481	1767	679		2469	1821
[truncated: 321 more rows]

## Sheet: Convergence 100
	Scenario 1					Scenario 2				Scenario 3				Scenario 4				Scenario 5							Scenario 6					Scenario 7				Scenario 8
[truncated: 1,051 more rows]
